# Supplementary material for: Transcriptional reprogramming of the bud-mutation loquat YongLu emerging freezing resistant
Source: Research Square preprint supplement (doi:10.21203/rs.3.rs-108240/v1), 2020-11-16
Supplement: Supplementary file 1 [file 963d6e1ff12733d641fe2737.xlsx]

## Sheet: KEGG
Table S7a KEGG of DEGs in Flowers
Name	Count1	Count2	Count3	Count4	p	q	Gene_in_DE	Up_Gene	Up_Count	Down_Gene	Down_Count	Result
Ribosome	1901	2602	7875	19517	1.23034e-70	1.72247e-68	TRINITY_DN100342_c0_g1|K02876;TRINITY_DN100511_c0_g1|K02937;TRINITY_DN100814_c0_g1|K02942;TRINITY_DN100825_c0_g1|K02917;TRINITY_DN101703_c0_g1|K02920;TRINITY_DN101729_c0_g1|K02950;TRINITY_DN102515_c0_g1|K02912;TRINITY_DN102531_c0_g1|K02918;TRINITY_DN102762_c0_g1|K02889;TRINITY_DN102862_c0_g1|K02992;TRINITY_DN103281_c0_g1|K02903;TRINITY_DN103986_c0_g1|K02918;TRINITY_DN12413_c0_g1|K02979;TRINITY_DN…	TRINITY_DN100342_c0_g1|K02876;TRINITY_DN100511_c0_g1|K02937;TRINITY_DN100814_c0_g1|K02942;TRINITY_DN100825_c0_g1|K02917;TRINITY_DN101703_c0_g1|K02920;TRINITY_DN101729_c0_g1|K02950;TRINITY_DN102515_c0_g1|K02912;TRINITY_DN102531_c0_g1|K02918;TRINITY_DN102762_c0_g1|K02889;TRINITY_DN102862_c0_g1|K02992;TRINITY_DN103281_c0_g1|K02903;TRINITY_DN103986_c0_g1|K02918;TRINITY_DN12413_c0_g1|K02979;TRINITY_DN…	660	TRINITY_DN100028_c0_g1|K02985;TRINITY_DN100045_c0_g1|K02875;TRINITY_DN100048_c0_g1|K02975;TRINITY_DN100052_c0_g1|K02975;TRINITY_DN100081_c0_g1|K02922;TRINITY_DN100210_c0_g1|K02876;TRINITY_DN100341_c0_g1|K02956;TRINITY_DN100463_c0_g1|K02882;TRINITY_DN100566_c0_g1|K02949;TRINITY_DN100835_c0_g1|K02952;TRINITY_DN101114_c0_g1|K02871;TRINITY_DN101170_c0_g1|K02865;TRINITY_DN101171_c0_g1|K02917;TRINITY_D…	1241	yes
Phagosome	339	510	9437	21609	3.82173e-09	2.67521e-07	TRINITY_DN20537_c0_g1|K08488;TRINITY_DN21629_c0_g1|K08517;TRINITY_DN24813_c0_g2|K02146;TRINITY_DN34171_c0_g1|K02148;TRINITY_DN41315_c0_g1|K02155;TRINITY_DN42505_c0_g2|K08057;TRINITY_DN43554_c1_g1|K02155;TRINITY_DN51132_c0_g1|K07342;TRINITY_DN52278_c0_g1|K01365;TRINITY_DN52328_c0_g1|K02148;TRINITY_DN55889_c0_g1|K10089;TRINITY_DN58247_c0_g2|K02150;TRINITY_DN58617_c0_g3|K10415;TRINITY_DN59273_c0_g2|…	TRINITY_DN20537_c0_g1|K08488;TRINITY_DN21629_c0_g1|K08517;TRINITY_DN24813_c0_g2|K02146;TRINITY_DN34171_c0_g1|K02148;TRINITY_DN41315_c0_g1|K02155;TRINITY_DN42505_c0_g2|K08057;TRINITY_DN43554_c1_g1|K02155;TRINITY_DN51132_c0_g1|K07342;TRINITY_DN52278_c0_g1|K01365;TRINITY_DN52328_c0_g1|K02148;TRINITY_DN55889_c0_g1|K10089;TRINITY_DN58247_c0_g2|K02150;TRINITY_DN58617_c0_g3|K10415;TRINITY_DN59273_c0_g2|…	117	TRINITY_DN100591_c0_g1|K03661;TRINITY_DN100690_c0_g1|K02152;TRINITY_DN100910_c0_g1|K02151;TRINITY_DN101208_c0_g1|K01365;TRINITY_DN101609_c0_g1|K03661;TRINITY_DN101721_c0_g1|K08517;TRINITY_DN103057_c0_g1|K02155;TRINITY_DN103378_c0_g1|K07342;TRINITY_DN103452_c0_g1|K10089;TRINITY_DN105228_c0_g1|K02145;TRINITY_DN14560_c0_g1|K12478;TRINITY_DN15394_c0_g1|K02144;TRINITY_DN18191_c0_g1|K02149;TRINITY_DN19…	222	yes
Oxidative phosphorylation	572	998	9204	21121	2.9129e-07	1.35935e-05	TRINITY_DN102069_c0_g1|K03943;TRINITY_DN102397_c0_g1|K00236;TRINITY_DN10271_c0_g1|K03946;TRINITY_DN103344_c0_g1|K00237;TRINITY_DN104081_c0_g1|K03950;TRINITY_DN104949_c0_g1|K02141;TRINITY_DN24580_c0_g1|K03940;TRINITY_DN24813_c0_g2|K02146;TRINITY_DN25291_c0_g1|K03953;TRINITY_DN26063_c0_g1|K02265;TRINITY_DN30641_c0_g1|K03965;TRINITY_DN30846_c0_g1|K00413;TRINITY_DN31017_c0_g1|K03946;TRINITY_DN31964_c…	TRINITY_DN102069_c0_g1|K03943;TRINITY_DN102397_c0_g1|K00236;TRINITY_DN10271_c0_g1|K03946;TRINITY_DN103344_c0_g1|K00237;TRINITY_DN104081_c0_g1|K03950;TRINITY_DN104949_c0_g1|K02141;TRINITY_DN24580_c0_g1|K03940;TRINITY_DN24813_c0_g2|K02146;TRINITY_DN25291_c0_g1|K03953;TRINITY_DN26063_c0_g1|K02265;TRINITY_DN30641_c0_g1|K03965;TRINITY_DN30846_c0_g1|K00413;TRINITY_DN31017_c0_g1|K03946;TRINITY_DN31964_c…	231	TRINITY_DN100004_c0_g1|K00413;TRINITY_DN100379_c0_g1|K02134;TRINITY_DN100508_c0_g1|K02264;TRINITY_DN100591_c0_g1|K03661;TRINITY_DN100690_c0_g1|K02152;TRINITY_DN100910_c0_g1|K02151;TRINITY_DN101018_c0_g1|K00420;TRINITY_DN101037_c0_g1|K02269;TRINITY_DN101576_c0_g1|K02267;TRINITY_DN101609_c0_g1|K03661;TRINITY_DN102068_c0_g1|K00237;TRINITY_DN102221_c0_g1|K00417;TRINITY_DN102657_c0_g1|K00415;TRINITY_D…	341	yes
Citrate cycle (TCA cycle)	283	482	9493	21637	8.7046e-05	0.00275968	TRINITY_DN102397_c0_g1|K00236;TRINITY_DN103344_c0_g1|K00237;TRINITY_DN36062_c0_g1|K00237;TRINITY_DN56424_c0_g2|K00235;TRINITY_DN62637_c0_g2|K00237;TRINITY_DN66595_c0_g4|K00030;TRINITY_DN70655_c1_g1|K00658;TRINITY_DN72065_c0_g1|K00627;TRINITY_DN72972_c2_g4|K01899;TRINITY_DN73561_c1_g1|K01679;TRINITY_DN73561_c1_g3|K01679;TRINITY_DN73914_c5_g4|K00236;TRINITY_DN74056_c1_g1|K01681;TRINITY_DN74188_c1_g…	TRINITY_DN102397_c0_g1|K00236;TRINITY_DN103344_c0_g1|K00237;TRINITY_DN36062_c0_g1|K00237;TRINITY_DN56424_c0_g2|K00235;TRINITY_DN62637_c0_g2|K00237;TRINITY_DN66595_c0_g4|K00030;TRINITY_DN70655_c1_g1|K00658;TRINITY_DN72065_c0_g1|K00627;TRINITY_DN72972_c2_g4|K01899;TRINITY_DN73561_c1_g1|K01679;TRINITY_DN73561_c1_g3|K01679;TRINITY_DN73914_c5_g4|K00236;TRINITY_DN74056_c1_g1|K01681;TRINITY_DN74188_c1_g…	89	TRINITY_DN101373_c0_g1|K01610;TRINITY_DN101661_c0_g1|K01679;TRINITY_DN102068_c0_g1|K00237;TRINITY_DN103030_c0_g1|K01899;TRINITY_DN105383_c0_g1|K01647;TRINITY_DN11714_c0_g2|K00235;TRINITY_DN13050_c0_g1|K00382;TRINITY_DN15161_c0_g1|K00162;TRINITY_DN15161_c0_g2|K00162;TRINITY_DN19091_c0_g1|K00161;TRINITY_DN20619_c0_g1|K00627;TRINITY_DN22668_c0_g1|K00024;TRINITY_DN2805_c0_g1|K00026;TRINITY_DN28417_c0…	194	yes
Glycolysis / Gluconeogenesis	390	697	9386	21422	9.85598e-05	0.00275968	TRINITY_DN103505_c0_g1|K13953;TRINITY_DN104592_c0_g1|K03841;TRINITY_DN105329_c0_g1|K00873;TRINITY_DN10560_c0_g1|K00134;TRINITY_DN12115_c0_g1|K00002;TRINITY_DN19106_c0_g1|K01835;TRINITY_DN20270_c0_g1|K01792;TRINITY_DN20558_c0_g1|K01835;TRINITY_DN22008_c0_g1|K00850;TRINITY_DN28091_c0_g1|K15634;TRINITY_DN30195_c0_g1|K03841;TRINITY_DN33191_c0_g1|K01784|K01785;TRINITY_DN33719_c0_g1|K15634;TRINITY_DN35…	TRINITY_DN103505_c0_g1|K13953;TRINITY_DN104592_c0_g1|K03841;TRINITY_DN105329_c0_g1|K00873;TRINITY_DN10560_c0_g1|K00134;TRINITY_DN12115_c0_g1|K00002;TRINITY_DN19106_c0_g1|K01835;TRINITY_DN20270_c0_g1|K01792;TRINITY_DN20558_c0_g1|K01835;TRINITY_DN22008_c0_g1|K00850;TRINITY_DN28091_c0_g1|K15634;TRINITY_DN30195_c0_g1|K03841;TRINITY_DN33191_c0_g1|K01784|K01785;TRINITY_DN33719_c0_g1|K15634;TRINITY_DN35…	136	TRINITY_DN100009_c0_g1|K00927;TRINITY_DN100228_c0_g1|K01785;TRINITY_DN100457_c0_g1|K21071;TRINITY_DN100633_c0_g1|K01895;TRINITY_DN101373_c0_g1|K01610;TRINITY_DN101648_c0_g1|K14085;TRINITY_DN102852_c0_g1|K00002;TRINITY_DN103416_c0_g1|K13953;TRINITY_DN103708_c0_g1|K01834;TRINITY_DN105262_c0_g1|K00129;TRINITY_DN13050_c0_g1|K00382;TRINITY_DN13270_c0_g1|K01835;TRINITY_DN15161_c0_g1|K00162;TRINITY_DN15…	254	yes
AGE-RAGE signaling pathway in diabetic complications	100	138	9676	21981	0.000129356	0.00301831	TRINITY_DN16146_c0_g1|K07827;TRINITY_DN41058_c0_g2|K18050;TRINITY_DN47536_c0_g2|K04371;TRINITY_DN47546_c0_g4|K05858;TRINITY_DN47546_c0_g5|K05857;TRINITY_DN56686_c0_g1|K02159;TRINITY_DN60315_c0_g1|K07827;TRINITY_DN71699_c3_g2|K04392;TRINITY_DN72027_c7_g1|K04392;TRINITY_DN72027_c9_g2|K04392;TRINITY_DN72380_c5_g2|K04392;TRINITY_DN72528_c2_g1|K04392;TRINITY_DN72810_c4_g1|K07827;TRINITY_DN76872_c0_g1|…	TRINITY_DN16146_c0_g1|K07827;TRINITY_DN41058_c0_g2|K18050;TRINITY_DN47536_c0_g2|K04371;TRINITY_DN47546_c0_g4|K05858;TRINITY_DN47546_c0_g5|K05857;TRINITY_DN56686_c0_g1|K02159;TRINITY_DN60315_c0_g1|K07827;TRINITY_DN71699_c3_g2|K04392;TRINITY_DN72027_c7_g1|K04392;TRINITY_DN72027_c9_g2|K04392;TRINITY_DN72380_c5_g2|K04392;TRINITY_DN72528_c2_g1|K04392;TRINITY_DN72810_c4_g1|K07827;TRINITY_DN76872_c0_g1|…	23	TRINITY_DN13626_c0_g1|K08008;TRINITY_DN19101_c0_g1|K04392;TRINITY_DN20734_c0_g1|K08008;TRINITY_DN22815_c0_g1|K04456;TRINITY_DN22815_c0_g2|K04456;TRINITY_DN24043_c0_g1|K04392;TRINITY_DN26631_c0_g1|K08008;TRINITY_DN36426_c0_g1|K04392;TRINITY_DN38116_c0_g1|K04393;TRINITY_DN48909_c0_g2|K04392;TRINITY_DN5148_c0_g1|K07827;TRINITY_DN52573_c0_g1|K06237;TRINITY_DN52871_c0_g1|K04393;TRINITY_DN53732_c0_g1|K…	77	yes
Alanine, aspartate and glutamate metabolism	217	363	9559	21756	0.000266302	0.00532605	TRINITY_DN15396_c0_g1|K01580;TRINITY_DN38178_c0_g1|K00294;TRINITY_DN38178_c0_g2|K00294;TRINITY_DN42948_c0_g1|K00135;TRINITY_DN44329_c0_g1|K00135;TRINITY_DN44329_c0_g2|K00135;TRINITY_DN46087_c0_g2|K01580;TRINITY_DN50099_c0_g1|K15371;TRINITY_DN50504_c0_g1|K01953;TRINITY_DN50504_c0_g3|K01953;TRINITY_DN58634_c0_g1|K01755;TRINITY_DN63351_c0_g1|K14454;TRINITY_DN67027_c1_g3|K01755;TRINITY_DN68537_c0_g1|…	TRINITY_DN15396_c0_g1|K01580;TRINITY_DN38178_c0_g1|K00294;TRINITY_DN38178_c0_g2|K00294;TRINITY_DN42948_c0_g1|K00135;TRINITY_DN44329_c0_g1|K00135;TRINITY_DN44329_c0_g2|K00135;TRINITY_DN46087_c0_g2|K01580;TRINITY_DN50099_c0_g1|K15371;TRINITY_DN50504_c0_g1|K01953;TRINITY_DN50504_c0_g3|K01953;TRINITY_DN58634_c0_g1|K01755;TRINITY_DN63351_c0_g1|K14454;TRINITY_DN67027_c1_g3|K01755;TRINITY_DN68537_c0_g1|…	79	TRINITY_DN101689_c0_g1|K00135;TRINITY_DN104366_c0_g1|K01940;TRINITY_DN105328_c0_g1|K00820;TRINITY_DN14349_c0_g1|K00135;TRINITY_DN1833_c0_g1|K01580;TRINITY_DN19355_c0_g2|K00135;TRINITY_DN23210_c0_g1|K01939;TRINITY_DN2353_c0_g1|K00814;TRINITY_DN23668_c0_g1|K14455;TRINITY_DN23668_c0_g2|K14455;TRINITY_DN25999_c0_g1|K00764;TRINITY_DN25999_c0_g2|K00764;TRINITY_DN28881_c0_g1|K01953;TRINITY_DN29072_c0_g1…	138	yes
Carbon metabolism	834	1646	8942	20473	0.000476571	0.00755644	TRINITY_DN100010_c0_g1|K00863;TRINITY_DN100319_c0_g1|K00034;TRINITY_DN102364_c0_g1|K02437;TRINITY_DN102397_c0_g1|K00236;TRINITY_DN103344_c0_g1|K00237;TRINITY_DN104592_c0_g1|K03841;TRINITY_DN105329_c0_g1|K00873;TRINITY_DN10560_c0_g1|K00134;TRINITY_DN22008_c0_g1|K00850;TRINITY_DN28091_c0_g1|K15634;TRINITY_DN29424_c0_g1|K01070;TRINITY_DN30195_c0_g1|K03841;TRINITY_DN32022_c0_g1|K05605;TRINITY_DN32022…	TRINITY_DN100010_c0_g1|K00863;TRINITY_DN100319_c0_g1|K00034;TRINITY_DN102364_c0_g1|K02437;TRINITY_DN102397_c0_g1|K00236;TRINITY_DN103344_c0_g1|K00237;TRINITY_DN104592_c0_g1|K03841;TRINITY_DN105329_c0_g1|K00873;TRINITY_DN10560_c0_g1|K00134;TRINITY_DN22008_c0_g1|K00850;TRINITY_DN28091_c0_g1|K15634;TRINITY_DN29424_c0_g1|K01070;TRINITY_DN30195_c0_g1|K03841;TRINITY_DN32022_c0_g1|K05605;TRINITY_DN32022…	301	TRINITY_DN100009_c0_g1|K00927;TRINITY_DN100633_c0_g1|K01895;TRINITY_DN101262_c0_g1|K01053;TRINITY_DN101373_c0_g1|K01610;TRINITY_DN101506_c0_g1|K01965;TRINITY_DN101661_c0_g1|K01679;TRINITY_DN102068_c0_g1|K00237;TRINITY_DN102422_c0_g1|K01595;TRINITY_DN103030_c0_g1|K01899;TRINITY_DN103580_c0_g1|K07511;TRINITY_DN103708_c0_g1|K01834;TRINITY_DN103724_c0_g1|K01057;TRINITY_DN105383_c0_g1|K01647;TRINITY_D…	533	yes
Glyoxylate and dicarboxylate metabolism	305	544	9471	21575	0.000485771	0.00755644	TRINITY_DN102364_c0_g1|K02437;TRINITY_DN43720_c0_g3|K11517;TRINITY_DN45594_c0_g3|K03781;TRINITY_DN4841_c0_g1|K03781;TRINITY_DN50248_c0_g1|K00042;TRINITY_DN54131_c0_g2|K03781;TRINITY_DN54131_c0_g4|K03781;TRINITY_DN55134_c0_g2|K00281;TRINITY_DN62666_c0_g1|K11517;TRINITY_DN66340_c0_g2|K03781;TRINITY_DN66340_c0_g3|K03781;TRINITY_DN67343_c1_g2|K00626;TRINITY_DN69750_c0_g1|K01455;TRINITY_DN70865_c0_g2|…	TRINITY_DN102364_c0_g1|K02437;TRINITY_DN43720_c0_g3|K11517;TRINITY_DN45594_c0_g3|K03781;TRINITY_DN4841_c0_g1|K03781;TRINITY_DN50248_c0_g1|K00042;TRINITY_DN54131_c0_g2|K03781;TRINITY_DN54131_c0_g4|K03781;TRINITY_DN55134_c0_g2|K00281;TRINITY_DN62666_c0_g1|K11517;TRINITY_DN66340_c0_g2|K03781;TRINITY_DN66340_c0_g3|K03781;TRINITY_DN67343_c1_g2|K00626;TRINITY_DN69750_c0_g1|K01455;TRINITY_DN70865_c0_g2|…	111	TRINITY_DN101506_c0_g1|K01965;TRINITY_DN105383_c0_g1|K01647;TRINITY_DN13050_c0_g1|K00382;TRINITY_DN18561_c0_g1|K00626;TRINITY_DN22668_c0_g1|K00024;TRINITY_DN24316_c0_g1|K03781;TRINITY_DN24316_c0_g2|K03781;TRINITY_DN25924_c0_g1|K11517;TRINITY_DN2805_c0_g1|K00026;TRINITY_DN28504_c0_g1|K00281;TRINITY_DN29067_c0_g2|K01847;TRINITY_DN29418_c0_g1|K01569;TRINITY_DN29930_c0_g1|K00025;TRINITY_DN31295_c1_g1…	194	yes
Tyrosine metabolism	154	256	9622	21863	0.00157066	0.0219892	TRINITY_DN100114_c0_g1|K01557;TRINITY_DN103505_c0_g1|K13953;TRINITY_DN10635_c0_g1|K00838;TRINITY_DN15831_c0_g1|K00817;TRINITY_DN20720_c0_g1|K00451;TRINITY_DN35542_c0_g2|K00276;TRINITY_DN35657_c0_g1|K00838;TRINITY_DN37347_c0_g1|K00545;TRINITY_DN42404_c0_g1|K00457;TRINITY_DN42506_c0_g1|K02510;TRINITY_DN42837_c0_g1|K00457;TRINITY_DN42948_c0_g1|K00135;TRINITY_DN43848_c0_g2|K00838;TRINITY_DN44329_c0_g…	TRINITY_DN100114_c0_g1|K01557;TRINITY_DN103505_c0_g1|K13953;TRINITY_DN10635_c0_g1|K00838;TRINITY_DN15831_c0_g1|K00817;TRINITY_DN20720_c0_g1|K00451;TRINITY_DN35542_c0_g2|K00276;TRINITY_DN35657_c0_g1|K00838;TRINITY_DN37347_c0_g1|K00545;TRINITY_DN42404_c0_g1|K00457;TRINITY_DN42506_c0_g1|K02510;TRINITY_DN42837_c0_g1|K00457;TRINITY_DN42948_c0_g1|K00135;TRINITY_DN43848_c0_g2|K00838;TRINITY_DN44329_c0_g…	63	TRINITY_DN101689_c0_g1|K00135;TRINITY_DN101816_c0_g1|K01555;TRINITY_DN103405_c0_g1|K00457;TRINITY_DN103416_c0_g1|K13953;TRINITY_DN104017_c0_g1|K01800;TRINITY_DN105262_c0_g1|K00129;TRINITY_DN14349_c0_g1|K00135;TRINITY_DN19355_c0_g2|K00135;TRINITY_DN23668_c0_g1|K14455;TRINITY_DN23668_c0_g2|K14455;TRINITY_DN24984_c0_g1|K01555;TRINITY_DN24984_c0_g2|K01555;TRINITY_DN26150_c0_g1|K00545;TRINITY_DN26150_…	91	yes
Peroxisome	309	580	9467	21539	0.00424028	0.0539672	TRINITY_DN100997_c0_g1|K04565;TRINITY_DN101065_c0_g1|K07513;TRINITY_DN102885_c0_g1|K11147;TRINITY_DN15504_c0_g1|K00106;TRINITY_DN21100_c0_g1|K04564;TRINITY_DN23552_c0_g1|K08726;TRINITY_DN23552_c0_g2|K08726;TRINITY_DN24583_c0_g1|K04564;TRINITY_DN2786_c0_g1|K12261;TRINITY_DN36529_c0_g1|K08726;TRINITY_DN38197_c0_g1|K13239;TRINITY_DN38855_c0_g1|K13237;TRINITY_DN39763_c0_g1|K11992;TRINITY_DN40820_c0_g…	TRINITY_DN100997_c0_g1|K04565;TRINITY_DN101065_c0_g1|K07513;TRINITY_DN102885_c0_g1|K11147;TRINITY_DN15504_c0_g1|K00106;TRINITY_DN21100_c0_g1|K04564;TRINITY_DN23552_c0_g1|K08726;TRINITY_DN23552_c0_g2|K08726;TRINITY_DN24583_c0_g1|K04564;TRINITY_DN2786_c0_g1|K12261;TRINITY_DN36529_c0_g1|K08726;TRINITY_DN38197_c0_g1|K13239;TRINITY_DN38855_c0_g1|K13237;TRINITY_DN39763_c0_g1|K11992;TRINITY_DN40820_c0_g…	132	TRINITY_DN100883_c0_g1|K13348;TRINITY_DN100884_c0_g1|K01897;TRINITY_DN101560_c0_g1|K13299;TRINITY_DN102145_c0_g1|K01640;TRINITY_DN102855_c0_g1|K13347;TRINITY_DN103680_c0_g1|K04564;TRINITY_DN10691_c0_g1|K13299;TRINITY_DN10971_c0_g1|K12405;TRINITY_DN11674_c0_g1|K04565;TRINITY_DN13792_c0_g1|K08726;TRINITY_DN14416_c0_g1|K13279;TRINITY_DN14641_c0_g1|K13348;TRINITY_DN19682_c0_g1|K04565;TRINITY_DN20817_…	177	no
Pyruvate metabolism	283	528	9493	21591	0.00477179	0.0556709	TRINITY_DN105329_c0_g1|K00873;TRINITY_DN20871_c0_g1|K01649;TRINITY_DN20871_c0_g2|K01649;TRINITY_DN32644_c0_g1|K01759;TRINITY_DN43033_c0_g1|K00101;TRINITY_DN44416_c0_g2|K11262;TRINITY_DN58202_c0_g3|K11262;TRINITY_DN58202_c0_g4|K11262;TRINITY_DN61713_c0_g1|K00128;TRINITY_DN61713_c0_g2|K00128;TRINITY_DN63231_c0_g1|K01512;TRINITY_DN63577_c0_g2|K01069;TRINITY_DN65364_c0_g1|K00102;TRINITY_DN66316_c1_g1…	TRINITY_DN105329_c0_g1|K00873;TRINITY_DN20871_c0_g1|K01649;TRINITY_DN20871_c0_g2|K01649;TRINITY_DN32644_c0_g1|K01759;TRINITY_DN43033_c0_g1|K00101;TRINITY_DN44416_c0_g2|K11262;TRINITY_DN58202_c0_g3|K11262;TRINITY_DN58202_c0_g4|K11262;TRINITY_DN61713_c0_g1|K00128;TRINITY_DN61713_c0_g2|K00128;TRINITY_DN63231_c0_g1|K01512;TRINITY_DN63577_c0_g2|K01069;TRINITY_DN65364_c0_g1|K00102;TRINITY_DN66316_c1_g1…	87	TRINITY_DN100633_c0_g1|K01895;TRINITY_DN101373_c0_g1|K01610;TRINITY_DN101648_c0_g1|K14085;TRINITY_DN101661_c0_g1|K01679;TRINITY_DN102422_c0_g1|K01595;TRINITY_DN13050_c0_g1|K00382;TRINITY_DN15161_c0_g1|K00162;TRINITY_DN15161_c0_g2|K00162;TRINITY_DN15528_c0_g1|K00873;TRINITY_DN15742_c0_g1|K14085;TRINITY_DN15742_c0_g2|K14085;TRINITY_DN15839_c0_g1|K01069;TRINITY_DN18561_c0_g1|K00626;TRINITY_DN19091_c…	196	no
Endocytosis	463	907	9313	21212	0.00565798	0.0565798	TRINITY_DN101371_c0_g1|K12198;TRINITY_DN101763_c0_g1|K05755;TRINITY_DN102310_c0_g1|K12471;TRINITY_DN102369_c0_g1|K05754;TRINITY_DN17003_c0_g1|K05755;TRINITY_DN22360_c0_g1|K19476;TRINITY_DN22969_c0_g1|K10364;TRINITY_DN23646_c0_g1|K12185;TRINITY_DN24884_c0_g1|K19366;TRINITY_DN2585_c0_g1|K12200;TRINITY_DN26838_c0_g1|K05757;TRINITY_DN26838_c0_g2|K05757;TRINITY_DN27447_c0_g1|K05756;TRINITY_DN2930_c0_g…	TRINITY_DN101371_c0_g1|K12198;TRINITY_DN101763_c0_g1|K05755;TRINITY_DN102310_c0_g1|K12471;TRINITY_DN102369_c0_g1|K05754;TRINITY_DN17003_c0_g1|K05755;TRINITY_DN22360_c0_g1|K19476;TRINITY_DN22969_c0_g1|K10364;TRINITY_DN23646_c0_g1|K12185;TRINITY_DN24884_c0_g1|K19366;TRINITY_DN2585_c0_g1|K12200;TRINITY_DN26838_c0_g1|K05757;TRINITY_DN26838_c0_g2|K05757;TRINITY_DN27447_c0_g1|K05756;TRINITY_DN2930_c0_g…	159	TRINITY_DN100222_c0_g1|K12486;TRINITY_DN100608_c0_g1|K18467;TRINITY_DN102172_c0_g1|K12191;TRINITY_DN102375_c0_g1|K17918;TRINITY_DN102692_c0_g1|K10591;TRINITY_DN103627_c0_g1|K03283;TRINITY_DN103763_c0_g1|K04646;TRINITY_DN104318_c0_g1|K12493;TRINITY_DN104997_c0_g1|K12197;TRINITY_DN105207_c0_g1|K12194;TRINITY_DN10760_c0_g1|K12192;TRINITY_DN1197_c0_g1|K17919;TRINITY_DN14560_c0_g1|K12478;TRINITY_DN165…	304	no
Pentose and glucuronate interconversions	142	244	9634	21875	0.00552863	0.0565798	TRINITY_DN103242_c0_g1|K01213;TRINITY_DN103432_c0_g1|K00008;TRINITY_DN12115_c0_g1|K00002;TRINITY_DN21804_c0_g1|K19634;TRINITY_DN23661_c0_g1|K17818;TRINITY_DN36124_c0_g1|K00008;TRINITY_DN36568_c0_g1|K17743;TRINITY_DN42767_c0_g2|K01728;TRINITY_DN43431_c0_g1|K01184;TRINITY_DN48626_c0_g2|K00011;TRINITY_DN50089_c0_g1|K01213;TRINITY_DN51679_c0_g1|K01184;TRINITY_DN55045_c1_g1|K00008;TRINITY_DN5624_c0_g1…	TRINITY_DN103242_c0_g1|K01213;TRINITY_DN103432_c0_g1|K00008;TRINITY_DN12115_c0_g1|K00002;TRINITY_DN21804_c0_g1|K19634;TRINITY_DN23661_c0_g1|K17818;TRINITY_DN36124_c0_g1|K00008;TRINITY_DN36568_c0_g1|K17743;TRINITY_DN42767_c0_g2|K01728;TRINITY_DN43431_c0_g1|K01184;TRINITY_DN48626_c0_g2|K00011;TRINITY_DN50089_c0_g1|K01213;TRINITY_DN51679_c0_g1|K01184;TRINITY_DN55045_c1_g1|K00008;TRINITY_DN5624_c0_g1…	61	TRINITY_DN101211_c0_g1|K17743;TRINITY_DN102674_c0_g1|K01051;TRINITY_DN102852_c0_g1|K00002;TRINITY_DN104201_c0_g1|K19634;TRINITY_DN15407_c0_g1|K14273;TRINITY_DN18663_c0_g1|K18103;TRINITY_DN18663_c0_g2|K18103;TRINITY_DN22940_c0_g1|K00011;TRINITY_DN22940_c0_g2|K00002;TRINITY_DN23852_c0_g1|K01783;TRINITY_DN25556_c0_g1|K01805;TRINITY_DN25556_c0_g2|K01805;TRINITY_DN28392_c0_g2|K00002;TRINITY_DN28581_c0…	81	no
2-Oxocarboxylic acid metabolism	235	434	9541	21685	0.00674103	0.0629163	TRINITY_DN103412_c0_g1|K01438;TRINITY_DN10635_c0_g1|K00838;TRINITY_DN15025_c0_g1|K00825;TRINITY_DN16805_c0_g1|K01687;TRINITY_DN20871_c0_g1|K01649;TRINITY_DN20871_c0_g2|K01649;TRINITY_DN22090_c0_g1|K01653;TRINITY_DN22090_c0_g2|K01653;TRINITY_DN35657_c0_g1|K00838;TRINITY_DN43169_c0_g1|K17450;TRINITY_DN43848_c0_g2|K00838;TRINITY_DN45082_c0_g1|K12659;TRINITY_DN45082_c0_g2|K12659;TRINITY_DN47163_c0_g1…	TRINITY_DN103412_c0_g1|K01438;TRINITY_DN10635_c0_g1|K00838;TRINITY_DN15025_c0_g1|K00825;TRINITY_DN16805_c0_g1|K01687;TRINITY_DN20871_c0_g1|K01649;TRINITY_DN20871_c0_g2|K01649;TRINITY_DN22090_c0_g1|K01653;TRINITY_DN22090_c0_g2|K01653;TRINITY_DN35657_c0_g1|K00838;TRINITY_DN43169_c0_g1|K17450;TRINITY_DN43848_c0_g2|K00838;TRINITY_DN45082_c0_g1|K12659;TRINITY_DN45082_c0_g2|K12659;TRINITY_DN47163_c0_g1…	95	TRINITY_DN100182_c0_g1|K01687;TRINITY_DN105383_c0_g1|K01647;TRINITY_DN14726_c0_g1|K01653;TRINITY_DN16329_c0_g1|K17450;TRINITY_DN22323_c0_g1|K01649;TRINITY_DN22586_c0_g1|K00053;TRINITY_DN2353_c0_g1|K00814;TRINITY_DN23668_c0_g1|K14455;TRINITY_DN23668_c0_g2|K14455;TRINITY_DN23908_c0_g1|K00818;TRINITY_DN25283_c0_g1|K01687;TRINITY_DN31641_c0_g1|K00826;TRINITY_DN31767_c0_g1|K01702;TRINITY_DN32501_c0_g1…	140	no
Starch and sucrose metabolism	323	618	9453	21501	0.00763704	0.0668241	TRINITY_DN102994_c0_g1|K01210;TRINITY_DN103557_c0_g1|K01179;TRINITY_DN11684_c0_g1|K16055;TRINITY_DN14812_c0_g1|K01187;TRINITY_DN14812_c0_g2|K01187;TRINITY_DN19106_c0_g1|K01835;TRINITY_DN20558_c0_g1|K01835;TRINITY_DN23717_c0_g1|K05349;TRINITY_DN24753_c0_g1|K19668;TRINITY_DN27148_c0_g2|K01179;TRINITY_DN33396_c0_g1|K05349;TRINITY_DN34567_c0_g2|K18447;TRINITY_DN36713_c0_g1|K01084;TRINITY_DN4015_c0_g1…	TRINITY_DN102994_c0_g1|K01210;TRINITY_DN103557_c0_g1|K01179;TRINITY_DN11684_c0_g1|K16055;TRINITY_DN14812_c0_g1|K01187;TRINITY_DN14812_c0_g2|K01187;TRINITY_DN19106_c0_g1|K01835;TRINITY_DN20558_c0_g1|K01835;TRINITY_DN23717_c0_g1|K05349;TRINITY_DN24753_c0_g1|K19668;TRINITY_DN27148_c0_g2|K01179;TRINITY_DN33396_c0_g1|K05349;TRINITY_DN34567_c0_g2|K18447;TRINITY_DN36713_c0_g1|K01084;TRINITY_DN4015_c0_g1…	116	TRINITY_DN100177_c0_g1|K01194;TRINITY_DN105276_c0_g1|K00700;TRINITY_DN11012_c0_g1|K00697;TRINITY_DN13270_c0_g1|K01835;TRINITY_DN1763_c0_g1|K01210;TRINITY_DN18846_c0_g1|K05349;TRINITY_DN19550_c0_g1|K19357;TRINITY_DN19844_c0_g1|K01199;TRINITY_DN23422_c0_g1|K01210;TRINITY_DN23780_c0_g1|K00706;TRINITY_DN25335_c0_g1|K01835;TRINITY_DN25744_c0_g1|K01210;TRINITY_DN28372_c0_g1|K00700;TRINITY_DN29300_c0_g1…	207	no
Carbon fixation in photosynthetic organisms	215	400	9561	21719	0.0114595	0.0914862	TRINITY_DN104592_c0_g1|K03841;TRINITY_DN10560_c0_g1|K00134;TRINITY_DN30195_c0_g1|K03841;TRINITY_DN53141_c0_g1|K01624;TRINITY_DN547_c0_g1|K01623;TRINITY_DN63351_c0_g1|K14454;TRINITY_DN63980_c0_g1|K00615;TRINITY_DN65899_c0_g1|K01807;TRINITY_DN68867_c1_g1|K01624;TRINITY_DN71791_c0_g1|K14272;TRINITY_DN72040_c0_g1|K01807;TRINITY_DN72168_c0_g1|K00029;TRINITY_DN72317_c0_g1|K01803;TRINITY_DN73362_c0_g1|K…	TRINITY_DN104592_c0_g1|K03841;TRINITY_DN10560_c0_g1|K00134;TRINITY_DN30195_c0_g1|K03841;TRINITY_DN53141_c0_g1|K01624;TRINITY_DN547_c0_g1|K01623;TRINITY_DN63351_c0_g1|K14454;TRINITY_DN63980_c0_g1|K00615;TRINITY_DN65899_c0_g1|K01807;TRINITY_DN68867_c1_g1|K01624;TRINITY_DN71791_c0_g1|K14272;TRINITY_DN72040_c0_g1|K01807;TRINITY_DN72168_c0_g1|K00029;TRINITY_DN72317_c0_g1|K01803;TRINITY_DN73362_c0_g1|K…	72	TRINITY_DN100009_c0_g1|K00927;TRINITY_DN101373_c0_g1|K01610;TRINITY_DN102422_c0_g1|K01595;TRINITY_DN20555_c0_g1|K03841;TRINITY_DN20555_c0_g2|K03841;TRINITY_DN20684_c0_g1|K01624;TRINITY_DN22668_c0_g1|K00024;TRINITY_DN2353_c0_g1|K00814;TRINITY_DN23668_c0_g1|K14455;TRINITY_DN23668_c0_g2|K14455;TRINITY_DN23852_c0_g1|K01783;TRINITY_DN2805_c0_g1|K00026;TRINITY_DN28417_c0_g1|K01610;TRINITY_DN29930_c0_g1…	143	no
Protein processing in endoplasmic reticulum	605	1225	9171	20894	0.0117625	0.0914862	TRINITY_DN103191_c0_g1|K10578;TRINITY_DN103676_c0_g1|K03868;TRINITY_DN12204_c0_g2|K13989;TRINITY_DN13443_c0_g1|K04554;TRINITY_DN16521_c0_g1|K01230;TRINITY_DN18701_c0_g1|K09584;TRINITY_DN18818_c0_g1|K06689;TRINITY_DN19396_c0_g1|K12670;TRINITY_DN22988_c0_g1|K04555;TRINITY_DN23094_c0_g1|K13719;TRINITY_DN23709_c0_g1|K14018;TRINITY_DN28770_c0_g1|K14018;TRINITY_DN29931_c0_g1|K13249;TRINITY_DN34842_c0_g…	TRINITY_DN103191_c0_g1|K10578;TRINITY_DN103676_c0_g1|K03868;TRINITY_DN12204_c0_g2|K13989;TRINITY_DN13443_c0_g1|K04554;TRINITY_DN16521_c0_g1|K01230;TRINITY_DN18701_c0_g1|K09584;TRINITY_DN18818_c0_g1|K06689;TRINITY_DN19396_c0_g1|K12670;TRINITY_DN22988_c0_g1|K04555;TRINITY_DN23094_c0_g1|K13719;TRINITY_DN23709_c0_g1|K14018;TRINITY_DN28770_c0_g1|K14018;TRINITY_DN29931_c0_g1|K13249;TRINITY_DN34842_c0_g…	209	TRINITY_DN100124_c0_g1|K12667;TRINITY_DN100126_c0_g1|K13989;TRINITY_DN100156_c0_g1|K10839;TRINITY_DN100207_c0_g1|K04523;TRINITY_DN100401_c0_g1|K03094;TRINITY_DN100820_c0_g1|K13250;TRINITY_DN101345_c0_g1|K13249;TRINITY_DN101979_c0_g1|K12667;TRINITY_DN102342_c0_g1|K12666;TRINITY_DN102516_c0_g1|K14023;TRINITY_DN103378_c0_g1|K07342;TRINITY_DN103627_c0_g1|K03283;TRINITY_DN10438_c0_g1|K09580;TRINITY_DN…	396	no
Cysteine and methionine metabolism	264	508	9512	21611	0.0175056	0.128989	TRINITY_DN101133_c0_g1|K00641;TRINITY_DN10635_c0_g1|K00838;TRINITY_DN18484_c0_g1|K00641;TRINITY_DN33478_c0_g1|K01738;TRINITY_DN35657_c0_g1|K00838;TRINITY_DN43848_c0_g2|K00838;TRINITY_DN47272_c0_g2|K01758;TRINITY_DN50137_c0_g1|K01738;TRINITY_DN50137_c0_g3|K01738;TRINITY_DN55657_c0_g1|K01920;TRINITY_DN58251_c0_g1|K00772;TRINITY_DN61368_c0_g1|K01758;TRINITY_DN61903_c0_g1|K08963;TRINITY_DN63351_c0_g1…	TRINITY_DN101133_c0_g1|K00641;TRINITY_DN10635_c0_g1|K00838;TRINITY_DN18484_c0_g1|K00641;TRINITY_DN33478_c0_g1|K01738;TRINITY_DN35657_c0_g1|K00838;TRINITY_DN43848_c0_g2|K00838;TRINITY_DN47272_c0_g2|K01758;TRINITY_DN50137_c0_g1|K01738;TRINITY_DN50137_c0_g3|K01738;TRINITY_DN55657_c0_g1|K01920;TRINITY_DN58251_c0_g1|K00772;TRINITY_DN61368_c0_g1|K01758;TRINITY_DN61903_c0_g1|K08963;TRINITY_DN63351_c0_g1…	103	TRINITY_DN102709_c0_g1|K08964;TRINITY_DN12037_c0_g1|K01251;TRINITY_DN16275_c0_g1|K00003;TRINITY_DN19536_c0_g1|K01758;TRINITY_DN20542_c0_g1|K01697;TRINITY_DN22668_c0_g1|K00024;TRINITY_DN23668_c0_g1|K14455;TRINITY_DN23668_c0_g2|K14455;TRINITY_DN24492_c0_g1|K00547;TRINITY_DN25046_c0_g1|K00772;TRINITY_DN2633_c0_g1|K01920;TRINITY_DN2805_c0_g1|K00026;TRINITY_DN29930_c0_g1|K00025;TRINITY_DN31641_c0_g1|K…	161	no
Fatty acid degradation	171	316	9605	21803	0.0185981	0.130186	TRINITY_DN101065_c0_g1|K07513;TRINITY_DN103505_c0_g1|K13953;TRINITY_DN28164_c0_g2|K00252;TRINITY_DN38197_c0_g1|K13239;TRINITY_DN40820_c0_g1|K01897;TRINITY_DN50068_c0_g1|K00022;TRINITY_DN50469_c0_g2|K00232;TRINITY_DN52270_c0_g1|K07511;TRINITY_DN55981_c0_g1|K01897;TRINITY_DN61713_c0_g1|K00128;TRINITY_DN61713_c0_g2|K00128;TRINITY_DN62098_c0_g1|K07513;TRINITY_DN63540_c0_g1|K00121;TRINITY_DN65706_c0_g…	TRINITY_DN101065_c0_g1|K07513;TRINITY_DN103505_c0_g1|K13953;TRINITY_DN28164_c0_g2|K00252;TRINITY_DN38197_c0_g1|K13239;TRINITY_DN40820_c0_g1|K01897;TRINITY_DN50068_c0_g1|K00022;TRINITY_DN50469_c0_g2|K00232;TRINITY_DN52270_c0_g1|K07511;TRINITY_DN55981_c0_g1|K01897;TRINITY_DN61713_c0_g1|K00128;TRINITY_DN61713_c0_g2|K00128;TRINITY_DN62098_c0_g1|K07513;TRINITY_DN63540_c0_g1|K00121;TRINITY_DN65706_c0_g…	68	TRINITY_DN100884_c0_g1|K01897;TRINITY_DN101648_c0_g1|K14085;TRINITY_DN103416_c0_g1|K13953;TRINITY_DN103580_c0_g1|K07511;TRINITY_DN15742_c0_g1|K14085;TRINITY_DN15742_c0_g2|K14085;TRINITY_DN18561_c0_g1|K00626;TRINITY_DN20817_c0_g1|K07513;TRINITY_DN26205_c0_g1|K13239;TRINITY_DN26775_c0_g1|K01897;TRINITY_DN26775_c0_g2|K01897;TRINITY_DN26849_c0_g1|K07513;TRINITY_DN26849_c0_g2|K07513;TRINITY_DN28983_c0…	103	no
Lysine biosynthesis	75	124	9701	21995	0.0199569	0.133046	TRINITY_DN10635_c0_g1|K00838;TRINITY_DN15025_c0_g1|K00825;TRINITY_DN3315_c0_g1|K00290;TRINITY_DN35413_c0_g2|K00143;TRINITY_DN35657_c0_g1|K00838;TRINITY_DN43169_c0_g1|K17450;TRINITY_DN43848_c0_g2|K00838;TRINITY_DN59222_c0_g1|K01705;TRINITY_DN59222_c0_g2|K01705;TRINITY_DN67522_c0_g1|K05824;TRINITY_DN67557_c0_g1|K00133;TRINITY_DN68537_c0_g2|K00821;TRINITY_DN69170_c0_g4|K00133;TRINITY_DN69691_c1_g1|K…	TRINITY_DN10635_c0_g1|K00838;TRINITY_DN15025_c0_g1|K00825;TRINITY_DN3315_c0_g1|K00290;TRINITY_DN35413_c0_g2|K00143;TRINITY_DN35657_c0_g1|K00838;TRINITY_DN43169_c0_g1|K17450;TRINITY_DN43848_c0_g2|K00838;TRINITY_DN59222_c0_g1|K01705;TRINITY_DN59222_c0_g2|K01705;TRINITY_DN67522_c0_g1|K05824;TRINITY_DN67557_c0_g1|K00133;TRINITY_DN68537_c0_g2|K00821;TRINITY_DN69170_c0_g4|K00133;TRINITY_DN69691_c1_g1|K…	31	TRINITY_DN16275_c0_g1|K00003;TRINITY_DN16329_c0_g1|K17450;TRINITY_DN17447_c0_g1|K00293;TRINITY_DN30416_c0_g1|K00290;TRINITY_DN32065_c0_g1|K05823;TRINITY_DN35433_c0_g1|K01705;TRINITY_DN35433_c0_g2|K01705;TRINITY_DN35433_c0_g3|K01705;TRINITY_DN40047_c0_g1|K00838;TRINITY_DN40047_c0_g2|K00838;TRINITY_DN41299_c0_g1|K01586;TRINITY_DN45160_c0_g1|K00293;TRINITY_DN45160_c0_g3|K00293;TRINITY_DN45318_c0_g1|…	44	no
Tryptophan metabolism	182	346	9594	21773	0.0315767	0.200943	TRINITY_DN102262_c0_g1|K00486;TRINITY_DN10635_c0_g1|K00838;TRINITY_DN15025_c0_g1|K00825;TRINITY_DN28164_c0_g2|K00252;TRINITY_DN31428_c0_g1|K14264;TRINITY_DN35657_c0_g1|K00838;TRINITY_DN43848_c0_g2|K00838;TRINITY_DN44716_c0_g2|K00463;TRINITY_DN45594_c0_g3|K03781;TRINITY_DN4841_c0_g1|K03781;TRINITY_DN49378_c0_g1|K01426;TRINITY_DN50068_c0_g1|K00022;TRINITY_DN51174_c0_g1|K01556;TRINITY_DN52270_c0_g1|…	TRINITY_DN102262_c0_g1|K00486;TRINITY_DN10635_c0_g1|K00838;TRINITY_DN15025_c0_g1|K00825;TRINITY_DN28164_c0_g2|K00252;TRINITY_DN31428_c0_g1|K14264;TRINITY_DN35657_c0_g1|K00838;TRINITY_DN43848_c0_g2|K00838;TRINITY_DN44716_c0_g2|K00463;TRINITY_DN45594_c0_g3|K03781;TRINITY_DN4841_c0_g1|K03781;TRINITY_DN49378_c0_g1|K01426;TRINITY_DN50068_c0_g1|K00022;TRINITY_DN51174_c0_g1|K01556;TRINITY_DN52270_c0_g1|…	70	TRINITY_DN101648_c0_g1|K14085;TRINITY_DN10302_c0_g1|K01426;TRINITY_DN10302_c0_g2|K01426;TRINITY_DN103320_c0_g1|K01426;TRINITY_DN103580_c0_g1|K07511;TRINITY_DN105526_c0_g1|K11182;TRINITY_DN10779_c0_g1|K03392;TRINITY_DN10779_c0_g2|K03392;TRINITY_DN15742_c0_g1|K14085;TRINITY_DN15742_c0_g2|K14085;TRINITY_DN15926_c0_g1|K00463;TRINITY_DN18561_c0_g1|K00626;TRINITY_DN19509_c0_g2|K01556;TRINITY_DN22724_c0…	112	no
Butanoate metabolism	101	181	9675	21938	0.0353316	0.215062	TRINITY_DN100472_c0_g1|K01896;TRINITY_DN15396_c0_g1|K01580;TRINITY_DN22090_c0_g1|K01653;TRINITY_DN22090_c0_g2|K01653;TRINITY_DN36608_c0_g1|K00019;TRINITY_DN42948_c0_g1|K00135;TRINITY_DN44329_c0_g1|K00135;TRINITY_DN44329_c0_g2|K00135;TRINITY_DN46087_c0_g2|K01580;TRINITY_DN50068_c0_g1|K00022;TRINITY_DN52270_c0_g1|K07511;TRINITY_DN59181_c0_g1|K00217|K01027;TRINITY_DN65706_c0_g1|K07511;TRINITY_DN6586…	TRINITY_DN100472_c0_g1|K01896;TRINITY_DN15396_c0_g1|K01580;TRINITY_DN22090_c0_g1|K01653;TRINITY_DN22090_c0_g2|K01653;TRINITY_DN36608_c0_g1|K00019;TRINITY_DN42948_c0_g1|K00135;TRINITY_DN44329_c0_g1|K00135;TRINITY_DN44329_c0_g2|K00135;TRINITY_DN46087_c0_g2|K01580;TRINITY_DN50068_c0_g1|K00022;TRINITY_DN52270_c0_g1|K07511;TRINITY_DN59181_c0_g1|K00217|K01027;TRINITY_DN65706_c0_g1|K07511;TRINITY_DN6586…	47	TRINITY_DN101689_c0_g1|K00135;TRINITY_DN102145_c0_g1|K01640;TRINITY_DN103580_c0_g1|K07511;TRINITY_DN14349_c0_g1|K00135;TRINITY_DN14726_c0_g1|K01653;TRINITY_DN1833_c0_g1|K01580;TRINITY_DN18561_c0_g1|K00626;TRINITY_DN19355_c0_g2|K00135;TRINITY_DN24019_c0_g1|K01641;TRINITY_DN32397_c0_g1|K00074;TRINITY_DN34712_c0_g1|K00004;TRINITY_DN37542_c0_g1|K01580;TRINITY_DN37542_c0_g2|K01580;TRINITY_DN38976_c0_g…	54	no
Betalain biosynthesis	21	27	9755	22092	0.0377232	0.220052	TRINITY_DN18921_c0_g1|K15777;TRINITY_DN21808_c0_g1|K15777;TRINITY_DN37347_c0_g1|K00545;TRINITY_DN69340_c0_g1|K00545;TRINITY_DN70825_c1_g1|K00545;TRINITY_DN74298_c1_g1|K00505;TRINITY_DN76677_c0_g1|K00505;TRINITY_DN78297_c0_g3|K00505;TRINITY_DN93904_c0_g1|K00505;TRINITY_DN96934_c0_g1|K00505;TRINITY_DN26150_c0_g1|K00545;TRINITY_DN26150_c0_g2|K00545;TRINITY_DN28455_c0_g1|K00505;TRINITY_DN41860_c0_g1|…	TRINITY_DN18921_c0_g1|K15777;TRINITY_DN21808_c0_g1|K15777;TRINITY_DN37347_c0_g1|K00545;TRINITY_DN69340_c0_g1|K00545;TRINITY_DN70825_c1_g1|K00545;TRINITY_DN74298_c1_g1|K00505;TRINITY_DN76677_c0_g1|K00505;TRINITY_DN78297_c0_g3|K00505;TRINITY_DN93904_c0_g1|K00505;TRINITY_DN96934_c0_g1|K00505	10	TRINITY_DN26150_c0_g1|K00545;TRINITY_DN26150_c0_g2|K00545;TRINITY_DN28455_c0_g1|K00505;TRINITY_DN41860_c0_g1|K00505;TRINITY_DN51629_c0_g2|K00505;TRINITY_DN58434_c0_g1|K00505;TRINITY_DN61625_c0_g2|K00505;TRINITY_DN7410_c0_g1|K00505;TRINITY_DN74298_c0_g1|K00505;TRINITY_DN86484_c1_g2|K00505;TRINITY_DN93779_c0_g1|K00505	11	no
Pentose phosphate pathway	190	374	9586	21745	0.063591	0.35611	TRINITY_DN100319_c0_g1|K00034;TRINITY_DN104592_c0_g1|K03841;TRINITY_DN19106_c0_g1|K01835;TRINITY_DN20558_c0_g1|K01835;TRINITY_DN22008_c0_g1|K00850;TRINITY_DN30195_c0_g1|K03841;TRINITY_DN37422_c0_g2|K00616;TRINITY_DN37422_c0_g3|K00616;TRINITY_DN39712_c0_g1|K01057;TRINITY_DN51899_c0_g1|K01053;TRINITY_DN53141_c0_g1|K01624;TRINITY_DN547_c0_g1|K01623;TRINITY_DN55231_c0_g1|K00948;TRINITY_DN57802_c0_g2|…	TRINITY_DN100319_c0_g1|K00034;TRINITY_DN104592_c0_g1|K03841;TRINITY_DN19106_c0_g1|K01835;TRINITY_DN20558_c0_g1|K01835;TRINITY_DN22008_c0_g1|K00850;TRINITY_DN30195_c0_g1|K03841;TRINITY_DN37422_c0_g2|K00616;TRINITY_DN37422_c0_g3|K00616;TRINITY_DN39712_c0_g1|K01057;TRINITY_DN51899_c0_g1|K01053;TRINITY_DN53141_c0_g1|K01624;TRINITY_DN547_c0_g1|K01623;TRINITY_DN55231_c0_g1|K00948;TRINITY_DN57802_c0_g2|…	76	TRINITY_DN100457_c0_g1|K21071;TRINITY_DN101262_c0_g1|K01053;TRINITY_DN103724_c0_g1|K01057;TRINITY_DN104248_c0_g1|K00852;TRINITY_DN13270_c0_g1|K01835;TRINITY_DN18386_c0_g1|K00948;TRINITY_DN20555_c0_g1|K03841;TRINITY_DN20555_c0_g2|K03841;TRINITY_DN20684_c0_g1|K01624;TRINITY_DN23101_c0_g2|K00851;TRINITY_DN23796_c0_g1|K00036;TRINITY_DN23852_c0_g1|K01783;TRINITY_DN25335_c0_g1|K01835;TRINITY_DN30218_c0…	114	no
Arginine biosynthesis	110	209	9666	21910	0.0772752	0.416097	TRINITY_DN103412_c0_g1|K01438;TRINITY_DN45082_c0_g1|K12659;TRINITY_DN45082_c0_g2|K12659;TRINITY_DN50099_c0_g1|K15371;TRINITY_DN51757_c0_g1|K01476;TRINITY_DN54684_c0_g1|K00620;TRINITY_DN55836_c0_g2|K00618;TRINITY_DN58634_c0_g1|K01755;TRINITY_DN59351_c0_g1|K12659;TRINITY_DN62506_c0_g1|K01438;TRINITY_DN63351_c0_g1|K14454;TRINITY_DN64521_c0_g1|K00818;TRINITY_DN65186_c0_g4|K01427;TRINITY_DN67027_c1_g3…	TRINITY_DN103412_c0_g1|K01438;TRINITY_DN45082_c0_g1|K12659;TRINITY_DN45082_c0_g2|K12659;TRINITY_DN50099_c0_g1|K15371;TRINITY_DN51757_c0_g1|K01476;TRINITY_DN54684_c0_g1|K00620;TRINITY_DN55836_c0_g2|K00618;TRINITY_DN58634_c0_g1|K01755;TRINITY_DN59351_c0_g1|K12659;TRINITY_DN62506_c0_g1|K01438;TRINITY_DN63351_c0_g1|K14454;TRINITY_DN64521_c0_g1|K00818;TRINITY_DN65186_c0_g4|K01427;TRINITY_DN67027_c1_g3…	44	TRINITY_DN104366_c0_g1|K01940;TRINITY_DN2353_c0_g1|K00814;TRINITY_DN23632_c0_g1|K01476;TRINITY_DN23668_c0_g1|K14455;TRINITY_DN23668_c0_g2|K14455;TRINITY_DN23908_c0_g1|K00818;TRINITY_DN29072_c0_g1|K15371;TRINITY_DN35907_c0_g1|K14541;TRINITY_DN35907_c0_g2|K14541;TRINITY_DN36057_c0_g1|K00814;TRINITY_DN38814_c0_g1|K00812;TRINITY_DN38842_c0_g1|K01457;TRINITY_DN38842_c0_g2|K01457;TRINITY_DN425_c0_g1|K0…	66	no
Fructose and mannose metabolism	173	344	9603	21775	0.0892537	0.449204	TRINITY_DN100010_c0_g1|K00863;TRINITY_DN101260_c0_g1|K14634;TRINITY_DN103432_c0_g1|K00008;TRINITY_DN104592_c0_g1|K03841;TRINITY_DN17738_c0_g1|K19355;TRINITY_DN21434_c0_g2|K19355;TRINITY_DN22008_c0_g1|K00850;TRINITY_DN22011_c0_g1|K18337;TRINITY_DN30195_c0_g1|K03841;TRINITY_DN30693_c0_g1|K12661;TRINITY_DN34567_c0_g2|K18447;TRINITY_DN36124_c0_g1|K00008;TRINITY_DN38823_c0_g1|K17497;TRINITY_DN39419_c0…	TRINITY_DN100010_c0_g1|K00863;TRINITY_DN101260_c0_g1|K14634;TRINITY_DN103432_c0_g1|K00008;TRINITY_DN104592_c0_g1|K03841;TRINITY_DN17738_c0_g1|K19355;TRINITY_DN21434_c0_g2|K19355;TRINITY_DN22008_c0_g1|K00850;TRINITY_DN22011_c0_g1|K18337;TRINITY_DN30195_c0_g1|K03841;TRINITY_DN30693_c0_g1|K12661;TRINITY_DN34567_c0_g2|K18447;TRINITY_DN36124_c0_g1|K00008;TRINITY_DN38823_c0_g1|K17497;TRINITY_DN39419_c0…	94	TRINITY_DN100457_c0_g1|K21071;TRINITY_DN100519_c0_g1|K01809;TRINITY_DN102590_c0_g1|K02377;TRINITY_DN14985_c0_g1|K12660;TRINITY_DN18722_c0_g1|K19029;TRINITY_DN20129_c0_g2|K01711;TRINITY_DN20555_c0_g1|K03841;TRINITY_DN20555_c0_g2|K03841;TRINITY_DN20684_c0_g1|K01624;TRINITY_DN22940_c0_g1|K00011;TRINITY_DN25556_c0_g1|K01805;TRINITY_DN25556_c0_g2|K01805;TRINITY_DN32987_c0_g3|K01623;TRINITY_DN33655_c0_…	79	no
Glycosaminoglycan degradation	16	22	9760	22097	0.0898408	0.449204	TRINITY_DN104300_c0_g1|K01135;TRINITY_DN27387_c0_g1|K12373;TRINITY_DN3264_c0_g2|K01195;TRINITY_DN32749_c0_g1|K01205;TRINITY_DN35791_c0_g2|K01207;TRINITY_DN44019_c0_g1|K01135;TRINITY_DN45736_c0_g1|K12373;TRINITY_DN45736_c0_g2|K12373;TRINITY_DN58164_c0_g2|K12373;TRINITY_DN66528_c0_g1|K12373;TRINITY_DN66528_c0_g3|K12373;TRINITY_DN69500_c0_g1|K12373;TRINITY_DN69500_c0_g2|K12373;TRINITY_DN76169_c0_g1|…	.	0	TRINITY_DN104300_c0_g1|K01135;TRINITY_DN27387_c0_g1|K12373;TRINITY_DN3264_c0_g2|K01195;TRINITY_DN32749_c0_g1|K01205;TRINITY_DN35791_c0_g2|K01207;TRINITY_DN44019_c0_g1|K01135;TRINITY_DN45736_c0_g1|K12373;TRINITY_DN45736_c0_g2|K12373;TRINITY_DN58164_c0_g2|K12373;TRINITY_DN66528_c0_g1|K12373;TRINITY_DN66528_c0_g3|K12373;TRINITY_DN69500_c0_g1|K12373;TRINITY_DN69500_c0_g2|K12373;TRINITY_DN76169_c0_g1|…	16	no
Glycosphingolipid biosynthesis - globo and isoglobo series	20	30	9756	22089	0.101777	0.491337	TRINITY_DN27387_c0_g1|K12373;TRINITY_DN35508_c0_g1|K07407;TRINITY_DN45736_c0_g1|K12373;TRINITY_DN45736_c0_g2|K12373;TRINITY_DN49644_c0_g1|K07407;TRINITY_DN51474_c0_g1|K07407;TRINITY_DN51474_c0_g3|K07407;TRINITY_DN58076_c0_g1|K07407;TRINITY_DN58076_c0_g2|K07407;TRINITY_DN58076_c0_g3|K07407;TRINITY_DN58164_c0_g2|K12373;TRINITY_DN66528_c0_g1|K12373;TRINITY_DN66528_c0_g3|K12373;TRINITY_DN69500_c0_g1|…	.	0	TRINITY_DN27387_c0_g1|K12373;TRINITY_DN35508_c0_g1|K07407;TRINITY_DN45736_c0_g1|K12373;TRINITY_DN45736_c0_g2|K12373;TRINITY_DN49644_c0_g1|K07407;TRINITY_DN51474_c0_g1|K07407;TRINITY_DN51474_c0_g3|K07407;TRINITY_DN58076_c0_g1|K07407;TRINITY_DN58076_c0_g2|K07407;TRINITY_DN58076_c0_g3|K07407;TRINITY_DN58164_c0_g2|K12373;TRINITY_DN66528_c0_g1|K12373;TRINITY_DN66528_c0_g3|K12373;TRINITY_DN69500_c0_g1|…	20	no
Tropane, piperidine and pyridine alkaloid biosynthesis	41	72	9735	22047	0.11625	0.542499	TRINITY_DN10635_c0_g1|K00838;TRINITY_DN15831_c0_g1|K00817;TRINITY_DN35542_c0_g2|K00276;TRINITY_DN35657_c0_g1|K00838;TRINITY_DN43848_c0_g2|K00838;TRINITY_DN63351_c0_g1|K14454;TRINITY_DN69691_c1_g1|K00838;TRINITY_DN69691_c1_g2|K00838;TRINITY_DN71345_c1_g3|K00276;TRINITY_DN71345_c1_g5|K00276;TRINITY_DN73117_c0_g1|K00812;TRINITY_DN73533_c0_g1|K14455;TRINITY_DN77617_c1_g3|K14455;TRINITY_DN77617_c1_g4|…	TRINITY_DN10635_c0_g1|K00838;TRINITY_DN15831_c0_g1|K00817;TRINITY_DN35542_c0_g2|K00276;TRINITY_DN35657_c0_g1|K00838;TRINITY_DN43848_c0_g2|K00838;TRINITY_DN63351_c0_g1|K14454;TRINITY_DN69691_c1_g1|K00838;TRINITY_DN69691_c1_g2|K00838;TRINITY_DN71345_c1_g3|K00276;TRINITY_DN71345_c1_g5|K00276;TRINITY_DN73117_c0_g1|K00812;TRINITY_DN73533_c0_g1|K14455;TRINITY_DN77617_c1_g3|K14455;TRINITY_DN77617_c1_g4|…	16	TRINITY_DN23668_c0_g1|K14455;TRINITY_DN23668_c0_g2|K14455;TRINITY_DN2391_c0_g1|K00808;TRINITY_DN38814_c0_g1|K00812;TRINITY_DN40047_c0_g1|K00838;TRINITY_DN40047_c0_g2|K00838;TRINITY_DN50601_c0_g1|K00812;TRINITY_DN50601_c0_g2|K00812;TRINITY_DN60414_c0_g1|K14454;TRINITY_DN60414_c0_g2|K14454;TRINITY_DN61530_c0_g2|K00817;TRINITY_DN64251_c0_g2|K08081;TRINITY_DN69691_c0_g7|K00838;TRINITY_DN72686_c0_g1|K…	25	no
Amino sugar and nucleotide sugar metabolism	245	505	9531	21614	0.120979	0.546359	TRINITY_DN100513_c0_g1|K01443;TRINITY_DN19106_c0_g1|K01835;TRINITY_DN20558_c0_g1|K01835;TRINITY_DN20612_c0_g1|K01183;TRINITY_DN21474_c0_g1|K01209;TRINITY_DN22618_c0_g1|K00698;TRINITY_DN25398_c0_g2|K12454;TRINITY_DN26341_c0_g1|K00326;TRINITY_DN33191_c0_g1|K01784|K01785;TRINITY_DN34487_c0_g1|K01183;TRINITY_DN34487_c0_g2|K01183;TRINITY_DN38823_c0_g1|K17497;TRINITY_DN39419_c0_g1|K00966;TRINITY_DN4359…	TRINITY_DN100513_c0_g1|K01443;TRINITY_DN19106_c0_g1|K01835;TRINITY_DN20558_c0_g1|K01835;TRINITY_DN20612_c0_g1|K01183;TRINITY_DN21474_c0_g1|K01209;TRINITY_DN22618_c0_g1|K00698;TRINITY_DN25398_c0_g2|K12454;TRINITY_DN26341_c0_g1|K00326;TRINITY_DN33191_c0_g1|K01784|K01785;TRINITY_DN34487_c0_g1|K01183;TRINITY_DN34487_c0_g2|K01183;TRINITY_DN38823_c0_g1|K17497;TRINITY_DN39419_c0_g1|K00966;TRINITY_DN4359…	88	TRINITY_DN100372_c0_g1|K01443;TRINITY_DN100519_c0_g1|K01809;TRINITY_DN102590_c0_g1|K02377;TRINITY_DN103117_c0_g1|K01443;TRINITY_DN103341_c0_g1|K08678;TRINITY_DN105328_c0_g1|K00820;TRINITY_DN11482_c0_g1|K00965;TRINITY_DN11482_c0_g2|K00965;TRINITY_DN13270_c0_g1|K01835;TRINITY_DN14325_c0_g1|K02564;TRINITY_DN19284_c0_g1|K00326;TRINITY_DN19284_c0_g2|K00326;TRINITY_DN1966_c0_g1|K08678;TRINITY_DN20079_c…	157	no
Isoquinoline alkaloid biosynthesis	55	102	9721	22017	0.134623	0.588977	TRINITY_DN103497_c0_g1|K13390;TRINITY_DN10635_c0_g1|K00838;TRINITY_DN35542_c0_g2|K00276;TRINITY_DN35657_c0_g1|K00838;TRINITY_DN43848_c0_g2|K00838;TRINITY_DN63351_c0_g1|K14454;TRINITY_DN69691_c1_g1|K00838;TRINITY_DN69691_c1_g2|K00838;TRINITY_DN71345_c1_g3|K00276;TRINITY_DN71345_c1_g5|K00276;TRINITY_DN73117_c0_g1|K00812;TRINITY_DN73533_c0_g1|K14455;TRINITY_DN74298_c1_g1|K00505;TRINITY_DN76677_c0_g1…	TRINITY_DN103497_c0_g1|K13390;TRINITY_DN10635_c0_g1|K00838;TRINITY_DN35542_c0_g2|K00276;TRINITY_DN35657_c0_g1|K00838;TRINITY_DN43848_c0_g2|K00838;TRINITY_DN63351_c0_g1|K14454;TRINITY_DN69691_c1_g1|K00838;TRINITY_DN69691_c1_g2|K00838;TRINITY_DN71345_c1_g3|K00276;TRINITY_DN71345_c1_g5|K00276;TRINITY_DN73117_c0_g1|K00812;TRINITY_DN73533_c0_g1|K14455;TRINITY_DN74298_c1_g1|K00505;TRINITY_DN76677_c0_g1…	22	TRINITY_DN23668_c0_g1|K14455;TRINITY_DN23668_c0_g2|K14455;TRINITY_DN28455_c0_g1|K00505;TRINITY_DN38814_c0_g1|K00812;TRINITY_DN40047_c0_g1|K00838;TRINITY_DN40047_c0_g2|K00838;TRINITY_DN41860_c0_g1|K00505;TRINITY_DN45543_c0_g1|K00274;TRINITY_DN50601_c0_g1|K00812;TRINITY_DN50601_c0_g2|K00812;TRINITY_DN51629_c0_g2|K00505;TRINITY_DN58434_c0_g1|K00505;TRINITY_DN60414_c0_g1|K14454;TRINITY_DN60414_c0_g2|…	33	no
beta-Alanine metabolism	102	202	9674	21917	0.149228	0.63309	TRINITY_DN15396_c0_g1|K01580;TRINITY_DN32022_c0_g1|K05605;TRINITY_DN32022_c0_g3|K05605;TRINITY_DN35542_c0_g2|K00276;TRINITY_DN37871_c0_g1|K13366;TRINITY_DN41545_c0_g1|K17839;TRINITY_DN46087_c0_g2|K01580;TRINITY_DN50205_c1_g1|K00140;TRINITY_DN52270_c0_g1|K07511;TRINITY_DN56382_c0_g2|K00129;TRINITY_DN61713_c0_g1|K00128;TRINITY_DN61713_c0_g2|K00128;TRINITY_DN62980_c1_g1|K05605;TRINITY_DN65492_c0_g1|…	TRINITY_DN15396_c0_g1|K01580;TRINITY_DN32022_c0_g1|K05605;TRINITY_DN32022_c0_g3|K05605;TRINITY_DN35542_c0_g2|K00276;TRINITY_DN37871_c0_g1|K13366;TRINITY_DN41545_c0_g1|K17839;TRINITY_DN46087_c0_g2|K01580;TRINITY_DN50205_c1_g1|K00140;TRINITY_DN52270_c0_g1|K07511;TRINITY_DN56382_c0_g2|K00129;TRINITY_DN61713_c0_g1|K00128;TRINITY_DN61713_c0_g2|K00128;TRINITY_DN62980_c1_g1|K05605;TRINITY_DN65492_c0_g1|…	37	TRINITY_DN101648_c0_g1|K14085;TRINITY_DN101912_c0_g1|K00207;TRINITY_DN103580_c0_g1|K07511;TRINITY_DN105262_c0_g1|K00129;TRINITY_DN15742_c0_g1|K14085;TRINITY_DN15742_c0_g2|K14085;TRINITY_DN16931_c0_g1|K01464;TRINITY_DN1833_c0_g1|K01580;TRINITY_DN24453_c0_g1|K00140;TRINITY_DN32958_c0_g2|K05605;TRINITY_DN35615_c0_g1|K00207;TRINITY_DN37142_c0_g1|K14085;TRINITY_DN37542_c0_g1|K01580;TRINITY_DN37542_c0_…	65	no
Glutathione metabolism	188	388	9588	21731	0.158904	0.649232	TRINITY_DN100907_c0_g1|K00432;TRINITY_DN104594_c0_g1|K00799;TRINITY_DN18375_c0_g1|K00799;TRINITY_DN18477_c0_g1|K00432;TRINITY_DN21359_c0_g1|K00799;TRINITY_DN24036_c0_g1|K00799;TRINITY_DN26408_c0_g1|K00799;TRINITY_DN36183_c0_g3|K00799;TRINITY_DN44817_c0_g1|K01469;TRINITY_DN49398_c0_g1|K00799;TRINITY_DN50761_c1_g1|K00799;TRINITY_DN53940_c0_g1|K00799;TRINITY_DN55634_c2_g2|K01581;TRINITY_DN55657_c0_g…	TRINITY_DN100907_c0_g1|K00432;TRINITY_DN104594_c0_g1|K00799;TRINITY_DN18375_c0_g1|K00799;TRINITY_DN18477_c0_g1|K00432;TRINITY_DN21359_c0_g1|K00799;TRINITY_DN24036_c0_g1|K00799;TRINITY_DN26408_c0_g1|K00799;TRINITY_DN36183_c0_g3|K00799;TRINITY_DN44817_c0_g1|K01469;TRINITY_DN49398_c0_g1|K00799;TRINITY_DN50761_c1_g1|K00799;TRINITY_DN53940_c0_g1|K00799;TRINITY_DN55634_c2_g2|K01581;TRINITY_DN55657_c0_g…	75	TRINITY_DN101560_c0_g1|K13299;TRINITY_DN102194_c0_g1|K00799;TRINITY_DN102220_c0_g1|K00799;TRINITY_DN10384_c0_g1|K00681;TRINITY_DN104662_c0_g1|K00799;TRINITY_DN105248_c0_g1|K00799;TRINITY_DN10691_c0_g1|K13299;TRINITY_DN16951_c0_g1|K00799;TRINITY_DN18572_c0_g1|K01469;TRINITY_DN19057_c0_g1|K00799;TRINITY_DN23406_c0_g1|K00799;TRINITY_DN23796_c0_g1|K00036;TRINITY_DN2633_c0_g1|K01920;TRINITY_DN26637_c0…	113	no
Glycosphingolipid biosynthesis - ganglio series	9	12	9767	22107	0.163686	0.649232	TRINITY_DN27387_c0_g1|K12373;TRINITY_DN45736_c0_g1|K12373;TRINITY_DN45736_c0_g2|K12373;TRINITY_DN58164_c0_g2|K12373;TRINITY_DN66528_c0_g1|K12373;TRINITY_DN66528_c0_g3|K12373;TRINITY_DN69500_c0_g1|K12373;TRINITY_DN69500_c0_g2|K12373;TRINITY_DN84432_c0_g1|K12373;	.	0	TRINITY_DN27387_c0_g1|K12373;TRINITY_DN45736_c0_g1|K12373;TRINITY_DN45736_c0_g2|K12373;TRINITY_DN58164_c0_g2|K12373;TRINITY_DN66528_c0_g1|K12373;TRINITY_DN66528_c0_g3|K12373;TRINITY_DN69500_c0_g1|K12373;TRINITY_DN69500_c0_g2|K12373;TRINITY_DN84432_c0_g1|K12373	9	no
Synthesis and degradation of ketone bodies	28	49	9748	22070	0.166945	0.649232	TRINITY_DN36608_c0_g1|K00019;TRINITY_DN59181_c0_g1|K00217|K01027;TRINITY_DN66314_c1_g1|K01640;TRINITY_DN67343_c1_g2|K00626;TRINITY_DN72732_c2_g1|K01027;TRINITY_DN72790_c0_g1|K01641;TRINITY_DN72828_c1_g1|K00626;TRINITY_DN72828_c1_g4|K00626;TRINITY_DN74479_c0_g1|K00019;TRINITY_DN78952_c0_g1|K01641;TRINITY_DN81260_c0_g1|K01027;TRINITY_DN97047_c0_g1|K01027;TRINITY_DN102145_c0_g1|K01640;TRINITY_DN1856…	TRINITY_DN36608_c0_g1|K00019;TRINITY_DN59181_c0_g1|K00217|K01027;TRINITY_DN66314_c1_g1|K01640;TRINITY_DN67343_c1_g2|K00626;TRINITY_DN72732_c2_g1|K01027;TRINITY_DN72790_c0_g1|K01641;TRINITY_DN72828_c1_g1|K00626;TRINITY_DN72828_c1_g4|K00626;TRINITY_DN74479_c0_g1|K00019;TRINITY_DN78952_c0_g1|K01641;TRINITY_DN81260_c0_g1|K01027;TRINITY_DN97047_c0_g1|K01027	12	TRINITY_DN102145_c0_g1|K01640;TRINITY_DN18561_c0_g1|K00626;TRINITY_DN24019_c0_g1|K01641;TRINITY_DN44633_c0_g1|K01640;TRINITY_DN44673_c0_g1|K01027;TRINITY_DN50066_c0_g1|K00626;TRINITY_DN50066_c0_g2|K00626;TRINITY_DN72732_c2_g9|K01027;TRINITY_DN72790_c0_g3|K01641;TRINITY_DN72828_c1_g5|K00626;TRINITY_DN72828_c1_g7|K00626;TRINITY_DN72828_c1_g8|K00626;TRINITY_DN75779_c0_g1|K01027;TRINITY_DN78952_c0_g6…	16	no
Taurine and hypotaurine metabolism	46	87	9730	22032	0.185434	0.701643	TRINITY_DN15396_c0_g1|K01580;TRINITY_DN46087_c0_g2|K01580;TRINITY_DN50099_c0_g1|K15371;TRINITY_DN70287_c0_g1|K00681;TRINITY_DN70287_c1_g1|K00681;TRINITY_DN70287_c1_g6|K00681;TRINITY_DN70287_c1_g7|K00681;TRINITY_DN70287_c1_g8|K00681;TRINITY_DN72795_c1_g4|K01580;TRINITY_DN72795_c1_g6|K01580;TRINITY_DN75729_c3_g2|K18592;TRINITY_DN75729_c3_g3|K18592;TRINITY_DN78449_c2_g7|K15371;TRINITY_DN79280_c3_g1|…	TRINITY_DN15396_c0_g1|K01580;TRINITY_DN46087_c0_g2|K01580;TRINITY_DN50099_c0_g1|K15371;TRINITY_DN70287_c0_g1|K00681;TRINITY_DN70287_c1_g1|K00681;TRINITY_DN70287_c1_g6|K00681;TRINITY_DN70287_c1_g7|K00681;TRINITY_DN70287_c1_g8|K00681;TRINITY_DN72795_c1_g4|K01580;TRINITY_DN72795_c1_g6|K01580;TRINITY_DN75729_c3_g2|K18592;TRINITY_DN75729_c3_g3|K18592;TRINITY_DN78449_c2_g7|K15371;TRINITY_DN79280_c3_g1|…	19	TRINITY_DN10384_c0_g1|K00681;TRINITY_DN1833_c0_g1|K01580;TRINITY_DN29072_c0_g1|K15371;TRINITY_DN37542_c0_g1|K01580;TRINITY_DN37542_c0_g2|K01580;TRINITY_DN51725_c0_g1|K03119;TRINITY_DN55792_c0_g1|K15371;TRINITY_DN55792_c0_g2|K15371;TRINITY_DN55841_c0_g1|K01580;TRINITY_DN55841_c0_g2|K01580;TRINITY_DN55841_c0_g3|K01580;TRINITY_DN55841_c0_g4|K01580;TRINITY_DN56083_c0_g2|K15371;TRINITY_DN56083_c0_g3|K…	27	no
Cholesterol metabolism	52	100	9724	22019	0.192453	0.709037	TRINITY_DN46601_c0_g2|K15040;TRINITY_DN49376_c0_g1|K00637;TRINITY_DN51830_c0_g1|K05770;TRINITY_DN52584_c0_g2|K20464;TRINITY_DN53722_c0_g1|K15040;TRINITY_DN58382_c0_g2|K05770;TRINITY_DN61230_c0_g2|K00637;TRINITY_DN63697_c0_g1|K12385;TRINITY_DN63697_c0_g3|K12385;TRINITY_DN63697_c0_g5|K12385;TRINITY_DN64623_c0_g3|K05862;TRINITY_DN68263_c0_g1|K01052;TRINITY_DN70679_c2_g3|K12385;TRINITY_DN71338_c0_g1|…	TRINITY_DN46601_c0_g2|K15040;TRINITY_DN49376_c0_g1|K00637;TRINITY_DN51830_c0_g1|K05770;TRINITY_DN52584_c0_g2|K20464;TRINITY_DN53722_c0_g1|K15040;TRINITY_DN58382_c0_g2|K05770;TRINITY_DN61230_c0_g2|K00637;TRINITY_DN63697_c0_g1|K12385;TRINITY_DN63697_c0_g3|K12385;TRINITY_DN63697_c0_g5|K12385;TRINITY_DN64623_c0_g3|K05862;TRINITY_DN68263_c0_g1|K01052;TRINITY_DN70679_c2_g3|K12385;TRINITY_DN71338_c0_g1|…	21	TRINITY_DN14784_c0_g1|K05770;TRINITY_DN18226_c0_g1|K20464;TRINITY_DN21757_c0_g1|K15040;TRINITY_DN23189_c0_g1|K20464;TRINITY_DN26218_c0_g2|K00637;TRINITY_DN3714_c0_g1|K05770;TRINITY_DN40070_c0_g2|K20464;TRINITY_DN41241_c0_g1|K00637;TRINITY_DN41382_c0_g1|K20464;TRINITY_DN41382_c0_g2|K20464;TRINITY_DN46608_c0_g1|K12385;TRINITY_DN46608_c0_g2|K12385;TRINITY_DN50780_c0_g1|K15040;TRINITY_DN60852_c0_g1|K…	31	no
Mannose type O-glycan biosynthesis	26	47	9750	22072	0.211816	0.753417	TRINITY_DN50953_c0_g3|K00728;TRINITY_DN50953_c0_g4|K00728;TRINITY_DN68568_c4_g2|K00728;TRINITY_DN68568_c4_g9|K00728;TRINITY_DN71704_c0_g13|K00728;TRINITY_DN71704_c0_g16|K00728;TRINITY_DN71704_c0_g8|K00728;TRINITY_DN73036_c1_g1|K00728;TRINITY_DN82320_c0_g2|K00728;TRINITY_DN82320_c0_g3|K00728;TRINITY_DN85678_c2_g4|K00728;TRINITY_DN85678_c2_g7|K00728;TRINITY_DN103638_c0_g1|K00728;TRINITY_DN26985_c0_…	TRINITY_DN50953_c0_g3|K00728;TRINITY_DN50953_c0_g4|K00728;TRINITY_DN68568_c4_g2|K00728;TRINITY_DN68568_c4_g9|K00728;TRINITY_DN71704_c0_g13|K00728;TRINITY_DN71704_c0_g16|K00728;TRINITY_DN71704_c0_g8|K00728;TRINITY_DN73036_c1_g1|K00728;TRINITY_DN82320_c0_g2|K00728;TRINITY_DN82320_c0_g3|K00728;TRINITY_DN85678_c2_g4|K00728;TRINITY_DN85678_c2_g7|K00728	12	TRINITY_DN103638_c0_g1|K00728;TRINITY_DN26985_c0_g1|K00728;TRINITY_DN39302_c0_g1|K00728;TRINITY_DN40042_c0_g1|K00728;TRINITY_DN44893_c0_g1|K00728;TRINITY_DN68568_c4_g1|K00728;TRINITY_DN68568_c4_g6|K00728;TRINITY_DN71704_c0_g1|K00728;TRINITY_DN71704_c0_g14|K00728;TRINITY_DN71704_c0_g17|K00728;TRINITY_DN71704_c0_g5|K00728;TRINITY_DN73036_c0_g1|K00728;TRINITY_DN73036_c0_g2|K00728;TRINITY_DN94088_c0_…	14	no
Arginine and proline metabolism	131	275	9645	21844	0.254565	0.835637	TRINITY_DN101295_c0_g1|K00819;TRINITY_DN102680_c0_g1|K00147;TRINITY_DN102796_c0_g1|K09471;TRINITY_DN12766_c0_g1|K00318;TRINITY_DN12860_c0_g1|K00819;TRINITY_DN37871_c0_g1|K13366;TRINITY_DN38178_c0_g1|K00294;TRINITY_DN38178_c0_g2|K00294;TRINITY_DN41545_c0_g1|K17839;TRINITY_DN43958_c0_g1|K01480;TRINITY_DN49378_c0_g1|K01426;TRINITY_DN51757_c0_g1|K01476;TRINITY_DN53790_c0_g1|K00286;TRINITY_DN54304_c0_…	TRINITY_DN101295_c0_g1|K00819;TRINITY_DN102680_c0_g1|K00147;TRINITY_DN102796_c0_g1|K09471;TRINITY_DN12766_c0_g1|K00318;TRINITY_DN12860_c0_g1|K00819;TRINITY_DN37871_c0_g1|K13366;TRINITY_DN38178_c0_g1|K00294;TRINITY_DN38178_c0_g2|K00294;TRINITY_DN41545_c0_g1|K17839;TRINITY_DN43958_c0_g1|K01480;TRINITY_DN49378_c0_g1|K01426;TRINITY_DN51757_c0_g1|K01476;TRINITY_DN53790_c0_g1|K00286;TRINITY_DN54304_c0_…	42	TRINITY_DN101648_c0_g1|K14085;TRINITY_DN10302_c0_g1|K01426;TRINITY_DN10302_c0_g2|K01426;TRINITY_DN103320_c0_g1|K01426;TRINITY_DN105526_c0_g1|K11182;TRINITY_DN14503_c0_g1|K00657;TRINITY_DN15615_c0_g1|K00819;TRINITY_DN15742_c0_g1|K14085;TRINITY_DN15742_c0_g2|K14085;TRINITY_DN18937_c0_g1|K01259;TRINITY_DN22724_c0_g1|K01426;TRINITY_DN23632_c0_g1|K01476;TRINITY_DN23668_c0_g1|K14455;TRINITY_DN23668_c0_…	89	no
Biosynthesis of amino acids	652	1431	9124	20688	0.260102	0.835637	TRINITY_DN102680_c0_g1|K00147;TRINITY_DN103412_c0_g1|K01438;TRINITY_DN105329_c0_g1|K00873;TRINITY_DN10560_c0_g1|K00134;TRINITY_DN10635_c0_g1|K00838;TRINITY_DN11857_c0_g1|K01693;TRINITY_DN15831_c0_g1|K00817;TRINITY_DN16805_c0_g1|K01687;TRINITY_DN20871_c0_g1|K01649;TRINITY_DN20871_c0_g2|K01649;TRINITY_DN22008_c0_g1|K00850;TRINITY_DN22090_c0_g1|K01653;TRINITY_DN22090_c0_g2|K01653;TRINITY_DN24079_c0_…	TRINITY_DN102680_c0_g1|K00147;TRINITY_DN103412_c0_g1|K01438;TRINITY_DN105329_c0_g1|K00873;TRINITY_DN10560_c0_g1|K00134;TRINITY_DN10635_c0_g1|K00838;TRINITY_DN11857_c0_g1|K01693;TRINITY_DN15831_c0_g1|K00817;TRINITY_DN16805_c0_g1|K01687;TRINITY_DN20871_c0_g1|K01649;TRINITY_DN20871_c0_g2|K01649;TRINITY_DN22008_c0_g1|K00850;TRINITY_DN22090_c0_g1|K01653;TRINITY_DN22090_c0_g2|K01653;TRINITY_DN24079_c0_…	282	TRINITY_DN100009_c0_g1|K00927;TRINITY_DN100182_c0_g1|K01687;TRINITY_DN103325_c0_g1|K00765;TRINITY_DN103708_c0_g1|K01834;TRINITY_DN104366_c0_g1|K01940;TRINITY_DN105383_c0_g1|K01647;TRINITY_DN14726_c0_g1|K01653;TRINITY_DN15528_c0_g1|K00873;TRINITY_DN16275_c0_g1|K00003;TRINITY_DN16329_c0_g1|K17450;TRINITY_DN17447_c0_g1|K00293;TRINITY_DN18386_c0_g1|K00948;TRINITY_DN19290_c0_g1|K15634;TRINITY_DN19536_…	370	no
Nitrogen metabolism	102	211	9674	21908	0.245245	0.835637	TRINITY_DN102835_c0_g1|K02575;TRINITY_DN32734_c0_g1|K02575;TRINITY_DN42514_c0_g1|K00367;TRINITY_DN50099_c0_g1|K15371;TRINITY_DN51986_c0_g1|K01674;TRINITY_DN55567_c1_g1|K00459;TRINITY_DN60308_c0_g4|K00459;TRINITY_DN66467_c0_g1|K17877;TRINITY_DN69750_c0_g1|K01455;TRINITY_DN70607_c0_g1|K00459;TRINITY_DN70607_c0_g2|K00459;TRINITY_DN71342_c0_g1|K01725;TRINITY_DN71342_c3_g1|K01725;TRINITY_DN72770_c1_g2…	TRINITY_DN102835_c0_g1|K02575;TRINITY_DN32734_c0_g1|K02575;TRINITY_DN42514_c0_g1|K00367;TRINITY_DN50099_c0_g1|K15371;TRINITY_DN51986_c0_g1|K01674;TRINITY_DN55567_c1_g1|K00459;TRINITY_DN60308_c0_g4|K00459;TRINITY_DN66467_c0_g1|K17877;TRINITY_DN69750_c0_g1|K01455;TRINITY_DN70607_c0_g1|K00459;TRINITY_DN70607_c0_g2|K00459;TRINITY_DN71342_c0_g1|K01725;TRINITY_DN71342_c3_g1|K01725;TRINITY_DN72770_c1_g2…	50	TRINITY_DN103671_c0_g1|K00459;TRINITY_DN18770_c0_g1|K01673;TRINITY_DN20366_c0_g1|K01673;TRINITY_DN29072_c0_g1|K15371;TRINITY_DN2997_c0_g1|K00264;TRINITY_DN35789_c0_g1|K00459;TRINITY_DN37021_c0_g3|K01501;TRINITY_DN37021_c0_g4|K01501;TRINITY_DN47688_c0_g1|K00262;TRINITY_DN48342_c0_g2|K00459;TRINITY_DN4846_c0_g2|K01915;TRINITY_DN51332_c0_g1|K01673;TRINITY_DN55006_c0_g1|K00261;TRINITY_DN55567_c0_g1|K…	52	no
Vitamin B6 metabolism	35	68	9741	22051	0.262629	0.835637	TRINITY_DN15593_c0_g1|K00868;TRINITY_DN47813_c0_g2|K13248;TRINITY_DN56367_c0_g1|K00831;TRINITY_DN5639_c0_g2|K13248;TRINITY_DN61812_c0_g1|K05275;TRINITY_DN62151_c0_g2|K05275;TRINITY_DN62995_c0_g1|K05275;TRINITY_DN63042_c0_g1|K00275;TRINITY_DN64817_c0_g1|K00831;TRINITY_DN64817_c0_g2|K00831;TRINITY_DN67108_c0_g1|K00275;TRINITY_DN69414_c0_g2|K01733;TRINITY_DN69414_c0_g3|K01733;TRINITY_DN70643_c1_g1|K…	TRINITY_DN15593_c0_g1|K00868;TRINITY_DN47813_c0_g2|K13248;TRINITY_DN56367_c0_g1|K00831;TRINITY_DN5639_c0_g2|K13248;TRINITY_DN61812_c0_g1|K05275;TRINITY_DN62151_c0_g2|K05275;TRINITY_DN62995_c0_g1|K05275;TRINITY_DN63042_c0_g1|K00275;TRINITY_DN64817_c0_g1|K00831;TRINITY_DN64817_c0_g2|K00831;TRINITY_DN67108_c0_g1|K00275;TRINITY_DN69414_c0_g2|K01733;TRINITY_DN69414_c0_g3|K01733;TRINITY_DN70643_c1_g1|K…	17	TRINITY_DN29759_c0_g1|K05275;TRINITY_DN29759_c0_g2|K05275;TRINITY_DN33848_c0_g1|K01733;TRINITY_DN35608_c0_g1|K08681;TRINITY_DN36555_c0_g1|K00831;TRINITY_DN48779_c0_g2|K00831;TRINITY_DN75332_c0_g1|K06215;TRINITY_DN76093_c0_g7|K06215;TRINITY_DN78018_c0_g2|K06215;TRINITY_DN81400_c2_g4|K06215;TRINITY_DN82641_c1_g2|K00831;TRINITY_DN84014_c0_g2|K06215;TRINITY_DN84014_c0_g6|K06215;TRINITY_DN86143_c3_g5|…	18	no
Folate biosynthesis	59	120	9717	21999	0.275044	0.837205	TRINITY_DN11615_c0_g1|K00287;TRINITY_DN15344_c0_g1|K00287;TRINITY_DN22519_c0_g1|K00079;TRINITY_DN36593_c0_g2|K01113;TRINITY_DN37413_c0_g1|K13950;TRINITY_DN39379_c0_g1|K01930;TRINITY_DN39379_c0_g2|K01930;TRINITY_DN43244_c0_g2|K01113;TRINITY_DN48626_c0_g2|K00011;TRINITY_DN57071_c0_g1|K00079;TRINITY_DN57350_c0_g1|K00079;TRINITY_DN63550_c0_g5|K01930;TRINITY_DN64372_c1_g2|K01113;TRINITY_DN66237_c0_g1|…	TRINITY_DN11615_c0_g1|K00287;TRINITY_DN15344_c0_g1|K00287;TRINITY_DN22519_c0_g1|K00079;TRINITY_DN36593_c0_g2|K01113;TRINITY_DN37413_c0_g1|K13950;TRINITY_DN39379_c0_g1|K01930;TRINITY_DN39379_c0_g2|K01930;TRINITY_DN43244_c0_g2|K01113;TRINITY_DN48626_c0_g2|K00011;TRINITY_DN57071_c0_g1|K00079;TRINITY_DN57350_c0_g1|K00079;TRINITY_DN63550_c0_g5|K01930;TRINITY_DN64372_c1_g2|K01113;TRINITY_DN66237_c0_g1|…	29	TRINITY_DN103500_c0_g1|K01495;TRINITY_DN1198_c0_g1|K01077;TRINITY_DN18451_c0_g1|K00079;TRINITY_DN22940_c0_g1|K00011;TRINITY_DN3408_c0_g1|K00357;TRINITY_DN36703_c0_g1|K01113;TRINITY_DN37292_c0_g3|K06897;TRINITY_DN39670_c0_g1|K01495;TRINITY_DN39989_c0_g1|K01307;TRINITY_DN39989_c0_g2|K01307;TRINITY_DN39989_c0_g3|K01307;TRINITY_DN42004_c1_g1|K01497;TRINITY_DN4985_c0_g1|K01113;TRINITY_DN56346_c0_g1|K0…	30	no
Phenylalanine metabolism	83	172	9693	21947	0.275082	0.837205	TRINITY_DN10635_c0_g1|K00838;TRINITY_DN15831_c0_g1|K00817;TRINITY_DN35542_c0_g2|K00276;TRINITY_DN35657_c0_g1|K00838;TRINITY_DN42404_c0_g1|K00457;TRINITY_DN42837_c0_g1|K00457;TRINITY_DN43848_c0_g2|K00838;TRINITY_DN44764_c0_g1|K00457;TRINITY_DN44764_c0_g4|K00457;TRINITY_DN49378_c0_g1|K01426;TRINITY_DN55996_c0_g1|K00457;TRINITY_DN56382_c0_g2|K00129;TRINITY_DN63351_c0_g1|K14454;TRINITY_DN63457_c0_g1|…	TRINITY_DN10635_c0_g1|K00838;TRINITY_DN15831_c0_g1|K00817;TRINITY_DN35542_c0_g2|K00276;TRINITY_DN35657_c0_g1|K00838;TRINITY_DN42404_c0_g1|K00457;TRINITY_DN42837_c0_g1|K00457;TRINITY_DN43848_c0_g2|K00838;TRINITY_DN44764_c0_g1|K00457;TRINITY_DN44764_c0_g4|K00457;TRINITY_DN49378_c0_g1|K01426;TRINITY_DN55996_c0_g1|K00457;TRINITY_DN56382_c0_g2|K00129;TRINITY_DN63351_c0_g1|K14454;TRINITY_DN63457_c0_g1|…	33	TRINITY_DN10302_c0_g1|K01426;TRINITY_DN10302_c0_g2|K01426;TRINITY_DN103320_c0_g1|K01426;TRINITY_DN103405_c0_g1|K00457;TRINITY_DN105262_c0_g1|K00129;TRINITY_DN22724_c0_g1|K01426;TRINITY_DN23668_c0_g1|K14455;TRINITY_DN23668_c0_g2|K14455;TRINITY_DN32397_c0_g1|K00074;TRINITY_DN33760_c0_g1|K00457;TRINITY_DN37024_c0_g1|K00457;TRINITY_DN37605_c0_g1|K00457;TRINITY_DN38814_c0_g1|K00812;TRINITY_DN39261_c1_…	50	no
Proteasome	226	488	9550	21631	0.29121	0.867435	TRINITY_DN100725_c0_g1|K02731;TRINITY_DN16181_c0_g1|K02730;TRINITY_DN19141_c0_g1|K03029;TRINITY_DN29397_c0_g2|K02729;TRINITY_DN32357_c0_g1|K02734;TRINITY_DN36274_c1_g1|K02729;TRINITY_DN44825_c0_g1|K03030;TRINITY_DN44874_c0_g1|K03035;TRINITY_DN49769_c0_g1|K02730;TRINITY_DN52370_c0_g1|K11599;TRINITY_DN63054_c0_g1|K03038;TRINITY_DN63314_c0_g1|K06698;TRINITY_DN63355_c0_g1|K10881;TRINITY_DN64539_c0_g2…	TRINITY_DN100725_c0_g1|K02731;TRINITY_DN16181_c0_g1|K02730;TRINITY_DN19141_c0_g1|K03029;TRINITY_DN29397_c0_g2|K02729;TRINITY_DN32357_c0_g1|K02734;TRINITY_DN36274_c1_g1|K02729;TRINITY_DN44825_c0_g1|K03030;TRINITY_DN44874_c0_g1|K03035;TRINITY_DN49769_c0_g1|K02730;TRINITY_DN52370_c0_g1|K11599;TRINITY_DN63054_c0_g1|K03038;TRINITY_DN63314_c0_g1|K06698;TRINITY_DN63355_c0_g1|K10881;TRINITY_DN64539_c0_g2…	96	TRINITY_DN100679_c0_g1|K11599;TRINITY_DN101668_c0_g1|K02734;TRINITY_DN101726_c0_g1|K03037;TRINITY_DN102243_c0_g1|K02726;TRINITY_DN102663_c0_g1|K02726;TRINITY_DN103053_c0_g1|K03032;TRINITY_DN103071_c0_g1|K03028;TRINITY_DN103186_c0_g1|K02734;TRINITY_DN104169_c0_g1|K02729;TRINITY_DN104759_c0_g1|K02738;TRINITY_DN105067_c0_g1|K06700;TRINITY_DN105117_c0_g1|K02728;TRINITY_DN10573_c0_g1|K02729;TRINITY_DN…	130	no
SNARE interactions in vesicular transport	64	133	9712	21986	0.31178	0.909359	TRINITY_DN102953_c0_g1|K08490;TRINITY_DN20537_c0_g1|K08488;TRINITY_DN21629_c0_g1|K08517;TRINITY_DN2945_c0_g1|K08496;TRINITY_DN33082_c0_g2|K08486;TRINITY_DN33682_c0_g1|K13504;TRINITY_DN56666_c0_g1|K08504;TRINITY_DN58162_c0_g1|K08493;TRINITY_DN58493_c0_g2|K08516;TRINITY_DN58591_c0_g1|K08515;TRINITY_DN60228_c0_g1|K08501;TRINITY_DN61191_c0_g1|K08493;TRINITY_DN62085_c0_g1|K08517;TRINITY_DN65223_c0_g1|…	TRINITY_DN102953_c0_g1|K08490;TRINITY_DN20537_c0_g1|K08488;TRINITY_DN21629_c0_g1|K08517;TRINITY_DN2945_c0_g1|K08496;TRINITY_DN33082_c0_g2|K08486;TRINITY_DN33682_c0_g1|K13504;TRINITY_DN56666_c0_g1|K08504;TRINITY_DN58162_c0_g1|K08493;TRINITY_DN58493_c0_g2|K08516;TRINITY_DN58591_c0_g1|K08515;TRINITY_DN60228_c0_g1|K08501;TRINITY_DN61191_c0_g1|K08493;TRINITY_DN62085_c0_g1|K08517;TRINITY_DN65223_c0_g1|…	25	TRINITY_DN100473_c0_g1|K08515;TRINITY_DN101069_c0_g1|K08513;TRINITY_DN101721_c0_g1|K08517;TRINITY_DN102050_c0_g1|K08513;TRINITY_DN102649_c0_g1|K08493;TRINITY_DN103024_c0_g1|K08495;TRINITY_DN104549_c0_g1|K08515;TRINITY_DN14879_c0_g1|K08502;TRINITY_DN18090_c0_g1|K08515;TRINITY_DN18307_c0_g1|K08505;TRINITY_DN21067_c0_g1|K08508;TRINITY_DN21844_c0_g1|K08490;TRINITY_DN21844_c0_g2|K08490;TRINITY_DN21909…	39	no
C5-Branched dibasic acid metabolism	15	28	9761	22091	0.325037	0.922049	TRINITY_DN22090_c0_g1|K01653;TRINITY_DN22090_c0_g2|K01653;TRINITY_DN69760_c0_g1|K01653;TRINITY_DN73345_c0_g1|K01652;TRINITY_DN73717_c1_g1|K01652;TRINITY_DN75706_c0_g5|K01653;TRINITY_DN76679_c1_g3|K01652;TRINITY_DN76679_c1_g7|K01652;TRINITY_DN84306_c0_g7|K01652;TRINITY_DN14726_c0_g1|K01653;TRINITY_DN73717_c0_g1|K01652;TRINITY_DN76679_c1_g6|K01652;TRINITY_DN84306_c0_g3|K01652;TRINITY_DN84306_c0_g5|…	TRINITY_DN22090_c0_g1|K01653;TRINITY_DN22090_c0_g2|K01653;TRINITY_DN69760_c0_g1|K01653;TRINITY_DN73345_c0_g1|K01652;TRINITY_DN73717_c1_g1|K01652;TRINITY_DN75706_c0_g5|K01653;TRINITY_DN76679_c1_g3|K01652;TRINITY_DN76679_c1_g7|K01652;TRINITY_DN84306_c0_g7|K01652	9	TRINITY_DN14726_c0_g1|K01653;TRINITY_DN73717_c0_g1|K01652;TRINITY_DN76679_c1_g6|K01652;TRINITY_DN84306_c0_g3|K01652;TRINITY_DN84306_c0_g5|K01652;TRINITY_DN84306_c0_g6|K01652	6	no
Glycerophospholipid metabolism	189	412	9587	21707	0.349054	0.922049	TRINITY_DN15733_c0_g2|K00981;TRINITY_DN21244_c0_g2|K13509;TRINITY_DN22604_c0_g1|K00993;TRINITY_DN22692_c0_g1|K13507;TRINITY_DN29700_c0_g1|K18695;TRINITY_DN31836_c0_g2|K16860;TRINITY_DN34673_c0_g1|K01115;TRINITY_DN34673_c0_g2|K01115;TRINITY_DN34851_c0_g1|K01613;TRINITY_DN35062_c0_g2|K13333;TRINITY_DN35062_c0_g3|K13333;TRINITY_DN35609_c0_g3|K01115;TRINITY_DN39051_c0_g3|K14674;TRINITY_DN42360_c0_g1|…	TRINITY_DN15733_c0_g2|K00981;TRINITY_DN21244_c0_g2|K13509;TRINITY_DN22604_c0_g1|K00993;TRINITY_DN22692_c0_g1|K13507;TRINITY_DN29700_c0_g1|K18695;TRINITY_DN31836_c0_g2|K16860;TRINITY_DN34673_c0_g1|K01115;TRINITY_DN34673_c0_g2|K01115;TRINITY_DN34851_c0_g1|K01613;TRINITY_DN35062_c0_g2|K13333;TRINITY_DN35062_c0_g3|K13333;TRINITY_DN35609_c0_g3|K01115;TRINITY_DN39051_c0_g3|K14674;TRINITY_DN42360_c0_g1|…	92	TRINITY_DN100321_c0_g1|K01613;TRINITY_DN101511_c0_g1|K16368;TRINITY_DN103260_c0_g1|K13511;TRINITY_DN11035_c0_g1|K00901;TRINITY_DN11232_c0_g1|K00999;TRINITY_DN13301_c0_g2|K00967;TRINITY_DN14673_c0_g1|K17103;TRINITY_DN15652_c0_g2|K01613;TRINITY_DN16203_c0_g1|K06130;TRINITY_DN17084_c0_g1|K01115;TRINITY_DN18546_c0_g1|K17103;TRINITY_DN18546_c0_g2|K17103;TRINITY_DN19502_c0_g1|K08730;TRINITY_DN19912_c0_…	97	no
Sphingolipid metabolism	88	188	9688	21931	0.349062	0.922049	TRINITY_DN100726_c0_g1|K00654;TRINITY_DN102751_c0_g1|K04711;TRINITY_DN20735_c0_g1|K12350;TRINITY_DN24364_c0_g1|K04713;TRINITY_DN31326_c0_g2|K04709;TRINITY_DN46696_c0_g1|K00654;TRINITY_DN52960_c0_g1|K12349;TRINITY_DN60478_c0_g1|K04711;TRINITY_DN61171_c0_g1|K01634;TRINITY_DN61171_c0_g2|K01634;TRINITY_DN61171_c0_g3|K01634;TRINITY_DN64433_c1_g1|K00654;TRINITY_DN65877_c0_g3|K12350;TRINITY_DN65877_c0_g…	TRINITY_DN100726_c0_g1|K00654;TRINITY_DN102751_c0_g1|K04711;TRINITY_DN20735_c0_g1|K12350;TRINITY_DN24364_c0_g1|K04713;TRINITY_DN31326_c0_g2|K04709;TRINITY_DN46696_c0_g1|K00654;TRINITY_DN52960_c0_g1|K12349;TRINITY_DN60478_c0_g1|K04711;TRINITY_DN61171_c0_g1|K01634;TRINITY_DN61171_c0_g2|K01634;TRINITY_DN61171_c0_g3|K01634;TRINITY_DN64433_c1_g1|K00654;TRINITY_DN65877_c0_g3|K12350;TRINITY_DN65877_c0_g…	30	TRINITY_DN102869_c0_g1|K01634;TRINITY_DN105316_c0_g1|K01134;TRINITY_DN18966_c0_g1|K00654;TRINITY_DN24541_c0_g1|K04712;TRINITY_DN26256_c0_g1|K00654;TRINITY_DN26256_c0_g2|K00654;TRINITY_DN3271_c0_g1|K12348;TRINITY_DN35508_c0_g1|K07407;TRINITY_DN37516_c0_g2|K00654;TRINITY_DN37709_c0_g1|K01634;TRINITY_DN42131_c0_g1|K00654;TRINITY_DN42963_c0_g1|K00654;TRINITY_DN43572_c0_g1|K01202;TRINITY_DN43572_c0_g3…	58	no
Steroid biosynthesis	79	168	9697	21951	0.346663	0.922049	TRINITY_DN30210_c0_g1|K07748;TRINITY_DN34382_c0_g2|K00227;TRINITY_DN39051_c0_g3|K14674;TRINITY_DN47491_c0_g5|K14674;TRINITY_DN48111_c0_g4|K07748;TRINITY_DN49376_c0_g1|K00637;TRINITY_DN56450_c0_g1|K09829;TRINITY_DN5738_c0_g1|K12298;TRINITY_DN59646_c0_g1|K00222;TRINITY_DN59646_c0_g2|K00222;TRINITY_DN60449_c0_g1|K12298;TRINITY_DN61230_c0_g2|K00637;TRINITY_DN62007_c0_g1|K00511;TRINITY_DN62007_c0_g2|K…	TRINITY_DN30210_c0_g1|K07748;TRINITY_DN34382_c0_g2|K00227;TRINITY_DN39051_c0_g3|K14674;TRINITY_DN47491_c0_g5|K14674;TRINITY_DN48111_c0_g4|K07748;TRINITY_DN49376_c0_g1|K00637;TRINITY_DN56450_c0_g1|K09829;TRINITY_DN5738_c0_g1|K12298;TRINITY_DN59646_c0_g1|K00222;TRINITY_DN59646_c0_g2|K00222;TRINITY_DN60449_c0_g1|K12298;TRINITY_DN61230_c0_g2|K00637;TRINITY_DN62007_c0_g1|K00511;TRINITY_DN62007_c0_g2|K…	36	TRINITY_DN100300_c0_g1|K09829;TRINITY_DN102699_c0_g1|K00559;TRINITY_DN103456_c0_g1|K05917;TRINITY_DN10853_c0_g1|K00559;TRINITY_DN20732_c0_g1|K00559;TRINITY_DN26218_c0_g2|K00637;TRINITY_DN32225_c0_g1|K07748;TRINITY_DN32225_c0_g2|K07748;TRINITY_DN35880_c0_g1|K07748;TRINITY_DN35880_c0_g2|K07748;TRINITY_DN40628_c0_g1|K00559;TRINITY_DN41241_c0_g1|K00637;TRINITY_DN41529_c0_g1|K00222;TRINITY_DN41529_c0_…	43	no
Arachidonic acid metabolism	48	101	9728	22018	0.368409	0.937769	TRINITY_DN100907_c0_g1|K00432;TRINITY_DN18477_c0_g1|K00432;TRINITY_DN22519_c0_g1|K00079;TRINITY_DN23552_c0_g1|K08726;TRINITY_DN23552_c0_g2|K08726;TRINITY_DN36529_c0_g1|K08726;TRINITY_DN39051_c0_g3|K14674;TRINITY_DN47491_c0_g5|K14674;TRINITY_DN55749_c1_g1|K01254;TRINITY_DN55749_c1_g2|K01254;TRINITY_DN57071_c0_g1|K00079;TRINITY_DN57350_c0_g1|K00079;TRINITY_DN65559_c0_g2|K14621;TRINITY_DN66081_c0_g1…	TRINITY_DN100907_c0_g1|K00432;TRINITY_DN18477_c0_g1|K00432;TRINITY_DN22519_c0_g1|K00079;TRINITY_DN23552_c0_g1|K08726;TRINITY_DN23552_c0_g2|K08726;TRINITY_DN36529_c0_g1|K08726;TRINITY_DN39051_c0_g3|K14674;TRINITY_DN47491_c0_g5|K14674;TRINITY_DN55749_c1_g1|K01254;TRINITY_DN55749_c1_g2|K01254;TRINITY_DN57071_c0_g1|K00079;TRINITY_DN57350_c0_g1|K00079;TRINITY_DN65559_c0_g2|K14621;TRINITY_DN66081_c0_g1…	22	TRINITY_DN13792_c0_g1|K08726;TRINITY_DN18451_c0_g1|K00079;TRINITY_DN24286_c0_g1|K14621;TRINITY_DN24436_c0_g1|K14621;TRINITY_DN33416_c0_g1|K01254;TRINITY_DN35445_c0_g1|K00081;TRINITY_DN42599_c0_g1|K14621;TRINITY_DN42599_c0_g2|K14621;TRINITY_DN53837_c0_g1|K04097;TRINITY_DN57018_c0_g1|K04097;TRINITY_DN58121_c0_g2|K14621;TRINITY_DN58121_c0_g3|K14621;TRINITY_DN59968_c0_g6|K07425;TRINITY_DN65559_c0_g3|…	26	no
Flavone and flavonol biosynthesis	3	4	9773	22115	0.367729	0.937769	TRINITY_DN3264_c0_g2|K01195;TRINITY_DN76169_c0_g1|K01195;TRINITY_DN76169_c0_g2|K01195;	.	0	TRINITY_DN3264_c0_g2|K01195;TRINITY_DN76169_c0_g1|K01195;TRINITY_DN76169_c0_g2|K01195	3	no
ABC transporters	52	162	9724	21957	0.983572	1	TRINITY_DN105038_c0_g1|K05033;TRINITY_DN38163_c0_g2|K05665;TRINITY_DN39656_c0_g1|K05663;TRINITY_DN46615_c0_g2|K08712;TRINITY_DN54401_c0_g4|K05658;TRINITY_DN57441_c0_g4|K05665;TRINITY_DN59946_c0_g1|K08712;TRINITY_DN60265_c0_g2|K05666;TRINITY_DN60448_c0_g2|K05658;TRINITY_DN62904_c1_g3|K08712;TRINITY_DN6427_c0_g1|K05658;TRINITY_DN65093_c3_g2|K05681;TRINITY_DN66002_c0_g3|K11085;TRINITY_DN67022_c0_g1|…	TRINITY_DN105038_c0_g1|K05033;TRINITY_DN38163_c0_g2|K05665;TRINITY_DN39656_c0_g1|K05663;TRINITY_DN46615_c0_g2|K08712;TRINITY_DN54401_c0_g4|K05658;TRINITY_DN57441_c0_g4|K05665;TRINITY_DN59946_c0_g1|K08712;TRINITY_DN60265_c0_g2|K05666;TRINITY_DN60448_c0_g2|K05658;TRINITY_DN62904_c1_g3|K08712;TRINITY_DN6427_c0_g1|K05658;TRINITY_DN65093_c3_g2|K05681;TRINITY_DN66002_c0_g3|K11085;TRINITY_DN67022_c0_g1|…	21	TRINITY_DN105068_c0_g1|K05666;TRINITY_DN11988_c0_g1|K08712;TRINITY_DN19447_c0_g1|K08712;TRINITY_DN29505_c0_g1|K05668;TRINITY_DN32903_c0_g2|K08711;TRINITY_DN37937_c0_g1|K05677;TRINITY_DN37937_c0_g2|K05677;TRINITY_DN37937_c0_g3|K05676;TRINITY_DN42537_c0_g3|K05661;TRINITY_DN44269_c0_g1|K05675;TRINITY_DN45685_c0_g1|K01999;TRINITY_DN50674_c0_g1|K05677;TRINITY_DN50674_c0_g2|K05677;TRINITY_DN56431_c0_g2…	31	no
alpha-Linolenic acid metabolism	46	123	9730	21996	0.854351	1	TRINITY_DN101065_c0_g1|K07513;TRINITY_DN39051_c0_g3|K14674;TRINITY_DN47491_c0_g5|K14674;TRINITY_DN50469_c0_g2|K00232;TRINITY_DN5587_c0_g1|K05894;TRINITY_DN62098_c0_g1|K07513;TRINITY_DN65559_c0_g2|K14621;TRINITY_DN66201_c0_g1|K10526;TRINITY_DN67398_c0_g1|K00232;TRINITY_DN70398_c0_g2|K16342;TRINITY_DN71538_c0_g1|K07513;TRINITY_DN75398_c0_g1|K07513;TRINITY_DN75398_c1_g1|K07513;TRINITY_DN76252_c2_g2|…	TRINITY_DN101065_c0_g1|K07513;TRINITY_DN39051_c0_g3|K14674;TRINITY_DN47491_c0_g5|K14674;TRINITY_DN50469_c0_g2|K00232;TRINITY_DN5587_c0_g1|K05894;TRINITY_DN62098_c0_g1|K07513;TRINITY_DN65559_c0_g2|K14621;TRINITY_DN66201_c0_g1|K10526;TRINITY_DN67398_c0_g1|K00232;TRINITY_DN70398_c0_g2|K16342;TRINITY_DN71538_c0_g1|K07513;TRINITY_DN75398_c0_g1|K07513;TRINITY_DN75398_c1_g1|K07513;TRINITY_DN76252_c2_g2|…	18	TRINITY_DN20817_c0_g1|K07513;TRINITY_DN24286_c0_g1|K14621;TRINITY_DN24436_c0_g1|K14621;TRINITY_DN26849_c0_g1|K07513;TRINITY_DN26849_c0_g2|K07513;TRINITY_DN33016_c0_g1|K10525;TRINITY_DN42599_c0_g1|K14621;TRINITY_DN42599_c0_g2|K14621;TRINITY_DN48131_c0_g1|K07513;TRINITY_DN54298_c1_g1|K00232;TRINITY_DN54298_c1_g2|K00232;TRINITY_DN58121_c0_g2|K14621;TRINITY_DN58121_c0_g3|K14621;TRINITY_DN59968_c0_g5|…	28	no
Aminoacyl-tRNA biosynthesis	131	449	9645	21670	0.999995	1	TRINITY_DN100460_c0_g1|K01867;TRINITY_DN15589_c0_g1|K01892;TRINITY_DN15589_c0_g2|K01892;TRINITY_DN25388_c0_g1|K01874;TRINITY_DN30412_c0_g2|K01874;TRINITY_DN30823_c0_g1|K01887;TRINITY_DN30823_c0_g3|K01887;TRINITY_DN34854_c0_g1|K01876;TRINITY_DN35667_c0_g2|K01869;TRINITY_DN35894_c0_g1|K01885;TRINITY_DN37496_c0_g1|K01870;TRINITY_DN37496_c0_g2|K01870;TRINITY_DN3761_c0_g2|K02433;TRINITY_DN40422_c0_g2|…	TRINITY_DN100460_c0_g1|K01867;TRINITY_DN15589_c0_g1|K01892;TRINITY_DN15589_c0_g2|K01892;TRINITY_DN25388_c0_g1|K01874;TRINITY_DN30412_c0_g2|K01874;TRINITY_DN30823_c0_g1|K01887;TRINITY_DN30823_c0_g3|K01887;TRINITY_DN34854_c0_g1|K01876;TRINITY_DN35667_c0_g2|K01869;TRINITY_DN35894_c0_g1|K01885;TRINITY_DN37496_c0_g1|K01870;TRINITY_DN37496_c0_g2|K01870;TRINITY_DN3761_c0_g2|K02433;TRINITY_DN40422_c0_g2|…	58	TRINITY_DN100886_c0_g1|K01881;TRINITY_DN103480_c0_g1|K01872;TRINITY_DN103521_c0_g1|K01875;TRINITY_DN19686_c0_g1|K01875;TRINITY_DN20656_c0_g1|K01893;TRINITY_DN2271_c0_g1|K01887;TRINITY_DN23281_c0_g1|K01872;TRINITY_DN24379_c0_g1|K01870;TRINITY_DN24737_c0_g1|K01875;TRINITY_DN28719_c0_g1|K04567;TRINITY_DN29279_c0_g1|K01876;TRINITY_DN36521_c0_g1|K01892;TRINITY_DN37581_c0_g2|K01866;TRINITY_DN38798_c0_g…	73	no
Ascorbate and aldarate metabolism	39	129	9737	21990	0.987058	1	TRINITY_DN51899_c0_g1|K01053;TRINITY_DN58273_c0_g2|K10047;TRINITY_DN61713_c0_g1|K00128;TRINITY_DN61713_c0_g2|K00128;TRINITY_DN69091_c1_g1|K01053;TRINITY_DN69372_c1_g1|K01053;TRINITY_DN73191_c0_g1|K19642;TRINITY_DN77048_c0_g1|K00128;TRINITY_DN77593_c0_g3|K00012;TRINITY_DN87937_c0_g1|K18981;TRINITY_DN101262_c0_g1|K01053;TRINITY_DN101648_c0_g1|K14085;TRINITY_DN15742_c0_g1|K14085;TRINITY_DN15742_c0_g…	TRINITY_DN51899_c0_g1|K01053;TRINITY_DN58273_c0_g2|K10047;TRINITY_DN61713_c0_g1|K00128;TRINITY_DN61713_c0_g2|K00128;TRINITY_DN69091_c1_g1|K01053;TRINITY_DN69372_c1_g1|K01053;TRINITY_DN73191_c0_g1|K19642;TRINITY_DN77048_c0_g1|K00128;TRINITY_DN77593_c0_g3|K00012;TRINITY_DN87937_c0_g1|K18981	10	TRINITY_DN101262_c0_g1|K01053;TRINITY_DN101648_c0_g1|K14085;TRINITY_DN15742_c0_g1|K14085;TRINITY_DN15742_c0_g2|K14085;TRINITY_DN37142_c0_g1|K14085;TRINITY_DN40529_c0_g1|K14190;TRINITY_DN43507_c0_g1|K00128;TRINITY_DN44185_c0_g2|K00128;TRINITY_DN54397_c0_g1|K17744;TRINITY_DN5500_c0_g1|K00012;TRINITY_DN5500_c0_g2|K00012;TRINITY_DN65837_c0_g1|K00128;TRINITY_DN65837_c0_g3|K00128;TRINITY_DN67262_c0_g1|…	29	no
Autophagy - other	41	202	9735	21917	1	1	TRINITY_DN52761_c0_g2|K17908;TRINITY_DN60773_c0_g3|K08269;TRINITY_DN60773_c0_g4|K08269;TRINITY_DN60773_c0_g5|K08269;TRINITY_DN62011_c0_g2|K08266;TRINITY_DN65233_c0_g7|K08342;TRINITY_DN68857_c0_g1|K08343;TRINITY_DN72550_c4_g5|K08341;TRINITY_DN76036_c0_g1|K08343;TRINITY_DN79488_c1_g1|K08269;TRINITY_DN80627_c1_g1|K04382;TRINITY_DN80723_c0_g3|K04382;TRINITY_DN80723_c0_g5|K04382;TRINITY_DN87898_c0_g1|…	TRINITY_DN52761_c0_g2|K17908;TRINITY_DN60773_c0_g3|K08269;TRINITY_DN60773_c0_g4|K08269;TRINITY_DN60773_c0_g5|K08269;TRINITY_DN62011_c0_g2|K08266;TRINITY_DN65233_c0_g7|K08342;TRINITY_DN68857_c0_g1|K08343;TRINITY_DN72550_c4_g5|K08341;TRINITY_DN76036_c0_g1|K08343;TRINITY_DN79488_c1_g1|K08269;TRINITY_DN80627_c1_g1|K04382;TRINITY_DN80723_c0_g3|K04382;TRINITY_DN80723_c0_g5|K04382;TRINITY_DN87898_c0_g1|…	15	TRINITY_DN101552_c0_g1|K08341;TRINITY_DN24823_c0_g1|K08339;TRINITY_DN26017_c0_g1|K17907;TRINITY_DN26244_c0_g1|K08343;TRINITY_DN28741_c0_g1|K00914;TRINITY_DN29822_c0_g2|K08342;TRINITY_DN37160_c0_g1|K08342;TRINITY_DN42645_c0_g1|K08343;TRINITY_DN42645_c0_g2|K08343;TRINITY_DN43974_c0_g1|K00914;TRINITY_DN46580_c0_g1|K17907;TRINITY_DN67319_c0_g1|K07204;TRINITY_DN71916_c4_g1|K04382;TRINITY_DN72550_c4_g3…	26	no
Basal transcription factors	51	192	9725	21927	0.999733	1	TRINITY_DN102277_c0_g1|K10845;TRINITY_DN104790_c0_g1|K03125;TRINITY_DN1647_c0_g1|K03127;TRINITY_DN45115_c0_g1|K14650;TRINITY_DN5138_c0_g1|K14535;TRINITY_DN54389_c0_g1|K03122;TRINITY_DN56402_c0_g1|K03133;TRINITY_DN58983_c0_g1|K03134;TRINITY_DN60142_c0_g1|K10842;TRINITY_DN65118_c0_g2|K03135;TRINITY_DN66657_c0_g2|K03141;TRINITY_DN66984_c0_g1|K03124;TRINITY_DN66984_c0_g2|K03124;TRINITY_DN67255_c0_g2|…	TRINITY_DN102277_c0_g1|K10845;TRINITY_DN104790_c0_g1|K03125;TRINITY_DN1647_c0_g1|K03127;TRINITY_DN45115_c0_g1|K14650;TRINITY_DN5138_c0_g1|K14535;TRINITY_DN54389_c0_g1|K03122;TRINITY_DN56402_c0_g1|K03133;TRINITY_DN58983_c0_g1|K03134;TRINITY_DN60142_c0_g1|K10842;TRINITY_DN65118_c0_g2|K03135;TRINITY_DN66657_c0_g2|K03141;TRINITY_DN66984_c0_g1|K03124;TRINITY_DN66984_c0_g2|K03124;TRINITY_DN67255_c0_g2|…	31	TRINITY_DN101711_c0_g1|K03134;TRINITY_DN102390_c0_g1|K03123;TRINITY_DN105299_c0_g1|K03127;TRINITY_DN24344_c0_g1|K03124;TRINITY_DN24725_c0_g1|K03124;TRINITY_DN40609_c0_g2|K03122;TRINITY_DN45287_c0_g1|K03125;TRINITY_DN47887_c0_g3|K03139;TRINITY_DN49819_c0_g1|K03125;TRINITY_DN58983_c1_g1|K03134;TRINITY_DN60898_c0_g3|K10843;TRINITY_DN75956_c0_g1|K03120;TRINITY_DN76921_c0_g6|K03120;TRINITY_DN78903_c2_…	20	no
Base excision repair	14	110	9762	22009	1	1	TRINITY_DN36914_c0_g2|K01247;TRINITY_DN41732_c0_g1|K10563;TRINITY_DN53514_c0_g1|K10773;TRINITY_DN53514_c0_g2|K10773;TRINITY_DN69393_c0_g1|K03505;TRINITY_DN74256_c2_g2|K04802;TRINITY_DN74256_c3_g1|K04802;TRINITY_DN79839_c0_g2|K02326;TRINITY_DN87267_c2_g1|K10802;TRINITY_DN94376_c0_g1|K10802;TRINITY_DN18667_c0_g1|K03648;TRINITY_DN41131_c0_g2|K10563;TRINITY_DN42420_c0_g1|K01151;TRINITY_DN42729_c0_g1|…	TRINITY_DN36914_c0_g2|K01247;TRINITY_DN41732_c0_g1|K10563;TRINITY_DN53514_c0_g1|K10773;TRINITY_DN53514_c0_g2|K10773;TRINITY_DN69393_c0_g1|K03505;TRINITY_DN74256_c2_g2|K04802;TRINITY_DN74256_c3_g1|K04802;TRINITY_DN79839_c0_g2|K02326;TRINITY_DN87267_c2_g1|K10802;TRINITY_DN94376_c0_g1|K10802	10	TRINITY_DN18667_c0_g1|K03648;TRINITY_DN41131_c0_g2|K10563;TRINITY_DN42420_c0_g1|K01151;TRINITY_DN42729_c0_g1|K01142	4	no
Biosynthesis of unsaturated fatty acids	59	145	9717	21974	0.728172	1	TRINITY_DN101065_c0_g1|K07513;TRINITY_DN23294_c0_g1|K00059;TRINITY_DN34251_c0_g1|K10251;TRINITY_DN40040_c0_g1|K10258;TRINITY_DN50212_c0_g1|K10251;TRINITY_DN50469_c0_g2|K00232;TRINITY_DN62043_c0_g2|K00059;TRINITY_DN62098_c0_g1|K07513;TRINITY_DN62132_c0_g1|K00059;TRINITY_DN64740_c0_g1|K00059;TRINITY_DN67398_c0_g1|K00232;TRINITY_DN68621_c0_g3|K00059;TRINITY_DN69497_c0_g2|K10258;TRINITY_DN69950_c1_g2…	TRINITY_DN101065_c0_g1|K07513;TRINITY_DN23294_c0_g1|K00059;TRINITY_DN34251_c0_g1|K10251;TRINITY_DN40040_c0_g1|K10258;TRINITY_DN50212_c0_g1|K10251;TRINITY_DN50469_c0_g2|K00232;TRINITY_DN62043_c0_g2|K00059;TRINITY_DN62098_c0_g1|K07513;TRINITY_DN62132_c0_g1|K00059;TRINITY_DN64740_c0_g1|K00059;TRINITY_DN67398_c0_g1|K00232;TRINITY_DN68621_c0_g3|K00059;TRINITY_DN69497_c0_g2|K10258;TRINITY_DN69950_c1_g2…	30	TRINITY_DN10743_c0_g1|K10251;TRINITY_DN14493_c0_g1|K10703;TRINITY_DN20817_c0_g1|K07513;TRINITY_DN26849_c0_g1|K07513;TRINITY_DN26849_c0_g2|K07513;TRINITY_DN30598_c0_g1|K10251;TRINITY_DN32639_c0_g1|K00059;TRINITY_DN36828_c0_g1|K10251;TRINITY_DN45748_c0_g1|K00507;TRINITY_DN48131_c0_g1|K07513;TRINITY_DN54298_c1_g1|K00232;TRINITY_DN54298_c1_g2|K00232;TRINITY_DN62148_c0_g1|K10246;TRINITY_DN62148_c0_g2|…	29	no
Biotin metabolism	22	62	9754	22057	0.842982	1	TRINITY_DN16615_c0_g2|K19562;TRINITY_DN23294_c0_g1|K00059;TRINITY_DN62043_c0_g2|K00059;TRINITY_DN62132_c0_g1|K00059;TRINITY_DN64740_c0_g1|K00059;TRINITY_DN68621_c0_g3|K00059;TRINITY_DN69950_c1_g2|K00059;TRINITY_DN72249_c0_g1|K00059;TRINITY_DN77160_c1_g2|K09458;TRINITY_DN80194_c0_g1|K00059;TRINITY_DN82652_c0_g1|K00059;TRINITY_DN84133_c1_g3|K01012;TRINITY_DN84133_c3_g1|K01012;TRINITY_DN84133_c3_g2|…	TRINITY_DN16615_c0_g2|K19562;TRINITY_DN23294_c0_g1|K00059;TRINITY_DN62043_c0_g2|K00059;TRINITY_DN62132_c0_g1|K00059;TRINITY_DN64740_c0_g1|K00059;TRINITY_DN68621_c0_g3|K00059;TRINITY_DN69950_c1_g2|K00059;TRINITY_DN72249_c0_g1|K00059;TRINITY_DN77160_c1_g2|K09458;TRINITY_DN80194_c0_g1|K00059;TRINITY_DN82652_c0_g1|K00059;TRINITY_DN84133_c1_g3|K01012;TRINITY_DN84133_c3_g1|K01012;TRINITY_DN84133_c3_g2|…	15	TRINITY_DN104813_c0_g1|K01012;TRINITY_DN14312_c0_g1|K01012;TRINITY_DN32639_c0_g1|K00059;TRINITY_DN89271_c0_g1|K00059;TRINITY_DN91937_c0_g1|K00059;TRINITY_DN93838_c0_g1|K00059;TRINITY_DN99926_c0_g1|K00059	7	no
Brassinosteroid biosynthesis	2	12	9774	22107	0.957258	1	TRINITY_DN86788_c2_g1|K09588;TRINITY_DN86788_c2_g8|K09588;	.	0	TRINITY_DN86788_c2_g1|K09588;TRINITY_DN86788_c2_g8|K09588	2	no
Caffeine metabolism	6	11	9770	22108	0.426447	1	TRINITY_DN15504_c0_g1|K00106;TRINITY_DN38682_c0_g1|K00365;TRINITY_DN65976_c0_g3|K00106;TRINITY_DN67725_c0_g1|K00365;TRINITY_DN67725_c0_g2|K00365;TRINITY_DN94836_c0_g1|K00365;	TRINITY_DN15504_c0_g1|K00106;TRINITY_DN38682_c0_g1|K00365;TRINITY_DN65976_c0_g3|K00106;TRINITY_DN67725_c0_g1|K00365;TRINITY_DN67725_c0_g2|K00365	5	TRINITY_DN94836_c0_g1|K00365	1	no
Carbapenem biosynthesis	4	11	9772	22108	0.721797	1	TRINITY_DN102680_c0_g1|K00147;TRINITY_DN63867_c0_g1|K00931;TRINITY_DN31728_c0_g1|K00147;TRINITY_DN31728_c0_g2|K00147;	TRINITY_DN102680_c0_g1|K00147;TRINITY_DN63867_c0_g1|K00931	2	TRINITY_DN31728_c0_g1|K00147;TRINITY_DN31728_c0_g2|K00147	2	no
Carotenoid biosynthesis	18	48	9758	22071	0.764513	1	TRINITY_DN10175_c0_g1|K17819;TRINITY_DN60701_c0_g3|K09840;TRINITY_DN61649_c0_g6|K17841;TRINITY_DN62345_c0_g1|K17911;TRINITY_DN69344_c0_g2|K17913;TRINITY_DN81120_c0_g6|K09839;TRINITY_DN81548_c1_g2|K17911;TRINITY_DN82822_c3_g1|K09843;TRINITY_DN86600_c2_g4|K15746;TRINITY_DN40688_c0_g1|K17819;TRINITY_DN40688_c0_g3|K17819;TRINITY_DN61649_c0_g1|K17841;TRINITY_DN61649_c0_g3|K17841;TRINITY_DN61649_c0_g7|…	TRINITY_DN10175_c0_g1|K17819;TRINITY_DN60701_c0_g3|K09840;TRINITY_DN61649_c0_g6|K17841;TRINITY_DN62345_c0_g1|K17911;TRINITY_DN69344_c0_g2|K17913;TRINITY_DN81120_c0_g6|K09839;TRINITY_DN81548_c1_g2|K17911;TRINITY_DN82822_c3_g1|K09843;TRINITY_DN86600_c2_g4|K15746	9	TRINITY_DN40688_c0_g1|K17819;TRINITY_DN40688_c0_g3|K17819;TRINITY_DN61649_c0_g1|K17841;TRINITY_DN61649_c0_g3|K17841;TRINITY_DN61649_c0_g7|K17841;TRINITY_DN62667_c0_g1|K09842;TRINITY_DN64164_c1_g7|K09842;TRINITY_DN80262_c1_g1|K09843;TRINITY_DN83478_c9_g1|K15746	9	no
Circadian rhythm - plant	9	75	9767	22044	0.999996	1	TRINITY_DN104234_c0_g1|K03115;TRINITY_DN14689_c0_g1|K03115;TRINITY_DN68272_c0_g1|K16223;TRINITY_DN7526_c0_g1|K03115;TRINITY_DN75604_c0_g6|K03097;TRINITY_DN83007_c4_g1|K03115;TRINITY_DN74062_c3_g2|K03115;TRINITY_DN75604_c0_g12|K03097;TRINITY_DN89524_c0_g1|K03115;	TRINITY_DN104234_c0_g1|K03115;TRINITY_DN14689_c0_g1|K03115;TRINITY_DN68272_c0_g1|K16223;TRINITY_DN7526_c0_g1|K03115;TRINITY_DN75604_c0_g6|K03097;TRINITY_DN83007_c4_g1|K03115	6	TRINITY_DN74062_c3_g2|K03115;TRINITY_DN75604_c0_g12|K03097;TRINITY_DN89524_c0_g1|K03115	3	no
Cutin, suberine and wax biosynthesis	12	43	9764	22076	0.945559	1	TRINITY_DN16471_c0_g1|K17991;TRINITY_DN43442_c0_g1|K15400;TRINITY_DN50602_c0_g1|K17991;TRINITY_DN58776_c0_g1|K13407;TRINITY_DN78038_c1_g1|K15400;TRINITY_DN82088_c0_g7|K15401;TRINITY_DN82810_c0_g2|K15404;TRINITY_DN84803_c0_g1|K15403;TRINITY_DN100203_c0_g1|K13407;TRINITY_DN23795_c0_g2|K15402;TRINITY_DN66648_c0_g1|K15406;TRINITY_DN80852_c1_g3|K17991;	TRINITY_DN16471_c0_g1|K17991;TRINITY_DN43442_c0_g1|K15400;TRINITY_DN50602_c0_g1|K17991;TRINITY_DN58776_c0_g1|K13407;TRINITY_DN78038_c1_g1|K15400;TRINITY_DN82088_c0_g7|K15401;TRINITY_DN82810_c0_g2|K15404;TRINITY_DN84803_c0_g1|K15403	8	TRINITY_DN100203_c0_g1|K13407;TRINITY_DN23795_c0_g2|K15402;TRINITY_DN66648_c0_g1|K15406;TRINITY_DN80852_c1_g3|K17991	4	no
Cyanoamino acid metabolism	57	158	9719	21961	0.919989	1	TRINITY_DN23717_c0_g1|K05349;TRINITY_DN33396_c0_g1|K05349;TRINITY_DN55791_c0_g2|K01188;TRINITY_DN64133_c0_g4|K05349;TRINITY_DN69750_c0_g1|K01455;TRINITY_DN70287_c0_g1|K00681;TRINITY_DN70287_c1_g1|K00681;TRINITY_DN70287_c1_g6|K00681;TRINITY_DN70287_c1_g7|K00681;TRINITY_DN70287_c1_g8|K00681;TRINITY_DN74721_c4_g1|K00600;TRINITY_DN74721_c4_g2|K00600;TRINITY_DN75274_c0_g1|K01188;TRINITY_DN75688_c1_g2|…	TRINITY_DN23717_c0_g1|K05349;TRINITY_DN33396_c0_g1|K05349;TRINITY_DN55791_c0_g2|K01188;TRINITY_DN64133_c0_g4|K05349;TRINITY_DN69750_c0_g1|K01455;TRINITY_DN70287_c0_g1|K00681;TRINITY_DN70287_c1_g1|K00681;TRINITY_DN70287_c1_g6|K00681;TRINITY_DN70287_c1_g7|K00681;TRINITY_DN70287_c1_g8|K00681;TRINITY_DN74721_c4_g1|K00600;TRINITY_DN74721_c4_g2|K00600;TRINITY_DN75274_c0_g1|K01188;TRINITY_DN75688_c1_g2|…	24	TRINITY_DN10384_c0_g1|K00681;TRINITY_DN18846_c0_g1|K05349;TRINITY_DN29599_c0_g1|K05349;TRINITY_DN34655_c0_g1|K05349;TRINITY_DN34655_c0_g2|K05349;TRINITY_DN34655_c0_g3|K05349;TRINITY_DN34655_c0_g4|K05349;TRINITY_DN36006_c0_g1|K05349;TRINITY_DN37021_c0_g3|K01501;TRINITY_DN37021_c0_g4|K01501;TRINITY_DN38075_c0_g1|K05349;TRINITY_DN47064_c0_g2|K05349;TRINITY_DN55948_c0_g1|K05349;TRINITY_DN55948_c0_g2|…	33	no
Diterpenoid biosynthesis	5	17	9771	22102	0.85111	1	TRINITY_DN78388_c1_g6|K12926;TRINITY_DN62221_c0_g2|K12922;TRINITY_DN81379_c0_g4|K04123;TRINITY_DN84810_c0_g1|K17961;TRINITY_DN91326_c0_g1|K05282;	TRINITY_DN78388_c1_g6|K12926	1	TRINITY_DN62221_c0_g2|K12922;TRINITY_DN81379_c0_g4|K04123;TRINITY_DN84810_c0_g1|K17961;TRINITY_DN91326_c0_g1|K05282	4	no
DNA replication	13	144	9763	21975	1	1	TRINITY_DN31252_c0_g1|K10739;TRINITY_DN33755_c0_g1|K10754;TRINITY_DN50988_c0_g1|K07466;TRINITY_DN52718_c0_g1|K07466;TRINITY_DN59990_c0_g1|K10739;TRINITY_DN69393_c0_g1|K03505;TRINITY_DN74256_c2_g2|K04802;TRINITY_DN74256_c3_g1|K04802;TRINITY_DN79839_c0_g2|K02326;TRINITY_DN90692_c0_g1|K03469;TRINITY_DN102389_c0_g1|K03111;TRINITY_DN22259_c0_g1|K07466;TRINITY_DN81293_c1_g9|K07466;	TRINITY_DN31252_c0_g1|K10739;TRINITY_DN33755_c0_g1|K10754;TRINITY_DN50988_c0_g1|K07466;TRINITY_DN52718_c0_g1|K07466;TRINITY_DN59990_c0_g1|K10739;TRINITY_DN69393_c0_g1|K03505;TRINITY_DN74256_c2_g2|K04802;TRINITY_DN74256_c3_g1|K04802;TRINITY_DN79839_c0_g2|K02326;TRINITY_DN90692_c0_g1|K03469	10	TRINITY_DN102389_c0_g1|K03111;TRINITY_DN22259_c0_g1|K07466;TRINITY_DN81293_c1_g9|K07466	3	no
Ether lipid metabolism	58	133	9718	21986	0.561292	1	TRINITY_DN22604_c0_g1|K00993;TRINITY_DN31836_c0_g2|K16860;TRINITY_DN34673_c0_g1|K01115;TRINITY_DN34673_c0_g2|K01115;TRINITY_DN35609_c0_g3|K01115;TRINITY_DN39051_c0_g3|K14674;TRINITY_DN47491_c0_g5|K14674;TRINITY_DN58262_c0_g1|K13519;TRINITY_DN60123_c0_g2|K01062;TRINITY_DN65559_c0_g2|K14621;TRINITY_DN67895_c0_g2|K13519;TRINITY_DN67895_c0_g4|K13519;TRINITY_DN67895_c0_g5|K13519;TRINITY_DN67895_c0_g6|…	TRINITY_DN22604_c0_g1|K00993;TRINITY_DN31836_c0_g2|K16860;TRINITY_DN34673_c0_g1|K01115;TRINITY_DN34673_c0_g2|K01115;TRINITY_DN35609_c0_g3|K01115;TRINITY_DN39051_c0_g3|K14674;TRINITY_DN47491_c0_g5|K14674;TRINITY_DN58262_c0_g1|K13519;TRINITY_DN60123_c0_g2|K01062;TRINITY_DN65559_c0_g2|K14621;TRINITY_DN67895_c0_g2|K13519;TRINITY_DN67895_c0_g4|K13519;TRINITY_DN67895_c0_g5|K13519;TRINITY_DN67895_c0_g6|…	24	TRINITY_DN15840_c0_g2|K01062;TRINITY_DN17084_c0_g1|K01115;TRINITY_DN19912_c0_g1|K16860;TRINITY_DN21402_c0_g1|K13519;TRINITY_DN21402_c0_g2|K13519;TRINITY_DN24286_c0_g1|K14621;TRINITY_DN24436_c0_g1|K14621;TRINITY_DN35993_c0_g2|K01115;TRINITY_DN35993_c0_g3|K01115;TRINITY_DN36652_c0_g1|K00993;TRINITY_DN36663_c0_g1|K06123;TRINITY_DN36663_c0_g2|K06123;TRINITY_DN37923_c0_g1|K13519;TRINITY_DN37923_c0_g2|…	34	no
Fatty acid biosynthesis	70	154	9706	21965	0.447636	1	TRINITY_DN23294_c0_g1|K00059;TRINITY_DN40820_c0_g1|K01897;TRINITY_DN44416_c0_g2|K11262;TRINITY_DN55981_c0_g1|K01897;TRINITY_DN58202_c0_g3|K11262;TRINITY_DN58202_c0_g4|K11262;TRINITY_DN62043_c0_g2|K00059;TRINITY_DN62132_c0_g1|K00059;TRINITY_DN64249_c0_g1|K00645;TRINITY_DN64740_c0_g1|K00059;TRINITY_DN66201_c0_g2|K01897;TRINITY_DN67575_c0_g1|K01897;TRINITY_DN67575_c0_g2|K01897;TRINITY_DN68621_c0_g3|…	TRINITY_DN23294_c0_g1|K00059;TRINITY_DN40820_c0_g1|K01897;TRINITY_DN44416_c0_g2|K11262;TRINITY_DN55981_c0_g1|K01897;TRINITY_DN58202_c0_g3|K11262;TRINITY_DN58202_c0_g4|K11262;TRINITY_DN62043_c0_g2|K00059;TRINITY_DN62132_c0_g1|K00059;TRINITY_DN64249_c0_g1|K00645;TRINITY_DN64740_c0_g1|K00059;TRINITY_DN66201_c0_g2|K01897;TRINITY_DN67575_c0_g1|K01897;TRINITY_DN67575_c0_g2|K01897;TRINITY_DN68621_c0_g3|…	31	TRINITY_DN100884_c0_g1|K01897;TRINITY_DN16123_c0_g1|K00645;TRINITY_DN26775_c0_g1|K01897;TRINITY_DN26775_c0_g2|K01897;TRINITY_DN28983_c0_g1|K01897;TRINITY_DN32639_c0_g1|K00059;TRINITY_DN47259_c0_g1|K01897;TRINITY_DN47259_c0_g2|K01897;TRINITY_DN47259_c0_g3|K01897;TRINITY_DN47259_c0_g4|K01897;TRINITY_DN48845_c0_g1|K01897;TRINITY_DN48845_c0_g2|K01897;TRINITY_DN48845_c0_g3|K01897;TRINITY_DN51241_c0_g2…	39	no
Fatty acid elongation	45	115	9731	22004	0.781177	1	TRINITY_DN34251_c0_g1|K10251;TRINITY_DN34593_c0_g1|K18880;TRINITY_DN40040_c0_g1|K10258;TRINITY_DN50068_c0_g1|K00022;TRINITY_DN50212_c0_g1|K10251;TRINITY_DN52270_c0_g1|K07511;TRINITY_DN59225_c0_g2|K18880;TRINITY_DN62822_c0_g1|K01074;TRINITY_DN62822_c0_g2|K01074;TRINITY_DN62822_c0_g4|K01074;TRINITY_DN65706_c0_g1|K07511;TRINITY_DN66674_c0_g1|K07512;TRINITY_DN68445_c0_g1|K01074;TRINITY_DN69497_c0_g2|…	TRINITY_DN34251_c0_g1|K10251;TRINITY_DN34593_c0_g1|K18880;TRINITY_DN40040_c0_g1|K10258;TRINITY_DN50068_c0_g1|K00022;TRINITY_DN50212_c0_g1|K10251;TRINITY_DN52270_c0_g1|K07511;TRINITY_DN59225_c0_g2|K18880;TRINITY_DN62822_c0_g1|K01074;TRINITY_DN62822_c0_g2|K01074;TRINITY_DN62822_c0_g4|K01074;TRINITY_DN65706_c0_g1|K07511;TRINITY_DN66674_c0_g1|K07512;TRINITY_DN68445_c0_g1|K01074;TRINITY_DN69497_c0_g2|…	24	TRINITY_DN103580_c0_g1|K07511;TRINITY_DN10743_c0_g1|K10251;TRINITY_DN14493_c0_g1|K10703;TRINITY_DN28908_c0_g1|K01074;TRINITY_DN30598_c0_g1|K10251;TRINITY_DN31684_c0_g1|K01074;TRINITY_DN36828_c0_g1|K10251;TRINITY_DN58918_c0_g1|K07512;TRINITY_DN59598_c0_g2|K01074;TRINITY_DN62148_c0_g1|K10246;TRINITY_DN62148_c0_g2|K10246;TRINITY_DN62148_c0_g4|K10246;TRINITY_DN7732_c0_g1|K10258;TRINITY_DN7732_c0_g2|K…	21	no
Fatty acid metabolism	156	354	9620	21765	0.529162	1	TRINITY_DN101065_c0_g1|K07513;TRINITY_DN23294_c0_g1|K00059;TRINITY_DN34251_c0_g1|K10251;TRINITY_DN40040_c0_g1|K10258;TRINITY_DN40820_c0_g1|K01897;TRINITY_DN44416_c0_g2|K11262;TRINITY_DN50068_c0_g1|K00022;TRINITY_DN50212_c0_g1|K10251;TRINITY_DN50469_c0_g2|K00232;TRINITY_DN52270_c0_g1|K07511;TRINITY_DN55981_c0_g1|K01897;TRINITY_DN58202_c0_g3|K11262;TRINITY_DN58202_c0_g4|K11262;TRINITY_DN62043_c0_g2…	TRINITY_DN101065_c0_g1|K07513;TRINITY_DN23294_c0_g1|K00059;TRINITY_DN34251_c0_g1|K10251;TRINITY_DN40040_c0_g1|K10258;TRINITY_DN40820_c0_g1|K01897;TRINITY_DN44416_c0_g2|K11262;TRINITY_DN50068_c0_g1|K00022;TRINITY_DN50212_c0_g1|K10251;TRINITY_DN50469_c0_g2|K00232;TRINITY_DN52270_c0_g1|K07511;TRINITY_DN55981_c0_g1|K01897;TRINITY_DN58202_c0_g3|K11262;TRINITY_DN58202_c0_g4|K11262;TRINITY_DN62043_c0_g2…	68	TRINITY_DN100884_c0_g1|K01897;TRINITY_DN103580_c0_g1|K07511;TRINITY_DN10743_c0_g1|K10251;TRINITY_DN14493_c0_g1|K10703;TRINITY_DN16123_c0_g1|K00645;TRINITY_DN18561_c0_g1|K00626;TRINITY_DN20817_c0_g1|K07513;TRINITY_DN26775_c0_g1|K01897;TRINITY_DN26775_c0_g2|K01897;TRINITY_DN26849_c0_g1|K07513;TRINITY_DN26849_c0_g2|K07513;TRINITY_DN28908_c0_g1|K01074;TRINITY_DN28983_c0_g1|K01897;TRINITY_DN30598_c0_g…	88	no
Flavonoid biosynthesis	6	22	9770	22097	0.900624	1	TRINITY_DN73016_c0_g1|K13065;TRINITY_DN81032_c2_g4|K13081;TRINITY_DN84824_c2_g2|K13065;TRINITY_DN85074_c1_g5|K05278;TRINITY_DN87132_c1_g2|K09754;TRINITY_DN103700_c0_g1|K13082;	TRINITY_DN73016_c0_g1|K13065;TRINITY_DN81032_c2_g4|K13081;TRINITY_DN84824_c2_g2|K13065;TRINITY_DN85074_c1_g5|K05278;TRINITY_DN87132_c1_g2|K09754	5	TRINITY_DN103700_c0_g1|K13082	1	no
Galactose metabolism	123	289	9653	21830	0.655742	1	TRINITY_DN14812_c0_g1|K01187;TRINITY_DN14812_c0_g2|K01187;TRINITY_DN19106_c0_g1|K01835;TRINITY_DN20558_c0_g1|K01835;TRINITY_DN21132_c0_g1|K18819;TRINITY_DN22008_c0_g1|K00850;TRINITY_DN33191_c0_g1|K01784|K01785;TRINITY_DN36713_c0_g1|K01084;TRINITY_DN48626_c0_g2|K00011;TRINITY_DN53180_c0_g1|K01784;TRINITY_DN53411_c1_g1|K01784;TRINITY_DN58085_c0_g1|K01193;TRINITY_DN64384_c0_g1|K01784;TRINITY_DN66235…	TRINITY_DN14812_c0_g1|K01187;TRINITY_DN14812_c0_g2|K01187;TRINITY_DN19106_c0_g1|K01835;TRINITY_DN20558_c0_g1|K01835;TRINITY_DN21132_c0_g1|K18819;TRINITY_DN22008_c0_g1|K00850;TRINITY_DN33191_c0_g1|K01784|K01785;TRINITY_DN36713_c0_g1|K01084;TRINITY_DN48626_c0_g2|K00011;TRINITY_DN53180_c0_g1|K01784;TRINITY_DN53411_c1_g1|K01784;TRINITY_DN58085_c0_g1|K01193;TRINITY_DN64384_c0_g1|K01784;TRINITY_DN66235…	43	TRINITY_DN100228_c0_g1|K01785;TRINITY_DN100457_c0_g1|K21071;TRINITY_DN11482_c0_g1|K00965;TRINITY_DN11482_c0_g2|K00965;TRINITY_DN13270_c0_g1|K01835;TRINITY_DN18363_c0_g1|K01785;TRINITY_DN22940_c0_g1|K00011;TRINITY_DN24738_c0_g1|K01785;TRINITY_DN25335_c0_g1|K01835;TRINITY_DN29130_c0_g1|K01784;TRINITY_DN29666_c0_g1|K01784;TRINITY_DN31086_c0_g1|K00963;TRINITY_DN31086_c0_g2|K00963;TRINITY_DN33970_c0_g…	80	no
Glycerolipid metabolism	140	311	9636	21808	0.445699	1	TRINITY_DN100010_c0_g1|K00863;TRINITY_DN100536_c0_g1|K18097;TRINITY_DN12115_c0_g1|K00002;TRINITY_DN21244_c0_g2|K13509;TRINITY_DN22692_c0_g1|K13507;TRINITY_DN35184_c0_g1|K00864;TRINITY_DN39051_c0_g2|K14675;TRINITY_DN39051_c0_g3|K14674;TRINITY_DN41335_c0_g1|K17900;TRINITY_DN41335_c0_g2|K17900;TRINITY_DN43007_c0_g1|K16816;TRINITY_DN44918_c0_g1|K18693;TRINITY_DN47474_c0_g1|K01054;TRINITY_DN47491_c0_g…	TRINITY_DN100010_c0_g1|K00863;TRINITY_DN100536_c0_g1|K18097;TRINITY_DN12115_c0_g1|K00002;TRINITY_DN21244_c0_g2|K13509;TRINITY_DN22692_c0_g1|K13507;TRINITY_DN35184_c0_g1|K00864;TRINITY_DN39051_c0_g2|K14675;TRINITY_DN39051_c0_g3|K14674;TRINITY_DN41335_c0_g1|K17900;TRINITY_DN41335_c0_g2|K17900;TRINITY_DN43007_c0_g1|K16816;TRINITY_DN44918_c0_g1|K18693;TRINITY_DN47474_c0_g1|K01054;TRINITY_DN47491_c0_g…	63	TRINITY_DN101648_c0_g1|K14085;TRINITY_DN102727_c0_g1|K18097;TRINITY_DN102813_c0_g1|K00679;TRINITY_DN102852_c0_g1|K00002;TRINITY_DN102986_c0_g1|K01046;TRINITY_DN11035_c0_g1|K00901;TRINITY_DN15742_c0_g1|K14085;TRINITY_DN15742_c0_g2|K14085;TRINITY_DN21402_c0_g1|K13519;TRINITY_DN21402_c0_g2|K13519;TRINITY_DN22940_c0_g1|K00011;TRINITY_DN22940_c0_g2|K00002;TRINITY_DN25147_c0_g1|K00679;TRINITY_DN25389_c…	77	no
Glycine, serine and threonine metabolism	193	467	9583	21652	0.797846	1	TRINITY_DN102364_c0_g1|K02437;TRINITY_DN15953_c0_g1|K00108;TRINITY_DN24629_c0_g2|K00872;TRINITY_DN28091_c0_g1|K15634;TRINITY_DN33719_c0_g1|K15634;TRINITY_DN35542_c0_g2|K00276;TRINITY_DN41331_c0_g1|K00306;TRINITY_DN47272_c0_g2|K01758;TRINITY_DN52394_c0_g1|K16066;TRINITY_DN55134_c0_g2|K00281;TRINITY_DN56367_c0_g1|K00831;TRINITY_DN60084_c0_g3|K01754;TRINITY_DN60426_c0_g2|K17103;TRINITY_DN61368_c0_g1…	TRINITY_DN102364_c0_g1|K02437;TRINITY_DN15953_c0_g1|K00108;TRINITY_DN24629_c0_g2|K00872;TRINITY_DN28091_c0_g1|K15634;TRINITY_DN33719_c0_g1|K15634;TRINITY_DN35542_c0_g2|K00276;TRINITY_DN41331_c0_g1|K00306;TRINITY_DN47272_c0_g2|K01758;TRINITY_DN52394_c0_g1|K16066;TRINITY_DN55134_c0_g2|K00281;TRINITY_DN56367_c0_g1|K00831;TRINITY_DN60084_c0_g3|K01754;TRINITY_DN60426_c0_g2|K17103;TRINITY_DN61368_c0_g1…	78	TRINITY_DN101648_c0_g1|K14085;TRINITY_DN102535_c0_g1|K16066;TRINITY_DN103106_c0_g1|K00108;TRINITY_DN103708_c0_g1|K01834;TRINITY_DN13050_c0_g1|K00382;TRINITY_DN14673_c0_g1|K17103;TRINITY_DN15742_c0_g1|K14085;TRINITY_DN15742_c0_g2|K14085;TRINITY_DN16275_c0_g1|K00003;TRINITY_DN18546_c0_g1|K17103;TRINITY_DN18546_c0_g2|K17103;TRINITY_DN19290_c0_g1|K15634;TRINITY_DN19536_c0_g1|K01758;TRINITY_DN20542_c0…	115	no
Glycosphingolipid biosynthesis - lacto and neolacto series	1	2	9775	22117	0.666489	1	TRINITY_DN84231_c7_g1|K01988;	.	0	TRINITY_DN84231_c7_g1|K01988	1	no
Glycosylphosphatidylinositol (GPI)-anchor biosynthesis	14	77	9762	22042	0.999754	1	TRINITY_DN101062_c0_g1|K09658;TRINITY_DN16544_c0_g1|K03857;TRINITY_DN47728_c0_g1|K05292;TRINITY_DN55090_c0_g1|K05287;TRINITY_DN58424_c2_g1|K05286;TRINITY_DN62195_c0_g2|K05291;TRINITY_DN63166_c0_g4|K05292;TRINITY_DN65888_c1_g1|K09658;TRINITY_DN100657_c0_g1|K09658;TRINITY_DN21438_c0_g1|K05291;TRINITY_DN54938_c0_g1|K05290;TRINITY_DN54938_c0_g2|K05290;TRINITY_DN56350_c0_g2|K05290;TRINITY_DN91640_c0_g…	TRINITY_DN101062_c0_g1|K09658;TRINITY_DN16544_c0_g1|K03857;TRINITY_DN47728_c0_g1|K05292;TRINITY_DN55090_c0_g1|K05287;TRINITY_DN58424_c2_g1|K05286;TRINITY_DN62195_c0_g2|K05291;TRINITY_DN63166_c0_g4|K05292;TRINITY_DN65888_c1_g1|K09658	8	TRINITY_DN100657_c0_g1|K09658;TRINITY_DN21438_c0_g1|K05291;TRINITY_DN54938_c0_g1|K05290;TRINITY_DN54938_c0_g2|K05290;TRINITY_DN56350_c0_g2|K05290;TRINITY_DN91640_c0_g1|K03434	6	no
Histidine metabolism	45	160	9731	21959	0.997924	1	TRINITY_DN11857_c0_g1|K01693;TRINITY_DN15831_c0_g1|K00817;TRINITY_DN51459_c0_g1|K20246;TRINITY_DN55835_c0_g2|K20246;TRINITY_DN56382_c0_g2|K00129;TRINITY_DN60098_c0_g2|K20246;TRINITY_DN61713_c0_g1|K00128;TRINITY_DN61713_c0_g2|K00128;TRINITY_DN62993_c0_g1|K14152;TRINITY_DN65492_c0_g1|K00129;TRINITY_DN70823_c0_g1|K01663;TRINITY_DN70823_c0_g2|K01663;TRINITY_DN72111_c1_g1|K00765;TRINITY_DN72111_c1_g2|…	TRINITY_DN11857_c0_g1|K01693;TRINITY_DN15831_c0_g1|K00817;TRINITY_DN51459_c0_g1|K20246;TRINITY_DN55835_c0_g2|K20246;TRINITY_DN56382_c0_g2|K00129;TRINITY_DN60098_c0_g2|K20246;TRINITY_DN61713_c0_g1|K00128;TRINITY_DN61713_c0_g2|K00128;TRINITY_DN62993_c0_g1|K14152;TRINITY_DN65492_c0_g1|K00129;TRINITY_DN70823_c0_g1|K01663;TRINITY_DN70823_c0_g2|K01663;TRINITY_DN72111_c1_g1|K00765;TRINITY_DN72111_c1_g2|…	17	TRINITY_DN101648_c0_g1|K14085;TRINITY_DN103325_c0_g1|K00765;TRINITY_DN105262_c0_g1|K00129;TRINITY_DN105526_c0_g1|K11182;TRINITY_DN15742_c0_g1|K14085;TRINITY_DN15742_c0_g2|K14085;TRINITY_DN37142_c0_g1|K14085;TRINITY_DN43507_c0_g1|K00128;TRINITY_DN44185_c0_g2|K00128;TRINITY_DN45543_c0_g1|K00274;TRINITY_DN50876_c0_g1|K08660;TRINITY_DN56836_c0_g1|K14152;TRINITY_DN61530_c0_g2|K00817;TRINITY_DN65837_c0…	28	no
Homologous recombination	21	135	9755	21984	1	1	TRINITY_DN105640_c0_g1|K03165;TRINITY_DN30400_c0_g1|K10866;TRINITY_DN31252_c0_g1|K10739;TRINITY_DN40230_c0_g1|K10901;TRINITY_DN50499_c0_g1|K04482;TRINITY_DN50988_c0_g1|K07466;TRINITY_DN52718_c0_g1|K07466;TRINITY_DN59990_c0_g1|K10739;TRINITY_DN60129_c0_g2|K10958;TRINITY_DN63355_c0_g1|K10881;TRINITY_DN65947_c0_g1|K10881;TRINITY_DN66960_c0_g2|K10873;TRINITY_DN69393_c0_g1|K03505;TRINITY_DN70529_c2_g5…	TRINITY_DN105640_c0_g1|K03165;TRINITY_DN30400_c0_g1|K10866;TRINITY_DN31252_c0_g1|K10739;TRINITY_DN40230_c0_g1|K10901;TRINITY_DN50499_c0_g1|K04482;TRINITY_DN50988_c0_g1|K07466;TRINITY_DN52718_c0_g1|K07466;TRINITY_DN59990_c0_g1|K10739;TRINITY_DN60129_c0_g2|K10958;TRINITY_DN63355_c0_g1|K10881;TRINITY_DN65947_c0_g1|K10881;TRINITY_DN66960_c0_g2|K10873;TRINITY_DN69393_c0_g1|K03505;TRINITY_DN70529_c2_g5…	16	TRINITY_DN102389_c0_g1|K03111;TRINITY_DN22259_c0_g1|K07466;TRINITY_DN58033_c0_g1|K08775;TRINITY_DN81293_c1_g9|K07466;TRINITY_DN88484_c0_g1|K04482	5	no
Indole alkaloid biosynthesis	5	11	9771	22108	0.572699	1	TRINITY_DN20911_c0_g1|K12694;TRINITY_DN71405_c1_g1|K08233;TRINITY_DN81241_c0_g1|K12694;TRINITY_DN83280_c2_g3|K08233;TRINITY_DN83711_c0_g1|K12698;	TRINITY_DN20911_c0_g1|K12694;TRINITY_DN71405_c1_g1|K08233;TRINITY_DN81241_c0_g1|K12694;TRINITY_DN83280_c2_g3|K08233	4	TRINITY_DN83711_c0_g1|K12698	1	no
Inositol phosphate metabolism	81	269	9695	21850	0.999308	1	TRINITY_DN34974_c0_g1|K00915;TRINITY_DN47546_c0_g4|K05858;TRINITY_DN47546_c0_g5|K05857;TRINITY_DN50205_c1_g1|K00140;TRINITY_DN51494_c0_g1|K00888;TRINITY_DN51494_c0_g2|K00888;TRINITY_DN54226_c0_g3|K03084;TRINITY_DN55987_c0_g1|K18083;TRINITY_DN58273_c0_g1|K01092;TRINITY_DN58273_c0_g2|K10047;TRINITY_DN63813_c0_g1|K19801;TRINITY_DN65609_c0_g1|K18083;TRINITY_DN67585_c0_g1|K00889;TRINITY_DN72021_c0_g1|…	TRINITY_DN34974_c0_g1|K00915;TRINITY_DN47546_c0_g4|K05858;TRINITY_DN47546_c0_g5|K05857;TRINITY_DN50205_c1_g1|K00140;TRINITY_DN51494_c0_g1|K00888;TRINITY_DN51494_c0_g2|K00888;TRINITY_DN54226_c0_g3|K03084;TRINITY_DN55987_c0_g1|K18083;TRINITY_DN58273_c0_g1|K01092;TRINITY_DN58273_c0_g2|K10047;TRINITY_DN63813_c0_g1|K19801;TRINITY_DN65609_c0_g1|K18083;TRINITY_DN67585_c0_g1|K00889;TRINITY_DN72021_c0_g1|…	29	TRINITY_DN100752_c0_g1|K01092;TRINITY_DN101842_c0_g1|K01092;TRINITY_DN10272_c0_g1|K00915;TRINITY_DN102974_c0_g1|K01110;TRINITY_DN11232_c0_g1|K00999;TRINITY_DN15848_c0_g1|K00915;TRINITY_DN19444_c0_g1|K00010;TRINITY_DN22297_c0_g1|K00889;TRINITY_DN24453_c0_g1|K00140;TRINITY_DN28741_c0_g1|K00914;TRINITY_DN28990_c0_g1|K00913;TRINITY_DN32831_c0_g1|K01858;TRINITY_DN33286_c0_g1|K01858;TRINITY_DN33655_c0_…	52	no
Linoleic acid metabolism	25	87	9751	22032	0.980655	1	TRINITY_DN39051_c0_g3|K14674;TRINITY_DN47491_c0_g5|K14674;TRINITY_DN5827_c0_g2|K07424;TRINITY_DN65559_c0_g2|K14621;TRINITY_DN67383_c0_g1|K07418;TRINITY_DN70398_c0_g2|K16342;TRINITY_DN76765_c0_g1|K00454;TRINITY_DN24286_c0_g1|K14621;TRINITY_DN24436_c0_g1|K14621;TRINITY_DN42599_c0_g1|K14621;TRINITY_DN42599_c0_g2|K14621;TRINITY_DN4484_c0_g2|K17863;TRINITY_DN58121_c0_g2|K14621;TRINITY_DN58121_c0_g3|K1…	TRINITY_DN39051_c0_g3|K14674;TRINITY_DN47491_c0_g5|K14674;TRINITY_DN5827_c0_g2|K07424;TRINITY_DN65559_c0_g2|K14621;TRINITY_DN67383_c0_g1|K07418;TRINITY_DN70398_c0_g2|K16342;TRINITY_DN76765_c0_g1|K00454	7	TRINITY_DN24286_c0_g1|K14621;TRINITY_DN24436_c0_g1|K14621;TRINITY_DN42599_c0_g1|K14621;TRINITY_DN42599_c0_g2|K14621;TRINITY_DN4484_c0_g2|K17863;TRINITY_DN58121_c0_g2|K14621;TRINITY_DN58121_c0_g3|K14621;TRINITY_DN59968_c0_g4|K15718;TRINITY_DN59968_c0_g5|K00454;TRINITY_DN65559_c0_g3|K14621;TRINITY_DN71313_c0_g2|K14674;TRINITY_DN72173_c0_g2|K00454;TRINITY_DN80633_c3_g2|K01047;TRINITY_DN82957_c0_g1|K…	18	no
Lipoic acid metabolism	4	16	9772	22103	0.903832	1	TRINITY_DN69050_c0_g2|K03644;TRINITY_DN33118_c0_g1|K03644;TRINITY_DN33118_c0_g2|K03644;TRINITY_DN88945_c0_g1|K03644;	TRINITY_DN69050_c0_g2|K03644	1	TRINITY_DN33118_c0_g1|K03644;TRINITY_DN33118_c0_g2|K03644;TRINITY_DN88945_c0_g1|K03644	3	no
Lysine degradation	105	247	9671	21872	0.650917	1	TRINITY_DN15025_c0_g1|K00825;TRINITY_DN28164_c0_g2|K00252;TRINITY_DN30955_c0_g1|K18854;TRINITY_DN3315_c0_g1|K00290;TRINITY_DN41331_c0_g1|K00306;TRINITY_DN42948_c0_g1|K00135;TRINITY_DN44329_c0_g1|K00135;TRINITY_DN44329_c0_g2|K00135;TRINITY_DN49441_c0_g2|K19199;TRINITY_DN50068_c0_g1|K00022;TRINITY_DN52270_c0_g1|K07511;TRINITY_DN52496_c0_g1|K11427;TRINITY_DN52496_c0_g2|K11427;TRINITY_DN57437_c0_g1|K…	TRINITY_DN15025_c0_g1|K00825;TRINITY_DN28164_c0_g2|K00252;TRINITY_DN30955_c0_g1|K18854;TRINITY_DN3315_c0_g1|K00290;TRINITY_DN41331_c0_g1|K00306;TRINITY_DN42948_c0_g1|K00135;TRINITY_DN44329_c0_g1|K00135;TRINITY_DN44329_c0_g2|K00135;TRINITY_DN49441_c0_g2|K19199;TRINITY_DN50068_c0_g1|K00022;TRINITY_DN52270_c0_g1|K07511;TRINITY_DN52496_c0_g1|K11427;TRINITY_DN52496_c0_g2|K11427;TRINITY_DN57437_c0_g1|K…	46	TRINITY_DN101648_c0_g1|K14085;TRINITY_DN101689_c0_g1|K00135;TRINITY_DN103580_c0_g1|K07511;TRINITY_DN14349_c0_g1|K00135;TRINITY_DN15742_c0_g1|K14085;TRINITY_DN15742_c0_g2|K14085;TRINITY_DN17447_c0_g1|K00293;TRINITY_DN18561_c0_g1|K00626;TRINITY_DN19355_c0_g2|K00135;TRINITY_DN19438_c0_g1|K11429;TRINITY_DN22885_c0_g1|K11427;TRINITY_DN30416_c0_g1|K00290;TRINITY_DN3283_c0_g1|K11422;TRINITY_DN36026_c0_g…	59	no
MAPK signaling pathway - plant	139	326	9637	21793	0.656337	1	TRINITY_DN18684_c0_g1|K00940;TRINITY_DN21715_c0_g1|K00940;TRINITY_DN45594_c0_g3|K03781;TRINITY_DN4841_c0_g1|K03781;TRINITY_DN54131_c0_g2|K03781;TRINITY_DN54131_c0_g4|K03781;TRINITY_DN58888_c1_g1|K13449;TRINITY_DN64179_c0_g1|K17686;TRINITY_DN64179_c0_g2|K17686;TRINITY_DN64179_c0_g4|K17686;TRINITY_DN66340_c0_g2|K03781;TRINITY_DN66340_c0_g3|K03781;TRINITY_DN70795_c3_g6|K02183;TRINITY_DN70865_c0_g2|K…	TRINITY_DN18684_c0_g1|K00940;TRINITY_DN21715_c0_g1|K00940;TRINITY_DN45594_c0_g3|K03781;TRINITY_DN4841_c0_g1|K03781;TRINITY_DN54131_c0_g2|K03781;TRINITY_DN54131_c0_g4|K03781;TRINITY_DN58888_c1_g1|K13449;TRINITY_DN64179_c0_g1|K17686;TRINITY_DN64179_c0_g2|K17686;TRINITY_DN64179_c0_g4|K17686;TRINITY_DN66340_c0_g2|K03781;TRINITY_DN66340_c0_g3|K03781;TRINITY_DN70795_c3_g6|K02183;TRINITY_DN70865_c0_g2|K…	39	TRINITY_DN101556_c0_g1|K02183;TRINITY_DN102311_c0_g1|K02183;TRINITY_DN103666_c0_g1|K02183;TRINITY_DN105196_c0_g1|K02183;TRINITY_DN16352_c0_g1|K00940;TRINITY_DN17863_c0_g1|K02183;TRINITY_DN24316_c0_g1|K03781;TRINITY_DN24316_c0_g2|K03781;TRINITY_DN30301_c0_g1|K13449;TRINITY_DN35281_c0_g1|K03781;TRINITY_DN37290_c0_g2|K03781;TRINITY_DN37743_c0_g1|K03781;TRINITY_DN4017_c0_g1|K14509;TRINITY_DN42161_c0_…	100	no
Mismatch repair	11	100	9765	22019	1	1	TRINITY_DN31252_c0_g1|K10739;TRINITY_DN33755_c0_g1|K10754;TRINITY_DN50988_c0_g1|K07466;TRINITY_DN52718_c0_g1|K07466;TRINITY_DN59990_c0_g1|K10739;TRINITY_DN69393_c0_g1|K03505;TRINITY_DN74256_c2_g2|K04802;TRINITY_DN74256_c3_g1|K04802;TRINITY_DN102389_c0_g1|K03111;TRINITY_DN22259_c0_g1|K07466;TRINITY_DN81293_c1_g9|K07466;	TRINITY_DN31252_c0_g1|K10739;TRINITY_DN33755_c0_g1|K10754;TRINITY_DN50988_c0_g1|K07466;TRINITY_DN52718_c0_g1|K07466;TRINITY_DN59990_c0_g1|K10739;TRINITY_DN69393_c0_g1|K03505;TRINITY_DN74256_c2_g2|K04802;TRINITY_DN74256_c3_g1|K04802	8	TRINITY_DN102389_c0_g1|K03111;TRINITY_DN22259_c0_g1|K07466;TRINITY_DN81293_c1_g9|K07466	3	no
Monobactam biosynthesis	13	35	9763	22084	0.752312	1	TRINITY_DN67557_c0_g1|K00133;TRINITY_DN69170_c0_g4|K00133;TRINITY_DN74323_c0_g1|K00958;TRINITY_DN78180_c0_g1|K00958;TRINITY_DN78180_c0_g5|K00958;TRINITY_DN46285_c0_g1|K12524;TRINITY_DN46285_c0_g2|K12524;TRINITY_DN69170_c0_g5|K00133;TRINITY_DN72189_c0_g1|K00928;TRINITY_DN74323_c0_g2|K00958;TRINITY_DN78180_c0_g4|K00958;TRINITY_DN89679_c0_g1|K00133;TRINITY_DN96908_c0_g1|K01714;	TRINITY_DN67557_c0_g1|K00133;TRINITY_DN69170_c0_g4|K00133;TRINITY_DN74323_c0_g1|K00958;TRINITY_DN78180_c0_g1|K00958;TRINITY_DN78180_c0_g5|K00958	5	TRINITY_DN46285_c0_g1|K12524;TRINITY_DN46285_c0_g2|K12524;TRINITY_DN69170_c0_g5|K00133;TRINITY_DN72189_c0_g1|K00928;TRINITY_DN74323_c0_g2|K00958;TRINITY_DN78180_c0_g4|K00958;TRINITY_DN89679_c0_g1|K00133;TRINITY_DN96908_c0_g1|K01714	8	no
Monoterpenoid biosynthesis	8	26	9768	22093	0.86283	1	TRINITY_DN62029_c0_g1|K15090;TRINITY_DN75344_c1_g1|K15099;TRINITY_DN89350_c0_g1|K15095;TRINITY_DN61152_c0_g1|K20986;TRINITY_DN77821_c0_g1|K15086;TRINITY_DN79082_c0_g5|K15099;TRINITY_DN82573_c1_g3|K15095;TRINITY_DN86220_c0_g5|K15099;	TRINITY_DN62029_c0_g1|K15090;TRINITY_DN75344_c1_g1|K15099;TRINITY_DN89350_c0_g1|K15095	3	TRINITY_DN61152_c0_g1|K20986;TRINITY_DN77821_c0_g1|K15086;TRINITY_DN79082_c0_g5|K15099;TRINITY_DN82573_c1_g3|K15095;TRINITY_DN86220_c0_g5|K15099	5	no
mRNA surveillance pathway	168	589	9608	21530	1	1	TRINITY_DN100908_c0_g1|K12881;TRINITY_DN102823_c0_g1|K14407;TRINITY_DN102992_c0_g1|K11124;TRINITY_DN105664_c0_g1|K04354;TRINITY_DN11647_c0_g1|K14396;TRINITY_DN15791_c0_g1|K14411;TRINITY_DN17756_c0_g1|K12881;TRINITY_DN22715_c0_g1|K13126;TRINITY_DN33216_c0_g1|K04354;TRINITY_DN34402_c0_g1|K14397;TRINITY_DN36317_c0_g1|K14402;TRINITY_DN42826_c0_g1|K15542;TRINITY_DN42826_c0_g2|K15542;TRINITY_DN45034_c0…	TRINITY_DN100908_c0_g1|K12881;TRINITY_DN102823_c0_g1|K14407;TRINITY_DN102992_c0_g1|K11124;TRINITY_DN105664_c0_g1|K04354;TRINITY_DN11647_c0_g1|K14396;TRINITY_DN15791_c0_g1|K14411;TRINITY_DN17756_c0_g1|K12881;TRINITY_DN22715_c0_g1|K13126;TRINITY_DN33216_c0_g1|K04354;TRINITY_DN34402_c0_g1|K14397;TRINITY_DN36317_c0_g1|K14402;TRINITY_DN42826_c0_g1|K15542;TRINITY_DN42826_c0_g2|K15542;TRINITY_DN45034_c0…	77	TRINITY_DN102032_c0_g1|K14324;TRINITY_DN102346_c0_g1|K12881;TRINITY_DN103193_c0_g1|K13126;TRINITY_DN103199_c0_g1|K03456;TRINITY_DN11986_c0_g1|K14327;TRINITY_DN15213_c0_g1|K13025;TRINITY_DN27517_c0_g1|K12877;TRINITY_DN28197_c0_g1|K14325;TRINITY_DN28970_c0_g1|K04354;TRINITY_DN29080_c0_g1|K03267;TRINITY_DN33631_c0_g2|K04354;TRINITY_DN35420_c0_g1|K13126;TRINITY_DN36392_c1_g1|K03456;TRINITY_DN37198_c0…	91	no
N-Glycan biosynthesis	66	253	9710	21866	0.999977	1	TRINITY_DN101062_c0_g1|K09658;TRINITY_DN12715_c0_g1|K03845;TRINITY_DN16521_c0_g1|K01230;TRINITY_DN19396_c0_g1|K12670;TRINITY_DN3477_c0_g1|K07441;TRINITY_DN47007_c0_g1|K12670;TRINITY_DN58549_c0_g1|K12668;TRINITY_DN59950_c0_g2|K03846;TRINITY_DN60054_c2_g2|K05546;TRINITY_DN60054_c2_g6|K05546;TRINITY_DN60484_c0_g2|K01230;TRINITY_DN60590_c0_g2|K09659;TRINITY_DN61679_c0_g2|K07252;TRINITY_DN62179_c0_g4|…	TRINITY_DN101062_c0_g1|K09658;TRINITY_DN12715_c0_g1|K03845;TRINITY_DN16521_c0_g1|K01230;TRINITY_DN19396_c0_g1|K12670;TRINITY_DN3477_c0_g1|K07441;TRINITY_DN47007_c0_g1|K12670;TRINITY_DN58549_c0_g1|K12668;TRINITY_DN59950_c0_g2|K03846;TRINITY_DN60054_c2_g2|K05546;TRINITY_DN60054_c2_g6|K05546;TRINITY_DN60484_c0_g2|K01230;TRINITY_DN60590_c0_g2|K09659;TRINITY_DN61679_c0_g2|K07252;TRINITY_DN62179_c0_g4|…	33	TRINITY_DN100124_c0_g1|K12667;TRINITY_DN100657_c0_g1|K09658;TRINITY_DN101979_c0_g1|K12667;TRINITY_DN102342_c0_g1|K12666;TRINITY_DN23984_c0_g2|K12667;TRINITY_DN29925_c0_g1|K12669;TRINITY_DN31379_c0_g1|K12670;TRINITY_DN31379_c0_g2|K12670;TRINITY_DN43240_c0_g2|K05546;TRINITY_DN47338_c0_g1|K00729;TRINITY_DN49074_c0_g2|K01230;TRINITY_DN588_c0_g1|K12666;TRINITY_DN588_c0_g2|K12666;TRINITY_DN59626_c0_g1|…	33	no
Nicotinate and nicotinamide metabolism	43	173	9733	21946	0.999867	1	TRINITY_DN41814_c0_g1|K03426;TRINITY_DN42948_c0_g1|K00135;TRINITY_DN44329_c0_g1|K00135;TRINITY_DN44329_c0_g2|K00135;TRINITY_DN44957_c0_g1|K00763;TRINITY_DN46198_c0_g1|K00767;TRINITY_DN51348_c0_g1|K03426;TRINITY_DN57666_c0_g2|K19970;TRINITY_DN57666_c0_g3|K19970;TRINITY_DN57666_c0_g6|K08693;TRINITY_DN61265_c0_g3|K00323;TRINITY_DN63917_c0_g1|K03742;TRINITY_DN65137_c0_g1|K06210;TRINITY_DN68134_c0_g1|…	TRINITY_DN41814_c0_g1|K03426;TRINITY_DN42948_c0_g1|K00135;TRINITY_DN44329_c0_g1|K00135;TRINITY_DN44329_c0_g2|K00135;TRINITY_DN44957_c0_g1|K00763;TRINITY_DN46198_c0_g1|K00767;TRINITY_DN51348_c0_g1|K03426;TRINITY_DN57666_c0_g2|K19970;TRINITY_DN57666_c0_g3|K19970;TRINITY_DN57666_c0_g6|K08693;TRINITY_DN61265_c0_g3|K00323;TRINITY_DN63917_c0_g1|K03742;TRINITY_DN65137_c0_g1|K06210;TRINITY_DN68134_c0_g1|…	22	TRINITY_DN101689_c0_g1|K00135;TRINITY_DN14349_c0_g1|K00135;TRINITY_DN19355_c0_g2|K00135;TRINITY_DN23118_c0_g1|K06210;TRINITY_DN23118_c0_g2|K06210;TRINITY_DN49142_c0_g1|K01950;TRINITY_DN49142_c0_g2|K01950;TRINITY_DN49464_c0_g2|K00858;TRINITY_DN54522_c0_g1|K03462;TRINITY_DN55475_c0_g1|K06210;TRINITY_DN55475_c0_g2|K06210;TRINITY_DN61265_c0_g6|K00323;TRINITY_DN69549_c0_g1|K00135;TRINITY_DN76081_c0_g2…	21	no
Non-homologous end-joining	1	16	9775	22103	0.998019	1	TRINITY_DN30400_c0_g1|K10866;	TRINITY_DN30400_c0_g1|K10866	1	.	0	no
Nucleotide excision repair	52	235	9724	21884	1	1	TRINITY_DN102277_c0_g1|K10845;TRINITY_DN103676_c0_g1|K03868;TRINITY_DN31252_c0_g1|K10739;TRINITY_DN33755_c0_g1|K10754;TRINITY_DN42865_c0_g1|K10847;TRINITY_DN50988_c0_g1|K07466;TRINITY_DN52718_c0_g1|K07466;TRINITY_DN59366_c1_g4|K10609;TRINITY_DN59990_c0_g1|K10739;TRINITY_DN60142_c0_g1|K10842;TRINITY_DN61202_c0_g2|K10610;TRINITY_DN64430_c0_g2|K10609;TRINITY_DN66657_c0_g2|K03141;TRINITY_DN67255_c0_g…	TRINITY_DN102277_c0_g1|K10845;TRINITY_DN103676_c0_g1|K03868;TRINITY_DN31252_c0_g1|K10739;TRINITY_DN33755_c0_g1|K10754;TRINITY_DN42865_c0_g1|K10847;TRINITY_DN50988_c0_g1|K07466;TRINITY_DN52718_c0_g1|K07466;TRINITY_DN59366_c1_g4|K10609;TRINITY_DN59990_c0_g1|K10739;TRINITY_DN60142_c0_g1|K10842;TRINITY_DN61202_c0_g2|K10610;TRINITY_DN64430_c0_g2|K10609;TRINITY_DN66657_c0_g2|K03141;TRINITY_DN67255_c0_g…	33	TRINITY_DN100156_c0_g1|K10839;TRINITY_DN17769_c0_g1|K10609;TRINITY_DN22259_c0_g1|K07466;TRINITY_DN28595_c0_g1|K10839;TRINITY_DN60898_c0_g3|K10843;TRINITY_DN72251_c4_g8|K10839;TRINITY_DN74994_c2_g4|K10839;TRINITY_DN75245_c2_g1|K03868;TRINITY_DN75245_c3_g2|K03868;TRINITY_DN75245_c3_g3|K03868;TRINITY_DN75245_c3_g4|K03868;TRINITY_DN75505_c0_g3|K03868;TRINITY_DN76898_c3_g1|K10839;TRINITY_DN76898_c3_g2…	19	no
One carbon pool by folate	46	148	9730	21971	0.986957	1	TRINITY_DN11615_c0_g1|K00287;TRINITY_DN15344_c0_g1|K00287;TRINITY_DN39179_c0_g1|K00288;TRINITY_DN41711_c0_g3|K00297;TRINITY_DN68929_c0_g1|K00602;TRINITY_DN71773_c0_g1|K00297;TRINITY_DN71773_c0_g2|K00297;TRINITY_DN72011_c0_g1|K00602;TRINITY_DN72011_c0_g2|K00602;TRINITY_DN72011_c1_g8|K00602;TRINITY_DN74467_c0_g1|K00297;TRINITY_DN74721_c4_g1|K00600;TRINITY_DN74721_c4_g2|K00600;TRINITY_DN75866_c1_g2|…	TRINITY_DN11615_c0_g1|K00287;TRINITY_DN15344_c0_g1|K00287;TRINITY_DN39179_c0_g1|K00288;TRINITY_DN41711_c0_g3|K00297;TRINITY_DN68929_c0_g1|K00602;TRINITY_DN71773_c0_g1|K00297;TRINITY_DN71773_c0_g2|K00297;TRINITY_DN72011_c0_g1|K00602;TRINITY_DN72011_c0_g2|K00602;TRINITY_DN72011_c1_g8|K00602;TRINITY_DN74467_c0_g1|K00297;TRINITY_DN74721_c4_g1|K00600;TRINITY_DN74721_c4_g2|K00600;TRINITY_DN75866_c1_g2|…	20	TRINITY_DN39935_c0_g1|K00297;TRINITY_DN39935_c0_g2|K00297;TRINITY_DN47026_c0_g1|K00548;TRINITY_DN49813_c0_g1|K00605;TRINITY_DN50589_c0_g1|K00288;TRINITY_DN50589_c0_g2|K00288;TRINITY_DN52934_c0_g1|K00602;TRINITY_DN52934_c0_g3|K00602;TRINITY_DN52934_c0_g4|K00602;TRINITY_DN63442_c0_g2|K00601;TRINITY_DN64164_c1_g5|K00600;TRINITY_DN66552_c1_g1|K00295;TRINITY_DN72011_c1_g5|K00602;TRINITY_DN72011_c1_g6|…	26	no
Other glycan degradation	31	79	9745	22040	0.744871	1	TRINITY_DN38672_c0_g1|K01191;TRINITY_DN40683_c0_g1|K01192;TRINITY_DN40683_c0_g2|K01192;TRINITY_DN61666_c0_g1|K01191;TRINITY_DN79723_c1_g3|K12311;TRINITY_DN27387_c0_g1|K12373;TRINITY_DN37233_c0_g1|K01206;TRINITY_DN44840_c0_g3|K01192;TRINITY_DN44840_c0_g5|K01192;TRINITY_DN45736_c0_g1|K12373;TRINITY_DN45736_c0_g2|K12373;TRINITY_DN48908_c0_g2|K01191;TRINITY_DN53673_c0_g1|K01192;TRINITY_DN56427_c0_g1|…	TRINITY_DN38672_c0_g1|K01191;TRINITY_DN40683_c0_g1|K01192;TRINITY_DN40683_c0_g2|K01192;TRINITY_DN61666_c0_g1|K01191;TRINITY_DN79723_c1_g3|K12311	5	TRINITY_DN27387_c0_g1|K12373;TRINITY_DN37233_c0_g1|K01206;TRINITY_DN44840_c0_g3|K01192;TRINITY_DN44840_c0_g5|K01192;TRINITY_DN45736_c0_g1|K12373;TRINITY_DN45736_c0_g2|K12373;TRINITY_DN48908_c0_g2|K01191;TRINITY_DN53673_c0_g1|K01192;TRINITY_DN56427_c0_g1|K01192;TRINITY_DN58164_c0_g2|K12373;TRINITY_DN66528_c0_g1|K12373;TRINITY_DN66528_c0_g3|K12373;TRINITY_DN69500_c0_g1|K12373;TRINITY_DN69500_c0_g2|…	26	no
Other types of O-glycan biosynthesis	33	82	9743	22037	0.707991	1	TRINITY_DN41473_c0_g2|K10967;TRINITY_DN50953_c0_g3|K00728;TRINITY_DN50953_c0_g4|K00728;TRINITY_DN68568_c4_g2|K00728;TRINITY_DN68568_c4_g9|K00728;TRINITY_DN71369_c1_g1|K13667;TRINITY_DN71704_c0_g13|K00728;TRINITY_DN71704_c0_g16|K00728;TRINITY_DN71704_c0_g8|K00728;TRINITY_DN73036_c1_g1|K00728;TRINITY_DN75692_c1_g1|K10967;TRINITY_DN76160_c6_g1|K18134;TRINITY_DN82320_c0_g2|K00728;TRINITY_DN82320_c0_g…	TRINITY_DN41473_c0_g2|K10967;TRINITY_DN50953_c0_g3|K00728;TRINITY_DN50953_c0_g4|K00728;TRINITY_DN68568_c4_g2|K00728;TRINITY_DN68568_c4_g9|K00728;TRINITY_DN71369_c1_g1|K13667;TRINITY_DN71704_c0_g13|K00728;TRINITY_DN71704_c0_g16|K00728;TRINITY_DN71704_c0_g8|K00728;TRINITY_DN73036_c1_g1|K00728;TRINITY_DN75692_c1_g1|K10967;TRINITY_DN76160_c6_g1|K18134;TRINITY_DN82320_c0_g2|K00728;TRINITY_DN82320_c0_g…	16	TRINITY_DN103638_c0_g1|K00728;TRINITY_DN26985_c0_g1|K00728;TRINITY_DN28380_c0_g2|K10967;TRINITY_DN39302_c0_g1|K00728;TRINITY_DN40042_c0_g1|K00728;TRINITY_DN44893_c0_g1|K00728;TRINITY_DN68568_c4_g1|K00728;TRINITY_DN68568_c4_g6|K00728;TRINITY_DN71704_c0_g1|K00728;TRINITY_DN71704_c0_g14|K00728;TRINITY_DN71704_c0_g17|K00728;TRINITY_DN71704_c0_g5|K00728;TRINITY_DN73036_c0_g1|K00728;TRINITY_DN73036_c0_…	17	no
Pantothenate and CoA biosynthesis	64	177	9712	21942	0.928557	1	TRINITY_DN16805_c0_g1|K01687;TRINITY_DN22090_c0_g1|K01653;TRINITY_DN22090_c0_g2|K01653;TRINITY_DN29006_c0_g1|K09680;TRINITY_DN42911_c0_g2|K09680;TRINITY_DN47163_c0_g1|K01687;TRINITY_DN58198_c0_g3|K00077;TRINITY_DN59318_c0_g1|K00859;TRINITY_DN59668_c0_g1|K00077;TRINITY_DN63491_c0_g2|K00859;TRINITY_DN63491_c0_g4|K00859;TRINITY_DN67777_c0_g2|K00826;TRINITY_DN67777_c0_g3|K00826;TRINITY_DN67835_c0_g1|…	TRINITY_DN16805_c0_g1|K01687;TRINITY_DN22090_c0_g1|K01653;TRINITY_DN22090_c0_g2|K01653;TRINITY_DN29006_c0_g1|K09680;TRINITY_DN42911_c0_g2|K09680;TRINITY_DN47163_c0_g1|K01687;TRINITY_DN58198_c0_g3|K00077;TRINITY_DN59318_c0_g1|K00859;TRINITY_DN59668_c0_g1|K00077;TRINITY_DN63491_c0_g2|K00859;TRINITY_DN63491_c0_g4|K00859;TRINITY_DN67777_c0_g2|K00826;TRINITY_DN67777_c0_g3|K00826;TRINITY_DN67835_c0_g1|…	33	TRINITY_DN100182_c0_g1|K01687;TRINITY_DN101912_c0_g1|K00207;TRINITY_DN14726_c0_g1|K01653;TRINITY_DN16931_c0_g1|K01464;TRINITY_DN22586_c0_g1|K00053;TRINITY_DN25283_c0_g1|K01687;TRINITY_DN31641_c0_g1|K00826;TRINITY_DN34289_c0_g1|K00606;TRINITY_DN34289_c0_g2|K00606;TRINITY_DN35615_c0_g1|K00207;TRINITY_DN37187_c0_g1|K09680;TRINITY_DN43267_c0_g1|K00053;TRINITY_DN48950_c0_g2|K01918;TRINITY_DN50259_c0_g…	31	no
Phenylalanine, tyrosine and tryptophan biosynthesis	86	201	9690	21918	0.621668	1	TRINITY_DN100505_c0_g1|K09484;TRINITY_DN10635_c0_g1|K00838;TRINITY_DN15831_c0_g1|K00817;TRINITY_DN24079_c0_g1|K01736;TRINITY_DN30635_c0_g1|K09484;TRINITY_DN32346_c0_g1|K09484;TRINITY_DN32346_c0_g3|K09484;TRINITY_DN35657_c0_g1|K00838;TRINITY_DN36102_c0_g1|K01657;TRINITY_DN36102_c0_g2|K01657;TRINITY_DN43848_c0_g2|K00838;TRINITY_DN49165_c0_g1|K13830;TRINITY_DN52789_c0_g1|K00211;TRINITY_DN53573_c0_g1…	TRINITY_DN100505_c0_g1|K09484;TRINITY_DN10635_c0_g1|K00838;TRINITY_DN15831_c0_g1|K00817;TRINITY_DN24079_c0_g1|K01736;TRINITY_DN30635_c0_g1|K09484;TRINITY_DN32346_c0_g1|K09484;TRINITY_DN32346_c0_g3|K09484;TRINITY_DN35657_c0_g1|K00838;TRINITY_DN36102_c0_g1|K01657;TRINITY_DN36102_c0_g2|K01657;TRINITY_DN43848_c0_g2|K00838;TRINITY_DN49165_c0_g1|K13830;TRINITY_DN52789_c0_g1|K00211;TRINITY_DN53573_c0_g1…	44	TRINITY_DN11138_c0_g1|K09484;TRINITY_DN23668_c0_g1|K14455;TRINITY_DN23668_c0_g2|K14455;TRINITY_DN2902_c0_g1|K01626;TRINITY_DN2902_c0_g2|K01626;TRINITY_DN38814_c0_g1|K00812;TRINITY_DN40047_c0_g1|K00838;TRINITY_DN40047_c0_g2|K00838;TRINITY_DN50601_c0_g1|K00812;TRINITY_DN50601_c0_g2|K00812;TRINITY_DN58766_c1_g1|K00211;TRINITY_DN59137_c0_g1|K01626;TRINITY_DN60414_c0_g1|K14454;TRINITY_DN60414_c0_g2|K1…	42	no
Phenylpropanoid biosynthesis	64	188	9712	21931	0.971929	1	TRINITY_DN23717_c0_g1|K05349;TRINITY_DN33396_c0_g1|K05349;TRINITY_DN34719_c0_g1|K11188;TRINITY_DN43542_c0_g3|K00083;TRINITY_DN55791_c0_g2|K01188;TRINITY_DN61684_c0_g2|K00430;TRINITY_DN64133_c0_g4|K05349;TRINITY_DN69137_c0_g1|K00430;TRINITY_DN70125_c0_g1|K18368;TRINITY_DN73016_c0_g1|K13065;TRINITY_DN75222_c3_g2|K00430;TRINITY_DN75274_c0_g1|K01188;TRINITY_DN75688_c1_g2|K05349;TRINITY_DN76642_c0_g4|…	TRINITY_DN23717_c0_g1|K05349;TRINITY_DN33396_c0_g1|K05349;TRINITY_DN34719_c0_g1|K11188;TRINITY_DN43542_c0_g3|K00083;TRINITY_DN55791_c0_g2|K01188;TRINITY_DN61684_c0_g2|K00430;TRINITY_DN64133_c0_g4|K05349;TRINITY_DN69137_c0_g1|K00430;TRINITY_DN70125_c0_g1|K18368;TRINITY_DN73016_c0_g1|K13065;TRINITY_DN75222_c3_g2|K00430;TRINITY_DN75274_c0_g1|K01188;TRINITY_DN75688_c1_g2|K05349;TRINITY_DN76642_c0_g4|…	29	TRINITY_DN18625_c0_g1|K09753;TRINITY_DN18846_c0_g1|K05349;TRINITY_DN28989_c0_g1|K11188;TRINITY_DN29599_c0_g1|K05349;TRINITY_DN31268_c0_g1|K00083;TRINITY_DN34655_c0_g1|K05349;TRINITY_DN34655_c0_g2|K05349;TRINITY_DN34655_c0_g3|K05349;TRINITY_DN34655_c0_g4|K05349;TRINITY_DN36006_c0_g1|K05349;TRINITY_DN38075_c0_g1|K05349;TRINITY_DN39241_c0_g1|K00430;TRINITY_DN44176_c0_g1|K10775;TRINITY_DN47064_c0_g2|…	35	no
Phosphatidylinositol signaling system	88	224	9688	21895	0.842156	1	TRINITY_DN15733_c0_g2|K00981;TRINITY_DN34974_c0_g1|K00915;TRINITY_DN47546_c0_g4|K05858;TRINITY_DN47546_c0_g5|K05857;TRINITY_DN51494_c0_g1|K00888;TRINITY_DN51494_c0_g2|K00888;TRINITY_DN54226_c0_g3|K03084;TRINITY_DN55987_c0_g1|K18083;TRINITY_DN58273_c0_g1|K01092;TRINITY_DN58273_c0_g2|K10047;TRINITY_DN63813_c0_g1|K19801;TRINITY_DN65609_c0_g1|K18083;TRINITY_DN67585_c0_g1|K00889;TRINITY_DN68397_c0_g5|…	TRINITY_DN15733_c0_g2|K00981;TRINITY_DN34974_c0_g1|K00915;TRINITY_DN47546_c0_g4|K05858;TRINITY_DN47546_c0_g5|K05857;TRINITY_DN51494_c0_g1|K00888;TRINITY_DN51494_c0_g2|K00888;TRINITY_DN54226_c0_g3|K03084;TRINITY_DN55987_c0_g1|K18083;TRINITY_DN58273_c0_g1|K01092;TRINITY_DN58273_c0_g2|K10047;TRINITY_DN63813_c0_g1|K19801;TRINITY_DN65609_c0_g1|K18083;TRINITY_DN67585_c0_g1|K00889;TRINITY_DN68397_c0_g5|…	31	TRINITY_DN100752_c0_g1|K01092;TRINITY_DN101556_c0_g1|K02183;TRINITY_DN101842_c0_g1|K01092;TRINITY_DN102311_c0_g1|K02183;TRINITY_DN10272_c0_g1|K00915;TRINITY_DN102974_c0_g1|K01110;TRINITY_DN103666_c0_g1|K02183;TRINITY_DN105196_c0_g1|K02183;TRINITY_DN11035_c0_g1|K00901;TRINITY_DN11232_c0_g1|K00999;TRINITY_DN15848_c0_g1|K00915;TRINITY_DN17863_c0_g1|K02183;TRINITY_DN22297_c0_g1|K00889;TRINITY_DN24431…	57	no
Phosphonate and phosphinate metabolism	21	44	9755	22075	0.431639	1	TRINITY_DN101742_c0_g1|K03823;TRINITY_DN12746_c0_g2|K01841;TRINITY_DN22604_c0_g1|K00993;TRINITY_DN67327_c0_g2|K12909;TRINITY_DN67327_c0_g3|K12909;TRINITY_DN71525_c0_g1|K00968;TRINITY_DN73298_c0_g2|K00993;TRINITY_DN73616_c0_g2|K00967;TRINITY_DN73616_c0_g3|K00967;TRINITY_DN75443_c2_g2|K00968;TRINITY_DN76227_c0_g2|K00968;TRINITY_DN13301_c0_g2|K00967;TRINITY_DN36652_c0_g1|K00993;TRINITY_DN4762_c0_g1|…	TRINITY_DN101742_c0_g1|K03823;TRINITY_DN12746_c0_g2|K01841;TRINITY_DN22604_c0_g1|K00993;TRINITY_DN67327_c0_g2|K12909;TRINITY_DN67327_c0_g3|K12909;TRINITY_DN71525_c0_g1|K00968;TRINITY_DN73298_c0_g2|K00993;TRINITY_DN73616_c0_g2|K00967;TRINITY_DN73616_c0_g3|K00967;TRINITY_DN75443_c2_g2|K00968;TRINITY_DN76227_c0_g2|K00968	11	TRINITY_DN13301_c0_g2|K00967;TRINITY_DN36652_c0_g1|K00993;TRINITY_DN4762_c0_g1|K00993;TRINITY_DN52192_c0_g1|K12909;TRINITY_DN58809_c0_g2|K00993;TRINITY_DN67829_c0_g1|K00993;TRINITY_DN72858_c0_g3|K00968;TRINITY_DN75443_c4_g1|K00968;TRINITY_DN76227_c0_g3|K00968;TRINITY_DN86566_c0_g1|K00967	10	no
Photosynthesis - antenna proteins	7	25	9769	22094	0.901297	1	TRINITY_DN79522_c1_g2|K08915;TRINITY_DN79902_c2_g3|K08908;TRINITY_DN81654_c0_g1|K08916;TRINITY_DN81996_c0_g2|K08911;TRINITY_DN84331_c0_g1|K08917;TRINITY_DN86262_c1_g3|K08909;TRINITY_DN74316_c1_g6|K08913;	TRINITY_DN79522_c1_g2|K08915;TRINITY_DN79902_c2_g3|K08908;TRINITY_DN81654_c0_g1|K08916;TRINITY_DN81996_c0_g2|K08911;TRINITY_DN84331_c0_g1|K08917;TRINITY_DN86262_c1_g3|K08909	6	TRINITY_DN74316_c1_g6|K08913	1	no
Photosynthesis	20	65	9756	22054	0.941672	1	TRINITY_DN59234_c0_g1|K08906;TRINITY_DN71286_c0_g1|K02698;TRINITY_DN73292_c0_g1|K02717;TRINITY_DN74702_c0_g1|K08901;TRINITY_DN77166_c3_g1|K02111;TRINITY_DN78515_c1_g3|K02699;TRINITY_DN78598_c1_g2|K02717;TRINITY_DN78655_c0_g2|K14332;TRINITY_DN79358_c0_g1|K02692;TRINITY_DN79526_c0_g4|K02639;TRINITY_DN79622_c0_g2|K08905;TRINITY_DN82065_c1_g4|K03541;TRINITY_DN85647_c0_g1|K02639;TRINITY_DN54984_c0_g1|…	TRINITY_DN59234_c0_g1|K08906;TRINITY_DN71286_c0_g1|K02698;TRINITY_DN73292_c0_g1|K02717;TRINITY_DN74702_c0_g1|K08901;TRINITY_DN77166_c3_g1|K02111;TRINITY_DN78515_c1_g3|K02699;TRINITY_DN78598_c1_g2|K02717;TRINITY_DN78655_c0_g2|K14332;TRINITY_DN79358_c0_g1|K02692;TRINITY_DN79526_c0_g4|K02639;TRINITY_DN79622_c0_g2|K08905;TRINITY_DN82065_c1_g4|K03541;TRINITY_DN85647_c0_g1|K02639	13	TRINITY_DN54984_c0_g1|K02112;TRINITY_DN72781_c4_g1|K02112;TRINITY_DN72781_c4_g2|K02112;TRINITY_DN72781_c4_g3|K02112;TRINITY_DN75957_c1_g5|K02111;TRINITY_DN7996_c0_g2|K02112;TRINITY_DN84407_c1_g1|K02112	7	no
Plant hormone signal transduction	35	267	9741	21852	1	1	TRINITY_DN104563_c0_g1|K14488;TRINITY_DN58888_c1_g1|K13449;TRINITY_DN73406_c2_g1|K14488;TRINITY_DN77582_c0_g2|K14500;TRINITY_DN77769_c2_g4|K14484;TRINITY_DN78328_c0_g1|K14484;TRINITY_DN78328_c0_g2|K14484;TRINITY_DN78601_c2_g1|K13946;TRINITY_DN78922_c2_g1|K14484;TRINITY_DN80479_c0_g2|K14492;TRINITY_DN83954_c3_g1|K14488;TRINITY_DN84328_c0_g4|K14490;TRINITY_DN84578_c0_g3|K14488;TRINITY_DN85455_c1_g6…	TRINITY_DN104563_c0_g1|K14488;TRINITY_DN58888_c1_g1|K13449;TRINITY_DN73406_c2_g1|K14488;TRINITY_DN77582_c0_g2|K14500;TRINITY_DN77769_c2_g4|K14484;TRINITY_DN78328_c0_g1|K14484;TRINITY_DN78328_c0_g2|K14484;TRINITY_DN78601_c2_g1|K13946;TRINITY_DN78922_c2_g1|K14484;TRINITY_DN80479_c0_g2|K14492;TRINITY_DN83954_c3_g1|K14488;TRINITY_DN84328_c0_g4|K14490;TRINITY_DN84578_c0_g3|K14488;TRINITY_DN85455_c1_g6…	15	TRINITY_DN30301_c0_g1|K13449;TRINITY_DN4017_c0_g1|K14509;TRINITY_DN57114_c0_g1|K13449;TRINITY_DN71981_c2_g1|K13449;TRINITY_DN73947_c0_g2|K14432;TRINITY_DN73947_c0_g3|K14432;TRINITY_DN73997_c0_g1|K14494;TRINITY_DN76765_c0_g2|K14504;TRINITY_DN77054_c0_g2|K13416;TRINITY_DN77114_c2_g4|K13464;TRINITY_DN77114_c2_g6|K13464;TRINITY_DN78751_c3_g4|K14516;TRINITY_DN78961_c3_g1|K14516;TRINITY_DN78961_c3_g8|K…	20	no
Plant-pathogen interaction	101	394	9675	21725	1	1	TRINITY_DN34593_c0_g1|K18880;TRINITY_DN35184_c0_g1|K00864;TRINITY_DN58888_c1_g1|K13449;TRINITY_DN59225_c0_g2|K18880;TRINITY_DN6061_c0_g1|K00864;TRINITY_DN6061_c0_g2|K00864;TRINITY_DN70795_c3_g6|K02183;TRINITY_DN73402_c1_g7|K04079;TRINITY_DN74287_c0_g2|K13448;TRINITY_DN74326_c3_g1|K13448;TRINITY_DN74816_c0_g2|K04079;TRINITY_DN74816_c0_g3|K04079;TRINITY_DN74816_c0_g4|K04079;TRINITY_DN76421_c2_g1|K0…	TRINITY_DN34593_c0_g1|K18880;TRINITY_DN35184_c0_g1|K00864;TRINITY_DN58888_c1_g1|K13449;TRINITY_DN59225_c0_g2|K18880;TRINITY_DN6061_c0_g1|K00864;TRINITY_DN6061_c0_g2|K00864;TRINITY_DN70795_c3_g6|K02183;TRINITY_DN73402_c1_g7|K04079;TRINITY_DN74287_c0_g2|K13448;TRINITY_DN74326_c3_g1|K13448;TRINITY_DN74816_c0_g2|K04079;TRINITY_DN74816_c0_g3|K04079;TRINITY_DN74816_c0_g4|K04079;TRINITY_DN76421_c2_g1|K0…	32	TRINITY_DN101556_c0_g1|K02183;TRINITY_DN102311_c0_g1|K02183;TRINITY_DN103666_c0_g1|K02183;TRINITY_DN105196_c0_g1|K02183;TRINITY_DN15422_c0_g1|K12795;TRINITY_DN17863_c0_g1|K02183;TRINITY_DN26920_c0_g1|K09487;TRINITY_DN30301_c0_g1|K13449;TRINITY_DN4517_c0_g1|K09487;TRINITY_DN46843_c0_g1|K12795;TRINITY_DN46843_c0_g2|K12795;TRINITY_DN51179_c0_g1|K13420;TRINITY_DN53491_c0_g1|K13448;TRINITY_DN55154_c0_…	69	no
Porphyrin and chlorophyll metabolism	51	182	9725	21937	0.998932	1	TRINITY_DN22294_c0_g1|K01764;TRINITY_DN29167_c0_g2|K00589;TRINITY_DN30607_c0_g1|K00231;TRINITY_DN30607_c0_g2|K00231;TRINITY_DN35894_c0_g1|K01885;TRINITY_DN44881_c0_g1|K01764;TRINITY_DN51260_c0_g1|K01772;TRINITY_DN52527_c0_g2|K00589;TRINITY_DN61044_c0_g1|K02257;TRINITY_DN61894_c0_g2|K00231;TRINITY_DN61894_c0_g3|K00231;TRINITY_DN62040_c0_g1|K02304;TRINITY_DN65008_c0_g1|K01698;TRINITY_DN65130_c0_g1|…	TRINITY_DN22294_c0_g1|K01764;TRINITY_DN29167_c0_g2|K00589;TRINITY_DN30607_c0_g1|K00231;TRINITY_DN30607_c0_g2|K00231;TRINITY_DN35894_c0_g1|K01885;TRINITY_DN44881_c0_g1|K01764;TRINITY_DN51260_c0_g1|K01772;TRINITY_DN52527_c0_g2|K00589;TRINITY_DN61044_c0_g1|K02257;TRINITY_DN61894_c0_g2|K00231;TRINITY_DN61894_c0_g3|K00231;TRINITY_DN62040_c0_g1|K02304;TRINITY_DN65008_c0_g1|K01698;TRINITY_DN65130_c0_g1|…	30	TRINITY_DN18534_c0_g1|K01698;TRINITY_DN18534_c0_g2|K01698;TRINITY_DN20106_c0_g1|K01772;TRINITY_DN24203_c0_g1|K02304;TRINITY_DN3264_c0_g2|K01195;TRINITY_DN40075_c0_g2|K01885;TRINITY_DN57269_c0_g1|K01764;TRINITY_DN71062_c0_g3|K01698;TRINITY_DN72089_c0_g3|K01764;TRINITY_DN76169_c0_g1|K01195;TRINITY_DN76169_c0_g2|K01195;TRINITY_DN76767_c0_g1|K01885;TRINITY_DN76767_c0_g2|K01885;TRINITY_DN78627_c2_g2|K…	21	no
Propanoate metabolism	121	269	9655	21850	0.454915	1	TRINITY_DN24790_c0_g1|K09699;TRINITY_DN24790_c0_g2|K09699;TRINITY_DN32022_c0_g1|K05605;TRINITY_DN32022_c0_g3|K05605;TRINITY_DN38186_c0_g2|K00167;TRINITY_DN44416_c0_g2|K11262;TRINITY_DN50205_c1_g1|K00140;TRINITY_DN52270_c0_g1|K07511;TRINITY_DN58202_c0_g3|K11262;TRINITY_DN58202_c0_g4|K11262;TRINITY_DN62980_c1_g1|K05605;TRINITY_DN65706_c0_g1|K07511;TRINITY_DN67343_c1_g2|K00626;TRINITY_DN68506_c0_g2|…	TRINITY_DN24790_c0_g1|K09699;TRINITY_DN24790_c0_g2|K09699;TRINITY_DN32022_c0_g1|K05605;TRINITY_DN32022_c0_g3|K05605;TRINITY_DN38186_c0_g2|K00167;TRINITY_DN44416_c0_g2|K11262;TRINITY_DN50205_c1_g1|K00140;TRINITY_DN52270_c0_g1|K07511;TRINITY_DN58202_c0_g3|K11262;TRINITY_DN58202_c0_g4|K11262;TRINITY_DN62980_c1_g1|K05605;TRINITY_DN65706_c0_g1|K07511;TRINITY_DN67343_c1_g2|K00626;TRINITY_DN68506_c0_g2|…	41	TRINITY_DN100633_c0_g1|K01895;TRINITY_DN101506_c0_g1|K01965;TRINITY_DN103030_c0_g1|K01899;TRINITY_DN103038_c0_g1|K00166;TRINITY_DN103580_c0_g1|K07511;TRINITY_DN13050_c0_g1|K00382;TRINITY_DN18561_c0_g1|K00626;TRINITY_DN24453_c0_g1|K00140;TRINITY_DN29067_c0_g2|K01847;TRINITY_DN31295_c1_g1|K01847;TRINITY_DN32958_c0_g2|K05605;TRINITY_DN38224_c0_g1|K01965;TRINITY_DN38224_c0_g2|K01965;TRINITY_DN39071_c…	80	no
Protein export	96	214	9680	21905	0.473046	1	TRINITY_DN11359_c0_g1|K03105;TRINITY_DN23748_c0_g1|K03106;TRINITY_DN24768_c0_g1|K09647;TRINITY_DN34842_c0_g1|K09540;TRINITY_DN35373_c0_g1|K09540;TRINITY_DN37143_c0_g3|K09540;TRINITY_DN37927_c0_g1|K03104;TRINITY_DN39043_c0_g1|K13431;TRINITY_DN39043_c0_g2|K13431;TRINITY_DN51132_c0_g1|K07342;TRINITY_DN58055_c0_g1|K03105;TRINITY_DN62285_c0_g1|K12946;TRINITY_DN63303_c0_g1|K12272;TRINITY_DN64072_c0_g1|…	TRINITY_DN11359_c0_g1|K03105;TRINITY_DN23748_c0_g1|K03106;TRINITY_DN24768_c0_g1|K09647;TRINITY_DN34842_c0_g1|K09540;TRINITY_DN35373_c0_g1|K09540;TRINITY_DN37143_c0_g3|K09540;TRINITY_DN37927_c0_g1|K03104;TRINITY_DN39043_c0_g1|K13431;TRINITY_DN39043_c0_g2|K13431;TRINITY_DN51132_c0_g1|K07342;TRINITY_DN58055_c0_g1|K03105;TRINITY_DN62285_c0_g1|K12946;TRINITY_DN63303_c0_g1|K12272;TRINITY_DN64072_c0_g1|…	45	TRINITY_DN100967_c0_g1|K13280;TRINITY_DN101277_c0_g1|K12948;TRINITY_DN103378_c0_g1|K07342;TRINITY_DN104839_c0_g1|K13280;TRINITY_DN29956_c0_g1|K10956;TRINITY_DN40308_c0_g1|K09490;TRINITY_DN49371_c0_g1|K12275;TRINITY_DN49371_c0_g2|K12275;TRINITY_DN55881_c0_g2|K03106;TRINITY_DN72251_c1_g1|K09648;TRINITY_DN72499_c0_g1|K09481;TRINITY_DN73712_c0_g1|K03108;TRINITY_DN74966_c2_g3|K10956;TRINITY_DN74966_c2…	51	no
Purine metabolism	288	833	9488	21286	0.999913	1	TRINITY_DN102084_c0_g1|K03007;TRINITY_DN104209_c0_g1|K01483;TRINITY_DN104333_c0_g1|K03017;TRINITY_DN105329_c0_g1|K00873;TRINITY_DN15504_c0_g1|K00106;TRINITY_DN16191_c0_g1|K00939;TRINITY_DN18684_c0_g1|K00940;TRINITY_DN19106_c0_g1|K01835;TRINITY_DN19153_c0_g1|K01522;TRINITY_DN20558_c0_g1|K01835;TRINITY_DN20886_c0_g1|K03010;TRINITY_DN21715_c0_g1|K00940;TRINITY_DN22747_c0_g1|K03022;TRINITY_DN24089_c0…	TRINITY_DN102084_c0_g1|K03007;TRINITY_DN104209_c0_g1|K01483;TRINITY_DN104333_c0_g1|K03017;TRINITY_DN105329_c0_g1|K00873;TRINITY_DN15504_c0_g1|K00106;TRINITY_DN16191_c0_g1|K00939;TRINITY_DN18684_c0_g1|K00940;TRINITY_DN19106_c0_g1|K01835;TRINITY_DN19153_c0_g1|K01522;TRINITY_DN20558_c0_g1|K01835;TRINITY_DN20886_c0_g1|K03010;TRINITY_DN21715_c0_g1|K00940;TRINITY_DN22747_c0_g1|K03022;TRINITY_DN24089_c0…	132	TRINITY_DN101000_c0_g1|K00088;TRINITY_DN101010_c0_g1|K13987;TRINITY_DN1010_c0_g1|K03008;TRINITY_DN101349_c0_g1|K03017;TRINITY_DN102572_c0_g1|K03023;TRINITY_DN102951_c0_g1|K00939;TRINITY_DN103574_c0_g1|K00939;TRINITY_DN104283_c0_g1|K00759;TRINITY_DN10856_c0_g1|K07127;TRINITY_DN12380_c0_g1|K03011;TRINITY_DN13270_c0_g1|K01835;TRINITY_DN14329_c0_g1|K03007;TRINITY_DN15528_c0_g1|K00873;TRINITY_DN16352_…	156	no
Pyrimidine metabolism	179	584	9597	21535	0.999997	1	TRINITY_DN102084_c0_g1|K03007;TRINITY_DN102957_c0_g1|K09023;TRINITY_DN104333_c0_g1|K03017;TRINITY_DN18684_c0_g1|K00940;TRINITY_DN20886_c0_g1|K03010;TRINITY_DN21715_c0_g1|K00940;TRINITY_DN22747_c0_g1|K03022;TRINITY_DN30939_c0_g1|K03025;TRINITY_DN39230_c0_g1|K00876;TRINITY_DN39230_c0_g2|K00876;TRINITY_DN43826_c0_g1|K03027;TRINITY_DN43826_c0_g2|K03027;TRINITY_DN44324_c0_g1|K03015;TRINITY_DN44871_c0_…	TRINITY_DN102084_c0_g1|K03007;TRINITY_DN102957_c0_g1|K09023;TRINITY_DN104333_c0_g1|K03017;TRINITY_DN18684_c0_g1|K00940;TRINITY_DN20886_c0_g1|K03010;TRINITY_DN21715_c0_g1|K00940;TRINITY_DN22747_c0_g1|K03022;TRINITY_DN30939_c0_g1|K03025;TRINITY_DN39230_c0_g1|K00876;TRINITY_DN39230_c0_g2|K00876;TRINITY_DN43826_c0_g1|K03027;TRINITY_DN43826_c0_g2|K03027;TRINITY_DN44324_c0_g1|K03015;TRINITY_DN44871_c0_…	81	TRINITY_DN1010_c0_g1|K03008;TRINITY_DN101349_c0_g1|K03017;TRINITY_DN101912_c0_g1|K00207;TRINITY_DN102535_c0_g1|K16066;TRINITY_DN102572_c0_g1|K03023;TRINITY_DN104391_c0_g1|K09020;TRINITY_DN105424_c0_g1|K16330;TRINITY_DN12339_c0_g2|K00761;TRINITY_DN12380_c0_g1|K03011;TRINITY_DN14329_c0_g1|K03007;TRINITY_DN16352_c0_g1|K00940;TRINITY_DN16931_c0_g1|K01464;TRINITY_DN19169_c0_g1|K03017;TRINITY_DN22545_c…	98	no
Riboflavin metabolism	42	94	9734	22025	0.50896	1	TRINITY_DN25140_c0_g1|K00794;TRINITY_DN32867_c0_g1|K14394;TRINITY_DN33925_c0_g1|K01078;TRINITY_DN43444_c0_g2|K14655;TRINITY_DN50986_c0_g3|K00953;TRINITY_DN511_c0_g1|K00793;TRINITY_DN60401_c0_g1|K00953;TRINITY_DN60401_c1_g1|K00953;TRINITY_DN6105_c0_g1|K14655;TRINITY_DN62125_c0_g1|K00793;TRINITY_DN67450_c0_g2|K00794;TRINITY_DN68546_c0_g1|K01078;TRINITY_DN6870_c0_g1|K14655;TRINITY_DN69663_c0_g1|K010…	TRINITY_DN25140_c0_g1|K00794;TRINITY_DN32867_c0_g1|K14394;TRINITY_DN33925_c0_g1|K01078;TRINITY_DN43444_c0_g2|K14655;TRINITY_DN50986_c0_g3|K00953;TRINITY_DN511_c0_g1|K00793;TRINITY_DN60401_c0_g1|K00953;TRINITY_DN60401_c1_g1|K00953;TRINITY_DN6105_c0_g1|K14655;TRINITY_DN62125_c0_g1|K00793;TRINITY_DN67450_c0_g2|K00794;TRINITY_DN68546_c0_g1|K01078;TRINITY_DN6870_c0_g1|K14655;TRINITY_DN69663_c0_g1|K010…	22	TRINITY_DN101876_c0_g1|K02858;TRINITY_DN103503_c0_g1|K00793;TRINITY_DN14919_c0_g1|K00794;TRINITY_DN16104_c0_g1|K00953;TRINITY_DN30436_c0_g1|K14379;TRINITY_DN30436_c0_g2|K14379;TRINITY_DN3367_c0_g1|K01078;TRINITY_DN36331_c0_g2|K00953;TRINITY_DN36331_c0_g3|K00953;TRINITY_DN38968_c0_g2|K01078;TRINITY_DN42004_c1_g1|K01497;TRINITY_DN51392_c0_g1|K14379;TRINITY_DN5756_c0_g1|K14410;TRINITY_DN59421_c0_g1|…	20	no
Ribosome biogenesis in eukaryotes	235	685	9541	21434	0.999767	1	TRINITY_DN100669_c0_g1|K14561;TRINITY_DN104134_c0_g1|K07936;TRINITY_DN104167_c0_g1|K14556;TRINITY_DN104234_c0_g1|K03115;TRINITY_DN104364_c0_g1|K03537;TRINITY_DN14689_c0_g1|K03115;TRINITY_DN20330_c0_g1|K07562;TRINITY_DN20330_c0_g2|K07562;TRINITY_DN20929_c0_g1|K11129;TRINITY_DN24833_c0_g1|K14538;TRINITY_DN27311_c0_g1|K03264;TRINITY_DN34568_c0_g1|K07178;TRINITY_DN36301_c0_g1|K14559;TRINITY_DN42367_c…	TRINITY_DN100669_c0_g1|K14561;TRINITY_DN104134_c0_g1|K07936;TRINITY_DN104167_c0_g1|K14556;TRINITY_DN104234_c0_g1|K03115;TRINITY_DN104364_c0_g1|K03537;TRINITY_DN14689_c0_g1|K03115;TRINITY_DN20330_c0_g1|K07562;TRINITY_DN20330_c0_g2|K07562;TRINITY_DN20929_c0_g1|K11129;TRINITY_DN24833_c0_g1|K14538;TRINITY_DN27311_c0_g1|K03264;TRINITY_DN34568_c0_g1|K07178;TRINITY_DN36301_c0_g1|K14559;TRINITY_DN42367_c…	103	TRINITY_DN100816_c0_g1|K11128;TRINITY_DN100962_c0_g1|K03685;TRINITY_DN101394_c0_g1|K12619;TRINITY_DN102038_c0_g1|K14568;TRINITY_DN104524_c0_g1|K14574;TRINITY_DN105010_c0_g1|K14290;TRINITY_DN11413_c0_g1|K12845;TRINITY_DN11722_c0_g1|K12845;TRINITY_DN12861_c0_g1|K14544;TRINITY_DN19902_c0_g1|K03685;TRINITY_DN20158_c0_g1|K14568;TRINITY_DN20283_c0_g1|K14564;TRINITY_DN20574_c0_g1|K11128;TRINITY_DN22578_…	132	no
RNA degradation	149	622	9627	21497	1	1	TRINITY_DN102081_c0_g1|K12572;TRINITY_DN13635_c0_g1|K12625;TRINITY_DN15198_c0_g1|K12626;TRINITY_DN21778_c0_g1|K12591;TRINITY_DN22008_c0_g1|K00850;TRINITY_DN22715_c0_g1|K13126;TRINITY_DN25426_c0_g1|K12601;TRINITY_DN30398_c0_g2|K07573;TRINITY_DN30642_c0_g1|K12622;TRINITY_DN34689_c0_g2|K03514;TRINITY_DN36671_c0_g1|K12599;TRINITY_DN37463_c0_g1|K12614;TRINITY_DN41376_c0_g1|K12580;TRINITY_DN44098_c0_g1…	TRINITY_DN102081_c0_g1|K12572;TRINITY_DN13635_c0_g1|K12625;TRINITY_DN15198_c0_g1|K12626;TRINITY_DN21778_c0_g1|K12591;TRINITY_DN22008_c0_g1|K00850;TRINITY_DN22715_c0_g1|K13126;TRINITY_DN25426_c0_g1|K12601;TRINITY_DN30398_c0_g2|K07573;TRINITY_DN30642_c0_g1|K12622;TRINITY_DN34689_c0_g2|K03514;TRINITY_DN36671_c0_g1|K12599;TRINITY_DN37463_c0_g1|K12614;TRINITY_DN41376_c0_g1|K12580;TRINITY_DN44098_c0_g1…	74	TRINITY_DN100984_c0_g1|K12590;TRINITY_DN101394_c0_g1|K12619;TRINITY_DN103193_c0_g1|K13126;TRINITY_DN11030_c0_g1|K12598;TRINITY_DN16064_c0_g1|K12622;TRINITY_DN21139_c0_g1|K01689;TRINITY_DN24818_c0_g1|K12598;TRINITY_DN24858_c0_g1|K03678;TRINITY_DN29355_c0_g1|K12580;TRINITY_DN31544_c0_g2|K12602;TRINITY_DN31890_c0_g1|K04043;TRINITY_DN35420_c0_g1|K13126;TRINITY_DN35896_c0_g1|K12620;TRINITY_DN35896_c0_…	75	no
RNA polymerase	75	251	9701	21868	0.999172	1	TRINITY_DN102084_c0_g1|K03007;TRINITY_DN104333_c0_g1|K03017;TRINITY_DN20886_c0_g1|K03010;TRINITY_DN22747_c0_g1|K03022;TRINITY_DN30939_c0_g1|K03025;TRINITY_DN43826_c0_g1|K03027;TRINITY_DN43826_c0_g2|K03027;TRINITY_DN44324_c0_g1|K03015;TRINITY_DN44871_c0_g2|K03018;TRINITY_DN44871_c0_g4|K03018;TRINITY_DN45557_c0_g1|K03002;TRINITY_DN46234_c0_g3|K02999;TRINITY_DN55330_c0_g2|K03023;TRINITY_DN57633_c0_g…	TRINITY_DN102084_c0_g1|K03007;TRINITY_DN104333_c0_g1|K03017;TRINITY_DN20886_c0_g1|K03010;TRINITY_DN22747_c0_g1|K03022;TRINITY_DN30939_c0_g1|K03025;TRINITY_DN43826_c0_g1|K03027;TRINITY_DN43826_c0_g2|K03027;TRINITY_DN44324_c0_g1|K03015;TRINITY_DN44871_c0_g2|K03018;TRINITY_DN44871_c0_g4|K03018;TRINITY_DN45557_c0_g1|K03002;TRINITY_DN46234_c0_g3|K02999;TRINITY_DN55330_c0_g2|K03023;TRINITY_DN57633_c0_g…	40	TRINITY_DN1010_c0_g1|K03008;TRINITY_DN101349_c0_g1|K03017;TRINITY_DN102572_c0_g1|K03023;TRINITY_DN12380_c0_g1|K03011;TRINITY_DN14329_c0_g1|K03007;TRINITY_DN19169_c0_g1|K03017;TRINITY_DN23272_c0_g1|K03002;TRINITY_DN30509_c0_g1|K03006;TRINITY_DN31265_c0_g2|K03000;TRINITY_DN40864_c0_g1|K03006;TRINITY_DN41220_c0_g1|K03027;TRINITY_DN41220_c0_g2|K03027;TRINITY_DN43955_c0_g1|K03013;TRINITY_DN56507_c0_g2…	35	no
RNA transport	435	1034	9341	21085	0.819224	1	TRINITY_DN100908_c0_g1|K12881;TRINITY_DN104134_c0_g1|K07936;TRINITY_DN104364_c0_g1|K03537;TRINITY_DN17756_c0_g1|K12881;TRINITY_DN20330_c0_g1|K07562;TRINITY_DN20330_c0_g2|K07562;TRINITY_DN21380_c0_g1|K13137;TRINITY_DN22715_c0_g1|K13126;TRINITY_DN28080_c0_g1|K03754;TRINITY_DN33400_c0_g1|K03249;TRINITY_DN37745_c0_g1|K13137;TRINITY_DN38078_c0_g1|K03251;TRINITY_DN38194_c0_g1|K03241;TRINITY_DN40244_c0_…	TRINITY_DN100908_c0_g1|K12881;TRINITY_DN104134_c0_g1|K07936;TRINITY_DN104364_c0_g1|K03537;TRINITY_DN17756_c0_g1|K12881;TRINITY_DN20330_c0_g1|K07562;TRINITY_DN20330_c0_g2|K07562;TRINITY_DN21380_c0_g1|K13137;TRINITY_DN22715_c0_g1|K13126;TRINITY_DN28080_c0_g1|K03754;TRINITY_DN33400_c0_g1|K03249;TRINITY_DN37745_c0_g1|K13137;TRINITY_DN38078_c0_g1|K03251;TRINITY_DN38194_c0_g1|K03241;TRINITY_DN40244_c0_…	176	TRINITY_DN100495_c0_g1|K03253;TRINITY_DN100684_c0_g1|K03113;TRINITY_DN100851_c0_g1|K03258;TRINITY_DN100944_c0_g1|K03113;TRINITY_DN101872_c0_g1|K03754;TRINITY_DN101889_c0_g1|K03113;TRINITY_DN102032_c0_g1|K14324;TRINITY_DN102346_c0_g1|K12881;TRINITY_DN102689_c0_g1|K03236;TRINITY_DN102931_c0_g1|K03258;TRINITY_DN103193_c0_g1|K13126;TRINITY_DN104655_c0_g1|K03238;TRINITY_DN104874_c0_g1|K03247;TRINITY_D…	259	no
Selenocompound metabolism	64	143	9712	21976	0.492934	1	TRINITY_DN25388_c0_g1|K01874;TRINITY_DN30412_c0_g2|K01874;TRINITY_DN47272_c0_g2|K01758;TRINITY_DN61368_c0_g1|K01758;TRINITY_DN65736_c0_g2|K01739;TRINITY_DN67850_c0_g3|K01760;TRINITY_DN71392_c0_g1|K00384;TRINITY_DN74323_c0_g1|K00958;TRINITY_DN74510_c2_g1|K00549;TRINITY_DN74510_c2_g5|K00549;TRINITY_DN74510_c2_g7|K00549;TRINITY_DN74956_c0_g4|K01874;TRINITY_DN75261_c1_g2|K00549;TRINITY_DN75261_c1_g4|…	TRINITY_DN25388_c0_g1|K01874;TRINITY_DN30412_c0_g2|K01874;TRINITY_DN47272_c0_g2|K01758;TRINITY_DN61368_c0_g1|K01758;TRINITY_DN65736_c0_g2|K01739;TRINITY_DN67850_c0_g3|K01760;TRINITY_DN71392_c0_g1|K00384;TRINITY_DN74323_c0_g1|K00958;TRINITY_DN74510_c2_g1|K00549;TRINITY_DN74510_c2_g5|K00549;TRINITY_DN74510_c2_g7|K00549;TRINITY_DN74956_c0_g4|K01874;TRINITY_DN75261_c1_g2|K00549;TRINITY_DN75261_c1_g4|…	24	TRINITY_DN19536_c0_g1|K01758;TRINITY_DN21015_c0_g1|K01008;TRINITY_DN21015_c0_g2|K01008;TRINITY_DN40165_c0_g1|K01758;TRINITY_DN40165_c0_g2|K01758;TRINITY_DN45925_c0_g2|K00384;TRINITY_DN45925_c0_g4|K00384;TRINITY_DN47026_c0_g1|K00548;TRINITY_DN47333_c0_g1|K00549;TRINITY_DN52458_c0_g1|K01760;TRINITY_DN52458_c0_g2|K01758;TRINITY_DN52955_c0_g1|K01874;TRINITY_DN54418_c0_g1|K00384;TRINITY_DN54418_c0_g2|…	40	no
Sesquiterpenoid and triterpenoid biosynthesis	12	47	9764	22072	0.972527	1	TRINITY_DN62007_c0_g1|K00511;TRINITY_DN62007_c0_g2|K00511;TRINITY_DN71534_c1_g1|K00801;TRINITY_DN71709_c1_g1|K00801;TRINITY_DN71709_c1_g3|K00801;TRINITY_DN73177_c4_g4|K00511;TRINITY_DN71709_c1_g7|K00801;TRINITY_DN74576_c0_g1|K00511;TRINITY_DN84349_c0_g3|K15813;TRINITY_DN85244_c0_g1|K00801;TRINITY_DN95760_c0_g1|K00511;TRINITY_DN96984_c0_g1|K00801;	TRINITY_DN62007_c0_g1|K00511;TRINITY_DN62007_c0_g2|K00511;TRINITY_DN71534_c1_g1|K00801;TRINITY_DN71709_c1_g1|K00801;TRINITY_DN71709_c1_g3|K00801;TRINITY_DN73177_c4_g4|K00511	6	TRINITY_DN71709_c1_g7|K00801;TRINITY_DN74576_c0_g1|K00511;TRINITY_DN84349_c0_g3|K15813;TRINITY_DN85244_c0_g1|K00801;TRINITY_DN95760_c0_g1|K00511;TRINITY_DN96984_c0_g1|K00801	6	no
Spliceosome	376	1111	9400	21008	0.999999	1	TRINITY_DN100908_c0_g1|K12881;TRINITY_DN101068_c0_g1|K12861;TRINITY_DN101185_c0_g1|K12733;TRINITY_DN101194_c0_g1|K12815;TRINITY_DN101746_c0_g1|K11087;TRINITY_DN13635_c0_g1|K12625;TRINITY_DN15198_c0_g1|K12626;TRINITY_DN15683_c0_g1|K12893;TRINITY_DN17756_c0_g1|K12881;TRINITY_DN18615_c0_g1|K12858;TRINITY_DN18709_c0_g1|K11097;TRINITY_DN19431_c0_g1|K12871;TRINITY_DN23002_c0_g1|K12849;TRINITY_DN25750_c…	TRINITY_DN100908_c0_g1|K12881;TRINITY_DN101068_c0_g1|K12861;TRINITY_DN101185_c0_g1|K12733;TRINITY_DN101194_c0_g1|K12815;TRINITY_DN101746_c0_g1|K11087;TRINITY_DN13635_c0_g1|K12625;TRINITY_DN15198_c0_g1|K12626;TRINITY_DN15683_c0_g1|K12893;TRINITY_DN17756_c0_g1|K12881;TRINITY_DN18615_c0_g1|K12858;TRINITY_DN18709_c0_g1|K11097;TRINITY_DN19431_c0_g1|K12871;TRINITY_DN23002_c0_g1|K12849;TRINITY_DN25750_c…	179	TRINITY_DN102346_c0_g1|K12881;TRINITY_DN102996_c0_g1|K11096;TRINITY_DN103627_c0_g1|K03283;TRINITY_DN105029_c0_g1|K11087;TRINITY_DN11413_c0_g1|K12845;TRINITY_DN11722_c0_g1|K12845;TRINITY_DN14212_c0_g1|K06063;TRINITY_DN15099_c0_g1|K12872;TRINITY_DN15213_c0_g1|K13025;TRINITY_DN15359_c0_g1|K12868;TRINITY_DN15359_c0_g2|K12868;TRINITY_DN16064_c0_g1|K12622;TRINITY_DN20245_c0_g1|K12816;TRINITY_DN20245_c0…	197	no
Stilbenoid, diarylheptanoid and gingerol biosynthesis	3	16	9773	22103	0.959186	1	TRINITY_DN73016_c0_g1|K13065;TRINITY_DN84824_c2_g2|K13065;TRINITY_DN87132_c1_g2|K09754;	TRINITY_DN73016_c0_g1|K13065;TRINITY_DN84824_c2_g2|K13065;TRINITY_DN87132_c1_g2|K09754	3	.	0	no
Sulfur metabolism	54	156	9722	21963	0.950503	1	TRINITY_DN102655_c0_g1|K00380;TRINITY_DN19464_c0_g1|K00390;TRINITY_DN32355_c0_g1|K01082;TRINITY_DN33478_c0_g1|K01738;TRINITY_DN50137_c0_g1|K01738;TRINITY_DN50137_c0_g3|K01738;TRINITY_DN50773_c0_g1|K01082;TRINITY_DN59512_c0_g1|K17218;TRINITY_DN59512_c0_g2|K17218;TRINITY_DN65736_c0_g2|K01739;TRINITY_DN66888_c0_g1|K17069;TRINITY_DN66888_c0_g6|K17069;TRINITY_DN67790_c0_g1|K01738;TRINITY_DN68256_c1_g1…	TRINITY_DN102655_c0_g1|K00380;TRINITY_DN19464_c0_g1|K00390;TRINITY_DN32355_c0_g1|K01082;TRINITY_DN33478_c0_g1|K01738;TRINITY_DN50137_c0_g1|K01738;TRINITY_DN50137_c0_g3|K01738;TRINITY_DN50773_c0_g1|K01082;TRINITY_DN59512_c0_g1|K17218;TRINITY_DN59512_c0_g2|K17218;TRINITY_DN65736_c0_g2|K01739;TRINITY_DN66888_c0_g1|K17069;TRINITY_DN66888_c0_g6|K17069;TRINITY_DN67790_c0_g1|K01738;TRINITY_DN68256_c1_g1…	26	TRINITY_DN2503_c0_g1|K00380;TRINITY_DN40159_c0_g1|K17218;TRINITY_DN40159_c0_g2|K17218;TRINITY_DN40159_c0_g3|K17218;TRINITY_DN40584_c0_g1|K15422;TRINITY_DN40584_c0_g2|K15422;TRINITY_DN51725_c0_g1|K03119;TRINITY_DN55317_c0_g1|K17069;TRINITY_DN62437_c0_g1|K00390;TRINITY_DN66888_c0_g5|K17069;TRINITY_DN66888_c0_g8|K17069;TRINITY_DN69611_c0_g2|K01738;TRINITY_DN69871_c1_g2|K00380;TRINITY_DN69871_c1_g3|K…	28	no
Sulfur relay system	13	68	9763	22051	0.999182	1	TRINITY_DN31266_c0_g1|K11996;TRINITY_DN56085_c0_g2|K14171;TRINITY_DN64265_c0_g1|K14168;TRINITY_DN66237_c0_g1|K03635;TRINITY_DN72663_c2_g13|K14171;TRINITY_DN74318_c2_g4|K04487;TRINITY_DN75131_c0_g3|K04487;TRINITY_DN80535_c0_g1|K04487;TRINITY_DN103423_c0_g1|K04487;TRINITY_DN103901_c0_g1|K14171;TRINITY_DN72663_c2_g12|K14171;TRINITY_DN99188_c0_g1|K03639;TRINITY_DN99912_c0_g1|K14171;	TRINITY_DN31266_c0_g1|K11996;TRINITY_DN56085_c0_g2|K14171;TRINITY_DN64265_c0_g1|K14168;TRINITY_DN66237_c0_g1|K03635;TRINITY_DN72663_c2_g13|K14171;TRINITY_DN74318_c2_g4|K04487;TRINITY_DN75131_c0_g3|K04487;TRINITY_DN80535_c0_g1|K04487	8	TRINITY_DN103423_c0_g1|K04487;TRINITY_DN103901_c0_g1|K14171;TRINITY_DN72663_c2_g12|K14171;TRINITY_DN99188_c0_g1|K03639;TRINITY_DN99912_c0_g1|K14171	5	no
Terpenoid backbone biosynthesis	52	159	9724	21960	0.977536	1	TRINITY_DN102954_c0_g1|K11778;TRINITY_DN24689_c0_g1|K00804;TRINITY_DN30426_c0_g2|K00587;TRINITY_DN32701_c0_g1|K00787;TRINITY_DN36423_c0_g2|K05954;TRINITY_DN46016_c0_g1|K00804;TRINITY_DN50807_c0_g3|K05355;TRINITY_DN64723_c0_g1|K19177;TRINITY_DN64952_c0_g1|K05955;TRINITY_DN65425_c0_g1|K00587;TRINITY_DN65962_c0_g2|K00869;TRINITY_DN66428_c0_g2|K05906;TRINITY_DN67343_c1_g2|K00626;TRINITY_DN69244_c2_g1…	TRINITY_DN102954_c0_g1|K11778;TRINITY_DN24689_c0_g1|K00804;TRINITY_DN30426_c0_g2|K00587;TRINITY_DN32701_c0_g1|K00787;TRINITY_DN36423_c0_g2|K05954;TRINITY_DN46016_c0_g1|K00804;TRINITY_DN50807_c0_g3|K05355;TRINITY_DN64723_c0_g1|K19177;TRINITY_DN64952_c0_g1|K05955;TRINITY_DN65425_c0_g1|K00587;TRINITY_DN65962_c0_g2|K00869;TRINITY_DN66428_c0_g2|K05906;TRINITY_DN67343_c1_g2|K00626;TRINITY_DN69244_c2_g1…	24	TRINITY_DN16812_c0_g2|K00787;TRINITY_DN18561_c0_g1|K00626;TRINITY_DN20773_c0_g1|K05955;TRINITY_DN20827_c0_g1|K00804;TRINITY_DN20827_c0_g2|K00804;TRINITY_DN24019_c0_g1|K01641;TRINITY_DN27411_c0_g1|K00869;TRINITY_DN27411_c0_g2|K00869;TRINITY_DN34277_c0_g3|K00804;TRINITY_DN37214_c0_g1|K00804;TRINITY_DN37517_c0_g1|K11778;TRINITY_DN37517_c0_g2|K11778;TRINITY_DN50066_c0_g1|K00626;TRINITY_DN50066_c0_g2|…	28	no
Thiamine metabolism	42	123	9734	21996	0.939774	1	TRINITY_DN16191_c0_g1|K00939;TRINITY_DN32867_c0_g1|K14394;TRINITY_DN33925_c0_g1|K01078;TRINITY_DN61473_c1_g1|K00939;TRINITY_DN64328_c0_g1|K00939;TRINITY_DN68546_c0_g1|K01078;TRINITY_DN69663_c0_g1|K01078;TRINITY_DN69863_c0_g1|K01077;TRINITY_DN72774_c0_g1|K01078;TRINITY_DN72966_c2_g1|K00939;TRINITY_DN73817_c0_g1|K01078;TRINITY_DN74318_c2_g4|K04487;TRINITY_DN74623_c0_g1|K01077;TRINITY_DN75131_c0_g3|…	TRINITY_DN16191_c0_g1|K00939;TRINITY_DN32867_c0_g1|K14394;TRINITY_DN33925_c0_g1|K01078;TRINITY_DN61473_c1_g1|K00939;TRINITY_DN64328_c0_g1|K00939;TRINITY_DN68546_c0_g1|K01078;TRINITY_DN69663_c0_g1|K01078;TRINITY_DN69863_c0_g1|K01077;TRINITY_DN72774_c0_g1|K01078;TRINITY_DN72966_c2_g1|K00939;TRINITY_DN73817_c0_g1|K01078;TRINITY_DN74318_c2_g4|K04487;TRINITY_DN74623_c0_g1|K01077;TRINITY_DN75131_c0_g3|…	25	TRINITY_DN102951_c0_g1|K00939;TRINITY_DN103423_c0_g1|K04487;TRINITY_DN103574_c0_g1|K00939;TRINITY_DN1198_c0_g1|K01077;TRINITY_DN3367_c0_g1|K01078;TRINITY_DN38968_c0_g2|K01078;TRINITY_DN55854_c0_g1|K00939;TRINITY_DN56346_c0_g1|K01077;TRINITY_DN58064_c1_g2|K01077;TRINITY_DN72966_c0_g1|K00939;TRINITY_DN77538_c2_g5|K03146;TRINITY_DN77978_c0_g1|K01077;TRINITY_DN77978_c0_g2|K01077;TRINITY_DN77978_c1_g4…	17	no
Ubiquinone and other terpenoid-quinone biosynthesis	50	108	9726	22011	0.422287	1	TRINITY_DN101246_c0_g1|K00568;TRINITY_DN10635_c0_g1|K00838;TRINITY_DN32050_c0_g1|K06127;TRINITY_DN35657_c0_g1|K00838;TRINITY_DN42404_c0_g1|K00457;TRINITY_DN42837_c0_g1|K00457;TRINITY_DN43848_c0_g2|K00838;TRINITY_DN44380_c0_g1|K06126;TRINITY_DN44764_c0_g1|K00457;TRINITY_DN44764_c0_g4|K00457;TRINITY_DN55996_c0_g1|K00457;TRINITY_DN62661_c0_g1|K06127;TRINITY_DN64386_c0_g1|K19267;TRINITY_DN64386_c0_g2…	TRINITY_DN101246_c0_g1|K00568;TRINITY_DN10635_c0_g1|K00838;TRINITY_DN32050_c0_g1|K06127;TRINITY_DN35657_c0_g1|K00838;TRINITY_DN42404_c0_g1|K00457;TRINITY_DN42837_c0_g1|K00457;TRINITY_DN43848_c0_g2|K00838;TRINITY_DN44380_c0_g1|K06126;TRINITY_DN44764_c0_g1|K00457;TRINITY_DN44764_c0_g4|K00457;TRINITY_DN55996_c0_g1|K00457;TRINITY_DN62661_c0_g1|K06127;TRINITY_DN64386_c0_g1|K19267;TRINITY_DN64386_c0_g2…	24	TRINITY_DN102638_c0_g1|K19267;TRINITY_DN103405_c0_g1|K00457;TRINITY_DN11805_c0_g1|K03809;TRINITY_DN24507_c0_g2|K03183;TRINITY_DN30597_c0_g3|K00568;TRINITY_DN32620_c0_g1|K03809;TRINITY_DN33656_c0_g1|K06134;TRINITY_DN33760_c0_g1|K00457;TRINITY_DN36759_c0_g1|K00568;TRINITY_DN37024_c0_g1|K00457;TRINITY_DN37605_c0_g1|K00457;TRINITY_DN40047_c0_g1|K00838;TRINITY_DN40047_c0_g2|K00838;TRINITY_DN44971_c0_g…	26	no
Ubiquitin mediated proteolysis	208	582	9568	21537	0.99693	1	TRINITY_DN102802_c0_g1|K10579;TRINITY_DN103191_c0_g1|K10578;TRINITY_DN103676_c0_g1|K03868;TRINITY_DN13443_c0_g1|K04554;TRINITY_DN18818_c0_g1|K06689;TRINITY_DN21174_c0_g1|K04649;TRINITY_DN22878_c0_g1|K10580;TRINITY_DN22988_c0_g1|K04555;TRINITY_DN23387_c0_g2|K10580;TRINITY_DN30419_c0_g1|K03178;TRINITY_DN34596_c0_g1|K10685;TRINITY_DN39838_c1_g2|K10688;TRINITY_DN40037_c0_g1|K10601;TRINITY_DN40037_c0_…	TRINITY_DN102802_c0_g1|K10579;TRINITY_DN103191_c0_g1|K10578;TRINITY_DN103676_c0_g1|K03868;TRINITY_DN13443_c0_g1|K04554;TRINITY_DN18818_c0_g1|K06689;TRINITY_DN21174_c0_g1|K04649;TRINITY_DN22878_c0_g1|K10580;TRINITY_DN22988_c0_g1|K04555;TRINITY_DN23387_c0_g2|K10580;TRINITY_DN30419_c0_g1|K03178;TRINITY_DN34596_c0_g1|K10685;TRINITY_DN39838_c1_g2|K10688;TRINITY_DN40037_c0_g1|K10601;TRINITY_DN40037_c0_…	72	TRINITY_DN100031_c0_g1|K06688;TRINITY_DN100401_c0_g1|K03094;TRINITY_DN100877_c0_g1|K10259;TRINITY_DN102470_c0_g1|K10590;TRINITY_DN102692_c0_g1|K10591;TRINITY_DN103692_c0_g1|K10688;TRINITY_DN105168_c0_g1|K03347;TRINITY_DN14004_c0_g1|K10583;TRINITY_DN16113_c0_g1|K04649;TRINITY_DN16113_c0_g2|K04649;TRINITY_DN16366_c0_g1|K03347;TRINITY_DN16551_c0_g2|K10591;TRINITY_DN16596_c0_g1|K03872;TRINITY_DN17769…	136	no
Valine, leucine and isoleucine biosynthesis	57	131	9719	21988	0.566815	1	TRINITY_DN16805_c0_g1|K01687;TRINITY_DN20871_c0_g1|K01649;TRINITY_DN20871_c0_g2|K01649;TRINITY_DN22090_c0_g1|K01653;TRINITY_DN22090_c0_g2|K01653;TRINITY_DN47163_c0_g1|K01687;TRINITY_DN60084_c0_g3|K01754;TRINITY_DN67777_c0_g2|K00826;TRINITY_DN67777_c0_g3|K00826;TRINITY_DN69760_c0_g1|K01653;TRINITY_DN70448_c0_g1|K01687;TRINITY_DN70448_c0_g2|K01687;TRINITY_DN71404_c1_g1|K01649;TRINITY_DN71404_c1_g2|…	TRINITY_DN16805_c0_g1|K01687;TRINITY_DN20871_c0_g1|K01649;TRINITY_DN20871_c0_g2|K01649;TRINITY_DN22090_c0_g1|K01653;TRINITY_DN22090_c0_g2|K01653;TRINITY_DN47163_c0_g1|K01687;TRINITY_DN60084_c0_g3|K01754;TRINITY_DN67777_c0_g2|K00826;TRINITY_DN67777_c0_g3|K00826;TRINITY_DN69760_c0_g1|K01653;TRINITY_DN70448_c0_g1|K01687;TRINITY_DN70448_c0_g2|K01687;TRINITY_DN71404_c1_g1|K01649;TRINITY_DN71404_c1_g2|…	28	TRINITY_DN100182_c0_g1|K01687;TRINITY_DN14726_c0_g1|K01653;TRINITY_DN22323_c0_g1|K01649;TRINITY_DN22586_c0_g1|K00053;TRINITY_DN25283_c0_g1|K01687;TRINITY_DN31641_c0_g1|K00826;TRINITY_DN31767_c0_g1|K01702;TRINITY_DN43267_c0_g1|K00053;TRINITY_DN43333_c0_g2|K17989;TRINITY_DN50259_c0_g1|K00826;TRINITY_DN62049_c0_g1|K01649;TRINITY_DN73541_c0_g4|K00053;TRINITY_DN73717_c0_g1|K01652;TRINITY_DN74462_c0_g4…	29	no
Valine, leucine and isoleucine degradation	162	369	9614	21750	0.545071	1	TRINITY_DN101065_c0_g1|K07513;TRINITY_DN24790_c0_g1|K09699;TRINITY_DN24790_c0_g2|K09699;TRINITY_DN32022_c0_g1|K05605;TRINITY_DN32022_c0_g3|K05605;TRINITY_DN38186_c0_g2|K00167;TRINITY_DN4022_c0_g1|K00020;TRINITY_DN50068_c0_g1|K00022;TRINITY_DN50205_c1_g1|K00140;TRINITY_DN52270_c0_g1|K07511;TRINITY_DN59181_c0_g1|K00217|K01027;TRINITY_DN61713_c0_g1|K00128;TRINITY_DN61713_c0_g2|K00128;TRINITY_DN62098…	TRINITY_DN101065_c0_g1|K07513;TRINITY_DN24790_c0_g1|K09699;TRINITY_DN24790_c0_g2|K09699;TRINITY_DN32022_c0_g1|K05605;TRINITY_DN32022_c0_g3|K05605;TRINITY_DN38186_c0_g2|K00167;TRINITY_DN4022_c0_g1|K00020;TRINITY_DN50068_c0_g1|K00022;TRINITY_DN50205_c1_g1|K00140;TRINITY_DN52270_c0_g1|K07511;TRINITY_DN59181_c0_g1|K00217|K01027;TRINITY_DN61713_c0_g1|K00128;TRINITY_DN61713_c0_g2|K00128;TRINITY_DN62098…	56	TRINITY_DN101506_c0_g1|K01965;TRINITY_DN101648_c0_g1|K14085;TRINITY_DN102145_c0_g1|K01640;TRINITY_DN103038_c0_g1|K00166;TRINITY_DN103580_c0_g1|K07511;TRINITY_DN13050_c0_g1|K00382;TRINITY_DN15742_c0_g1|K14085;TRINITY_DN15742_c0_g2|K14085;TRINITY_DN16158_c0_g1|K18660;TRINITY_DN18561_c0_g1|K00626;TRINITY_DN20817_c0_g1|K07513;TRINITY_DN22569_c0_g1|K08683;TRINITY_DN22569_c0_g2|K08683;TRINITY_DN24019_c…	106	no
Vancomycin resistance	1	3	9775	22116	0.768721	1	TRINITY_DN73578_c0_g1|K07260;	.	0	TRINITY_DN73578_c0_g1|K07260	1	no
Zeatin biosynthesis	4	9	9772	22110	0.599505	1	TRINITY_DN82865_c1_g3|K13493;TRINITY_DN83093_c0_g2|K00279;TRINITY_DN81003_c0_g2|K13492;TRINITY_DN82456_c1_g1|K00279;	TRINITY_DN82865_c1_g3|K13493;TRINITY_DN83093_c0_g2|K00279	2	TRINITY_DN81003_c0_g2|K13492;TRINITY_DN82456_c1_g1|K00279	2	no

## Sheet: GO_BP
Table S7b GO terms in Biological Process of DEGs in Flowers
Term_name	Accession	p-value	FDR	Alt_id	Background_Count	DE_Gene	DE_Count	Up_Gene	Up_Count	Down_Gene	Down_Count	Result
translation	GO:0006412	3.4907e-93	3.60729e-89	GO:0006416|GO:0006453|GO:0043037	6338	TRINITY_DN85272_c2_g2|TRINITY_DN72811_c4_g14|TRINITY_DN100886_c0_g1|TRINITY_DN103281_c0_g1|TRINITY_DN78231_c1_g4|TRINITY_DN78231_c1_g5|TRINITY_DN78231_c1_g3|TRINITY_DN78231_c1_g1|TRINITY_DN91757_c0_g1|TRINITY_DN69240_c0_g1|TRINITY_DN42079_c1_g1|TRINITY_DN72817_c1_g1|TRINITY_DN72709_c4_g1|TRINITY_DN74045_c3_g2|TRINITY_DN71742_c5_g9|TRINITY_DN77173_c2_g4|TRINITY_DN77173_c2_g2|TRINITY_DN71554_c3_g1|…	2565	TRINITY_DN72354_c5_g8|TRINITY_DN77299_c1_g4|TRINITY_DN53340_c0_g1|TRINITY_DN62907_c0_g1|TRINITY_DN79485_c4_g1|TRINITY_DN15752_c0_g1|TRINITY_DN79244_c3_g5|TRINITY_DN58200_c0_g1|TRINITY_DN98340_c0_g1|TRINITY_DN72354_c5_g6|TRINITY_DN58200_c0_g2|TRINITY_DN79219_c2_g1|TRINITY_DN68987_c0_g1|TRINITY_DN83485_c0_g3|TRINITY_DN73790_c3_g3|TRINITY_DN75027_c3_g1|TRINITY_DN74683_c4_g2|TRINITY_DN73497_c0_g1|TRI…	906	TRINITY_DN80050_c0_g1|TRINITY_DN34786_c0_g1|TRINITY_DN73497_c0_g3|TRINITY_DN77578_c3_g1|TRINITY_DN73790_c3_g5|TRINITY_DN7610_c0_g1|TRINITY_DN31657_c0_g1|TRINITY_DN74442_c1_g3|TRINITY_DN74442_c1_g6|TRINITY_DN83198_c1_g1|TRINITY_DN63806_c1_g1|TRINITY_DN78657_c2_g1|TRINITY_DN74064_c0_g13|TRINITY_DN72709_c2_g10|TRINITY_DN72709_c2_g13|TRINITY_DN76372_c0_g2|TRINITY_DN85797_c3_g2|TRINITY_DN72709_c4_g1|T…	1659	yes
peptide biosynthetic process	GO:0043043	9.13159e-92	4.71829e-88	--	6470	TRINITY_DN85272_c2_g2|TRINITY_DN72811_c4_g14|TRINITY_DN100886_c0_g1|TRINITY_DN74308_c0_g1|TRINITY_DN78231_c1_g4|TRINITY_DN78231_c1_g5|TRINITY_DN78231_c1_g3|TRINITY_DN78231_c1_g1|TRINITY_DN2633_c0_g1|TRINITY_DN91757_c0_g1|TRINITY_DN69240_c0_g1|TRINITY_DN42079_c1_g1|TRINITY_DN72817_c1_g1|TRINITY_DN72709_c4_g1|TRINITY_DN74045_c3_g2|TRINITY_DN103281_c0_g1|TRINITY_DN23306_c0_g1|TRINITY_DN77173_c2_g2|T…	2604	TRINITY_DN72354_c5_g8|TRINITY_DN77299_c1_g4|TRINITY_DN53340_c0_g1|TRINITY_DN62907_c0_g1|TRINITY_DN79485_c4_g1|TRINITY_DN15752_c0_g1|TRINITY_DN79244_c3_g5|TRINITY_DN73823_c0_g1|TRINITY_DN58200_c0_g1|TRINITY_DN98340_c0_g1|TRINITY_DN72354_c5_g6|TRINITY_DN58200_c0_g2|TRINITY_DN79219_c2_g1|TRINITY_DN68987_c0_g1|TRINITY_DN83485_c0_g3|TRINITY_DN73790_c3_g3|TRINITY_DN75027_c3_g1|TRINITY_DN74683_c4_g2|TRI…	931	TRINITY_DN80050_c0_g1|TRINITY_DN34786_c0_g1|TRINITY_DN73497_c0_g3|TRINITY_DN77578_c3_g1|TRINITY_DN73790_c3_g5|TRINITY_DN7610_c0_g1|TRINITY_DN31657_c0_g1|TRINITY_DN74442_c1_g3|TRINITY_DN74442_c1_g6|TRINITY_DN83198_c1_g1|TRINITY_DN63806_c1_g1|TRINITY_DN78657_c2_g1|TRINITY_DN74064_c0_g13|TRINITY_DN72709_c2_g10|TRINITY_DN72709_c2_g13|TRINITY_DN76372_c0_g2|TRINITY_DN85797_c3_g2|TRINITY_DN72709_c4_g1|T…	1673	yes
peptide metabolic process	GO:0006518	7.73497e-89	2.66444e-85	--	7046	TRINITY_DN85272_c2_g2|TRINITY_DN72811_c4_g14|TRINITY_DN100886_c0_g1|TRINITY_DN74308_c0_g1|TRINITY_DN78231_c1_g4|TRINITY_DN78231_c1_g5|TRINITY_DN78231_c1_g3|TRINITY_DN78231_c1_g1|TRINITY_DN2633_c0_g1|TRINITY_DN91757_c0_g1|TRINITY_DN69240_c0_g1|TRINITY_DN42079_c1_g1|TRINITY_DN72817_c1_g1|TRINITY_DN72709_c4_g1|TRINITY_DN103281_c0_g1|TRINITY_DN23306_c0_g1|TRINITY_DN72536_c0_g11|TRINITY_DN71554_c3_g1|…	2786	TRINITY_DN72354_c5_g8|TRINITY_DN77299_c1_g4|TRINITY_DN53340_c0_g1|TRINITY_DN62907_c0_g1|TRINITY_DN79485_c4_g1|TRINITY_DN15752_c0_g1|TRINITY_DN79244_c3_g5|TRINITY_DN73823_c0_g1|TRINITY_DN58200_c0_g1|TRINITY_DN98340_c0_g1|TRINITY_DN72354_c5_g6|TRINITY_DN58200_c0_g2|TRINITY_DN79219_c2_g1|TRINITY_DN68987_c0_g1|TRINITY_DN83485_c0_g3|TRINITY_DN73790_c3_g3|TRINITY_DN75027_c3_g1|TRINITY_DN74683_c4_g2|TRI…	1012	TRINITY_DN80050_c0_g1|TRINITY_DN34786_c0_g1|TRINITY_DN73497_c0_g3|TRINITY_DN77578_c3_g1|TRINITY_DN73790_c3_g5|TRINITY_DN7610_c0_g1|TRINITY_DN31657_c0_g1|TRINITY_DN74442_c1_g3|TRINITY_DN74442_c1_g6|TRINITY_DN83198_c1_g1|TRINITY_DN63806_c1_g1|TRINITY_DN78657_c2_g1|TRINITY_DN74064_c0_g13|TRINITY_DN72709_c2_g10|TRINITY_DN72709_c2_g13|TRINITY_DN76372_c0_g2|TRINITY_DN103501_c0_g1|TRINITY_DN85797_c3_g2|…	1774	yes
amide biosynthetic process	GO:0043604	1.64504e-84	4.24997e-81	--	6925	TRINITY_DN85272_c2_g2|TRINITY_DN72811_c4_g14|TRINITY_DN100886_c0_g1|TRINITY_DN74308_c0_g1|TRINITY_DN78231_c1_g4|TRINITY_DN78231_c1_g5|TRINITY_DN78231_c1_g3|TRINITY_DN78231_c1_g1|TRINITY_DN2633_c0_g1|TRINITY_DN91757_c0_g1|TRINITY_DN69240_c0_g1|TRINITY_DN42079_c1_g1|TRINITY_DN72817_c1_g1|TRINITY_DN72709_c4_g1|TRINITY_DN74045_c3_g2|TRINITY_DN103281_c0_g1|TRINITY_DN77173_c2_g4|TRINITY_DN77173_c2_g2|T…	2726	TRINITY_DN72354_c5_g8|TRINITY_DN77299_c1_g4|TRINITY_DN53340_c0_g1|TRINITY_DN62907_c0_g1|TRINITY_DN79485_c4_g1|TRINITY_DN15752_c0_g1|TRINITY_DN79244_c3_g5|TRINITY_DN73823_c0_g1|TRINITY_DN58200_c0_g1|TRINITY_DN98340_c0_g1|TRINITY_DN72354_c5_g6|TRINITY_DN58200_c0_g2|TRINITY_DN79219_c2_g1|TRINITY_DN68987_c0_g1|TRINITY_DN83485_c0_g3|TRINITY_DN73790_c3_g3|TRINITY_DN75027_c3_g1|TRINITY_DN74683_c4_g2|TRI…	987	TRINITY_DN80050_c0_g1|TRINITY_DN34786_c0_g1|TRINITY_DN73497_c0_g3|TRINITY_DN77578_c3_g1|TRINITY_DN73790_c3_g5|TRINITY_DN7610_c0_g1|TRINITY_DN31657_c0_g1|TRINITY_DN74442_c1_g3|TRINITY_DN74442_c1_g6|TRINITY_DN83198_c1_g1|TRINITY_DN63806_c1_g1|TRINITY_DN78657_c2_g1|TRINITY_DN74064_c0_g13|TRINITY_DN72709_c2_g10|TRINITY_DN72709_c2_g13|TRINITY_DN76372_c0_g2|TRINITY_DN85797_c3_g2|TRINITY_DN72709_c4_g1|T…	1739	yes
cellular amide metabolic process	GO:0043603	2.30905e-80	4.77235e-77	--	7833	TRINITY_DN85272_c2_g2|TRINITY_DN72811_c4_g14|TRINITY_DN100886_c0_g1|TRINITY_DN74308_c0_g1|TRINITY_DN78231_c1_g4|TRINITY_DN78231_c1_g5|TRINITY_DN78231_c1_g3|TRINITY_DN78231_c1_g1|TRINITY_DN2633_c0_g1|TRINITY_DN91757_c0_g1|TRINITY_DN69240_c0_g1|TRINITY_DN42079_c1_g1|TRINITY_DN72817_c1_g1|TRINITY_DN72709_c4_g1|TRINITY_DN74045_c3_g2|TRINITY_DN103281_c0_g1|TRINITY_DN77173_c2_g4|TRINITY_DN72536_c0_g11|…	3009	TRINITY_DN72354_c5_g8|TRINITY_DN67138_c0_g1|TRINITY_DN77299_c1_g4|TRINITY_DN53340_c0_g1|TRINITY_DN62907_c0_g1|TRINITY_DN79485_c4_g1|TRINITY_DN41331_c0_g1|TRINITY_DN79244_c3_g5|TRINITY_DN73357_c0_g3|TRINITY_DN73823_c0_g1|TRINITY_DN58200_c0_g1|TRINITY_DN98340_c0_g1|TRINITY_DN72354_c5_g6|TRINITY_DN58200_c0_g2|TRINITY_DN79219_c2_g1|TRINITY_DN68987_c0_g1|TRINITY_DN83485_c0_g3|TRINITY_DN73790_c3_g3|TRI…	1097	TRINITY_DN80050_c0_g1|TRINITY_DN34786_c0_g1|TRINITY_DN73497_c0_g3|TRINITY_DN77578_c3_g1|TRINITY_DN73790_c3_g5|TRINITY_DN7610_c0_g1|TRINITY_DN31657_c0_g1|TRINITY_DN74442_c1_g3|TRINITY_DN74442_c1_g6|TRINITY_DN83198_c1_g1|TRINITY_DN63806_c1_g1|TRINITY_DN78657_c2_g1|TRINITY_DN39989_c0_g3|TRINITY_DN39989_c0_g1|TRINITY_DN74064_c0_g13|TRINITY_DN72709_c2_g10|TRINITY_DN72709_c2_g13|TRINITY_DN76372_c0_g2|T…	1912	yes
organonitrogen compound biosynthetic process	GO:1901566	7.6008e-66	1.30911e-62	--	11910	TRINITY_DN85272_c2_g2|TRINITY_DN72811_c4_g14|TRINITY_DN100886_c0_g1|TRINITY_DN79013_c4_g3|TRINITY_DN74308_c0_g1|TRINITY_DN78231_c1_g4|TRINITY_DN78231_c1_g5|TRINITY_DN78231_c1_g3|TRINITY_DN78231_c1_g1|TRINITY_DN2633_c0_g1|TRINITY_DN91757_c0_g1|TRINITY_DN3189_c0_g1|TRINITY_DN70824_c0_g2|TRINITY_DN69240_c0_g1|TRINITY_DN42079_c1_g1|TRINITY_DN72817_c1_g1|TRINITY_DN24629_c0_g2|TRINITY_DN72709_c4_g1|TRI…	4245	TRINITY_DN72354_c5_g8|TRINITY_DN53340_c0_g1|TRINITY_DN73497_c0_g1|TRINITY_DN79485_c4_g1|TRINITY_DN15752_c0_g1|TRINITY_DN72354_c5_g6|TRINITY_DN77187_c2_g1|TRINITY_DN68826_c0_g2|TRINITY_DN77392_c1_g3|TRINITY_DN62907_c0_g1|TRINITY_DN74480_c2_g3|TRINITY_DN69611_c0_g4|TRINITY_DN76508_c2_g8|TRINITY_DN69866_c2_g1|TRINITY_DN8173_c0_g1|TRINITY_DN81860_c0_g1|TRINITY_DN67836_c1_g2|TRINITY_DN74064_c0_g12|TRI…	1691	TRINITY_DN80050_c0_g1|TRINITY_DN34786_c0_g1|TRINITY_DN73497_c0_g3|TRINITY_DN78657_c1_g14|TRINITY_DN73790_c3_g5|TRINITY_DN83383_c2_g17|TRINITY_DN83383_c2_g16|TRINITY_DN77392_c1_g5|TRINITY_DN77392_c1_g6|TRINITY_DN77392_c1_g1|TRINITY_DN76655_c0_g1|TRINITY_DN7610_c0_g1|TRINITY_DN42516_c0_g1|TRINITY_DN31657_c0_g1|TRINITY_DN74442_c1_g3|TRINITY_DN69611_c0_g2|TRINITY_DN74442_c1_g6|TRINITY_DN76956_c0_g6|T…	2554	yes
cytoplasmic translation	GO:0002181	5.52448e-46	8.15571e-43	--	2206	TRINITY_DN98494_c0_g1|TRINITY_DN100886_c0_g1|TRINITY_DN75736_c2_g1|TRINITY_DN83007_c2_g2|TRINITY_DN78231_c1_g5|TRINITY_DN78433_c0_g1|TRINITY_DN78231_c1_g3|TRINITY_DN78231_c1_g1|TRINITY_DN85505_c2_g1|TRINITY_DN72428_c1_g3|TRINITY_DN76459_c1_g7|TRINITY_DN69240_c0_g1|TRINITY_DN73445_c2_g2|TRINITY_DN83808_c4_g2|TRINITY_DN72709_c4_g1|TRINITY_DN74466_c1_g5|TRINITY_DN73233_c3_g2|TRINITY_DN94416_c0_g1|TR…	947	TRINITY_DN101703_c0_g1|TRINITY_DN74192_c2_g7|TRINITY_DN74192_c2_g5|TRINITY_DN53340_c0_g1|TRINITY_DN79485_c4_g1|TRINITY_DN79598_c1_g1|TRINITY_DN73254_c2_g6|TRINITY_DN73543_c0_g1|TRINITY_DN58200_c0_g1|TRINITY_DN72354_c5_g6|TRINITY_DN58200_c0_g2|TRINITY_DN80693_c2_g4|TRINITY_DN77797_c2_g6|TRINITY_DN80693_c2_g2|TRINITY_DN81533_c4_g3|TRINITY_DN80795_c0_g1|TRINITY_DN75027_c3_g1|TRINITY_DN76735_c0_g1|TR…	332	TRINITY_DN46614_c0_g2|TRINITY_DN83808_c5_g1|TRINITY_DN83485_c0_g5|TRINITY_DN79403_c0_g1|TRINITY_DN80646_c2_g6|TRINITY_DN91340_c0_g1|TRINITY_DN31657_c0_g1|TRINITY_DN77504_c0_g2|TRINITY_DN83198_c1_g1|TRINITY_DN104744_c0_g1|TRINITY_DN78657_c2_g1|TRINITY_DN100886_c0_g1|TRINITY_DN85884_c0_g2|TRINITY_DN72709_c2_g10|TRINITY_DN72709_c2_g13|TRINITY_DN68040_c2_g1|TRINITY_DN76372_c0_g2|TRINITY_DN79857_c0_g1…	615	yes
socially cooperative development	GO:0099120	2.23623e-36	2.88865e-33	--	500	TRINITY_DN74030_c0_g1|TRINITY_DN72380_c2_g1|TRINITY_DN37743_c0_g1|TRINITY_DN69940_c2_g2|TRINITY_DN69940_c2_g1|TRINITY_DN38128_c0_g1|TRINITY_DN95373_c0_g1|TRINITY_DN65740_c2_g1|TRINITY_DN67379_c0_g1|TRINITY_DN19864_c0_g2|TRINITY_DN102451_c0_g1|TRINITY_DN65740_c2_g2|TRINITY_DN104953_c0_g1|TRINITY_DN16366_c0_g1|TRINITY_DN73472_c3_g2|TRINITY_DN13626_c0_g1|TRINITY_DN71414_c2_g9|TRINITY_DN47711_c0_g1|T…	279	TRINITY_DN73441_c3_g7|TRINITY_DN75857_c0_g1|TRINITY_DN67221_c0_g4|TRINITY_DN39913_c0_g2|TRINITY_DN65740_c0_g1|TRINITY_DN43554_c1_g1|TRINITY_DN75857_c0_g3|TRINITY_DN65740_c2_g1|TRINITY_DN69940_c2_g1|TRINITY_DN69940_c2_g2|TRINITY_DN72054_c4_g7|TRINITY_DN102451_c0_g1|TRINITY_DN61994_c1_g1|TRINITY_DN104953_c0_g1|TRINITY_DN38464_c0_g2|TRINITY_DN38464_c0_g1|TRINITY_DN79659_c4_g1|TRINITY_DN73883_c2_g8|T…	29	TRINITY_DN77355_c0_g13|TRINITY_DN80183_c0_g2|TRINITY_DN99481_c0_g1|TRINITY_DN74738_c4_g2|TRINITY_DN74738_c4_g1|TRINITY_DN60607_c0_g2|TRINITY_DN24823_c0_g1|TRINITY_DN56764_c0_g1|TRINITY_DN31445_c0_g1|TRINITY_DN99016_c0_g1|TRINITY_DN31086_c0_g2|TRINITY_DN66016_c0_g1|TRINITY_DN51709_c0_g2|TRINITY_DN77355_c0_g10|TRINITY_DN42885_c0_g1|TRINITY_DN46511_c0_g2|TRINITY_DN45443_c0_g1|TRINITY_DN60607_c0_g1|T…	250	yes
oxidation-reduction process	GO:0055114	3.56438e-36	4.0927e-33	--	6816	TRINITY_DN75808_c1_g4|TRINITY_DN74147_c0_g1|TRINITY_DN8632_c0_g1|TRINITY_DN97834_c0_g1|TRINITY_DN69815_c0_g2|TRINITY_DN69815_c0_g1|TRINITY_DN75785_c4_g10|TRINITY_DN62680_c0_g4|TRINITY_DN77806_c2_g1|TRINITY_DN75436_c4_g1|TRINITY_DN27286_c0_g1|TRINITY_DN74433_c0_g3|TRINITY_DN71670_c2_g1|TRINITY_DN74728_c0_g3|TRINITY_DN74433_c0_g7|TRINITY_DN74728_c0_g1|TRINITY_DN104058_c0_g1|TRINITY_DN77387_c1_g3|TR…	2428	TRINITY_DN68332_c0_g32|TRINITY_DN78376_c0_g9|TRINITY_DN76163_c0_g1|TRINITY_DN68506_c0_g4|TRINITY_DN73222_c1_g1|TRINITY_DN73222_c1_g2|TRINITY_DN74104_c0_g4|TRINITY_DN36062_c0_g1|TRINITY_DN71145_c0_g1|TRINITY_DN78376_c0_g4|TRINITY_DN74104_c0_g1|TRINITY_DN78376_c0_g6|TRINITY_DN72417_c0_g7|TRINITY_DN86099_c0_g1|TRINITY_DN79947_c1_g7|TRINITY_DN64673_c0_g1|TRINITY_DN75318_c2_g1|TRINITY_DN69218_c0_g1|TR…	1142	TRINITY_DN73086_c2_g1|TRINITY_DN75583_c1_g9|TRINITY_DN73308_c2_g2|TRINITY_DN74104_c0_g8|TRINITY_DN33473_c0_g3|TRINITY_DN74104_c0_g6|TRINITY_DN61723_c0_g2|TRINITY_DN75583_c1_g4|TRINITY_DN44596_c0_g2|TRINITY_DN85633_c0_g9|TRINITY_DN70909_c0_g5|TRINITY_DN86606_c0_g3|TRINITY_DN78605_c1_g5|TRINITY_DN72417_c0_g2|TRINITY_DN100508_c0_g1|TRINITY_DN78605_c1_g6|TRINITY_DN99795_c0_g1|TRINITY_DN73066_c2_g3|TR…	1286	yes
actin filament organization	GO:0007015	3.20846e-28	3.31562e-25	--	935	TRINITY_DN69940_c2_g2|TRINITY_DN69940_c2_g1|TRINITY_DN33941_c0_g2|TRINITY_DN33941_c0_g3|TRINITY_DN33941_c0_g1|TRINITY_DN33941_c0_g4|TRINITY_DN43287_c0_g1|TRINITY_DN48262_c0_g1|TRINITY_DN57035_c0_g1|TRINITY_DN82195_c4_g6|TRINITY_DN82195_c4_g1|TRINITY_DN82195_c4_g3|TRINITY_DN38342_c0_g1|TRINITY_DN62671_c0_g1|TRINITY_DN74523_c0_g10|TRINITY_DN74483_c2_g1|TRINITY_DN98371_c0_g1|TRINITY_DN76232_c1_g1|TR…	428	TRINITY_DN90107_c0_g1|TRINITY_DN73441_c3_g5|TRINITY_DN79430_c1_g6|TRINITY_DN73441_c3_g7|TRINITY_DN72937_c1_g6|TRINITY_DN72937_c1_g4|TRINITY_DN34254_c0_g1|TRINITY_DN79219_c2_g1|TRINITY_DN79430_c1_g4|TRINITY_DN50403_c0_g1|TRINITY_DN72027_c9_g2|TRINITY_DN65798_c0_g1|TRINITY_DN69940_c2_g1|TRINITY_DN69940_c2_g2|TRINITY_DN93952_c0_g1|TRINITY_DN52880_c0_g1|TRINITY_DN56125_c0_g2|TRINITY_DN60212_c0_g1|TRI…	132	TRINITY_DN61783_c0_g3|TRINITY_DN61783_c0_g1|TRINITY_DN66224_c0_g2|TRINITY_DN79430_c1_g5|TRINITY_DN74483_c3_g1|TRINITY_DN85803_c0_g5|TRINITY_DN93968_c0_g1|TRINITY_DN79430_c1_g9|TRINITY_DN56764_c0_g2|TRINITY_DN103120_c0_g1|TRINITY_DN84568_c0_g1|TRINITY_DN72937_c1_g2|TRINITY_DN78286_c2_g1|TRINITY_DN62950_c0_g1|TRINITY_DN59070_c0_g1|TRINITY_DN76573_c3_g1|TRINITY_DN36985_c0_g1|TRINITY_DN31491_c0_g2|TR…	296	yes
intraspecies interaction between organisms	GO:0051703	5.00486e-28	4.70184e-25	--	650	TRINITY_DN34717_c0_g1|TRINITY_DN34717_c0_g2|TRINITY_DN37743_c0_g1|TRINITY_DN69940_c2_g2|TRINITY_DN37290_c0_g2|TRINITY_DN69940_c2_g1|TRINITY_DN38128_c0_g1|TRINITY_DN95373_c0_g1|TRINITY_DN80184_c1_g1|TRINITY_DN65740_c2_g1|TRINITY_DN67379_c0_g1|TRINITY_DN19864_c0_g2|TRINITY_DN102451_c0_g1|TRINITY_DN65740_c2_g2|TRINITY_DN104953_c0_g1|TRINITY_DN16366_c0_g1|TRINITY_DN64371_c0_g1|TRINITY_DN73472_c3_g2|T…	320	TRINITY_DN71613_c0_g1|TRINITY_DN70293_c0_g1|TRINITY_DN73441_c3_g7|TRINITY_DN75857_c0_g1|TRINITY_DN74378_c0_g1|TRINITY_DN73883_c2_g8|TRINITY_DN71704_c0_g8|TRINITY_DN67221_c0_g4|TRINITY_DN71953_c0_g5|TRINITY_DN30433_c0_g2|TRINITY_DN74447_c1_g1|TRINITY_DN77329_c0_g1|TRINITY_DN36207_c0_g1|TRINITY_DN43554_c1_g1|TRINITY_DN75857_c0_g3|TRINITY_DN65740_c2_g1|TRINITY_DN69940_c2_g1|TRINITY_DN69940_c2_g2|TRI…	48	TRINITY_DN77355_c0_g13|TRINITY_DN80183_c0_g2|TRINITY_DN60607_c0_g1|TRINITY_DN74738_c4_g2|TRINITY_DN74738_c4_g1|TRINITY_DN60607_c0_g2|TRINITY_DN49963_c0_g1|TRINITY_DN56764_c0_g1|TRINITY_DN31445_c0_g1|TRINITY_DN99016_c0_g1|TRINITY_DN31086_c0_g2|TRINITY_DN66016_c0_g1|TRINITY_DN51709_c0_g2|TRINITY_DN77355_c0_g10|TRINITY_DN42885_c0_g1|TRINITY_DN46511_c0_g2|TRINITY_DN45443_c0_g1|TRINITY_DN66224_c0_g2|T…	272	yes
cellulose catabolic process	GO:0030245	1.21242e-26	1.04409e-23	GO:0016179	720	TRINITY_DN71597_c0_g1|TRINITY_DN69815_c0_g2|TRINITY_DN69815_c0_g1|TRINITY_DN91085_c0_g1|TRINITY_DN88500_c0_g1|TRINITY_DN55123_c0_g1|TRINITY_DN42552_c0_g1|TRINITY_DN29331_c0_g2|TRINITY_DN29331_c0_g1|TRINITY_DN104285_c0_g1|TRINITY_DN99728_c0_g1|TRINITY_DN23717_c0_g1|TRINITY_DN18846_c0_g1|TRINITY_DN41680_c0_g1|TRINITY_DN75998_c0_g4|TRINITY_DN41680_c0_g2|TRINITY_DN57767_c0_g2|TRINITY_DN88772_c0_g1|TR…	343	TRINITY_DN18248_c0_g1|TRINITY_DN72751_c0_g1|TRINITY_DN71233_c0_g2|TRINITY_DN89752_c0_g1|TRINITY_DN71233_c0_g1|TRINITY_DN24971_c0_g1|TRINITY_DN77031_c0_g1|TRINITY_DN77031_c0_g2|TRINITY_DN73551_c3_g1|TRINITY_DN85008_c2_g1|TRINITY_DN21098_c0_g1|TRINITY_DN94054_c0_g1|TRINITY_DN24753_c0_g1|TRINITY_DN71212_c0_g3|TRINITY_DN79008_c0_g3|TRINITY_DN34275_c0_g1|TRINITY_DN78005_c4_g1|TRINITY_DN73358_c0_g1|TRI…	140	TRINITY_DN91746_c0_g1|TRINITY_DN34655_c0_g4|TRINITY_DN38415_c0_g1|TRINITY_DN91566_c0_g1|TRINITY_DN32093_c0_g1|TRINITY_DN100414_c0_g1|TRINITY_DN67217_c1_g1|TRINITY_DN67217_c1_g2|TRINITY_DN89346_c0_g1|TRINITY_DN67802_c1_g1|TRINITY_DN73136_c0_g1|TRINITY_DN100283_c0_g1|TRINITY_DN77031_c0_g3|TRINITY_DN77031_c0_g4|TRINITY_DN94431_c0_g1|TRINITY_DN49249_c0_g1|TRINITY_DN36113_c0_g2|TRINITY_DN36113_c0_g3|T…	203	yes
beta-glucan catabolic process	GO:0051275	7.60297e-26	6.04378e-23	--	726	TRINITY_DN71597_c0_g1|TRINITY_DN69815_c0_g2|TRINITY_DN69815_c0_g1|TRINITY_DN91085_c0_g1|TRINITY_DN88500_c0_g1|TRINITY_DN64048_c0_g1|TRINITY_DN42552_c0_g1|TRINITY_DN29331_c0_g2|TRINITY_DN29331_c0_g1|TRINITY_DN104285_c0_g1|TRINITY_DN99728_c0_g1|TRINITY_DN23717_c0_g1|TRINITY_DN18846_c0_g1|TRINITY_DN41680_c0_g1|TRINITY_DN75998_c0_g4|TRINITY_DN41680_c0_g2|TRINITY_DN57767_c0_g2|TRINITY_DN88772_c0_g1|TR…	343	TRINITY_DN18248_c0_g1|TRINITY_DN72751_c0_g1|TRINITY_DN71233_c0_g2|TRINITY_DN89752_c0_g1|TRINITY_DN71233_c0_g1|TRINITY_DN24971_c0_g1|TRINITY_DN77031_c0_g1|TRINITY_DN77031_c0_g2|TRINITY_DN73551_c3_g1|TRINITY_DN85008_c2_g1|TRINITY_DN21098_c0_g1|TRINITY_DN94054_c0_g1|TRINITY_DN24753_c0_g1|TRINITY_DN71212_c0_g3|TRINITY_DN79008_c0_g3|TRINITY_DN34275_c0_g1|TRINITY_DN78005_c4_g1|TRINITY_DN73358_c0_g1|TRI…	140	TRINITY_DN91746_c0_g1|TRINITY_DN34655_c0_g4|TRINITY_DN38415_c0_g1|TRINITY_DN91566_c0_g1|TRINITY_DN32093_c0_g1|TRINITY_DN100414_c0_g1|TRINITY_DN67217_c1_g1|TRINITY_DN67217_c1_g2|TRINITY_DN89346_c0_g1|TRINITY_DN67802_c1_g1|TRINITY_DN73136_c0_g1|TRINITY_DN100283_c0_g1|TRINITY_DN77031_c0_g3|TRINITY_DN77031_c0_g4|TRINITY_DN94431_c0_g1|TRINITY_DN49249_c0_g1|TRINITY_DN36113_c0_g2|TRINITY_DN36113_c0_g3|T…	203	yes
regulation of actin filament organization	GO:0110053	1.11667e-25	8.24263e-23	--	635	TRINITY_DN61703_c0_g1|TRINITY_DN52741_c0_g1|TRINITY_DN61703_c0_g3|TRINITY_DN61703_c0_g2|TRINITY_DN69940_c2_g2|TRINITY_DN75064_c3_g2|TRINITY_DN75064_c3_g1|TRINITY_DN69940_c2_g1|TRINITY_DN27447_c0_g1|TRINITY_DN89090_c0_g1|TRINITY_DN74757_c2_g4|TRINITY_DN29090_c0_g1|TRINITY_DN1764_c0_g2|TRINITY_DN84568_c0_g1|TRINITY_DN70584_c2_g3|TRINITY_DN37341_c0_g1|TRINITY_DN60816_c0_g1|TRINITY_DN65740_c2_g2|TRIN…	308	TRINITY_DN73441_c3_g2|TRINITY_DN90107_c0_g1|TRINITY_DN73441_c3_g5|TRINITY_DN73441_c3_g7|TRINITY_DN72937_c1_g6|TRINITY_DN72937_c1_g4|TRINITY_DN34254_c0_g1|TRINITY_DN64830_c0_g2|TRINITY_DN60816_c0_g1|TRINITY_DN72027_c9_g2|TRINITY_DN62633_c0_g1|TRINITY_DN69940_c2_g1|TRINITY_DN69940_c2_g2|TRINITY_DN52880_c0_g1|TRINITY_DN56125_c0_g3|TRINITY_DN56125_c0_g2|TRINITY_DN66330_c0_g6|TRINITY_DN27447_c0_g1|TRI…	93	TRINITY_DN61783_c0_g3|TRINITY_DN60607_c0_g4|TRINITY_DN61783_c0_g1|TRINITY_DN99481_c0_g1|TRINITY_DN74483_c3_g2|TRINITY_DN74483_c3_g1|TRINITY_DN51908_c0_g2|TRINITY_DN93968_c0_g1|TRINITY_DN56764_c0_g1|TRINITY_DN56764_c0_g2|TRINITY_DN84568_c0_g1|TRINITY_DN72937_c1_g2|TRINITY_DN48262_c0_g1|TRINITY_DN80765_c2_g4|TRINITY_DN36985_c0_g1|TRINITY_DN31491_c0_g1|TRINITY_DN31491_c0_g2|TRINITY_DN51908_c0_g1|TRI…	215	yes
taxis	GO:0042330	3.73453e-24	2.57284e-21	--	390	TRINITY_DN60942_c0_g1|TRINITY_DN71699_c3_g3|TRINITY_DN71699_c3_g2|TRINITY_DN35720_c0_g1|TRINITY_DN38128_c0_g1|TRINITY_DN93827_c0_g1|TRINITY_DN54914_c0_g3|TRINITY_DN47536_c0_g2|TRINITY_DN19864_c0_g2|TRINITY_DN102451_c0_g1|TRINITY_DN65174_c0_g2|TRINITY_DN61550_c0_g2|TRINITY_DN37452_c0_g1|TRINITY_DN71699_c1_g1|TRINITY_DN82195_c4_g6|TRINITY_DN73128_c1_g2|TRINITY_DN82195_c4_g3|TRINITY_DN37088_c0_g1|TR…	208	TRINITY_DN65174_c0_g2|TRINITY_DN67953_c0_g1|TRINITY_DN39913_c0_g2|TRINITY_DN71120_c0_g1|TRINITY_DN35720_c0_g1|TRINITY_DN72027_c9_g2|TRINITY_DN56726_c1_g2|TRINITY_DN47546_c0_g4|TRINITY_DN72380_c5_g2|TRINITY_DN73128_c1_g2|TRINITY_DN72054_c4_g7|TRINITY_DN69535_c1_g6|TRINITY_DN67585_c0_g1|TRINITY_DN102451_c0_g1|TRINITY_DN77834_c5_g3|TRINITY_DN71699_c1_g1|TRINITY_DN53080_c0_g1|TRINITY_DN47536_c0_g2|TR…	24	TRINITY_DN61783_c0_g3|TRINITY_DN60607_c0_g4|TRINITY_DN80183_c0_g2|TRINITY_DN56233_c0_g1|TRINITY_DN60607_c0_g2|TRINITY_DN31445_c0_g1|TRINITY_DN61783_c0_g1|TRINITY_DN59951_c0_g1|TRINITY_DN76040_c1_g3|TRINITY_DN71050_c0_g2|TRINITY_DN42885_c0_g1|TRINITY_DN60607_c0_g1|TRINITY_DN91823_c0_g1|TRINITY_DN56404_c0_g1|TRINITY_DN3374_c0_g1|TRINITY_DN81831_c0_g1|TRINITY_DN81831_c0_g2|TRINITY_DN60942_c0_g1|TRIN…	184	yes
regulation of actin polymerization or depolymerization	GO:0008064	1.19938e-23	7.2908e-21	--	584	TRINITY_DN61703_c0_g1|TRINITY_DN52741_c0_g1|TRINITY_DN61703_c0_g3|TRINITY_DN61703_c0_g2|TRINITY_DN69940_c2_g2|TRINITY_DN71699_c3_g4|TRINITY_DN75064_c3_g1|TRINITY_DN69940_c2_g1|TRINITY_DN89090_c0_g1|TRINITY_DN74757_c2_g4|TRINITY_DN29090_c0_g1|TRINITY_DN1764_c0_g2|TRINITY_DN70584_c2_g3|TRINITY_DN37341_c0_g1|TRINITY_DN60816_c0_g1|TRINITY_DN65740_c2_g2|TRINITY_DN59962_c0_g1|TRINITY_DN53530_c0_g1|TRIN…	283	TRINITY_DN73441_c3_g2|TRINITY_DN90107_c0_g1|TRINITY_DN73441_c3_g5|TRINITY_DN73441_c3_g7|TRINITY_DN72937_c1_g6|TRINITY_DN72937_c1_g4|TRINITY_DN34254_c0_g1|TRINITY_DN64830_c0_g2|TRINITY_DN60816_c0_g1|TRINITY_DN62633_c0_g1|TRINITY_DN69940_c2_g1|TRINITY_DN69940_c2_g2|TRINITY_DN52880_c0_g1|TRINITY_DN56125_c0_g3|TRINITY_DN56125_c0_g2|TRINITY_DN66330_c0_g6|TRINITY_DN27447_c0_g1|TRINITY_DN72663_c2_g8|TRI…	88	TRINITY_DN61783_c0_g3|TRINITY_DN60607_c0_g4|TRINITY_DN61783_c0_g1|TRINITY_DN51908_c0_g1|TRINITY_DN74483_c3_g2|TRINITY_DN74483_c3_g1|TRINITY_DN51908_c0_g2|TRINITY_DN93968_c0_g1|TRINITY_DN56764_c0_g1|TRINITY_DN56764_c0_g2|TRINITY_DN72937_c1_g2|TRINITY_DN48262_c0_g1|TRINITY_DN36985_c0_g1|TRINITY_DN31491_c0_g1|TRINITY_DN31491_c0_g2|TRINITY_DN99481_c0_g1|TRINITY_DN72027_c5_g3|TRINITY_DN95806_c0_g1|TRI…	195	yes
regulation of actin filament length	GO:0030832	1.19938e-23	7.2908e-21	--	584	TRINITY_DN61703_c0_g1|TRINITY_DN52741_c0_g1|TRINITY_DN61703_c0_g3|TRINITY_DN61703_c0_g2|TRINITY_DN69940_c2_g2|TRINITY_DN75064_c3_g2|TRINITY_DN75064_c3_g1|TRINITY_DN69940_c2_g1|TRINITY_DN89090_c0_g1|TRINITY_DN74757_c2_g4|TRINITY_DN29090_c0_g1|TRINITY_DN1764_c0_g2|TRINITY_DN70584_c2_g3|TRINITY_DN37341_c0_g1|TRINITY_DN60816_c0_g1|TRINITY_DN65740_c2_g2|TRINITY_DN59962_c0_g1|TRINITY_DN53530_c0_g1|TRIN…	283	TRINITY_DN73441_c3_g2|TRINITY_DN90107_c0_g1|TRINITY_DN73441_c3_g5|TRINITY_DN73441_c3_g7|TRINITY_DN72937_c1_g6|TRINITY_DN72937_c1_g4|TRINITY_DN34254_c0_g1|TRINITY_DN64830_c0_g2|TRINITY_DN60816_c0_g1|TRINITY_DN62633_c0_g1|TRINITY_DN69940_c2_g1|TRINITY_DN69940_c2_g2|TRINITY_DN52880_c0_g1|TRINITY_DN56125_c0_g3|TRINITY_DN56125_c0_g2|TRINITY_DN66330_c0_g6|TRINITY_DN27447_c0_g1|TRINITY_DN72663_c2_g8|TRI…	88	TRINITY_DN61783_c0_g3|TRINITY_DN60607_c0_g4|TRINITY_DN61783_c0_g1|TRINITY_DN51908_c0_g1|TRINITY_DN74483_c3_g2|TRINITY_DN74483_c3_g1|TRINITY_DN51908_c0_g2|TRINITY_DN93968_c0_g1|TRINITY_DN56764_c0_g1|TRINITY_DN56764_c0_g2|TRINITY_DN72937_c1_g2|TRINITY_DN48262_c0_g1|TRINITY_DN36985_c0_g1|TRINITY_DN31491_c0_g1|TRINITY_DN31491_c0_g2|TRINITY_DN99481_c0_g1|TRINITY_DN72027_c5_g3|TRINITY_DN95806_c0_g1|TRI…	195	yes
regulation of actin cytoskeleton organization	GO:0032956	1.29344e-23	7.42579e-21	--	749	TRINITY_DN69940_c2_g2|TRINITY_DN69940_c2_g1|TRINITY_DN53530_c0_g1|TRINITY_DN57035_c0_g1|TRINITY_DN44250_c0_g2|TRINITY_DN82195_c4_g1|TRINITY_DN82195_c4_g3|TRINITY_DN38342_c0_g1|TRINITY_DN71115_c2_g1|TRINITY_DN77980_c1_g8|TRINITY_DN23545_c0_g1|TRINITY_DN74483_c2_g1|TRINITY_DN62950_c0_g1|TRINITY_DN76232_c1_g1|TRINITY_DN63489_c0_g1|TRINITY_DN80752_c1_g5|TRINITY_DN60607_c0_g4|TRINITY_DN95623_c0_g1|TRI…	345	TRINITY_DN73441_c3_g2|TRINITY_DN90107_c0_g1|TRINITY_DN73441_c3_g5|TRINITY_DN73441_c3_g7|TRINITY_DN72937_c1_g6|TRINITY_DN72937_c1_g4|TRINITY_DN34254_c0_g1|TRINITY_DN64830_c0_g2|TRINITY_DN80961_c3_g3|TRINITY_DN60816_c0_g1|TRINITY_DN72027_c9_g2|TRINITY_DN62633_c0_g1|TRINITY_DN69940_c2_g1|TRINITY_DN69940_c2_g2|TRINITY_DN52880_c0_g1|TRINITY_DN56125_c0_g3|TRINITY_DN56125_c0_g2|TRINITY_DN66330_c0_g6|TRI…	102	TRINITY_DN61783_c0_g3|TRINITY_DN60607_c0_g4|TRINITY_DN61783_c0_g1|TRINITY_DN99764_c0_g1|TRINITY_DN74483_c3_g2|TRINITY_DN74483_c3_g1|TRINITY_DN51908_c0_g2|TRINITY_DN93968_c0_g1|TRINITY_DN56764_c0_g1|TRINITY_DN56764_c0_g2|TRINITY_DN84568_c0_g1|TRINITY_DN72937_c1_g2|TRINITY_DN48262_c0_g1|TRINITY_DN80765_c2_g4|TRINITY_DN36985_c0_g1|TRINITY_DN31491_c0_g1|TRINITY_DN31491_c0_g2|TRINITY_DN99481_c0_g1|TRI…	243	yes
regulation of actin filament-based process	GO:0032970	2.89168e-23	1.49413e-20	--	760	TRINITY_DN69940_c2_g2|TRINITY_DN69940_c2_g1|TRINITY_DN53530_c0_g1|TRINITY_DN44250_c0_g2|TRINITY_DN82195_c4_g1|TRINITY_DN82195_c4_g3|TRINITY_DN38342_c0_g1|TRINITY_DN71115_c2_g1|TRINITY_DN77980_c1_g8|TRINITY_DN23545_c0_g1|TRINITY_DN74483_c2_g1|TRINITY_DN62950_c0_g1|TRINITY_DN76232_c1_g1|TRINITY_DN63489_c0_g1|TRINITY_DN80752_c1_g5|TRINITY_DN60607_c0_g4|TRINITY_DN95623_c0_g1|TRINITY_DN17003_c0_g1|TRI…	348	TRINITY_DN73441_c3_g2|TRINITY_DN90107_c0_g1|TRINITY_DN73441_c3_g5|TRINITY_DN73441_c3_g7|TRINITY_DN72937_c1_g6|TRINITY_DN72937_c1_g4|TRINITY_DN34254_c0_g1|TRINITY_DN64830_c0_g2|TRINITY_DN80961_c3_g3|TRINITY_DN60816_c0_g1|TRINITY_DN72027_c9_g2|TRINITY_DN56726_c1_g2|TRINITY_DN62633_c0_g1|TRINITY_DN69940_c2_g1|TRINITY_DN69940_c2_g2|TRINITY_DN52880_c0_g1|TRINITY_DN56125_c0_g3|TRINITY_DN56125_c0_g2|TRI…	103	TRINITY_DN61783_c0_g3|TRINITY_DN60607_c0_g4|TRINITY_DN61783_c0_g1|TRINITY_DN99764_c0_g1|TRINITY_DN74483_c3_g2|TRINITY_DN74483_c3_g1|TRINITY_DN51908_c0_g2|TRINITY_DN93968_c0_g1|TRINITY_DN56764_c0_g1|TRINITY_DN56764_c0_g2|TRINITY_DN84568_c0_g1|TRINITY_DN72937_c1_g2|TRINITY_DN48262_c0_g1|TRINITY_DN80765_c2_g4|TRINITY_DN36985_c0_g1|TRINITY_DN31491_c0_g1|TRINITY_DN31491_c0_g2|TRINITY_DN99481_c0_g1|TRI…	245	yes
regulation of supramolecular fiber organization	GO:1902903	2.86761e-23	1.49413e-20	--	682	TRINITY_DN61703_c0_g1|TRINITY_DN52741_c0_g1|TRINITY_DN61703_c0_g3|TRINITY_DN61703_c0_g2|TRINITY_DN69940_c2_g2|TRINITY_DN71699_c3_g4|TRINITY_DN75064_c3_g1|TRINITY_DN69940_c2_g1|TRINITY_DN89090_c0_g1|TRINITY_DN74757_c2_g4|TRINITY_DN29090_c0_g1|TRINITY_DN71699_c3_g3|TRINITY_DN70584_c2_g3|TRINITY_DN70725_c0_g3|TRINITY_DN60816_c0_g1|TRINITY_DN65740_c2_g2|TRINITY_DN59962_c0_g1|TRINITY_DN53530_c0_g1|TRI…	319	TRINITY_DN73441_c3_g2|TRINITY_DN90107_c0_g1|TRINITY_DN73441_c3_g5|TRINITY_DN73441_c3_g7|TRINITY_DN72937_c1_g6|TRINITY_DN72937_c1_g4|TRINITY_DN34254_c0_g1|TRINITY_DN64830_c0_g2|TRINITY_DN60816_c0_g1|TRINITY_DN72027_c9_g2|TRINITY_DN62633_c0_g1|TRINITY_DN69940_c2_g1|TRINITY_DN69940_c2_g2|TRINITY_DN52880_c0_g1|TRINITY_DN56125_c0_g3|TRINITY_DN56125_c0_g2|TRINITY_DN66330_c0_g6|TRINITY_DN27447_c0_g1|TRI…	97	TRINITY_DN61783_c0_g3|TRINITY_DN60607_c0_g4|TRINITY_DN61783_c0_g1|TRINITY_DN99764_c0_g1|TRINITY_DN74483_c3_g2|TRINITY_DN74483_c3_g1|TRINITY_DN51908_c0_g2|TRINITY_DN93968_c0_g1|TRINITY_DN56764_c0_g1|TRINITY_DN56764_c0_g2|TRINITY_DN84568_c0_g1|TRINITY_DN72937_c1_g2|TRINITY_DN48262_c0_g1|TRINITY_DN80765_c2_g4|TRINITY_DN36985_c0_g1|TRINITY_DN31491_c0_g1|TRINITY_DN31491_c0_g2|TRINITY_DN61025_c0_g1|TRI…	222	yes
regulation of protein polymerization	GO:0032271	3.85967e-23	1.89933e-20	--	585	TRINITY_DN61703_c0_g1|TRINITY_DN52741_c0_g1|TRINITY_DN61703_c0_g3|TRINITY_DN61703_c0_g2|TRINITY_DN69940_c2_g2|TRINITY_DN75064_c3_g2|TRINITY_DN75064_c3_g1|TRINITY_DN69940_c2_g1|TRINITY_DN89090_c0_g1|TRINITY_DN29090_c0_g1|TRINITY_DN1764_c0_g2|TRINITY_DN71699_c3_g3|TRINITY_DN70584_c2_g3|TRINITY_DN37341_c0_g1|TRINITY_DN60816_c0_g1|TRINITY_DN65740_c2_g2|TRINITY_DN59962_c0_g1|TRINITY_DN53530_c0_g1|TRIN…	282	TRINITY_DN73441_c3_g2|TRINITY_DN90107_c0_g1|TRINITY_DN73441_c3_g5|TRINITY_DN73441_c3_g7|TRINITY_DN72937_c1_g6|TRINITY_DN72937_c1_g4|TRINITY_DN34254_c0_g1|TRINITY_DN64830_c0_g2|TRINITY_DN60816_c0_g1|TRINITY_DN72027_c9_g2|TRINITY_DN62633_c0_g1|TRINITY_DN69940_c2_g1|TRINITY_DN69940_c2_g2|TRINITY_DN56125_c0_g3|TRINITY_DN56125_c0_g2|TRINITY_DN66330_c0_g6|TRINITY_DN27447_c0_g1|TRINITY_DN72663_c2_g8|TRI…	88	TRINITY_DN60607_c0_g4|TRINITY_DN99481_c0_g1|TRINITY_DN74483_c3_g2|TRINITY_DN74483_c3_g1|TRINITY_DN51908_c0_g2|TRINITY_DN93968_c0_g1|TRINITY_DN56764_c0_g1|TRINITY_DN56764_c0_g2|TRINITY_DN72937_c1_g2|TRINITY_DN48262_c0_g1|TRINITY_DN80765_c2_g4|TRINITY_DN31491_c0_g1|TRINITY_DN31491_c0_g2|TRINITY_DN74483_c3_g3|TRINITY_DN82195_c4_g1|TRINITY_DN95806_c0_g1|TRINITY_DN75064_c3_g1|TRINITY_DN75064_c3_g2|TRI…	194	yes
regulation of actin filament polymerization	GO:0030833	2.31974e-22	1.08964e-19	--	533	TRINITY_DN61703_c0_g1|TRINITY_DN52741_c0_g1|TRINITY_DN61703_c0_g3|TRINITY_DN61703_c0_g2|TRINITY_DN69940_c2_g2|TRINITY_DN71699_c3_g4|TRINITY_DN75064_c3_g1|TRINITY_DN69940_c2_g1|TRINITY_DN27447_c0_g1|TRINITY_DN89090_c0_g1|TRINITY_DN29090_c0_g1|TRINITY_DN1764_c0_g2|TRINITY_DN70584_c2_g3|TRINITY_DN37341_c0_g1|TRINITY_DN60816_c0_g1|TRINITY_DN65740_c2_g2|TRINITY_DN64970_c2_g2|TRINITY_DN53530_c0_g1|TRIN…	260	TRINITY_DN76380_c1_g3|TRINITY_DN59454_c0_g1|TRINITY_DN21834_c0_g1|TRINITY_DN90107_c0_g1|TRINITY_DN67701_c1_g1|TRINITY_DN73441_c3_g7|TRINITY_DN55517_c0_g1|TRINITY_DN72937_c1_g4|TRINITY_DN74594_c1_g2|TRINITY_DN73441_c3_g2|TRINITY_DN101763_c0_g1|TRINITY_DN69199_c0_g1|TRINITY_DN70725_c0_g1|TRINITY_DN74594_c0_g1|TRINITY_DN76558_c1_g1|TRINITY_DN63866_c0_g1|TRINITY_DN70584_c2_g3|TRINITY_DN100422_c0_g1|T…	82	TRINITY_DN60607_c0_g4|TRINITY_DN51908_c0_g1|TRINITY_DN74483_c3_g2|TRINITY_DN74483_c3_g1|TRINITY_DN51908_c0_g2|TRINITY_DN93968_c0_g1|TRINITY_DN56764_c0_g1|TRINITY_DN56764_c0_g2|TRINITY_DN72937_c1_g2|TRINITY_DN48262_c0_g1|TRINITY_DN31491_c0_g1|TRINITY_DN31491_c0_g2|TRINITY_DN99481_c0_g1|TRINITY_DN74198_c0_g1|TRINITY_DN95806_c0_g1|TRINITY_DN75064_c3_g1|TRINITY_DN75064_c3_g2|TRINITY_DN72937_c1_g10|TR…	178	yes
organonitrogen compound metabolic process	GO:1901564	3.29829e-22	1.48194e-19	--	27525	TRINITY_DN61679_c0_g2|TRINITY_DN85272_c2_g2|TRINITY_DN2633_c0_g1|TRINITY_DN91757_c0_g1|TRINITY_DN85020_c3_g1|TRINITY_DN48748_c0_g1|TRINITY_DN15022_c0_g1|TRINITY_DN24629_c0_g2|TRINITY_DN7068_c0_g1|TRINITY_DN7068_c0_g2|TRINITY_DN93759_c0_g1|TRINITY_DN53573_c0_g1|TRINITY_DN85481_c8_g1|TRINITY_DN73388_c2_g7|TRINITY_DN71554_c3_g1|TRINITY_DN54296_c1_g1|TRINITY_DN59950_c0_g2|TRINITY_DN35027_c0_g2|TRINIT…	8562	TRINITY_DN78029_c1_g1|TRINITY_DN72354_c5_g8|TRINITY_DN30419_c0_g1|TRINITY_DN75594_c2_g5|TRINITY_DN53340_c0_g1|TRINITY_DN68347_c0_g1|TRINITY_DN79485_c4_g1|TRINITY_DN15752_c0_g1|TRINITY_DN71773_c0_g2|TRINITY_DN72354_c5_g6|TRINITY_DN99131_c0_g1|TRINITY_DN65786_c0_g7|TRINITY_DN68826_c0_g2|TRINITY_DN67700_c0_g1|TRINITY_DN71405_c1_g1|TRINITY_DN73964_c4_g1|TRINITY_DN77392_c1_g3|TRINITY_DN73497_c0_g1|TRI…	3406	TRINITY_DN80050_c0_g1|TRINITY_DN14313_c0_g2|TRINITY_DN88211_c0_g1|TRINITY_DN34786_c0_g1|TRINITY_DN24367_c0_g1|TRINITY_DN78657_c1_g14|TRINITY_DN89129_c0_g1|TRINITY_DN73790_c3_g5|TRINITY_DN69022_c3_g2|TRINITY_DN83383_c2_g17|TRINITY_DN83383_c2_g16|TRINITY_DN33522_c0_g2|TRINITY_DN76655_c0_g2|TRINITY_DN35069_c0_g1|TRINITY_DN75245_c2_g1|TRINITY_DN100126_c0_g1|TRINITY_DN35069_c0_g2|TRINITY_DN77392_c1_g1…	5156	yes
carbohydrate metabolic process	GO:0005975	1.5411e-21	6.63574e-19	GO:0044723	6769	TRINITY_DN71597_c0_g1|TRINITY_DN103242_c0_g1|TRINITY_DN69815_c0_g2|TRINITY_DN69815_c0_g1|TRINITY_DN91085_c0_g1|TRINITY_DN88500_c0_g1|TRINITY_DN77947_c0_g7|TRINITY_DN67838_c0_g3|TRINITY_DN74500_c0_g1|TRINITY_DN68915_c0_g2|TRINITY_DN79605_c2_g1|TRINITY_DN80994_c2_g1|TRINITY_DN100320_c0_g1|TRINITY_DN79605_c2_g2|TRINITY_DN21804_c0_g1|TRINITY_DN79605_c2_g4|TRINITY_DN83383_c2_g4|TRINITY_DN83383_c2_g9|T…	2300	TRINITY_DN78029_c1_g1|TRINITY_DN78376_c0_g9|TRINITY_DN73714_c3_g3|TRINITY_DN68688_c0_g1|TRINITY_DN79723_c1_g3|TRINITY_DN73714_c3_g6|TRINITY_DN64147_c0_g2|TRINITY_DN64147_c0_g1|TRINITY_DN18248_c0_g1|TRINITY_DN78376_c0_g4|TRINITY_DN78376_c0_g6|TRINITY_DN71233_c0_g2|TRINITY_DN71364_c1_g1|TRINITY_DN88049_c0_g1|TRINITY_DN71233_c0_g1|TRINITY_DN78038_c1_g1|TRINITY_DN68826_c0_g2|TRINITY_DN77031_c0_g1|TRI…	972	TRINITY_DN72608_c0_g1|TRINITY_DN75583_c1_g9|TRINITY_DN72441_c0_g2|TRINITY_DN79723_c1_g2|TRINITY_DN79723_c1_g1|TRINITY_DN24367_c0_g1|TRINITY_DN91085_c0_g1|TRINITY_DN76972_c1_g4|TRINITY_DN100228_c0_g1|TRINITY_DN79723_c1_g5|TRINITY_DN75583_c1_g4|TRINITY_DN78605_c1_g1|TRINITY_DN37373_c0_g1|TRINITY_DN78605_c1_g5|TRINITY_DN25556_c0_g1|TRINITY_DN100399_c0_g1|TRINITY_DN78605_c1_g6|TRINITY_DN15161_c0_g2|T…	1328	yes
cellulose metabolic process	GO:0030243	2.36066e-21	9.75804e-19	GO:0016177	815	TRINITY_DN71597_c0_g1|TRINITY_DN69815_c0_g2|TRINITY_DN69815_c0_g1|TRINITY_DN91085_c0_g1|TRINITY_DN88500_c0_g1|TRINITY_DN64048_c0_g1|TRINITY_DN42552_c0_g1|TRINITY_DN29331_c0_g2|TRINITY_DN29331_c0_g1|TRINITY_DN104285_c0_g1|TRINITY_DN99728_c0_g1|TRINITY_DN23717_c0_g1|TRINITY_DN18846_c0_g1|TRINITY_DN41680_c0_g1|TRINITY_DN75998_c0_g4|TRINITY_DN41680_c0_g2|TRINITY_DN57767_c0_g2|TRINITY_DN88772_c0_g1|TR…	362	TRINITY_DN18248_c0_g1|TRINITY_DN72751_c0_g1|TRINITY_DN71233_c0_g2|TRINITY_DN89752_c0_g1|TRINITY_DN71233_c0_g1|TRINITY_DN24971_c0_g1|TRINITY_DN77031_c0_g1|TRINITY_DN77031_c0_g2|TRINITY_DN73551_c3_g1|TRINITY_DN85008_c2_g1|TRINITY_DN21098_c0_g1|TRINITY_DN94054_c0_g1|TRINITY_DN24753_c0_g1|TRINITY_DN71212_c0_g3|TRINITY_DN79008_c0_g3|TRINITY_DN34275_c0_g1|TRINITY_DN78005_c4_g1|TRINITY_DN73358_c0_g1|TRI…	150	TRINITY_DN31086_c0_g1|TRINITY_DN31086_c0_g2|TRINITY_DN91746_c0_g1|TRINITY_DN34655_c0_g4|TRINITY_DN38415_c0_g1|TRINITY_DN91566_c0_g1|TRINITY_DN32093_c0_g1|TRINITY_DN100414_c0_g1|TRINITY_DN67217_c1_g1|TRINITY_DN67217_c1_g2|TRINITY_DN89346_c0_g1|TRINITY_DN67802_c1_g1|TRINITY_DN103225_c0_g1|TRINITY_DN75734_c1_g1|TRINITY_DN100283_c0_g1|TRINITY_DN77031_c0_g3|TRINITY_DN77031_c0_g4|TRINITY_DN94431_c0_g1|…	212	yes
supramolecular fiber organization	GO:0097435	2.63806e-21	1.04853e-18	GO:0043206	1084	TRINITY_DN69940_c2_g2|TRINITY_DN69940_c2_g1|TRINITY_DN33941_c0_g2|TRINITY_DN33941_c0_g3|TRINITY_DN33941_c0_g1|TRINITY_DN33941_c0_g4|TRINITY_DN43287_c0_g1|TRINITY_DN48262_c0_g1|TRINITY_DN82195_c4_g6|TRINITY_DN82195_c4_g1|TRINITY_DN82195_c4_g3|TRINITY_DN38342_c0_g1|TRINITY_DN62671_c0_g1|TRINITY_DN41933_c0_g2|TRINITY_DN80121_c4_g1|TRINITY_DN74523_c0_g10|TRINITY_DN74483_c2_g1|TRINITY_DN9317_c0_g1|TRI…	458	TRINITY_DN90107_c0_g1|TRINITY_DN73441_c3_g5|TRINITY_DN79430_c1_g6|TRINITY_DN73441_c3_g7|TRINITY_DN72937_c1_g6|TRINITY_DN72937_c1_g4|TRINITY_DN34254_c0_g1|TRINITY_DN79219_c2_g1|TRINITY_DN79430_c1_g4|TRINITY_DN50403_c0_g1|TRINITY_DN72027_c9_g2|TRINITY_DN76106_c3_g1|TRINITY_DN65798_c0_g1|TRINITY_DN77122_c0_g1|TRINITY_DN69940_c2_g1|TRINITY_DN69940_c2_g2|TRINITY_DN93952_c0_g1|TRINITY_DN52880_c0_g1|TRI…	144	TRINITY_DN61783_c0_g3|TRINITY_DN61783_c0_g1|TRINITY_DN1764_c0_g2|TRINITY_DN66224_c0_g2|TRINITY_DN79430_c1_g5|TRINITY_DN74483_c3_g1|TRINITY_DN85803_c0_g5|TRINITY_DN93968_c0_g1|TRINITY_DN79430_c1_g9|TRINITY_DN56764_c0_g2|TRINITY_DN103120_c0_g1|TRINITY_DN84568_c0_g1|TRINITY_DN47956_c0_g1|TRINITY_DN78286_c2_g1|TRINITY_DN48262_c0_g1|TRINITY_DN59070_c0_g1|TRINITY_DN76573_c3_g1|TRINITY_DN36985_c0_g1|TRI…	314	yes
translational elongation	GO:0006414	1.34307e-20	5.14048e-18	GO:0006442|GO:0006455	666	TRINITY_DN78745_c1_g3|TRINITY_DN91359_c0_g1|TRINITY_DN3787_c0_g1|TRINITY_DN75419_c2_g5|TRINITY_DN77740_c7_g3|TRINITY_DN84110_c2_g8|TRINITY_DN84110_c2_g9|TRINITY_DN72315_c6_g1|TRINITY_DN75439_c6_g2|TRINITY_DN84110_c2_g1|TRINITY_DN84110_c2_g3|TRINITY_DN79219_c3_g1|TRINITY_DN78317_c1_g1|TRINITY_DN84110_c2_g6|TRINITY_DN84110_c2_g7|TRINITY_DN83180_c5_g3|TRINITY_DN85396_c0_g2|TRINITY_DN73862_c3_g4|TRIN…	305	TRINITY_DN83075_c0_g1|TRINITY_DN79219_c2_g1|TRINITY_DN83180_c5_g3|TRINITY_DN82961_c1_g4|TRINITY_DN82961_c1_g7|TRINITY_DN73862_c3_g4|TRINITY_DN80337_c1_g2|TRINITY_DN81860_c0_g1|TRINITY_DN80207_c0_g2|TRINITY_DN76460_c4_g9|TRINITY_DN76460_c4_g8|TRINITY_DN15527_c0_g1|TRINITY_DN75439_c4_g8|TRINITY_DN82961_c1_g11|TRINITY_DN75439_c4_g1|TRINITY_DN75439_c3_g1|TRINITY_DN75439_c4_g5|TRINITY_DN75442_c1_g1|TR…	91	TRINITY_DN43836_c0_g3|TRINITY_DN74047_c4_g1|TRINITY_DN85884_c1_g2|TRINITY_DN85884_c1_g3|TRINITY_DN68033_c0_g1|TRINITY_DN75752_c1_g7|TRINITY_DN85884_c1_g4|TRINITY_DN78317_c1_g1|TRINITY_DN79521_c1_g4|TRINITY_DN79659_c0_g1|TRINITY_DN75165_c4_g1|TRINITY_DN37036_c0_g1|TRINITY_DN84619_c6_g1|TRINITY_DN84110_c2_g10|TRINITY_DN56156_c0_g1|TRINITY_DN72315_c3_g2|TRINITY_DN74407_c2_g2|TRINITY_DN82961_c1_g6|TR…	214	yes
polysaccharide catabolic process	GO:0000272	1.99017e-19	7.34514e-17	--	1749	TRINITY_DN71597_c0_g1|TRINITY_DN52971_c0_g1|TRINITY_DN103242_c0_g1|TRINITY_DN69815_c0_g2|TRINITY_DN69815_c0_g1|TRINITY_DN91085_c0_g1|TRINITY_DN88500_c0_g1|TRINITY_DN97586_c0_g1|TRINITY_DN64048_c0_g1|TRINITY_DN72664_c1_g1|TRINITY_DN29331_c0_g2|TRINITY_DN29331_c0_g1|TRINITY_DN104285_c0_g1|TRINITY_DN80994_c2_g1|TRINITY_DN62519_c0_g1|TRINITY_DN51537_c0_g1|TRINITY_DN23717_c0_g1|TRINITY_DN18846_c0_g1|T…	678	TRINITY_DN78029_c1_g1|TRINITY_DN36713_c0_g1|TRINITY_DN89004_c0_g1|TRINITY_DN43024_c0_g1|TRINITY_DN7384_c0_g1|TRINITY_DN68386_c0_g1|TRINITY_DN73551_c2_g4|TRINITY_DN65760_c0_g1|TRINITY_DN18248_c0_g1|TRINITY_DN72751_c0_g1|TRINITY_DN71233_c0_g2|TRINITY_DN89752_c0_g1|TRINITY_DN71233_c0_g1|TRINITY_DN84075_c4_g2|TRINITY_DN8651_c0_g1|TRINITY_DN84156_c2_g1|TRINITY_DN24971_c0_g1|TRINITY_DN77031_c0_g1|TRINI…	312	TRINITY_DN35069_c0_g1|TRINITY_DN35069_c0_g2|TRINITY_DN77031_c0_g4|TRINITY_DN36113_c0_g2|TRINITY_DN36113_c0_g3|TRINITY_DN25817_c0_g1|TRINITY_DN78005_c3_g2|TRINITY_DN42834_c0_g1|TRINITY_DN98274_c0_g1|TRINITY_DN81762_c2_g11|TRINITY_DN40607_c0_g2|TRINITY_DN94676_c0_g1|TRINITY_DN59715_c0_g1|TRINITY_DN63910_c0_g1|TRINITY_DN91470_c0_g1|TRINITY_DN42265_c0_g1|TRINITY_DN15855_c0_g1|TRINITY_DN18846_c0_g1|TR…	366	yes
glucan catabolic process	GO:0009251	2.31905e-19	8.26382e-17	--	876	TRINITY_DN71597_c0_g1|TRINITY_DN69815_c0_g2|TRINITY_DN69815_c0_g1|TRINITY_DN91085_c0_g1|TRINITY_DN88500_c0_g1|TRINITY_DN64048_c0_g1|TRINITY_DN42552_c0_g1|TRINITY_DN29331_c0_g2|TRINITY_DN29331_c0_g1|TRINITY_DN104285_c0_g1|TRINITY_DN99728_c0_g1|TRINITY_DN51537_c0_g1|TRINITY_DN23717_c0_g1|TRINITY_DN18846_c0_g1|TRINITY_DN41680_c0_g1|TRINITY_DN75998_c0_g4|TRINITY_DN41680_c0_g2|TRINITY_DN57767_c0_g2|TR…	377	TRINITY_DN36713_c0_g1|TRINITY_DN18248_c0_g1|TRINITY_DN72751_c0_g1|TRINITY_DN71233_c0_g2|TRINITY_DN89752_c0_g1|TRINITY_DN71233_c0_g1|TRINITY_DN24971_c0_g1|TRINITY_DN77031_c0_g1|TRINITY_DN77031_c0_g2|TRINITY_DN73551_c3_g1|TRINITY_DN85008_c2_g1|TRINITY_DN21098_c0_g1|TRINITY_DN94054_c0_g1|TRINITY_DN24753_c0_g1|TRINITY_DN71212_c0_g3|TRINITY_DN79008_c0_g3|TRINITY_DN34275_c0_g1|TRINITY_DN78005_c4_g1|TRI…	159	TRINITY_DN91746_c0_g1|TRINITY_DN34655_c0_g4|TRINITY_DN38415_c0_g1|TRINITY_DN91566_c0_g1|TRINITY_DN32093_c0_g1|TRINITY_DN100414_c0_g1|TRINITY_DN67217_c1_g1|TRINITY_DN67217_c1_g2|TRINITY_DN89346_c0_g1|TRINITY_DN67802_c1_g1|TRINITY_DN73136_c0_g1|TRINITY_DN100283_c0_g1|TRINITY_DN77031_c0_g3|TRINITY_DN77031_c0_g4|TRINITY_DN94431_c0_g1|TRINITY_DN49249_c0_g1|TRINITY_DN36113_c0_g2|TRINITY_DN36113_c0_g3|T…	218	yes
actin polymerization or depolymerization	GO:0008154	2.83495e-19	9.76547e-17	--	358	TRINITY_DN71699_c3_g2|TRINITY_DN69940_c2_g2|TRINITY_DN97021_c0_g1|TRINITY_DN69940_c2_g1|TRINITY_DN74757_c2_g4|TRINITY_DN74757_c2_g2|TRINITY_DN37341_c0_g1|TRINITY_DN25345_c0_g1|TRINITY_DN104953_c0_g1|TRINITY_DN80056_c1_g1|TRINITY_DN59490_c0_g1|TRINITY_DN71115_c1_g1|TRINITY_DN71115_c2_g5|TRINITY_DN72937_c1_g2|TRINITY_DN94002_c0_g1|TRINITY_DN23032_c0_g1|TRINITY_DN103816_c0_g1|TRINITY_DN69940_c4_g1|T…	184	TRINITY_DN76380_c1_g3|TRINITY_DN76380_c1_g1|TRINITY_DN66065_c0_g3|TRINITY_DN90107_c0_g1|TRINITY_DN73441_c3_g5|TRINITY_DN72937_c1_g6|TRINITY_DN72937_c1_g4|TRINITY_DN29466_c0_g2|TRINITY_DN101763_c0_g1|TRINITY_DN62482_c0_g1|TRINITY_DN70725_c0_g1|TRINITY_DN103590_c0_g1|TRINITY_DN74594_c0_g1|TRINITY_DN100422_c0_g1|TRINITY_DN17003_c0_g1|TRINITY_DN74757_c2_g2|TRINITY_DN74757_c2_g4|TRINITY_DN72663_c2_g18…	58	TRINITY_DN61783_c0_g3|TRINITY_DN61783_c0_g1|TRINITY_DN66224_c0_g2|TRINITY_DN93968_c0_g1|TRINITY_DN56764_c0_g1|TRINITY_DN56764_c0_g2|TRINITY_DN72937_c1_g2|TRINITY_DN59070_c0_g1|TRINITY_DN67292_c0_g1|TRINITY_DN99481_c0_g1|TRINITY_DN65740_c2_g2|TRINITY_DN78524_c1_g1|TRINITY_DN72937_c1_g10|TRINITY_DN23032_c0_g1|TRINITY_DN91148_c0_g1|TRINITY_DN97781_c0_g1|TRINITY_DN77834_c1_g1|TRINITY_DN94772_c0_g1|TR…	126	yes
regulation of cytoskeleton organization	GO:0051493	3.07351e-19	1.02457e-16	--	911	TRINITY_DN69940_c2_g2|TRINITY_DN69940_c2_g1|TRINITY_DN53530_c0_g1|TRINITY_DN57035_c0_g1|TRINITY_DN44250_c0_g2|TRINITY_DN82195_c4_g1|TRINITY_DN82195_c4_g3|TRINITY_DN38342_c0_g1|TRINITY_DN71115_c2_g1|TRINITY_DN77980_c1_g8|TRINITY_DN23545_c0_g1|TRINITY_DN74483_c2_g1|TRINITY_DN62950_c0_g1|TRINITY_DN76232_c1_g1|TRINITY_DN63489_c0_g1|TRINITY_DN80752_c1_g5|TRINITY_DN60607_c0_g4|TRINITY_DN95623_c0_g1|TRI…	389	TRINITY_DN73441_c3_g2|TRINITY_DN90107_c0_g1|TRINITY_DN73441_c3_g5|TRINITY_DN73441_c3_g7|TRINITY_DN72937_c1_g6|TRINITY_DN72937_c1_g4|TRINITY_DN34254_c0_g1|TRINITY_DN64830_c0_g2|TRINITY_DN80961_c3_g3|TRINITY_DN60816_c0_g1|TRINITY_DN72027_c9_g2|TRINITY_DN67951_c0_g2|TRINITY_DN62633_c0_g1|TRINITY_DN77122_c0_g1|TRINITY_DN69940_c2_g1|TRINITY_DN69940_c2_g2|TRINITY_DN52880_c0_g1|TRINITY_DN56125_c0_g3|TRI…	120	TRINITY_DN61783_c0_g3|TRINITY_DN60607_c0_g4|TRINITY_DN61783_c0_g1|TRINITY_DN60607_c0_g1|TRINITY_DN74483_c3_g2|TRINITY_DN74483_c3_g1|TRINITY_DN60607_c0_g2|TRINITY_DN93968_c0_g1|TRINITY_DN56764_c0_g1|TRINITY_DN56764_c0_g2|TRINITY_DN84568_c0_g1|TRINITY_DN72937_c1_g2|TRINITY_DN48262_c0_g1|TRINITY_DN80765_c2_g4|TRINITY_DN36985_c0_g1|TRINITY_DN31491_c0_g1|TRINITY_DN31491_c0_g2|TRINITY_DN45443_c0_g1|TRI…	269	yes
cellular polysaccharide catabolic process	GO:0044247	4.30311e-19	1.38964e-16	--	890	TRINITY_DN71597_c0_g1|TRINITY_DN69815_c0_g2|TRINITY_DN69815_c0_g1|TRINITY_DN91085_c0_g1|TRINITY_DN88500_c0_g1|TRINITY_DN64048_c0_g1|TRINITY_DN42552_c0_g1|TRINITY_DN29331_c0_g2|TRINITY_DN29331_c0_g1|TRINITY_DN104285_c0_g1|TRINITY_DN99728_c0_g1|TRINITY_DN51537_c0_g1|TRINITY_DN23717_c0_g1|TRINITY_DN18846_c0_g1|TRINITY_DN41680_c0_g1|TRINITY_DN75998_c0_g4|TRINITY_DN41680_c0_g2|TRINITY_DN57767_c0_g2|TR…	381	TRINITY_DN36713_c0_g1|TRINITY_DN68386_c0_g1|TRINITY_DN18248_c0_g1|TRINITY_DN72751_c0_g1|TRINITY_DN71233_c0_g2|TRINITY_DN89752_c0_g1|TRINITY_DN71233_c0_g1|TRINITY_DN24971_c0_g1|TRINITY_DN77031_c0_g1|TRINITY_DN77031_c0_g2|TRINITY_DN73551_c3_g1|TRINITY_DN85008_c2_g1|TRINITY_DN21098_c0_g1|TRINITY_DN94054_c0_g1|TRINITY_DN24753_c0_g1|TRINITY_DN71212_c0_g3|TRINITY_DN79008_c0_g3|TRINITY_DN34275_c0_g1|TRI…	164	TRINITY_DN91746_c0_g1|TRINITY_DN34655_c0_g4|TRINITY_DN38415_c0_g1|TRINITY_DN91566_c0_g1|TRINITY_DN32093_c0_g1|TRINITY_DN100414_c0_g1|TRINITY_DN67217_c1_g1|TRINITY_DN67217_c1_g2|TRINITY_DN89346_c0_g1|TRINITY_DN67802_c1_g1|TRINITY_DN73136_c0_g1|TRINITY_DN68793_c1_g1|TRINITY_DN100283_c0_g1|TRINITY_DN77031_c0_g3|TRINITY_DN77031_c0_g4|TRINITY_DN94431_c0_g1|TRINITY_DN49249_c0_g1|TRINITY_DN36113_c0_g2|T…	217	yes
phagocytosis	GO:0006909	8.70287e-19	2.72532e-16	--	257	TRINITY_DN60942_c0_g1|TRINITY_DN75082_c1_g6|TRINITY_DN69940_c2_g2|TRINITY_DN44965_c0_g1|TRINITY_DN38128_c0_g1|TRINITY_DN54763_c0_g1|TRINITY_DN93827_c0_g1|TRINITY_DN58127_c0_g1|TRINITY_DN25345_c0_g1|TRINITY_DN75839_c1_g2|TRINITY_DN94002_c0_g1|TRINITY_DN80881_c2_g3|TRINITY_DN80881_c2_g2|TRINITY_DN82962_c0_g1|TRINITY_DN103816_c0_g1|TRINITY_DN80881_c2_g9|TRINITY_DN69940_c2_g1|TRINITY_DN92047_c0_g1|TR…	142	TRINITY_DN74909_c0_g1|TRINITY_DN22969_c0_g1|TRINITY_DN63768_c1_g1|TRINITY_DN68926_c0_g7|TRINITY_DN65740_c0_g1|TRINITY_DN36207_c0_g1|TRINITY_DN61994_c1_g1|TRINITY_DN76380_c1_g1|TRINITY_DN101763_c0_g1|TRINITY_DN83565_c2_g3|TRINITY_DN71713_c0_g1|TRINITY_DN65740_c2_g1|TRINITY_DN94002_c0_g1|TRINITY_DN96998_c0_g1|TRINITY_DN100422_c0_g1|TRINITY_DN69940_c2_g1|TRINITY_DN69940_c2_g2|TRINITY_DN72791_c0_g1|T…	20	TRINITY_DN61783_c0_g3|TRINITY_DN75082_c1_g6|TRINITY_DN61783_c0_g1|TRINITY_DN99481_c0_g1|TRINITY_DN23737_c0_g1|TRINITY_DN56764_c0_g1|TRINITY_DN56764_c0_g2|TRINITY_DN9134_c0_g1|TRINITY_DN76040_c1_g2|TRINITY_DN76040_c1_g3|TRINITY_DN82962_c0_g1|TRINITY_DN42885_c0_g1|TRINITY_DN46511_c0_g2|TRINITY_DN31491_c0_g2|TRINITY_DN34485_c0_g2|TRINITY_DN91823_c0_g1|TRINITY_DN72027_c6_g1|TRINITY_DN72027_c6_g3|TRIN…	122	yes
mitotic cytokinesis	GO:0000281	9.42243e-19	2.86386e-16	--	346	TRINITY_DN60942_c0_g1|TRINITY_DN69940_c2_g2|TRINITY_DN69940_c2_g1|TRINITY_DN70795_c2_g1|TRINITY_DN45443_c0_g1|TRINITY_DN54914_c0_g3|TRINITY_DN80140_c2_g4|TRINITY_DN104953_c0_g1|TRINITY_DN48875_c0_g1|TRINITY_DN103816_c0_g1|TRINITY_DN38464_c0_g1|TRINITY_DN70725_c0_g4|TRINITY_DN73128_c1_g2|TRINITY_DN70725_c0_g1|TRINITY_DN67619_c0_g2|TRINITY_DN87033_c0_g3|TRINITY_DN62500_c3_g2|TRINITY_DN21261_c0_g1|T…	178	TRINITY_DN72021_c2_g3|TRINITY_DN73441_c3_g7|TRINITY_DN62635_c0_g2|TRINITY_DN70725_c0_g1|TRINITY_DN43853_c0_g1|TRINITY_DN72406_c2_g2|TRINITY_DN65740_c0_g1|TRINITY_DN80140_c2_g4|TRINITY_DN65740_c2_g1|TRINITY_DN69940_c2_g1|TRINITY_DN69940_c2_g2|TRINITY_DN52880_c0_g1|TRINITY_DN81089_c0_g1|TRINITY_DN73128_c1_g2|TRINITY_DN72054_c4_g7|TRINITY_DN72614_c0_g8|TRINITY_DN71572_c1_g4|TRINITY_DN62233_c0_g2|TRI…	30	TRINITY_DN60607_c0_g1|TRINITY_DN76193_c3_g1|TRINITY_DN60607_c0_g2|TRINITY_DN56764_c0_g1|TRINITY_DN56764_c0_g2|TRINITY_DN62950_c0_g1|TRINITY_DN36985_c0_g1|TRINITY_DN20587_c0_g1|TRINITY_DN46511_c0_g2|TRINITY_DN45443_c0_g1|TRINITY_DN66224_c0_g2|TRINITY_DN80140_c1_g3|TRINITY_DN70795_c2_g1|TRINITY_DN81831_c0_g1|TRINITY_DN81831_c0_g2|TRINITY_DN17964_c0_g1|TRINITY_DN103492_c0_g1|TRINITY_DN60942_c0_g1|TR…	148	yes
regulation of cellular component size	GO:0032535	6.0991e-18	1.8008e-15	--	826	TRINITY_DN66679_c1_g1|TRINITY_DN69940_c2_g1|TRINITY_DN53530_c0_g1|TRINITY_DN57035_c0_g1|TRINITY_DN82195_c4_g1|TRINITY_DN82195_c4_g3|TRINITY_DN38342_c0_g1|TRINITY_DN80961_c2_g8|TRINITY_DN80121_c4_g1|TRINITY_DN31689_c0_g1|TRINITY_DN74483_c2_g1|TRINITY_DN62950_c0_g1|TRINITY_DN76232_c1_g1|TRINITY_DN88430_c0_g1|TRINITY_DN60607_c0_g4|TRINITY_DN95623_c0_g1|TRINITY_DN17003_c0_g1|TRINITY_DN82409_c1_g4|TRI…	354	TRINITY_DN73441_c3_g2|TRINITY_DN90107_c0_g1|TRINITY_DN73441_c3_g5|TRINITY_DN73441_c3_g7|TRINITY_DN79815_c1_g2|TRINITY_DN72937_c1_g4|TRINITY_DN34254_c0_g1|TRINITY_DN79815_c1_g5|TRINITY_DN77066_c1_g5|TRINITY_DN64830_c0_g2|TRINITY_DN71339_c0_g2|TRINITY_DN60816_c0_g1|TRINITY_DN72027_c9_g2|TRINITY_DN62633_c0_g1|TRINITY_DN69940_c2_g1|TRINITY_DN69940_c2_g2|TRINITY_DN52880_c0_g1|TRINITY_DN56125_c0_g3|TRI…	111	TRINITY_DN61783_c0_g3|TRINITY_DN60607_c0_g4|TRINITY_DN61783_c0_g1|TRINITY_DN79815_c1_g8|TRINITY_DN99764_c0_g1|TRINITY_DN91985_c0_g1|TRINITY_DN74483_c3_g1|TRINITY_DN85803_c0_g5|TRINITY_DN93968_c0_g1|TRINITY_DN56764_c0_g1|TRINITY_DN56764_c0_g2|TRINITY_DN72937_c1_g2|TRINITY_DN62950_c0_g1|TRINITY_DN80765_c2_g4|TRINITY_DN36985_c0_g1|TRINITY_DN83485_c0_g5|TRINITY_DN31491_c0_g1|TRINITY_DN31491_c0_g2|TRI…	243	yes
chemotaxis	GO:0006935	2.13747e-17	6.13572e-15	--	334	TRINITY_DN60942_c0_g1|TRINITY_DN71699_c3_g3|TRINITY_DN71699_c3_g2|TRINITY_DN35720_c0_g1|TRINITY_DN18343_c0_g1|TRINITY_DN93827_c0_g1|TRINITY_DN54914_c0_g3|TRINITY_DN47536_c0_g2|TRINITY_DN19864_c0_g2|TRINITY_DN102451_c0_g1|TRINITY_DN65174_c0_g2|TRINITY_DN37452_c0_g1|TRINITY_DN71699_c1_g1|TRINITY_DN82195_c4_g6|TRINITY_DN73128_c1_g2|TRINITY_DN82195_c4_g3|TRINITY_DN67619_c0_g2|TRINITY_DN37088_c0_g1|TR…	170	TRINITY_DN65174_c0_g2|TRINITY_DN67953_c0_g1|TRINITY_DN39913_c0_g2|TRINITY_DN71120_c0_g1|TRINITY_DN35720_c0_g1|TRINITY_DN72027_c9_g2|TRINITY_DN56726_c1_g2|TRINITY_DN72380_c5_g2|TRINITY_DN73128_c1_g2|TRINITY_DN72054_c4_g7|TRINITY_DN69535_c1_g6|TRINITY_DN67585_c0_g1|TRINITY_DN102451_c0_g1|TRINITY_DN77834_c5_g3|TRINITY_DN71699_c1_g1|TRINITY_DN53080_c0_g1|TRINITY_DN47536_c0_g2|TRINITY_DN74816_c0_g4|TR…	22	TRINITY_DN61783_c0_g3|TRINITY_DN60607_c0_g4|TRINITY_DN80183_c0_g2|TRINITY_DN56233_c0_g1|TRINITY_DN60607_c0_g2|TRINITY_DN61783_c0_g1|TRINITY_DN59951_c0_g1|TRINITY_DN76040_c1_g3|TRINITY_DN20587_c0_g1|TRINITY_DN60607_c0_g1|TRINITY_DN3374_c0_g1|TRINITY_DN81831_c0_g1|TRINITY_DN81831_c0_g2|TRINITY_DN73069_c0_g1|TRINITY_DN46382_c0_g2|TRINITY_DN89636_c0_g1|TRINITY_DN70748_c4_g1|TRINITY_DN37088_c0_g1|TRIN…	148	yes
carbohydrate catabolic process	GO:0016052	3.21297e-17	8.9093e-15	GO:0006095|GO:0044724	3056	TRINITY_DN87343_c1_g1|TRINITY_DN74768_c0_g3|TRINITY_DN71597_c0_g1|TRINITY_DN81347_c1_g4|TRINITY_DN58460_c0_g1|TRINITY_DN52971_c0_g1|TRINITY_DN61666_c0_g1|TRINITY_DN33655_c0_g1|TRINITY_DN71711_c0_g1|TRINITY_DN69815_c0_g2|TRINITY_DN69815_c0_g1|TRINITY_DN70354_c1_g1|TRINITY_DN91085_c0_g1|TRINITY_DN35205_c0_g3|TRINITY_DN88500_c0_g1|TRINITY_DN97586_c0_g1|TRINITY_DN55123_c0_g1|TRINITY_DN69500_c0_g1|TRI…	1093	TRINITY_DN78029_c1_g1|TRINITY_DN68386_c0_g1|TRINITY_DN64147_c0_g1|TRINITY_DN18248_c0_g1|TRINITY_DN71233_c0_g2|TRINITY_DN71233_c0_g1|TRINITY_DN8651_c0_g1|TRINITY_DN75652_c3_g1|TRINITY_DN77031_c0_g2|TRINITY_DN21098_c0_g1|TRINITY_DN85022_c1_g2|TRINITY_DN64147_c0_g2|TRINITY_DN76553_c0_g1|TRINITY_DN78250_c1_g1|TRINITY_DN77633_c2_g1|TRINITY_DN100384_c0_g1|TRINITY_DN67357_c0_g1|TRINITY_DN76690_c5_g1|TRI…	481	TRINITY_DN28611_c0_g1|TRINITY_DN78605_c1_g5|TRINITY_DN78605_c1_g6|TRINITY_DN15161_c0_g2|TRINITY_DN35069_c0_g2|TRINITY_DN77031_c0_g4|TRINITY_DN36113_c0_g2|TRINITY_DN36113_c0_g3|TRINITY_DN25817_c0_g1|TRINITY_DN78005_c3_g2|TRINITY_DN60953_c0_g1|TRINITY_DN98274_c0_g1|TRINITY_DN75621_c3_g7|TRINITY_DN81762_c2_g11|TRINITY_DN40607_c0_g2|TRINITY_DN100177_c0_g1|TRINITY_DN94676_c0_g1|TRINITY_DN73183_c0_g2|T…	612	yes
lipoprotein metabolic process	GO:0042157	3.27611e-17	8.9093e-15	--	325	TRINITY_DN87735_c0_g1|TRINITY_DN90156_c0_g1|TRINITY_DN31684_c0_g1|TRINITY_DN80885_c1_g1|TRINITY_DN62343_c0_g1|TRINITY_DN49448_c0_g1|TRINITY_DN76506_c3_g2|TRINITY_DN81969_c0_g6|TRINITY_DN63283_c0_g2|TRINITY_DN63283_c0_g3|TRINITY_DN76165_c0_g4|TRINITY_DN76165_c0_g3|TRINITY_DN76165_c0_g2|TRINITY_DN76165_c0_g1|TRINITY_DN52565_c0_g1|TRINITY_DN58985_c0_g1|TRINITY_DN84770_c0_g3|TRINITY_DN88211_c0_g1|TRI…	166	TRINITY_DN76489_c4_g2|TRINITY_DN29288_c0_g2|TRINITY_DN70639_c0_g3|TRINITY_DN84186_c4_g2|TRINITY_DN54266_c0_g1|TRINITY_DN67355_c0_g1|TRINITY_DN67700_c0_g1|TRINITY_DN89398_c0_g1|TRINITY_DN96695_c0_g1|TRINITY_DN73146_c0_g3|TRINITY_DN73146_c0_g2|TRINITY_DN54122_c0_g1|TRINITY_DN68582_c0_g1|TRINITY_DN76332_c1_g5|TRINITY_DN90156_c0_g1|TRINITY_DN87222_c0_g1|TRINITY_DN76165_c0_g4|TRINITY_DN76165_c0_g1|TRI…	52	TRINITY_DN88211_c0_g1|TRINITY_DN68227_c0_g1|TRINITY_DN83509_c2_g3|TRINITY_DN95019_c0_g1|TRINITY_DN87735_c0_g1|TRINITY_DN98366_c0_g1|TRINITY_DN49448_c0_g1|TRINITY_DN73146_c0_g6|TRINITY_DN51623_c0_g2|TRINITY_DN84770_c0_g3|TRINITY_DN76165_c0_g3|TRINITY_DN76165_c0_g2|TRINITY_DN62343_c0_g1|TRINITY_DN76489_c4_g3|TRINITY_DN16203_c0_g1|TRINITY_DN19758_c0_g1|TRINITY_DN2250_c0_g1|TRINITY_DN89027_c0_g1|TRIN…	114	yes
beta-glucan metabolic process	GO:0051273	6.67782e-17	1.76945e-14	--	1020	TRINITY_DN71597_c0_g1|TRINITY_DN69815_c0_g2|TRINITY_DN69815_c0_g1|TRINITY_DN91085_c0_g1|TRINITY_DN88500_c0_g1|TRINITY_DN64048_c0_g1|TRINITY_DN42552_c0_g1|TRINITY_DN29331_c0_g2|TRINITY_DN29331_c0_g1|TRINITY_DN104285_c0_g1|TRINITY_DN99728_c0_g1|TRINITY_DN23717_c0_g1|TRINITY_DN18846_c0_g1|TRINITY_DN72931_c0_g1|TRINITY_DN41680_c0_g1|TRINITY_DN75998_c0_g4|TRINITY_DN41680_c0_g2|TRINITY_DN57767_c0_g2|TR…	418	TRINITY_DN80021_c1_g5|TRINITY_DN18248_c0_g1|TRINITY_DN72751_c0_g1|TRINITY_DN71233_c0_g2|TRINITY_DN71364_c1_g1|TRINITY_DN89752_c0_g1|TRINITY_DN71233_c0_g1|TRINITY_DN24971_c0_g1|TRINITY_DN77031_c0_g1|TRINITY_DN77031_c0_g2|TRINITY_DN73551_c3_g1|TRINITY_DN85008_c2_g1|TRINITY_DN21098_c0_g1|TRINITY_DN94054_c0_g1|TRINITY_DN24753_c0_g1|TRINITY_DN71212_c0_g3|TRINITY_DN79008_c0_g3|TRINITY_DN34275_c0_g1|TRI…	181	TRINITY_DN31086_c0_g1|TRINITY_DN31086_c0_g2|TRINITY_DN91746_c0_g1|TRINITY_DN34655_c0_g4|TRINITY_DN38415_c0_g1|TRINITY_DN73136_c0_g1|TRINITY_DN91566_c0_g1|TRINITY_DN32093_c0_g1|TRINITY_DN100414_c0_g1|TRINITY_DN67217_c1_g1|TRINITY_DN67217_c1_g2|TRINITY_DN89346_c0_g1|TRINITY_DN67802_c1_g1|TRINITY_DN103225_c0_g1|TRINITY_DN75734_c1_g1|TRINITY_DN100283_c0_g1|TRINITY_DN77031_c0_g3|TRINITY_DN77031_c0_g4|…	237	yes
actin cytoskeleton organization	GO:0030036	7.58298e-17	1.95251e-14	--	923	TRINITY_DN28213_c0_g1|TRINITY_DN67781_c0_g1|TRINITY_DN56082_c0_g1|TRINITY_DN43287_c0_g1|TRINITY_DN71652_c1_g1|TRINITY_DN71652_c1_g2|TRINITY_DN42445_c0_g2|TRINITY_DN82195_c4_g1|TRINITY_DN82195_c4_g3|TRINITY_DN62500_c3_g2|TRINITY_DN76723_c0_g2|TRINITY_DN77389_c3_g1|TRINITY_DN75248_c3_g3|TRINITY_DN38488_c0_g2|TRINITY_DN76232_c1_g1|TRINITY_DN75248_c3_g4|TRINITY_DN33163_c0_g1|TRINITY_DN12946_c0_g1|TRI…	384	TRINITY_DN90107_c0_g1|TRINITY_DN73441_c3_g5|TRINITY_DN71948_c0_g1|TRINITY_DN60895_c0_g3|TRINITY_DN77834_c4_g2|TRINITY_DN64830_c0_g2|TRINITY_DN70253_c4_g7|TRINITY_DN87739_c0_g1|TRINITY_DN76820_c1_g2|TRINITY_DN72027_c9_g2|TRINITY_DN50341_c0_g1|TRINITY_DN65798_c0_g1|TRINITY_DN74139_c0_g1|TRINITY_DN62247_c0_g1|TRINITY_DN52880_c0_g1|TRINITY_DN66330_c0_g6|TRINITY_DN67781_c0_g1|TRINITY_DN73085_c0_g1|TRI…	117	TRINITY_DN80183_c0_g2|TRINITY_DN1764_c0_g2|TRINITY_DN60607_c0_g1|TRINITY_DN103492_c0_g1|TRINITY_DN31445_c0_g1|TRINITY_DN84568_c0_g1|TRINITY_DN36985_c0_g1|TRINITY_DN12946_c0_g1|TRINITY_DN42885_c0_g1|TRINITY_DN31491_c0_g2|TRINITY_DN22201_c0_g2|TRINITY_DN75312_c2_g2|TRINITY_DN68277_c0_g1|TRINITY_DN91823_c0_g1|TRINITY_DN51623_c0_g2|TRINITY_DN72027_c6_g3|TRINITY_DN56404_c0_g1|TRINITY_DN81831_c0_g1|TRI…	267	yes
locomotion	GO:0040011	7.74657e-17	1.95251e-14	--	886	TRINITY_DN69940_c2_g2|TRINITY_DN69940_c2_g1|TRINITY_DN47546_c0_g4|TRINITY_DN36124_c0_g1|TRINITY_DN69500_c0_g1|TRINITY_DN37452_c0_g1|TRINITY_DN82195_c4_g6|TRINITY_DN82195_c4_g1|TRINITY_DN82195_c4_g3|TRINITY_DN100320_c0_g1|TRINITY_DN37088_c0_g1|TRINITY_DN62500_c3_g1|TRINITY_DN62500_c3_g2|TRINITY_DN76723_c0_g2|TRINITY_DN59108_c0_g3|TRINITY_DN72886_c5_g1|TRINITY_DN62964_c0_g1|TRINITY_DN62950_c0_g1|TR…	371	TRINITY_DN55045_c1_g1|TRINITY_DN36124_c0_g1|TRINITY_DN35720_c0_g1|TRINITY_DN76598_c1_g2|TRINITY_DN33078_c0_g1|TRINITY_DN34254_c0_g1|TRINITY_DN71699_c3_g2|TRINITY_DN69535_c1_g6|TRINITY_DN65174_c0_g2|TRINITY_DN83449_c0_g8|TRINITY_DN100422_c0_g1|TRINITY_DN83498_c1_g3|TRINITY_DN65740_c2_g1|TRINITY_DN67953_c0_g1|TRINITY_DN39913_c0_g2|TRINITY_DN72027_c7_g1|TRINITY_DN71120_c0_g1|TRINITY_DN50403_c0_g1|TR…	72	TRINITY_DN61783_c0_g3|TRINITY_DN60607_c0_g4|TRINITY_DN80183_c0_g2|TRINITY_DN60653_c0_g1|TRINITY_DN56233_c0_g1|TRINITY_DN44019_c0_g1|TRINITY_DN60607_c0_g2|TRINITY_DN76134_c0_g3|TRINITY_DN56764_c0_g1|TRINITY_DN56764_c0_g2|TRINITY_DN84568_c0_g1|TRINITY_DN61783_c0_g1|TRINITY_DN76040_c1_g2|TRINITY_DN76040_c1_g3|TRINITY_DN56819_c1_g1|TRINITY_DN51709_c0_g2|TRINITY_DN20587_c0_g1|TRINITY_DN42885_c0_g1|TRI…	299	yes
cytoskeleton-dependent cytokinesis	GO:0061640	9.79003e-17	2.40881e-14	--	369	TRINITY_DN60942_c0_g1|TRINITY_DN69940_c2_g2|TRINITY_DN69940_c2_g1|TRINITY_DN70795_c2_g1|TRINITY_DN45443_c0_g1|TRINITY_DN54914_c0_g3|TRINITY_DN80140_c2_g4|TRINITY_DN104953_c0_g1|TRINITY_DN103816_c0_g1|TRINITY_DN94530_c0_g1|TRINITY_DN38464_c0_g1|TRINITY_DN70725_c0_g4|TRINITY_DN73128_c1_g2|TRINITY_DN70725_c0_g1|TRINITY_DN94825_c0_g1|TRINITY_DN67619_c0_g2|TRINITY_DN87033_c0_g3|TRINITY_DN70814_c0_g1|T…	182	TRINITY_DN72021_c2_g3|TRINITY_DN73441_c3_g7|TRINITY_DN62635_c0_g2|TRINITY_DN70725_c0_g1|TRINITY_DN43853_c0_g1|TRINITY_DN72406_c2_g2|TRINITY_DN65740_c0_g1|TRINITY_DN80140_c2_g4|TRINITY_DN65740_c2_g1|TRINITY_DN69940_c2_g1|TRINITY_DN69940_c2_g2|TRINITY_DN52880_c0_g1|TRINITY_DN81089_c0_g1|TRINITY_DN73128_c1_g2|TRINITY_DN72054_c4_g7|TRINITY_DN72614_c0_g8|TRINITY_DN71572_c1_g4|TRINITY_DN62233_c0_g2|TRI…	32	TRINITY_DN60607_c0_g1|TRINITY_DN76193_c3_g1|TRINITY_DN60607_c0_g2|TRINITY_DN56764_c0_g1|TRINITY_DN56764_c0_g2|TRINITY_DN75635_c0_g1|TRINITY_DN36985_c0_g1|TRINITY_DN20587_c0_g1|TRINITY_DN46511_c0_g2|TRINITY_DN45443_c0_g1|TRINITY_DN66224_c0_g2|TRINITY_DN75279_c4_g3|TRINITY_DN70795_c2_g1|TRINITY_DN81831_c0_g1|TRINITY_DN81831_c0_g2|TRINITY_DN17964_c0_g1|TRINITY_DN103492_c0_g1|TRINITY_DN60942_c0_g1|TR…	150	yes
regulation of anatomical structure size	GO:0090066	1.06459e-16	2.55848e-14	--	879	TRINITY_DN66679_c1_g1|TRINITY_DN69940_c2_g1|TRINITY_DN53530_c0_g1|TRINITY_DN57035_c0_g1|TRINITY_DN21100_c0_g1|TRINITY_DN82195_c4_g1|TRINITY_DN82195_c4_g3|TRINITY_DN38342_c0_g1|TRINITY_DN80961_c2_g8|TRINITY_DN80121_c4_g1|TRINITY_DN31689_c0_g1|TRINITY_DN74483_c2_g1|TRINITY_DN62950_c0_g1|TRINITY_DN76232_c1_g1|TRINITY_DN88430_c0_g1|TRINITY_DN60607_c0_g4|TRINITY_DN95623_c0_g1|TRINITY_DN17003_c0_g1|TRI…	368	TRINITY_DN73441_c3_g2|TRINITY_DN90107_c0_g1|TRINITY_DN73441_c3_g5|TRINITY_DN73441_c3_g7|TRINITY_DN79815_c1_g2|TRINITY_DN72937_c1_g4|TRINITY_DN34254_c0_g1|TRINITY_DN79815_c1_g5|TRINITY_DN77066_c1_g5|TRINITY_DN64830_c0_g2|TRINITY_DN45227_c0_g1|TRINITY_DN60816_c0_g1|TRINITY_DN72027_c9_g2|TRINITY_DN62633_c0_g1|TRINITY_DN69940_c2_g1|TRINITY_DN69940_c2_g2|TRINITY_DN52880_c0_g1|TRINITY_DN56125_c0_g3|TRI…	115	TRINITY_DN61783_c0_g3|TRINITY_DN60607_c0_g4|TRINITY_DN61783_c0_g1|TRINITY_DN79815_c1_g8|TRINITY_DN99764_c0_g1|TRINITY_DN91985_c0_g1|TRINITY_DN74483_c3_g1|TRINITY_DN85803_c0_g5|TRINITY_DN93968_c0_g1|TRINITY_DN56764_c0_g1|TRINITY_DN56764_c0_g2|TRINITY_DN64880_c0_g2|TRINITY_DN62950_c0_g1|TRINITY_DN80765_c2_g4|TRINITY_DN36985_c0_g1|TRINITY_DN83485_c0_g5|TRINITY_DN31491_c0_g1|TRINITY_DN31491_c0_g2|TRI…	253	yes
cytokinesis	GO:0000910	3.31646e-16	7.78916e-14	GO:0007104|GO:0016288|GO:0033205	404	TRINITY_DN60942_c0_g1|TRINITY_DN69940_c2_g2|TRINITY_DN69940_c2_g1|TRINITY_DN75988_c1_g5|TRINITY_DN70795_c2_g1|TRINITY_DN65740_c2_g1|TRINITY_DN54914_c0_g3|TRINITY_DN80140_c2_g4|TRINITY_DN104953_c0_g1|TRINITY_DN103816_c0_g1|TRINITY_DN79261_c0_g1|TRINITY_DN94530_c0_g1|TRINITY_DN38464_c0_g1|TRINITY_DN38464_c0_g2|TRINITY_DN73128_c1_g2|TRINITY_DN70725_c0_g1|TRINITY_DN94825_c0_g1|TRINITY_DN75279_c4_g3|T…	194	TRINITY_DN55584_c0_g1|TRINITY_DN72021_c2_g3|TRINITY_DN73441_c3_g7|TRINITY_DN62635_c0_g2|TRINITY_DN70725_c0_g1|TRINITY_DN43853_c0_g1|TRINITY_DN72406_c2_g2|TRINITY_DN65740_c0_g1|TRINITY_DN80140_c2_g4|TRINITY_DN65740_c2_g1|TRINITY_DN69940_c2_g1|TRINITY_DN69940_c2_g2|TRINITY_DN52880_c0_g1|TRINITY_DN81089_c0_g1|TRINITY_DN73128_c1_g2|TRINITY_DN72054_c4_g7|TRINITY_DN85863_c4_g1|TRINITY_DN72614_c0_g8|TRI…	38	TRINITY_DN60607_c0_g1|TRINITY_DN76193_c3_g1|TRINITY_DN60607_c0_g2|TRINITY_DN56764_c0_g1|TRINITY_DN56764_c0_g2|TRINITY_DN62950_c0_g1|TRINITY_DN36985_c0_g1|TRINITY_DN12946_c0_g1|TRINITY_DN46511_c0_g2|TRINITY_DN45443_c0_g1|TRINITY_DN66224_c0_g2|TRINITY_DN80140_c1_g3|TRINITY_DN70795_c2_g1|TRINITY_DN81831_c0_g1|TRINITY_DN81831_c0_g2|TRINITY_DN17964_c0_g1|TRINITY_DN103492_c0_g1|TRINITY_DN60942_c0_g1|TR…	156	yes
cellular carbohydrate catabolic process	GO:0044275	3.59664e-16	8.25947e-14	--	1125	TRINITY_DN71597_c0_g1|TRINITY_DN81347_c1_g4|TRINITY_DN69815_c0_g2|TRINITY_DN69815_c0_g1|TRINITY_DN91085_c0_g1|TRINITY_DN88500_c0_g1|TRINITY_DN64048_c0_g1|TRINITY_DN42552_c0_g1|TRINITY_DN29331_c0_g2|TRINITY_DN29331_c0_g1|TRINITY_DN104285_c0_g1|TRINITY_DN99728_c0_g1|TRINITY_DN79605_c2_g2|TRINITY_DN79605_c2_g5|TRINITY_DN79605_c2_g4|TRINITY_DN51537_c0_g1|TRINITY_DN23717_c0_g1|TRINITY_DN18846_c0_g1|TR…	451	TRINITY_DN36713_c0_g1|TRINITY_DN60713_c0_g1|TRINITY_DN68386_c0_g1|TRINITY_DN18248_c0_g1|TRINITY_DN72751_c0_g1|TRINITY_DN71233_c0_g2|TRINITY_DN89752_c0_g1|TRINITY_DN71233_c0_g1|TRINITY_DN24971_c0_g1|TRINITY_DN77031_c0_g1|TRINITY_DN77031_c0_g2|TRINITY_DN73551_c3_g1|TRINITY_DN85008_c2_g1|TRINITY_DN21098_c0_g1|TRINITY_DN65561_c0_g1|TRINITY_DN94054_c0_g1|TRINITY_DN24753_c0_g1|TRINITY_DN93901_c0_g1|TRI…	196	TRINITY_DN91746_c0_g1|TRINITY_DN34655_c0_g4|TRINITY_DN38415_c0_g1|TRINITY_DN73136_c0_g1|TRINITY_DN91566_c0_g1|TRINITY_DN32093_c0_g1|TRINITY_DN100414_c0_g1|TRINITY_DN67217_c1_g1|TRINITY_DN67217_c1_g2|TRINITY_DN89346_c0_g1|TRINITY_DN67802_c1_g1|TRINITY_DN103225_c0_g1|TRINITY_DN68793_c1_g1|TRINITY_DN100283_c0_g1|TRINITY_DN77031_c0_g3|TRINITY_DN77031_c0_g4|TRINITY_DN94431_c0_g1|TRINITY_DN49249_c0_g1|…	255	yes
sorocarp development	GO:0030587	4.41619e-16	9.70997e-14	--	203	TRINITY_DN37743_c0_g1|TRINITY_DN38128_c0_g1|TRINITY_DN95373_c0_g1|TRINITY_DN48352_c0_g1|TRINITY_DN47536_c0_g2|TRINITY_DN19864_c0_g2|TRINITY_DN73472_c3_g2|TRINITY_DN13626_c0_g1|TRINITY_DN71414_c2_g9|TRINITY_DN18453_c0_g1|TRINITY_DN82358_c0_g2|TRINITY_DN90988_c0_g1|TRINITY_DN62500_c3_g1|TRINITY_DN76723_c0_g2|TRINITY_DN89636_c0_g1|TRINITY_DN79199_c1_g5|TRINITY_DN105364_c0_g1|TRINITY_DN58127_c0_g1|TR…	114	TRINITY_DN75417_c2_g1|TRINITY_DN47536_c0_g2|TRINITY_DN75417_c2_g4|TRINITY_DN14606_c0_g1|TRINITY_DN73441_c3_g7|TRINITY_DN36207_c0_g1|TRINITY_DN61994_c1_g1|TRINITY_DN43554_c1_g1|TRINITY_DN75857_c0_g1|TRINITY_DN79199_c1_g5|TRINITY_DN75857_c0_g3|TRINITY_DN79659_c4_g1|TRINITY_DN73883_c2_g8|TRINITY_DN72054_c4_g7	14	TRINITY_DN60607_c0_g1|TRINITY_DN60607_c0_g2|TRINITY_DN24823_c0_g1|TRINITY_DN31445_c0_g1|TRINITY_DN42885_c0_g1|TRINITY_DN46511_c0_g2|TRINITY_DN91823_c0_g1|TRINITY_DN56404_c0_g1|TRINITY_DN3374_c0_g1|TRINITY_DN82358_c0_g2|TRINITY_DN89636_c0_g1|TRINITY_DN75857_c0_g4|TRINITY_DN73472_c3_g2|TRINITY_DN99759_c0_g1|TRINITY_DN95373_c0_g1|TRINITY_DN72380_c2_g1|TRINITY_DN35321_c0_g1|TRINITY_DN95652_c0_g1|TRIN…	100	yes
non-reproductive fruiting body development	GO:0090702	4.41619e-16	9.70997e-14	--	203	TRINITY_DN37743_c0_g1|TRINITY_DN38128_c0_g1|TRINITY_DN95373_c0_g1|TRINITY_DN48352_c0_g1|TRINITY_DN47536_c0_g2|TRINITY_DN19864_c0_g2|TRINITY_DN73472_c3_g2|TRINITY_DN13626_c0_g1|TRINITY_DN71414_c2_g9|TRINITY_DN18453_c0_g1|TRINITY_DN82358_c0_g2|TRINITY_DN90988_c0_g1|TRINITY_DN62500_c3_g1|TRINITY_DN76723_c0_g2|TRINITY_DN89636_c0_g1|TRINITY_DN79199_c1_g5|TRINITY_DN105364_c0_g1|TRINITY_DN58127_c0_g1|TR…	114	TRINITY_DN75417_c2_g1|TRINITY_DN47536_c0_g2|TRINITY_DN75417_c2_g4|TRINITY_DN14606_c0_g1|TRINITY_DN73441_c3_g7|TRINITY_DN36207_c0_g1|TRINITY_DN61994_c1_g1|TRINITY_DN43554_c1_g1|TRINITY_DN75857_c0_g1|TRINITY_DN79199_c1_g5|TRINITY_DN75857_c0_g3|TRINITY_DN79659_c4_g1|TRINITY_DN73883_c2_g8|TRINITY_DN72054_c4_g7	14	TRINITY_DN60607_c0_g1|TRINITY_DN60607_c0_g2|TRINITY_DN24823_c0_g1|TRINITY_DN31445_c0_g1|TRINITY_DN42885_c0_g1|TRINITY_DN46511_c0_g2|TRINITY_DN91823_c0_g1|TRINITY_DN56404_c0_g1|TRINITY_DN3374_c0_g1|TRINITY_DN82358_c0_g2|TRINITY_DN89636_c0_g1|TRINITY_DN75857_c0_g4|TRINITY_DN73472_c3_g2|TRINITY_DN99759_c0_g1|TRINITY_DN95373_c0_g1|TRINITY_DN72380_c2_g1|TRINITY_DN35321_c0_g1|TRINITY_DN95652_c0_g1|TRIN…	100	yes
actin filament-based process	GO:0030029	8.37939e-16	1.80401e-13	--	1022	TRINITY_DN28213_c0_g1|TRINITY_DN67781_c0_g1|TRINITY_DN56082_c0_g1|TRINITY_DN54763_c0_g1|TRINITY_DN43287_c0_g1|TRINITY_DN71652_c1_g1|TRINITY_DN71652_c1_g2|TRINITY_DN42445_c0_g2|TRINITY_DN82195_c4_g1|TRINITY_DN82195_c4_g3|TRINITY_DN101732_c0_g1|TRINITY_DN62500_c3_g2|TRINITY_DN67348_c0_g1|TRINITY_DN12946_c0_g1|TRINITY_DN77389_c3_g1|TRINITY_DN75248_c3_g3|TRINITY_DN38488_c0_g2|TRINITY_DN76232_c1_g1|TR…	414	TRINITY_DN90107_c0_g1|TRINITY_DN73441_c3_g5|TRINITY_DN71948_c0_g1|TRINITY_DN60895_c0_g3|TRINITY_DN72937_c1_g6|TRINITY_DN72937_c1_g4|TRINITY_DN77834_c4_g2|TRINITY_DN64830_c0_g2|TRINITY_DN70253_c4_g7|TRINITY_DN87739_c0_g1|TRINITY_DN76820_c1_g2|TRINITY_DN72027_c9_g2|TRINITY_DN50341_c0_g1|TRINITY_DN65798_c0_g1|TRINITY_DN74139_c0_g1|TRINITY_DN62247_c0_g1|TRINITY_DN52880_c0_g1|TRINITY_DN56125_c0_g2|TRI…	123	TRINITY_DN80183_c0_g2|TRINITY_DN60653_c0_g1|TRINITY_DN60607_c0_g1|TRINITY_DN60607_c0_g2|TRINITY_DN93968_c0_g1|TRINITY_DN31445_c0_g1|TRINITY_DN84568_c0_g1|TRINITY_DN70069_c0_g5|TRINITY_DN59070_c0_g1|TRINITY_DN36985_c0_g1|TRINITY_DN12946_c0_g1|TRINITY_DN42885_c0_g1|TRINITY_DN31491_c0_g2|TRINITY_DN22201_c0_g2|TRINITY_DN75312_c2_g2|TRINITY_DN68277_c0_g1|TRINITY_DN91823_c0_g1|TRINITY_DN51623_c0_g2|TRI…	291	yes
phototaxis	GO:0042331	1.63888e-15	3.45637e-13	GO:0046953	67	TRINITY_DN72886_c4_g1|TRINITY_DN38128_c0_g1|TRINITY_DN26128_c0_g1|TRINITY_DN70024_c0_g1|TRINITY_DN31445_c0_g1|TRINITY_DN54738_c0_g1|TRINITY_DN42783_c0_g2|TRINITY_DN91823_c0_g1|TRINITY_DN42783_c0_g1|TRINITY_DN52222_c0_g1|TRINITY_DN52222_c0_g2|TRINITY_DN103822_c0_g1|TRINITY_DN75524_c3_g1|TRINITY_DN61115_c0_g2|TRINITY_DN80184_c1_g1|TRINITY_DN80184_c0_g1|TRINITY_DN80184_c0_g3|TRINITY_DN80184_c0_g2|TR…	51	TRINITY_DN55400_c0_g1|TRINITY_DN73128_c1_g2	2	TRINITY_DN41097_c0_g2|TRINITY_DN54738_c0_g1|TRINITY_DN55349_c0_g1|TRINITY_DN31896_c0_g1|TRINITY_DN31445_c0_g1|TRINITY_DN61550_c0_g2|TRINITY_DN86055_c0_g1|TRINITY_DN42885_c0_g1|TRINITY_DN72886_c1_g2|TRINITY_DN91823_c0_g1|TRINITY_DN80184_c1_g1|TRINITY_DN75312_c2_g2|TRINITY_DN89227_c0_g1|TRINITY_DN75092_c0_g5|TRINITY_DN60653_c0_g1|TRINITY_DN75635_c0_g1|TRINITY_DN70024_c0_g1|TRINITY_DN72886_c5_g1|TRI…	49	yes
energy taxis	GO:0009453	4.70613e-15	9.72663e-13	--	68	TRINITY_DN42783_c0_g2|TRINITY_DN72886_c4_g1|TRINITY_DN80184_c0_g1|TRINITY_DN38128_c0_g1|TRINITY_DN61550_c0_g2|TRINITY_DN26128_c0_g1|TRINITY_DN70024_c0_g1|TRINITY_DN31445_c0_g1|TRINITY_DN54738_c0_g1|TRINITY_DN52222_c0_g5|TRINITY_DN91823_c0_g1|TRINITY_DN42783_c0_g1|TRINITY_DN61115_c0_g2|TRINITY_DN52222_c0_g2|TRINITY_DN103822_c0_g1|TRINITY_DN75635_c0_g1|TRINITY_DN52222_c0_g1|TRINITY_DN67353_c0_g3|TR…	51	TRINITY_DN55400_c0_g1|TRINITY_DN73128_c1_g2	2	TRINITY_DN41097_c0_g2|TRINITY_DN54738_c0_g1|TRINITY_DN55349_c0_g1|TRINITY_DN31896_c0_g1|TRINITY_DN31445_c0_g1|TRINITY_DN61550_c0_g2|TRINITY_DN86055_c0_g1|TRINITY_DN42885_c0_g1|TRINITY_DN72886_c1_g2|TRINITY_DN91823_c0_g1|TRINITY_DN80184_c1_g1|TRINITY_DN75312_c2_g2|TRINITY_DN89227_c0_g1|TRINITY_DN75092_c0_g5|TRINITY_DN60653_c0_g1|TRINITY_DN75635_c0_g1|TRINITY_DN70024_c0_g1|TRINITY_DN72886_c5_g1|TRI…	49	yes
polysaccharide metabolic process	GO:0005976	2.9351e-14	5.94731e-12	--	2710	TRINITY_DN71597_c0_g1|TRINITY_DN52971_c0_g1|TRINITY_DN74045_c2_g1|TRINITY_DN103242_c0_g1|TRINITY_DN69815_c0_g2|TRINITY_DN69815_c0_g1|TRINITY_DN91085_c0_g1|TRINITY_DN88500_c0_g1|TRINITY_DN71916_c5_g1|TRINITY_DN64048_c0_g1|TRINITY_DN72664_c1_g1|TRINITY_DN29331_c0_g2|TRINITY_DN29331_c0_g1|TRINITY_DN104285_c0_g1|TRINITY_DN80994_c2_g1|TRINITY_DN100320_c0_g1|TRINITY_DN83383_c2_g7|TRINITY_DN83383_c2_g4|…	961	TRINITY_DN78029_c1_g1|TRINITY_DN68386_c0_g1|TRINITY_DN18248_c0_g1|TRINITY_DN71233_c0_g2|TRINITY_DN71364_c1_g1|TRINITY_DN71233_c0_g1|TRINITY_DN68826_c0_g2|TRINITY_DN77031_c0_g1|TRINITY_DN77031_c0_g2|TRINITY_DN21098_c0_g1|TRINITY_DN13341_c0_g1|TRINITY_DN76736_c0_g1|TRINITY_DN100384_c0_g1|TRINITY_DN76690_c5_g1|TRINITY_DN75359_c0_g8|TRINITY_DN43431_c0_g1|TRINITY_DN75652_c1_g1|TRINITY_DN62544_c1_g4|TR…	438	TRINITY_DN75583_c1_g9|TRINITY_DN40607_c0_g2|TRINITY_DN75583_c1_g4|TRINITY_DN78605_c1_g5|TRINITY_DN83383_c2_g16|TRINITY_DN78605_c1_g6|TRINITY_DN35069_c0_g1|TRINITY_DN35069_c0_g2|TRINITY_DN33041_c0_g1|TRINITY_DN36113_c0_g2|TRINITY_DN36113_c0_g3|TRINITY_DN25817_c0_g1|TRINITY_DN82607_c6_g2|TRINITY_DN81787_c0_g3|TRINITY_DN78005_c3_g2|TRINITY_DN42834_c0_g1|TRINITY_DN98274_c0_g1|TRINITY_DN18969_c0_g1|TR…	523	yes
protein metabolic process	GO:0019538	7.62428e-14	1.51518e-11	GO:0006411	17997	TRINITY_DN61679_c0_g2|TRINITY_DN85272_c2_g2|TRINITY_DN91757_c0_g1|TRINITY_DN85020_c3_g1|TRINITY_DN15022_c0_g1|TRINITY_DN93759_c0_g1|TRINITY_DN85481_c8_g1|TRINITY_DN73388_c2_g7|TRINITY_DN71554_c3_g1|TRINITY_DN59950_c0_g2|TRINITY_DN35027_c0_g2|TRINITY_DN40933_c0_g3|TRINITY_DN40933_c0_g2|TRINITY_DN40933_c0_g1|TRINITY_DN50380_c0_g1|TRINITY_DN48309_c0_g2|TRINITY_DN85040_c1_g1|TRINITY_DN56156_c0_g1|TRI…	5604	TRINITY_DN72354_c5_g8|TRINITY_DN30419_c0_g1|TRINITY_DN53340_c0_g1|TRINITY_DN68347_c0_g1|TRINITY_DN79485_c4_g1|TRINITY_DN15752_c0_g1|TRINITY_DN72354_c5_g6|TRINITY_DN99131_c0_g1|TRINITY_DN65786_c0_g7|TRINITY_DN73790_c3_g3|TRINITY_DN67700_c0_g1|TRINITY_DN73964_c4_g1|TRINITY_DN73497_c0_g1|TRINITY_DN86331_c2_g1|TRINITY_DN71208_c0_g3|TRINITY_DN69537_c0_g1|TRINITY_DN85235_c1_g2|TRINITY_DN76165_c0_g1|TRI…	2130	TRINITY_DN80050_c0_g1|TRINITY_DN88211_c0_g1|TRINITY_DN34786_c0_g1|TRINITY_DN73497_c0_g3|TRINITY_DN78657_c1_g14|TRINITY_DN89129_c0_g1|TRINITY_DN73790_c3_g5|TRINITY_DN76655_c0_g2|TRINITY_DN49448_c0_g1|TRINITY_DN100126_c0_g1|TRINITY_DN77024_c3_g1|TRINITY_DN7610_c0_g1|TRINITY_DN47223_c0_g1|TRINITY_DN31657_c0_g1|TRINITY_DN76600_c2_g1|TRINITY_DN74442_c1_g3|TRINITY_DN81831_c0_g1|TRINITY_DN74442_c1_g6|TR…	3474	yes
cell-substrate adhesion	GO:0031589	8.19167e-14	1.59722e-11	--	178	TRINITY_DN60942_c0_g1|TRINITY_DN71699_c3_g3|TRINITY_DN64434_c0_g1|TRINITY_DN41473_c0_g2|TRINITY_DN54763_c0_g1|TRINITY_DN69072_c0_g2|TRINITY_DN80881_c2_g3|TRINITY_DN80881_c2_g2|TRINITY_DN76437_c1_g4|TRINITY_DN68691_c0_g1|TRINITY_DN80881_c2_g9|TRINITY_DN82195_c4_g1|TRINITY_DN82195_c4_g3|TRINITY_DN77371_c1_g4|TRINITY_DN60685_c0_g3|TRINITY_DN96592_c0_g1|TRINITY_DN63489_c0_g1|TRINITY_DN18560_c0_g1|TRI…	99	TRINITY_DN72021_c2_g3|TRINITY_DN58888_c0_g2|TRINITY_DN77329_c0_g1|TRINITY_DN72027_c7_g1|TRINITY_DN72027_c9_g2|TRINITY_DN34604_c0_g1|TRINITY_DN34840_c0_g1|TRINITY_DN72380_c5_g2|TRINITY_DN77411_c0_g1|TRINITY_DN77834_c5_g3|TRINITY_DN51289_c1_g1|TRINITY_DN68568_c4_g2|TRINITY_DN41473_c0_g2|TRINITY_DN68568_c4_g9|TRINITY_DN78923_c0_g1|TRINITY_DN18560_c0_g1|TRINITY_DN82320_c0_g3|TRINITY_DN82320_c0_g2|TRI…	22	TRINITY_DN80183_c0_g2|TRINITY_DN72441_c0_g2|TRINITY_DN55659_c0_g1|TRINITY_DN69072_c0_g2|TRINITY_DN72021_c2_g1|TRINITY_DN78524_c2_g1|TRINITY_DN92854_c0_g1|TRINITY_DN68691_c0_g1|TRINITY_DN51709_c0_g2|TRINITY_DN38809_c0_g2|TRINITY_DN68750_c0_g2|TRINITY_DN46511_c0_g2|TRINITY_DN75692_c1_g2|TRINITY_DN19676_c0_g1|TRINITY_DN71909_c1_g1|TRINITY_DN37028_c0_g1|TRINITY_DN52222_c0_g5|TRINITY_DN64434_c0_g1|TRI…	77	yes
culmination involved in sorocarp development	GO:0031154	6.72435e-13	1.28684e-10	--	128	TRINITY_DN62500_c1_g1|TRINITY_DN74738_c2_g1|TRINITY_DN37541_c0_g2|TRINITY_DN47708_c0_g2|TRINITY_DN47708_c0_g1|TRINITY_DN77355_c0_g7|TRINITY_DN67379_c0_g1|TRINITY_DN77355_c0_g5|TRINITY_DN77355_c0_g4|TRINITY_DN34594_c0_g1|TRINITY_DN77355_c0_g2|TRINITY_DN34594_c0_g3|TRINITY_DN66821_c0_g2|TRINITY_DN67619_c0_g2|TRINITY_DN67619_c0_g1|TRINITY_DN80720_c0_g2|TRINITY_DN77355_c0_g13|TRINITY_DN66821_c0_g1|TR…	76	--	0	TRINITY_DN77355_c0_g13|TRINITY_DN87415_c0_g1|TRINITY_DN80183_c0_g2|TRINITY_DN77355_c0_g10|TRINITY_DN60607_c0_g1|TRINITY_DN74738_c4_g2|TRINITY_DN37541_c0_g2|TRINITY_DN53436_c0_g2|TRINITY_DN92295_c0_g1|TRINITY_DN31086_c0_g2|TRINITY_DN87415_c1_g3|TRINITY_DN74738_c2_g1|TRINITY_DN62500_c1_g1|TRINITY_DN45443_c0_g1|TRINITY_DN45018_c0_g2|TRINITY_DN105233_c0_g1|TRINITY_DN77355_c0_g15|TRINITY_DN47745_c0_g2…	76	yes
ribosomal small subunit assembly	GO:0000028	7.04424e-13	1.32355e-10	--	516	TRINITY_DN83075_c1_g3|TRINITY_DN64950_c0_g10|TRINITY_DN73120_c1_g2|TRINITY_DN83075_c1_g4|TRINITY_DN83075_c1_g5|TRINITY_DN59919_c0_g3|TRINITY_DN59919_c0_g2|TRINITY_DN72982_c0_g1|TRINITY_DN72387_c0_g1|TRINITY_DN72387_c7_g2|TRINITY_DN46448_c0_g1|TRINITY_DN75799_c0_g1|TRINITY_DN74118_c2_g3|TRINITY_DN67266_c0_g1|TRINITY_DN74118_c2_g7|TRINITY_DN74118_c2_g6|TRINITY_DN31564_c0_g1|TRINITY_DN74118_c2_g4|TR…	225	TRINITY_DN80831_c1_g1|TRINITY_DN77270_c3_g3|TRINITY_DN75889_c5_g2|TRINITY_DN73125_c1_g3|TRINITY_DN80831_c2_g1|TRINITY_DN73203_c0_g3|TRINITY_DN81096_c0_g3|TRINITY_DN25279_c0_g1|TRINITY_DN72387_c1_g1|TRINITY_DN73537_c3_g4|TRINITY_DN73537_c3_g5|TRINITY_DN85683_c0_g1|TRINITY_DN49628_c0_g3|TRINITY_DN72946_c2_g1|TRINITY_DN85522_c4_g6|TRINITY_DN83996_c7_g14|TRINITY_DN79543_c3_g2|TRINITY_DN76743_c4_g7|TR…	78	TRINITY_DN80050_c0_g1|TRINITY_DN74124_c0_g2|TRINITY_DN51491_c0_g1|TRINITY_DN74930_c1_g1|TRINITY_DN79403_c0_g1|TRINITY_DN77406_c3_g2|TRINITY_DN105298_c0_g1|TRINITY_DN82584_c0_g2|TRINITY_DN78240_c3_g2|TRINITY_DN75805_c2_g4|TRINITY_DN73517_c1_g2|TRINITY_DN98330_c0_g1|TRINITY_DN102834_c0_g1|TRINITY_DN76555_c0_g14|TRINITY_DN74873_c0_g2|TRINITY_DN7219_c0_g1|TRINITY_DN81394_c3_g5|TRINITY_DN73010_c0_g1|T…	147	yes
aggregation involved in sorocarp development	GO:0031152	8.45524e-13	1.56029e-10	--	188	TRINITY_DN71699_c3_g2|TRINITY_DN69940_c2_g2|TRINITY_DN69940_c2_g1|TRINITY_DN47536_c0_g2|TRINITY_DN102451_c0_g1|TRINITY_DN104953_c0_g1|TRINITY_DN103816_c0_g1|TRINITY_DN38464_c0_g1|TRINITY_DN38464_c0_g2|TRINITY_DN71953_c0_g5|TRINITY_DN87033_c0_g3|TRINITY_DN72528_c0_g1|TRINITY_DN74483_c1_g3|TRINITY_DN59108_c0_g3|TRINITY_DN70069_c0_g5|TRINITY_DN70069_c0_g2|TRINITY_DN70069_c0_g3|TRINITY_DN61241_c0_g4|…	101	TRINITY_DN47536_c0_g2|TRINITY_DN39913_c0_g2|TRINITY_DN16431_c0_g1|TRINITY_DN65740_c0_g1|TRINITY_DN102451_c0_g1|TRINITY_DN76598_c1_g2|TRINITY_DN65093_c3_g2|TRINITY_DN104953_c0_g1|TRINITY_DN65740_c2_g1|TRINITY_DN38464_c0_g2|TRINITY_DN38464_c0_g1|TRINITY_DN71953_c0_g5|TRINITY_DN69940_c2_g1|TRINITY_DN69940_c2_g2|TRINITY_DN67221_c0_g4|TRINITY_DN71699_c3_g2	16	TRINITY_DN35439_c0_g1|TRINITY_DN66224_c0_g2|TRINITY_DN54731_c0_g1|TRINITY_DN49963_c0_g1|TRINITY_DN56764_c0_g1|TRINITY_DN56764_c0_g2|TRINITY_DN44909_c0_g1|TRINITY_DN99016_c0_g1|TRINITY_DN72528_c0_g1|TRINITY_DN66016_c0_g1|TRINITY_DN71699_c0_g1|TRINITY_DN72380_c3_g1|TRINITY_DN5714_c0_g1|TRINITY_DN81022_c2_g1|TRINITY_DN53585_c0_g1|TRINITY_DN69940_c0_g1|TRINITY_DN73069_c0_g1|TRINITY_DN93394_c0_g1|TRIN…	85	yes
protein polymerization	GO:0051258	4.13336e-12	7.49371e-10	--	297	TRINITY_DN71699_c3_g2|TRINITY_DN62328_c0_g1|TRINITY_DN73975_c1_g1|TRINITY_DN73975_c1_g2|TRINITY_DN73975_c1_g4|TRINITY_DN56897_c0_g1|TRINITY_DN73975_c1_g8|TRINITY_DN71115_c1_g1|TRINITY_DN74093_c1_g2|TRINITY_DN74093_c1_g3|TRINITY_DN74093_c1_g4|TRINITY_DN94002_c0_g1|TRINITY_DN74093_c1_g7|TRINITY_DN23032_c0_g1|TRINITY_DN63921_c0_g2|TRINITY_DN57035_c0_g1|TRINITY_DN70725_c0_g4|TRINITY_DN70725_c0_g3|TRI…	142	TRINITY_DN76380_c1_g3|TRINITY_DN68298_c0_g1|TRINITY_DN9317_c0_g1|TRINITY_DN90107_c0_g1|TRINITY_DN73441_c3_g5|TRINITY_DN22878_c0_g1|TRINITY_DN74093_c0_g1|TRINITY_DN72937_c1_g4|TRINITY_DN29466_c0_g2|TRINITY_DN101763_c0_g1|TRINITY_DN70725_c0_g1|TRINITY_DN74594_c0_g1|TRINITY_DN17003_c0_g1|TRINITY_DN87388_c2_g4|TRINITY_DN73975_c1_g2|TRINITY_DN73975_c1_g1|TRINITY_DN71115_c2_g7|TRINITY_DN71115_c2_g5|TRI…	46	TRINITY_DN61783_c0_g3|TRINITY_DN61783_c0_g1|TRINITY_DN23737_c0_g1|TRINITY_DN87737_c0_g1|TRINITY_DN35804_c0_g1|TRINITY_DN78524_c1_g1|TRINITY_DN23032_c0_g1|TRINITY_DN91148_c0_g1|TRINITY_DN97781_c0_g1|TRINITY_DN77834_c1_g1|TRINITY_DN32520_c0_g1|TRINITY_DN56087_c0_g1|TRINITY_DN34474_c0_g1|TRINITY_DN25345_c0_g1|TRINITY_DN72528_c1_g2|TRINITY_DN66350_c0_g1|TRINITY_DN74093_c1_g2|TRINITY_DN74093_c1_g1|TRI…	96	yes
endocytosis	GO:0006897	5.74459e-12	1.02353e-09	GO:0016193|GO:0016196|GO:0098701	1319	TRINITY_DN62510_c0_g3|TRINITY_DN62510_c0_g1|TRINITY_DN69940_c2_g2|TRINITY_DN69940_c2_g1|TRINITY_DN33941_c0_g2|TRINITY_DN33941_c0_g3|TRINITY_DN54763_c0_g1|TRINITY_DN33941_c0_g1|TRINITY_DN33941_c0_g4|TRINITY_DN80184_c0_g3|TRINITY_DN75839_c1_g2|TRINITY_DN84602_c2_g3|TRINITY_DN40070_c0_g2|TRINITY_DN71652_c1_g1|TRINITY_DN71652_c1_g2|TRINITY_DN56998_c0_g2|TRINITY_DN62500_c3_g2|TRINITY_DN67348_c0_g1|TRI…	495	TRINITY_DN21715_c0_g1|TRINITY_DN90107_c0_g1|TRINITY_DN79430_c1_g6|TRINITY_DN73441_c3_g7|TRINITY_DN104397_c0_g1|TRINITY_DN62510_c0_g1|TRINITY_DN62510_c0_g3|TRINITY_DN74359_c2_g1|TRINITY_DN86646_c0_g1|TRINITY_DN79430_c1_g4|TRINITY_DN72791_c0_g1|TRINITY_DN74424_c2_g3|TRINITY_DN66404_c1_g1|TRINITY_DN83502_c1_g1|TRINITY_DN70853_c1_g1|TRINITY_DN77835_c0_g1|TRINITY_DN72736_c0_g1|TRINITY_DN93615_c0_g1|TR…	168	TRINITY_DN61783_c0_g3|TRINITY_DN75082_c1_g6|TRINITY_DN61783_c0_g1|TRINITY_DN73411_c0_g1|TRINITY_DN66224_c0_g2|TRINITY_DN79430_c1_g5|TRINITY_DN95019_c0_g1|TRINITY_DN79430_c1_g9|TRINITY_DN74424_c0_g1|TRINITY_DN99016_c0_g1|TRINITY_DN9134_c0_g1|TRINITY_DN76040_c1_g2|TRINITY_DN76040_c1_g3|TRINITY_DN82962_c0_g1|TRINITY_DN36985_c0_g1|TRINITY_DN12946_c0_g1|TRINITY_DN42885_c0_g1|TRINITY_DN46511_c0_g2|TRIN…	327	yes
cellular polysaccharide metabolic process	GO:0044264	6.27985e-12	1.09993e-09	--	1797	TRINITY_DN71597_c0_g1|TRINITY_DN74045_c2_g1|TRINITY_DN69815_c0_g2|TRINITY_DN69815_c0_g1|TRINITY_DN91085_c0_g1|TRINITY_DN88500_c0_g1|TRINITY_DN71916_c5_g1|TRINITY_DN64048_c0_g1|TRINITY_DN77053_c0_g1|TRINITY_DN29331_c0_g2|TRINITY_DN29331_c0_g1|TRINITY_DN104285_c0_g1|TRINITY_DN63495_c1_g3|TRINITY_DN100320_c0_g1|TRINITY_DN83383_c2_g7|TRINITY_DN83383_c2_g4|TRINITY_DN65630_c0_g2|TRINITY_DN65630_c0_g3|T…	651	TRINITY_DN36713_c0_g1|TRINITY_DN80021_c2_g1|TRINITY_DN89004_c0_g1|TRINITY_DN80021_c1_g5|TRINITY_DN68386_c0_g1|TRINITY_DN73551_c2_g4|TRINITY_DN18248_c0_g1|TRINITY_DN72751_c0_g1|TRINITY_DN71233_c0_g2|TRINITY_DN71364_c1_g1|TRINITY_DN89752_c0_g1|TRINITY_DN71233_c0_g1|TRINITY_DN68826_c0_g2|TRINITY_DN76110_c0_g5|TRINITY_DN77031_c0_g1|TRINITY_DN77031_c0_g2|TRINITY_DN73551_c3_g1|TRINITY_DN76110_c0_g3|TRI…	290	TRINITY_DN75583_c1_g9|TRINITY_DN75583_c1_g4|TRINITY_DN78605_c1_g5|TRINITY_DN83383_c2_g16|TRINITY_DN78605_c1_g6|TRINITY_DN77031_c0_g3|TRINITY_DN77031_c0_g4|TRINITY_DN36113_c0_g2|TRINITY_DN36113_c0_g3|TRINITY_DN25817_c0_g1|TRINITY_DN91956_c0_g1|TRINITY_DN81787_c0_g3|TRINITY_DN78005_c3_g2|TRINITY_DN42834_c0_g1|TRINITY_DN98274_c0_g1|TRINITY_DN18969_c0_g1|TRINITY_DN81762_c2_g11|TRINITY_DN33523_c0_g1|T…	361	yes
positive regulation of protein polymerization	GO:0032273	7.11407e-12	1.22528e-09	--	320	TRINITY_DN60942_c0_g1|TRINITY_DN71699_c3_g3|TRINITY_DN75064_c3_g2|TRINITY_DN75064_c3_g1|TRINITY_DN29090_c0_g1|TRINITY_DN64970_c2_g2|TRINITY_DN71115_c1_g1|TRINITY_DN94002_c0_g1|TRINITY_DN71699_c3_g4|TRINITY_DN72528_c2_g1|TRINITY_DN71699_c1_g1|TRINITY_DN82195_c4_g1|TRINITY_DN82195_c4_g3|TRINITY_DN38342_c0_g1|TRINITY_DN74594_c0_g1|TRINITY_DN74319_c0_g5|TRINITY_DN87033_c0_g2|TRINITY_DN74483_c1_g3|TRI…	150	TRINITY_DN76380_c1_g3|TRINITY_DN76380_c1_g1|TRINITY_DN21834_c0_g1|TRINITY_DN90107_c0_g1|TRINITY_DN67701_c1_g1|TRINITY_DN73441_c3_g7|TRINITY_DN75909_c6_g1|TRINITY_DN72937_c1_g4|TRINITY_DN29466_c0_g2|TRINITY_DN101763_c0_g1|TRINITY_DN69199_c0_g1|TRINITY_DN74594_c0_g1|TRINITY_DN76558_c1_g1|TRINITY_DN67866_c0_g1|TRINITY_DN17003_c0_g1|TRINITY_DN70814_c0_g1|TRINITY_DN68855_c0_g3|TRINITY_DN72663_c2_g18|T…	49	TRINITY_DN74483_c3_g3|TRINITY_DN74483_c3_g2|TRINITY_DN74483_c3_g1|TRINITY_DN99764_c0_g1|TRINITY_DN75786_c2_g3|TRINITY_DN75064_c3_g1|TRINITY_DN75064_c3_g2|TRINITY_DN91148_c0_g1|TRINITY_DN97781_c0_g1|TRINITY_DN89636_c0_g1|TRINITY_DN87033_c0_g2|TRINITY_DN32520_c0_g1|TRINITY_DN59962_c0_g1|TRINITY_DN34474_c0_g1|TRINITY_DN25345_c0_g1|TRINITY_DN72528_c1_g1|TRINITY_DN82195_c4_g3|TRINITY_DN82195_c4_g1|TRI…	101	yes
actin filament polymerization	GO:0030041	7.30333e-12	1.23726e-09	--	166	TRINITY_DN71699_c3_g2|TRINITY_DN56897_c0_g1|TRINITY_DN59490_c0_g1|TRINITY_DN71115_c1_g1|TRINITY_DN94002_c0_g1|TRINITY_DN23032_c0_g1|TRINITY_DN57035_c0_g1|TRINITY_DN70725_c0_g4|TRINITY_DN70725_c0_g3|TRINITY_DN70725_c0_g1|TRINITY_DN74594_c0_g1|TRINITY_DN62671_c0_g1|TRINITY_DN72528_c0_g1|TRINITY_DN74483_c1_g3|TRINITY_DN82195_c5_g1|TRINITY_DN76232_c1_g1|TRINITY_DN95623_c0_g1|TRINITY_DN17003_c0_g1|TRI…	90	TRINITY_DN76380_c1_g3|TRINITY_DN76380_c1_g1|TRINITY_DN90107_c0_g1|TRINITY_DN73441_c3_g5|TRINITY_DN72937_c1_g4|TRINITY_DN29466_c0_g2|TRINITY_DN101763_c0_g1|TRINITY_DN70725_c0_g1|TRINITY_DN74594_c0_g1|TRINITY_DN17003_c0_g1|TRINITY_DN72663_c2_g18|TRINITY_DN71115_c2_g7|TRINITY_DN71115_c2_g5|TRINITY_DN57035_c0_g1|TRINITY_DN50403_c0_g1|TRINITY_DN76232_c1_g1|TRINITY_DN83565_c2_g3|TRINITY_DN77829_c0_g1|T…	28	TRINITY_DN61783_c0_g3|TRINITY_DN77834_c1_g1|TRINITY_DN61783_c0_g1|TRINITY_DN1764_c0_g2|TRINITY_DN75729_c1_g2|TRINITY_DN56897_c0_g1|TRINITY_DN35397_c0_g2|TRINITY_DN72528_c0_g1|TRINITY_DN71699_c0_g1|TRINITY_DN70725_c0_g3|TRINITY_DN72663_c2_g15|TRINITY_DN70725_c0_g4|TRINITY_DN88794_c0_g1|TRINITY_DN67221_c0_g2|TRINITY_DN97365_c0_g1|TRINITY_DN51418_c0_g1|TRINITY_DN102974_c0_g1|TRINITY_DN62671_c0_g1|TR…	62	yes
cell adhesion	GO:0007155	9.76555e-12	1.6277e-09	GO:0098602	607	TRINITY_DN60942_c0_g1|TRINITY_DN75082_c1_g4|TRINITY_DN34717_c0_g2|TRINITY_DN83604_c0_g5|TRINITY_DN56998_c0_g2|TRINITY_DN63608_c2_g3|TRINITY_DN54763_c0_g1|TRINITY_DN75081_c0_g1|TRINITY_DN24338_c0_g1|TRINITY_DN69072_c0_g2|TRINITY_DN76437_c5_g1|TRINITY_DN44616_c0_g1|TRINITY_DN61660_c0_g2|TRINITY_DN104953_c0_g1|TRINITY_DN17319_c0_g1|TRINITY_DN58566_c0_g1|TRINITY_DN36295_c0_g3|TRINITY_DN57666_c0_g2|TR…	253	TRINITY_DN54822_c0_g2|TRINITY_DN93500_c0_g1|TRINITY_DN75082_c1_g4|TRINITY_DN36295_c0_g3|TRINITY_DN72021_c2_g3|TRINITY_DN68568_c4_g2|TRINITY_DN80414_c0_g4|TRINITY_DN60931_c1_g3|TRINITY_DN76134_c0_g1|TRINITY_DN60836_c0_g1|TRINITY_DN58888_c0_g2|TRINITY_DN57666_c0_g2|TRINITY_DN57666_c0_g3|TRINITY_DN86144_c0_g1|TRINITY_DN8319_c0_g1|TRINITY_DN67221_c0_g4|TRINITY_DN83498_c1_g3|TRINITY_DN73466_c1_g3|TRIN…	75	TRINITY_DN80183_c0_g2|TRINITY_DN66224_c0_g2|TRINITY_DN78362_c2_g2|TRINITY_DN20396_c0_g1|TRINITY_DN76134_c0_g3|TRINITY_DN35059_c0_g2|TRINITY_DN68750_c0_g3|TRINITY_DN84568_c0_g1|TRINITY_DN76134_c0_g9|TRINITY_DN76134_c0_g5|TRINITY_DN75081_c0_g1|TRINITY_DN45443_c0_g1|TRINITY_DN72441_c0_g2|TRINITY_DN47465_c0_g2|TRINITY_DN44752_c0_g1|TRINITY_DN91956_c0_g1|TRINITY_DN61111_c0_g1|TRINITY_DN75100_c0_g11|TR…	178	yes
response to cAMP	GO:0051591	1.40603e-11	2.30633e-09	--	129	TRINITY_DN42783_c0_g2|TRINITY_DN84156_c3_g9|TRINITY_DN80128_c0_g1|TRINITY_DN83047_c4_g1|TRINITY_DN72810_c1_g1|TRINITY_DN38128_c0_g1|TRINITY_DN26128_c0_g1|TRINITY_DN76584_c0_g7|TRINITY_DN67353_c0_g3|TRINITY_DN75635_c0_g1|TRINITY_DN76584_c0_g3|TRINITY_DN67105_c0_g3|TRINITY_DN54738_c0_g1|TRINITY_DN71909_c1_g1|TRINITY_DN31445_c0_g1|TRINITY_DN67619_c0_g2|TRINITY_DN67619_c0_g1|TRINITY_DN42783_c0_g1|TRI…	74	TRINITY_DN44444_c0_g2|TRINITY_DN84156_c3_g9|TRINITY_DN77077_c3_g2|TRINITY_DN80128_c0_g1|TRINITY_DN52972_c0_g2|TRINITY_DN75439_c4_g8|TRINITY_DN56726_c1_g2|TRINITY_DN67105_c0_g3|TRINITY_DN48581_c0_g1	9	TRINITY_DN68277_c0_g1|TRINITY_DN60653_c0_g1|TRINITY_DN54738_c0_g1|TRINITY_DN31896_c0_g2|TRINITY_DN1303_c0_g1|TRINITY_DN31445_c0_g1|TRINITY_DN61550_c0_g2|TRINITY_DN75342_c4_g3|TRINITY_DN82962_c0_g1|TRINITY_DN6679_c0_g1|TRINITY_DN86055_c0_g1|TRINITY_DN42885_c0_g1|TRINITY_DN56404_c0_g1|TRINITY_DN71909_c1_g1|TRINITY_DN91823_c0_g1|TRINITY_DN80184_c1_g1|TRINITY_DN75312_c2_g2|TRINITY_DN89227_c0_g1|TRINI…	65	yes
drug metabolic process	GO:0017144	1.58467e-11	2.55875e-09	--	5007	TRINITY_DN103242_c0_g1|TRINITY_DN75785_c4_g10|TRINITY_DN68183_c0_g1|TRINITY_DN83048_c1_g1|TRINITY_DN95257_c0_g1|TRINITY_DN77806_c2_g1|TRINITY_DN75436_c4_g1|TRINITY_DN82637_c1_g2|TRINITY_DN66740_c0_g1|TRINITY_DN79605_c2_g1|TRINITY_DN7068_c0_g1|TRINITY_DN7068_c0_g2|TRINITY_DN79605_c2_g2|TRINITY_DN79605_c2_g5|TRINITY_DN79605_c2_g4|TRINITY_DN83383_c2_g5|TRINITY_DN83383_c2_g4|TRINITY_DN83383_c2_g9|TRI…	1656	TRINITY_DN78029_c1_g1|TRINITY_DN72417_c0_g7|TRINITY_DN81479_c0_g1|TRINITY_DN77392_c1_g3|TRINITY_DN85022_c1_g2|TRINITY_DN67777_c0_g3|TRINITY_DN78740_c0_g2|TRINITY_DN71372_c0_g1|TRINITY_DN76553_c0_g1|TRINITY_DN98429_c0_g1|TRINITY_DN72632_c0_g3|TRINITY_DN63867_c0_g1|TRINITY_DN44953_c0_g1|TRINITY_DN61473_c1_g1|TRINITY_DN58310_c0_g1|TRINITY_DN21966_c0_g1|TRINITY_DN77495_c0_g3|TRINITY_DN70473_c1_g1|TRI…	699	TRINITY_DN64880_c0_g2|TRINITY_DN73308_c2_g2|TRINITY_DN79075_c3_g3|TRINITY_DN76262_c1_g4|TRINITY_DN62309_c0_g2|TRINITY_DN78940_c3_g6|TRINITY_DN83383_c2_g17|TRINITY_DN83383_c2_g16|TRINITY_DN77392_c1_g5|TRINITY_DN77392_c1_g6|TRINITY_DN77392_c1_g1|TRINITY_DN24316_c0_g2|TRINITY_DN24316_c0_g1|TRINITY_DN82607_c6_g2|TRINITY_DN89730_c0_g1|TRINITY_DN77228_c4_g1|TRINITY_DN78940_c3_g2|TRINITY_DN25046_c0_g1|T…	957	yes
positive regulation of supramolecular fiber organization	GO:1902905	1.89406e-11	3.01126e-09	--	383	TRINITY_DN60942_c0_g1|TRINITY_DN71699_c3_g3|TRINITY_DN75064_c3_g2|TRINITY_DN75064_c3_g1|TRINITY_DN97781_c0_g1|TRINITY_DN74757_c2_g4|TRINITY_DN29090_c0_g1|TRINITY_DN64970_c2_g2|TRINITY_DN71115_c1_g1|TRINITY_DN94002_c0_g1|TRINITY_DN71699_c3_g4|TRINITY_DN72528_c2_g1|TRINITY_DN59454_c0_g1|TRINITY_DN95774_c0_g1|TRINITY_DN71699_c1_g1|TRINITY_DN82195_c4_g1|TRINITY_DN82195_c4_g3|TRINITY_DN38342_c0_g1|TRI…	172	TRINITY_DN76380_c1_g3|TRINITY_DN73441_c3_g2|TRINITY_DN21834_c0_g1|TRINITY_DN90107_c0_g1|TRINITY_DN67701_c1_g1|TRINITY_DN73441_c3_g7|TRINITY_DN75909_c6_g1|TRINITY_DN72937_c1_g4|TRINITY_DN59454_c0_g1|TRINITY_DN101763_c0_g1|TRINITY_DN69199_c0_g1|TRINITY_DN74594_c0_g1|TRINITY_DN76558_c1_g1|TRINITY_DN67866_c0_g1|TRINITY_DN67701_c0_g1|TRINITY_DN100422_c0_g1|TRINITY_DN17003_c0_g1|TRINITY_DN70814_c0_g1|T…	57	TRINITY_DN61783_c0_g3|TRINITY_DN61783_c0_g1|TRINITY_DN74483_c3_g3|TRINITY_DN74483_c3_g2|TRINITY_DN74483_c3_g1|TRINITY_DN99764_c0_g1|TRINITY_DN75786_c2_g3|TRINITY_DN75064_c3_g1|TRINITY_DN75064_c3_g2|TRINITY_DN91148_c0_g1|TRINITY_DN97781_c0_g1|TRINITY_DN89636_c0_g1|TRINITY_DN87033_c0_g2|TRINITY_DN32520_c0_g1|TRINITY_DN59962_c0_g1|TRINITY_DN34474_c0_g1|TRINITY_DN25345_c0_g1|TRINITY_DN72528_c1_g1|TRI…	115	yes
transmembrane transport	GO:0055085	2.20545e-11	3.45319e-09	--	6074	TRINITY_DN48400_c0_g3|TRINITY_DN88938_c0_g1|TRINITY_DN72536_c0_g10|TRINITY_DN77403_c1_g2|TRINITY_DN77403_c1_g3|TRINITY_DN77403_c1_g1|TRINITY_DN77403_c1_g6|TRINITY_DN77403_c1_g7|TRINITY_DN93582_c0_g1|TRINITY_DN3189_c0_g1|TRINITY_DN72434_c0_g2|TRINITY_DN72434_c0_g4|TRINITY_DN71781_c5_g1|TRINITY_DN71781_c5_g3|TRINITY_DN55109_c0_g2|TRINITY_DN74602_c1_g1|TRINITY_DN80501_c1_g10|TRINITY_DN80050_c0_g1|TR…	1982	TRINITY_DN78084_c3_g4|TRINITY_DN78166_c0_g1|TRINITY_DN76163_c0_g1|TRINITY_DN85794_c1_g1|TRINITY_DN58116_c0_g2|TRINITY_DN77270_c3_g3|TRINITY_DN88256_c0_g1|TRINITY_DN36062_c0_g1|TRINITY_DN27198_c0_g1|TRINITY_DN58795_c0_g3|TRINITY_DN61258_c0_g2|TRINITY_DN74995_c0_g1|TRINITY_DN70574_c0_g1|TRINITY_DN77392_c1_g3|TRINITY_DN73343_c1_g3|TRINITY_DN93524_c0_g1|TRINITY_DN43063_c0_g1|TRINITY_DN52982_c0_g1|TRI…	970	TRINITY_DN80050_c0_g1|TRINITY_DN94176_c0_g1|TRINITY_DN83933_c0_g3|TRINITY_DN96743_c0_g1|TRINITY_DN65595_c0_g1|TRINITY_DN76163_c0_g4|TRINITY_DN97814_c0_g1|TRINITY_DN85593_c1_g2|TRINITY_DN82091_c1_g2|TRINITY_DN90890_c0_g1|TRINITY_DN75835_c1_g11|TRINITY_DN101609_c0_g1|TRINITY_DN53029_c0_g1|TRINITY_DN68737_c2_g1|TRINITY_DN31092_c0_g2|TRINITY_DN77392_c1_g5|TRINITY_DN67006_c5_g2|TRINITY_DN77392_c1_g6|T…	1012	yes
biological adhesion	GO:0022610	2.71949e-11	4.19451e-09	--	638	TRINITY_DN60942_c0_g1|TRINITY_DN75082_c1_g4|TRINITY_DN34717_c0_g2|TRINITY_DN83604_c0_g5|TRINITY_DN56998_c0_g2|TRINITY_DN63608_c2_g3|TRINITY_DN54763_c0_g1|TRINITY_DN75081_c0_g1|TRINITY_DN24338_c0_g1|TRINITY_DN33655_c0_g1|TRINITY_DN69072_c0_g2|TRINITY_DN76437_c5_g1|TRINITY_DN44616_c0_g1|TRINITY_DN61660_c0_g2|TRINITY_DN104953_c0_g1|TRINITY_DN76134_c0_g1|TRINITY_DN17319_c0_g1|TRINITY_DN58566_c0_g1|TR…	262	TRINITY_DN54822_c0_g2|TRINITY_DN93500_c0_g1|TRINITY_DN75082_c1_g4|TRINITY_DN36295_c0_g3|TRINITY_DN78029_c2_g1|TRINITY_DN68568_c4_g2|TRINITY_DN80414_c0_g4|TRINITY_DN60931_c1_g3|TRINITY_DN76134_c0_g1|TRINITY_DN60836_c0_g1|TRINITY_DN58888_c0_g2|TRINITY_DN57666_c0_g2|TRINITY_DN57666_c0_g3|TRINITY_DN86144_c0_g1|TRINITY_DN8319_c0_g1|TRINITY_DN67221_c0_g4|TRINITY_DN83498_c1_g3|TRINITY_DN73466_c1_g3|TRIN…	77	TRINITY_DN6872_c0_g1|TRINITY_DN80183_c0_g2|TRINITY_DN66224_c0_g2|TRINITY_DN72528_c1_g1|TRINITY_DN20396_c0_g1|TRINITY_DN76134_c0_g3|TRINITY_DN35059_c0_g2|TRINITY_DN58566_c0_g1|TRINITY_DN84568_c0_g1|TRINITY_DN76134_c0_g9|TRINITY_DN76134_c0_g5|TRINITY_DN75081_c0_g1|TRINITY_DN45443_c0_g1|TRINITY_DN48032_c0_g1|TRINITY_DN72441_c0_g2|TRINITY_DN47465_c0_g2|TRINITY_DN44752_c0_g1|TRINITY_DN91956_c0_g1|TRIN…	185	yes
cellular carbohydrate metabolic process	GO:0044262	4.4086e-11	6.69978e-09	GO:0006092	2747	TRINITY_DN75943_c2_g4|TRINITY_DN87343_c1_g1|TRINITY_DN67825_c2_g1|TRINITY_DN76393_c2_g1|TRINITY_DN71597_c0_g1|TRINITY_DN25505_c0_g1|TRINITY_DN74045_c2_g1|TRINITY_DN69815_c0_g2|TRINITY_DN69815_c0_g1|TRINITY_DN82606_c0_g1|TRINITY_DN91085_c0_g1|TRINITY_DN21733_c0_g1|TRINITY_DN35205_c0_g3|TRINITY_DN88500_c0_g1|TRINITY_DN71916_c5_g1|TRINITY_DN64048_c0_g1|TRINITY_DN42552_c0_g1|TRINITY_DN29331_c0_g2|TRI…	948	TRINITY_DN73714_c3_g3|TRINITY_DN73714_c3_g6|TRINITY_DN68386_c0_g1|TRINITY_DN73456_c0_g2|TRINITY_DN18248_c0_g1|TRINITY_DN80021_c2_g1|TRINITY_DN72021_c0_g1|TRINITY_DN71233_c0_g2|TRINITY_DN71364_c1_g1|TRINITY_DN71233_c0_g1|TRINITY_DN68826_c0_g2|TRINITY_DN77031_c0_g1|TRINITY_DN77031_c0_g2|TRINITY_DN21098_c0_g1|TRINITY_DN13341_c0_g1|TRINITY_DN76736_c0_g1|TRINITY_DN100384_c0_g1|TRINITY_DN67357_c0_g1|TR…	413	TRINITY_DN75583_c1_g9|TRINITY_DN72441_c0_g2|TRINITY_DN15609_c0_g2|TRINITY_DN72441_c0_g4|TRINITY_DN75583_c1_g4|TRINITY_DN78605_c1_g5|TRINITY_DN83383_c2_g16|TRINITY_DN78605_c1_g6|TRINITY_DN77031_c0_g3|TRINITY_DN77031_c0_g4|TRINITY_DN36113_c0_g2|TRINITY_DN36113_c0_g3|TRINITY_DN25817_c0_g1|TRINITY_DN86424_c3_g4|TRINITY_DN91956_c0_g1|TRINITY_DN81787_c0_g3|TRINITY_DN78005_c3_g2|TRINITY_DN73686_c3_g1|TR…	535	yes
small molecule metabolic process	GO:0044281	5.0514e-11	7.56539e-09	--	14120	TRINITY_DN75808_c1_g3|TRINITY_DN79254_c2_g1|TRINITY_DN60962_c0_g2|TRINITY_DN75808_c1_g6|TRINITY_DN75808_c1_g4|TRINITY_DN78142_c3_g1|TRINITY_DN84494_c1_g1|TRINITY_DN84494_c1_g2|TRINITY_DN62132_c0_g1|TRINITY_DN2633_c0_g1|TRINITY_DN68183_c0_g1|TRINITY_DN58202_c1_g1|TRINITY_DN70824_c0_g2|TRINITY_DN95257_c0_g1|TRINITY_DN59603_c0_g1|TRINITY_DN77806_c2_g1|TRINITY_DN24629_c0_g2|TRINITY_DN75436_c4_g1|TRIN…	4401	TRINITY_DN76902_c0_g10|TRINITY_DN73714_c3_g3|TRINITY_DN81199_c4_g1|TRINITY_DN53340_c0_g1|TRINITY_DN53340_c0_g3|TRINITY_DN73714_c3_g6|TRINITY_DN76972_c1_g2|TRINITY_DN68506_c0_g2|TRINITY_DN68506_c0_g1|TRINITY_DN77392_c1_g3|TRINITY_DN69611_c0_g4|TRINITY_DN76508_c2_g8|TRINITY_DN69866_c2_g1|TRINITY_DN73926_c1_g1|TRINITY_DN8173_c0_g1|TRINITY_DN67836_c1_g2|TRINITY_DN46949_c0_g2|TRINITY_DN84660_c0_g1|TRI…	1916	TRINITY_DN80183_c0_g1|TRINITY_DN24367_c0_g1|TRINITY_DN76972_c1_g4|TRINITY_DN76972_c1_g3|TRINITY_DN76972_c1_g1|TRINITY_DN89189_c0_g1|TRINITY_DN77392_c1_g5|TRINITY_DN72441_c0_g2|TRINITY_DN77392_c1_g6|TRINITY_DN77392_c1_g1|TRINITY_DN69611_c0_g2|TRINITY_DN75945_c0_g9|TRINITY_DN58484_c0_g3|TRINITY_DN39989_c0_g3|TRINITY_DN78068_c4_g1|TRINITY_DN39989_c0_g1|TRINITY_DN46760_c0_g1|TRINITY_DN59409_c0_g1|TRI…	2485	yes
positive regulation of actin filament polymerization	GO:0030838	5.63317e-11	8.31617e-09	--	279	TRINITY_DN60942_c0_g1|TRINITY_DN71699_c3_g4|TRINITY_DN75064_c3_g1|TRINITY_DN29090_c0_g1|TRINITY_DN71115_c1_g1|TRINITY_DN94002_c0_g1|TRINITY_DN75064_c3_g2|TRINITY_DN72528_c2_g1|TRINITY_DN71699_c1_g1|TRINITY_DN38342_c0_g1|TRINITY_DN74594_c0_g1|TRINITY_DN74319_c0_g5|TRINITY_DN70814_c0_g1|TRINITY_DN74483_c1_g3|TRINITY_DN74483_c1_g1|TRINITY_DN74483_c1_g4|TRINITY_DN89636_c0_g1|TRINITY_DN74483_c2_g1|TRI…	132	TRINITY_DN76380_c1_g3|TRINITY_DN76380_c1_g1|TRINITY_DN21834_c0_g1|TRINITY_DN90107_c0_g1|TRINITY_DN67701_c1_g1|TRINITY_DN73441_c3_g7|TRINITY_DN75909_c6_g1|TRINITY_DN72937_c1_g4|TRINITY_DN29466_c0_g2|TRINITY_DN101763_c0_g1|TRINITY_DN69199_c0_g1|TRINITY_DN74594_c0_g1|TRINITY_DN76558_c1_g1|TRINITY_DN17003_c0_g1|TRINITY_DN50654_c0_g1|TRINITY_DN68855_c0_g3|TRINITY_DN72663_c2_g18|TRINITY_DN81089_c0_g1|T…	45	TRINITY_DN74483_c3_g3|TRINITY_DN74483_c3_g2|TRINITY_DN74483_c3_g1|TRINITY_DN99764_c0_g1|TRINITY_DN75064_c3_g1|TRINITY_DN75064_c3_g2|TRINITY_DN91148_c0_g1|TRINITY_DN97781_c0_g1|TRINITY_DN89636_c0_g1|TRINITY_DN32520_c0_g1|TRINITY_DN59962_c0_g1|TRINITY_DN34474_c0_g1|TRINITY_DN25345_c0_g1|TRINITY_DN75786_c2_g3|TRINITY_DN94327_c0_g1|TRINITY_DN71572_c0_g1|TRINITY_DN74483_c2_g1|TRINITY_DN51461_c0_g3|TRI…	87	yes
positive regulation of cytoskeleton organization	GO:0051495	5.74663e-11	8.36418e-09	--	454	TRINITY_DN60942_c0_g1|TRINITY_DN71699_c3_g3|TRINITY_DN71699_c3_g4|TRINITY_DN75064_c3_g1|TRINITY_DN74757_c2_g4|TRINITY_DN29090_c0_g1|TRINITY_DN76122_c2_g2|TRINITY_DN76122_c2_g1|TRINITY_DN76122_c2_g7|TRINITY_DN59962_c0_g1|TRINITY_DN71115_c1_g1|TRINITY_DN94002_c0_g1|TRINITY_DN75064_c3_g2|TRINITY_DN72528_c2_g1|TRINITY_DN59454_c0_g1|TRINITY_DN95774_c0_g1|TRINITY_DN71699_c1_g1|TRINITY_DN82195_c4_g1|TRI…	196	TRINITY_DN76380_c1_g3|TRINITY_DN59454_c0_g1|TRINITY_DN21834_c0_g1|TRINITY_DN90107_c0_g1|TRINITY_DN67701_c1_g1|TRINITY_DN73441_c3_g7|TRINITY_DN75909_c6_g1|TRINITY_DN72937_c1_g4|TRINITY_DN73441_c3_g2|TRINITY_DN101763_c0_g1|TRINITY_DN69199_c0_g1|TRINITY_DN74594_c0_g1|TRINITY_DN76558_c1_g1|TRINITY_DN67701_c0_g1|TRINITY_DN100422_c0_g1|TRINITY_DN17003_c0_g1|TRINITY_DN50654_c0_g1|TRINITY_DN74757_c2_g4|T…	62	TRINITY_DN61783_c0_g3|TRINITY_DN61783_c0_g1|TRINITY_DN99764_c0_g1|TRINITY_DN74483_c3_g2|TRINITY_DN74483_c3_g1|TRINITY_DN60607_c0_g2|TRINITY_DN45443_c0_g1|TRINITY_DN60607_c0_g1|TRINITY_DN75786_c2_g3|TRINITY_DN75064_c3_g1|TRINITY_DN80961_c3_g4|TRINITY_DN75064_c3_g2|TRINITY_DN21180_c0_g1|TRINITY_DN91148_c0_g1|TRINITY_DN97781_c0_g1|TRINITY_DN89636_c0_g1|TRINITY_DN87033_c0_g2|TRINITY_DN32520_c0_g1|TRI…	134	yes
lipid transport	GO:0006869	5.8562e-11	8.40527e-09	--	906	TRINITY_DN62510_c0_g3|TRINITY_DN62510_c0_g1|TRINITY_DN62510_c0_g4|TRINITY_DN80885_c1_g1|TRINITY_DN69664_c0_g1|TRINITY_DN69664_c0_g3|TRINITY_DN69664_c0_g2|TRINITY_DN63283_c0_g2|TRINITY_DN63283_c0_g3|TRINITY_DN76165_c0_g4|TRINITY_DN76165_c0_g3|TRINITY_DN76165_c0_g2|TRINITY_DN76165_c0_g1|TRINITY_DN42605_c0_g2|TRINITY_DN19216_c0_g1|TRINITY_DN40070_c0_g2|TRINITY_DN76644_c4_g15|TRINITY_DN98366_c0_g1|TR…	352	TRINITY_DN29288_c0_g2|TRINITY_DN62510_c0_g4|TRINITY_DN104397_c0_g1|TRINITY_DN62510_c0_g1|TRINITY_DN62510_c0_g3|TRINITY_DN63724_c1_g2|TRINITY_DN63724_c1_g5|TRINITY_DN67700_c0_g1|TRINITY_DN70639_c0_g3|TRINITY_DN73146_c0_g3|TRINITY_DN73146_c0_g2|TRINITY_DN68582_c0_g1|TRINITY_DN76165_c0_g4|TRINITY_DN60715_c0_g7|TRINITY_DN76165_c0_g1|TRINITY_DN72364_c1_g3|TRINITY_DN46611_c0_g1|TRINITY_DN85997_c1_g1|TR…	137	TRINITY_DN72568_c0_g1|TRINITY_DN59916_c1_g1|TRINITY_DN83509_c2_g3|TRINITY_DN87735_c0_g1|TRINITY_DN38700_c0_g1|TRINITY_DN33708_c0_g2|TRINITY_DN62309_c0_g3|TRINITY_DN79841_c0_g1|TRINITY_DN98366_c0_g1|TRINITY_DN49448_c0_g1|TRINITY_DN73146_c0_g6|TRINITY_DN51623_c0_g2|TRINITY_DN84770_c0_g3|TRINITY_DN78224_c0_g1|TRINITY_DN103238_c0_g1|TRINITY_DN37937_c0_g2|TRINITY_DN37937_c0_g1|TRINITY_DN60715_c0_g6|TR…	215	yes
aggregation of unicellular organisms	GO:0098630	6.226e-11	8.81362e-09	--	214	TRINITY_DN71699_c3_g2|TRINITY_DN69940_c2_g2|TRINITY_DN69940_c2_g1|TRINITY_DN47536_c0_g2|TRINITY_DN102451_c0_g1|TRINITY_DN104953_c0_g1|TRINITY_DN103816_c0_g1|TRINITY_DN38464_c0_g1|TRINITY_DN38464_c0_g2|TRINITY_DN71953_c0_g5|TRINITY_DN87033_c0_g3|TRINITY_DN72528_c0_g1|TRINITY_DN74483_c1_g3|TRINITY_DN59108_c0_g3|TRINITY_DN72615_c1_g6|TRINITY_DN72615_c1_g7|TRINITY_DN70069_c0_g2|TRINITY_DN70069_c0_g3|…	107	TRINITY_DN90693_c0_g1|TRINITY_DN47536_c0_g2|TRINITY_DN39913_c0_g2|TRINITY_DN72615_c1_g6|TRINITY_DN62366_c0_g2|TRINITY_DN16431_c0_g1|TRINITY_DN65740_c0_g1|TRINITY_DN71210_c1_g2|TRINITY_DN102451_c0_g1|TRINITY_DN76598_c1_g2|TRINITY_DN65093_c3_g2|TRINITY_DN104953_c0_g1|TRINITY_DN65740_c2_g1|TRINITY_DN38464_c0_g2|TRINITY_DN38464_c0_g1|TRINITY_DN71953_c0_g5|TRINITY_DN69940_c2_g1|TRINITY_DN69940_c2_g2|T…	20	TRINITY_DN66224_c0_g2|TRINITY_DN49963_c0_g1|TRINITY_DN56764_c0_g1|TRINITY_DN56764_c0_g2|TRINITY_DN99016_c0_g1|TRINITY_DN66016_c0_g1|TRINITY_DN99481_c0_g1|TRINITY_DN77773_c0_g1|TRINITY_DN64208_c0_g2|TRINITY_DN78524_c1_g1|TRINITY_DN35439_c0_g1|TRINITY_DN73069_c0_g1|TRINITY_DN21915_c0_g1|TRINITY_DN51754_c0_g2|TRINITY_DN76598_c0_g4|TRINITY_DN87033_c0_g3|TRINITY_DN99987_c0_g1|TRINITY_DN50554_c0_g1|TRI…	87	yes
regulation of protein complex assembly	GO:0043254	8.30024e-11	1.15912e-08	--	944	TRINITY_DN69940_c2_g2|TRINITY_DN69940_c2_g1|TRINITY_DN53530_c0_g1|TRINITY_DN82195_c4_g1|TRINITY_DN82195_c4_g3|TRINITY_DN38342_c0_g1|TRINITY_DN74483_c2_g1|TRINITY_DN62950_c0_g1|TRINITY_DN76232_c1_g1|TRINITY_DN60607_c0_g4|TRINITY_DN95623_c0_g1|TRINITY_DN17003_c0_g1|TRINITY_DN46601_c0_g2|TRINITY_DN73704_c1_g10|TRINITY_DN87830_c0_g1|TRINITY_DN101763_c0_g1|TRINITY_DN74198_c0_g1|TRINITY_DN30498_c0_g1|T…	364	TRINITY_DN73441_c3_g2|TRINITY_DN90107_c0_g1|TRINITY_DN73441_c3_g5|TRINITY_DN73441_c3_g7|TRINITY_DN72937_c1_g6|TRINITY_DN72937_c1_g4|TRINITY_DN34254_c0_g1|TRINITY_DN64830_c0_g2|TRINITY_DN72580_c2_g1|TRINITY_DN60816_c0_g1|TRINITY_DN72027_c9_g2|TRINITY_DN62633_c0_g1|TRINITY_DN59366_c1_g4|TRINITY_DN69940_c2_g1|TRINITY_DN69940_c2_g2|TRINITY_DN56125_c0_g3|TRINITY_DN56125_c0_g2|TRINITY_DN66330_c0_g6|TRI…	130	TRINITY_DN60607_c0_g4|TRINITY_DN99764_c0_g1|TRINITY_DN74483_c3_g2|TRINITY_DN74483_c3_g1|TRINITY_DN83296_c2_g1|TRINITY_DN93968_c0_g1|TRINITY_DN56764_c0_g1|TRINITY_DN56764_c0_g2|TRINITY_DN75752_c1_g7|TRINITY_DN78157_c2_g3|TRINITY_DN62950_c0_g1|TRINITY_DN80765_c2_g4|TRINITY_DN31491_c0_g1|TRINITY_DN31491_c0_g2|TRINITY_DN99481_c0_g1|TRINITY_DN75786_c2_g3|TRINITY_DN12184_c0_g1|TRINITY_DN72315_c3_g2|TRI…	234	yes
phosphate ion transport	GO:0006817	9.32218e-11	1.28447e-08	--	286	TRINITY_DN79693_c5_g1|TRINITY_DN53327_c0_g4|TRINITY_DN79693_c5_g5|TRINITY_DN79693_c5_g4|TRINITY_DN79693_c5_g6|TRINITY_DN73230_c0_g1|TRINITY_DN77536_c2_g2|TRINITY_DN77536_c2_g1|TRINITY_DN80182_c3_g10|TRINITY_DN80182_c3_g11|TRINITY_DN53327_c0_g3|TRINITY_DN73186_c4_g1|TRINITY_DN73186_c4_g3|TRINITY_DN73186_c4_g2|TRINITY_DN15408_c0_g2|TRINITY_DN74602_c1_g1|TRINITY_DN15408_c0_g1|TRINITY_DN84051_c2_g4|T…	134	TRINITY_DN81673_c0_g4|TRINITY_DN53327_c0_g4|TRINITY_DN20368_c0_g2|TRINITY_DN84051_c2_g1|TRINITY_DN79693_c5_g6|TRINITY_DN53327_c0_g3|TRINITY_DN85251_c1_g3|TRINITY_DN72692_c3_g2|TRINITY_DN77485_c3_g1|TRINITY_DN85251_c1_g5|TRINITY_DN33441_c0_g1|TRINITY_DN80607_c1_g1|TRINITY_DN68586_c0_g10|TRINITY_DN77420_c3_g1|TRINITY_DN77420_c0_g1|TRINITY_DN84327_c0_g4|TRINITY_DN73993_c1_g1|TRINITY_DN84327_c0_g9|TR…	57	TRINITY_DN81673_c0_g1|TRINITY_DN13072_c0_g1|TRINITY_DN96743_c0_g1|TRINITY_DN96723_c0_g1|TRINITY_DN81673_c0_g6|TRINITY_DN80182_c0_g1|TRINITY_DN84051_c2_g7|TRINITY_DN79693_c5_g1|TRINITY_DN86808_c0_g2|TRINITY_DN79693_c5_g5|TRINITY_DN80182_c3_g3|TRINITY_DN85251_c1_g2|TRINITY_DN73993_c2_g4|TRINITY_DN80182_c3_g6|TRINITY_DN27331_c0_g1|TRINITY_DN73993_c2_g3|TRINITY_DN73993_c2_g2|TRINITY_DN73993_c2_g1|TRI…	77	yes
cell aggregation	GO:0098743	1.2595e-10	1.71259e-08	--	216	TRINITY_DN71699_c3_g2|TRINITY_DN69940_c2_g2|TRINITY_DN69940_c2_g1|TRINITY_DN47536_c0_g2|TRINITY_DN102451_c0_g1|TRINITY_DN104953_c0_g1|TRINITY_DN103816_c0_g1|TRINITY_DN38464_c0_g1|TRINITY_DN38464_c0_g2|TRINITY_DN71953_c0_g5|TRINITY_DN87033_c0_g3|TRINITY_DN72528_c0_g1|TRINITY_DN74483_c1_g3|TRINITY_DN59108_c0_g3|TRINITY_DN72615_c1_g6|TRINITY_DN72615_c1_g7|TRINITY_DN70069_c0_g2|TRINITY_DN70069_c0_g3|…	107	TRINITY_DN90693_c0_g1|TRINITY_DN47536_c0_g2|TRINITY_DN39913_c0_g2|TRINITY_DN72615_c1_g6|TRINITY_DN62366_c0_g2|TRINITY_DN16431_c0_g1|TRINITY_DN65740_c0_g1|TRINITY_DN71210_c1_g2|TRINITY_DN102451_c0_g1|TRINITY_DN76598_c1_g2|TRINITY_DN65093_c3_g2|TRINITY_DN104953_c0_g1|TRINITY_DN65740_c2_g1|TRINITY_DN38464_c0_g2|TRINITY_DN38464_c0_g1|TRINITY_DN71953_c0_g5|TRINITY_DN69940_c2_g1|TRINITY_DN69940_c2_g2|T…	20	TRINITY_DN66224_c0_g2|TRINITY_DN49963_c0_g1|TRINITY_DN56764_c0_g1|TRINITY_DN56764_c0_g2|TRINITY_DN99016_c0_g1|TRINITY_DN66016_c0_g1|TRINITY_DN99481_c0_g1|TRINITY_DN77773_c0_g1|TRINITY_DN64208_c0_g2|TRINITY_DN78524_c1_g1|TRINITY_DN35439_c0_g1|TRINITY_DN73069_c0_g1|TRINITY_DN21915_c0_g1|TRINITY_DN51754_c0_g2|TRINITY_DN76598_c0_g4|TRINITY_DN87033_c0_g3|TRINITY_DN99987_c0_g1|TRINITY_DN50554_c0_g1|TRI…	87	yes
thermotaxis	GO:0043052	1.38634e-10	1.86057e-08	--	53	TRINITY_DN72886_c4_g1|TRINITY_DN61550_c0_g2|TRINITY_DN26128_c0_g1|TRINITY_DN70024_c0_g1|TRINITY_DN31445_c0_g1|TRINITY_DN54738_c0_g1|TRINITY_DN42783_c0_g2|TRINITY_DN91823_c0_g1|TRINITY_DN42783_c0_g1|TRINITY_DN103822_c0_g1|TRINITY_DN80184_c1_g1|TRINITY_DN80184_c0_g1|TRINITY_DN80184_c0_g3|TRINITY_DN80184_c0_g2|TRINITY_DN38128_c0_g1|TRINITY_DN76723_c0_g2|TRINITY_DN72886_c5_g1|TRINITY_DN6960_c0_g1|TRI…	38	TRINITY_DN47546_c0_g4|TRINITY_DN73128_c1_g2	2	TRINITY_DN54738_c0_g1|TRINITY_DN31896_c0_g1|TRINITY_DN31445_c0_g1|TRINITY_DN61550_c0_g2|TRINITY_DN42885_c0_g1|TRINITY_DN72886_c4_g1|TRINITY_DN91823_c0_g1|TRINITY_DN80184_c1_g1|TRINITY_DN75312_c2_g2|TRINITY_DN89227_c0_g1|TRINITY_DN60653_c0_g1|TRINITY_DN70024_c0_g1|TRINITY_DN72886_c5_g1|TRINITY_DN35243_c0_g1|TRINITY_DN26128_c0_g1|TRINITY_DN71909_c3_g6|TRINITY_DN56404_c0_g1|TRINITY_DN72886_c1_g2|TRI…	36	yes
glucan metabolic process	GO:0044042	2.06586e-10	2.737e-08	--	1510	TRINITY_DN71597_c0_g1|TRINITY_DN74045_c2_g1|TRINITY_DN69815_c0_g2|TRINITY_DN69815_c0_g1|TRINITY_DN91085_c0_g1|TRINITY_DN88500_c0_g1|TRINITY_DN71916_c5_g1|TRINITY_DN64048_c0_g1|TRINITY_DN42552_c0_g1|TRINITY_DN29331_c0_g2|TRINITY_DN29331_c0_g1|TRINITY_DN104285_c0_g1|TRINITY_DN100320_c0_g1|TRINITY_DN51537_c0_g1|TRINITY_DN23717_c0_g1|TRINITY_DN18846_c0_g1|TRINITY_DN72931_c0_g1|TRINITY_DN72931_c0_g4|T…	548	TRINITY_DN36713_c0_g1|TRINITY_DN80021_c2_g1|TRINITY_DN80021_c1_g5|TRINITY_DN73551_c2_g4|TRINITY_DN18248_c0_g1|TRINITY_DN72751_c0_g1|TRINITY_DN71233_c0_g2|TRINITY_DN71364_c1_g1|TRINITY_DN89752_c0_g1|TRINITY_DN71233_c0_g1|TRINITY_DN24971_c0_g1|TRINITY_DN77031_c0_g1|TRINITY_DN77031_c0_g2|TRINITY_DN73551_c3_g1|TRINITY_DN85008_c2_g1|TRINITY_DN21098_c0_g1|TRINITY_DN80961_c3_g3|TRINITY_DN94054_c0_g1|TRI…	240	TRINITY_DN80021_c2_g2|TRINITY_DN75583_c1_g9|TRINITY_DN91746_c0_g1|TRINITY_DN34655_c0_g4|TRINITY_DN38415_c0_g1|TRINITY_DN68004_c0_g1|TRINITY_DN91566_c0_g1|TRINITY_DN32093_c0_g1|TRINITY_DN100414_c0_g1|TRINITY_DN67217_c1_g1|TRINITY_DN67217_c1_g2|TRINITY_DN75583_c1_g4|TRINITY_DN67802_c1_g1|TRINITY_DN73136_c0_g1|TRINITY_DN78605_c1_g5|TRINITY_DN75734_c1_g1|TRINITY_DN67254_c0_g1|TRINITY_DN26168_c0_g1|TR…	308	yes
cellular glucan metabolic process	GO:0006073	2.10536e-10	2.75403e-08	--	1504	TRINITY_DN71597_c0_g1|TRINITY_DN74045_c2_g1|TRINITY_DN69815_c0_g2|TRINITY_DN69815_c0_g1|TRINITY_DN91085_c0_g1|TRINITY_DN88500_c0_g1|TRINITY_DN71916_c5_g1|TRINITY_DN55123_c0_g1|TRINITY_DN42552_c0_g1|TRINITY_DN29331_c0_g2|TRINITY_DN29331_c0_g1|TRINITY_DN104285_c0_g1|TRINITY_DN99728_c0_g1|TRINITY_DN51537_c0_g1|TRINITY_DN23717_c0_g1|TRINITY_DN18846_c0_g1|TRINITY_DN72931_c0_g1|TRINITY_DN41680_c0_g1|TR…	546	TRINITY_DN36713_c0_g1|TRINITY_DN80021_c2_g1|TRINITY_DN80021_c1_g5|TRINITY_DN18248_c0_g1|TRINITY_DN72751_c0_g1|TRINITY_DN71233_c0_g2|TRINITY_DN71364_c1_g1|TRINITY_DN89752_c0_g1|TRINITY_DN71233_c0_g1|TRINITY_DN24971_c0_g1|TRINITY_DN77031_c0_g1|TRINITY_DN77031_c0_g2|TRINITY_DN73551_c3_g1|TRINITY_DN85008_c2_g1|TRINITY_DN21098_c0_g1|TRINITY_DN80961_c3_g3|TRINITY_DN94054_c0_g1|TRINITY_DN24753_c0_g1|TRI…	240	TRINITY_DN80021_c2_g2|TRINITY_DN75583_c1_g9|TRINITY_DN91746_c0_g1|TRINITY_DN34655_c0_g4|TRINITY_DN38415_c0_g1|TRINITY_DN68004_c0_g1|TRINITY_DN91566_c0_g1|TRINITY_DN32093_c0_g1|TRINITY_DN100414_c0_g1|TRINITY_DN67217_c1_g1|TRINITY_DN67217_c1_g2|TRINITY_DN75583_c1_g4|TRINITY_DN67802_c1_g1|TRINITY_DN103225_c0_g1|TRINITY_DN78605_c1_g5|TRINITY_DN75734_c1_g1|TRINITY_DN95736_c0_g1|TRINITY_DN26168_c0_g1|T…	306	yes
maturation of LSU-rRNA	GO:0000470	2.69441e-10	3.48051e-08	--	512	TRINITY_DN50197_c0_g4|TRINITY_DN77883_c2_g7|TRINITY_DN86294_c0_g3|TRINITY_DN91608_c0_g1|TRINITY_DN77883_c2_g1|TRINITY_DN50197_c0_g3|TRINITY_DN74020_c1_g6|TRINITY_DN59184_c0_g2|TRINITY_DN74020_c1_g4|TRINITY_DN74020_c1_g5|TRINITY_DN74020_c1_g2|TRINITY_DN74020_c1_g3|TRINITY_DN74020_c1_g1|TRINITY_DN72250_c1_g1|TRINITY_DN41837_c0_g1|TRINITY_DN24833_c0_g1|TRINITY_DN69240_c0_g1|TRINITY_DN31657_c0_g1|TRI…	214	TRINITY_DN79652_c0_g1|TRINITY_DN24833_c0_g1|TRINITY_DN77797_c2_g6|TRINITY_DN61195_c0_g1|TRINITY_DN102531_c0_g1|TRINITY_DN72817_c0_g2|TRINITY_DN93111_c0_g1|TRINITY_DN64032_c0_g2|TRINITY_DN74374_c0_g1|TRINITY_DN70957_c0_g4|TRINITY_DN83258_c0_g4|TRINITY_DN75736_c2_g1|TRINITY_DN74020_c1_g6|TRINITY_DN94202_c0_g1|TRINITY_DN9499_c0_g1|TRINITY_DN93642_c0_g1|TRINITY_DN77883_c2_g7|TRINITY_DN77883_c2_g8|TRI…	86	TRINITY_DN34958_c0_g2|TRINITY_DN34958_c0_g1|TRINITY_DN11413_c0_g1|TRINITY_DN79652_c0_g3|TRINITY_DN79652_c0_g2|TRINITY_DN1571_c0_g1|TRINITY_DN74488_c1_g3|TRINITY_DN72308_c5_g1|TRINITY_DN74488_c1_g1|TRINITY_DN72881_c3_g1|TRINITY_DN63794_c0_g1|TRINITY_DN31657_c0_g1|TRINITY_DN85659_c2_g5|TRINITY_DN74374_c0_g5|TRINITY_DN81988_c4_g4|TRINITY_DN81988_c4_g6|TRINITY_DN74020_c1_g1|TRINITY_DN74020_c1_g2|TRIN…	128	yes
Rac protein signal transduction	GO:0016601	3.39136e-10	4.3267e-08	--	46	TRINITY_DN71699_c3_g3|TRINITY_DN71699_c3_g4|TRINITY_DN45881_c0_g1|TRINITY_DN36426_c0_g1|TRINITY_DN78524_c2_g1|TRINITY_DN78524_c5_g1|TRINITY_DN100905_c0_g1|TRINITY_DN81381_c0_g2|TRINITY_DN82855_c0_g1|TRINITY_DN72027_c5_g1|TRINITY_DN101151_c0_g1|TRINITY_DN72528_c1_g1|TRINITY_DN72528_c2_g1|TRINITY_DN82195_c4_g1|TRINITY_DN82195_c4_g3|TRINITY_DN72027_c9_g2|TRINITY_DN72857_c0_g3|TRINITY_DN72380_c5_g5|T…	34	TRINITY_DN72027_c7_g1|TRINITY_DN72528_c2_g1|TRINITY_DN79772_c0_g1|TRINITY_DN77834_c5_g3|TRINITY_DN72027_c9_g2|TRINITY_DN72857_c0_g3|TRINITY_DN72380_c5_g2|TRINITY_DN94647_c0_g1	8	TRINITY_DN56233_c0_g1|TRINITY_DN91985_c0_g1|TRINITY_DN78524_c2_g1|TRINITY_DN101151_c0_g1|TRINITY_DN72027_c5_g1|TRINITY_DN24043_c0_g1|TRINITY_DN72380_c5_g1|TRINITY_DN72380_c5_g6|TRINITY_DN72380_c5_g5|TRINITY_DN78524_c5_g1|TRINITY_DN81381_c0_g2|TRINITY_DN71699_c5_g3|TRINITY_DN71699_c5_g2|TRINITY_DN45881_c0_g1|TRINITY_DN72528_c1_g1|TRINITY_DN82195_c4_g3|TRINITY_DN82195_c4_g1|TRINITY_DN103037_c0_g1|T…	26	yes
response to organophosphorus	GO:0046683	3.51385e-10	4.42831e-08	--	143	TRINITY_DN42783_c0_g2|TRINITY_DN84156_c3_g9|TRINITY_DN80128_c0_g1|TRINITY_DN83047_c4_g1|TRINITY_DN72810_c1_g1|TRINITY_DN38128_c0_g1|TRINITY_DN26128_c0_g1|TRINITY_DN76584_c0_g7|TRINITY_DN67353_c0_g3|TRINITY_DN80184_c1_g1|TRINITY_DN83831_c3_g1|TRINITY_DN67105_c0_g3|TRINITY_DN54738_c0_g1|TRINITY_DN76584_c0_g3|TRINITY_DN71909_c1_g1|TRINITY_DN31445_c0_g1|TRINITY_DN67619_c0_g2|TRINITY_DN91823_c0_g1|TRI…	77	TRINITY_DN62729_c0_g2|TRINITY_DN84156_c3_g9|TRINITY_DN77077_c3_g2|TRINITY_DN80128_c0_g1|TRINITY_DN52972_c0_g2|TRINITY_DN75439_c4_g8|TRINITY_DN56726_c1_g2|TRINITY_DN67105_c0_g3|TRINITY_DN44444_c0_g2|TRINITY_DN48581_c0_g1	10	TRINITY_DN54738_c0_g1|TRINITY_DN31896_c0_g2|TRINITY_DN1303_c0_g1|TRINITY_DN31445_c0_g1|TRINITY_DN61550_c0_g2|TRINITY_DN75342_c4_g3|TRINITY_DN82962_c0_g1|TRINITY_DN78989_c6_g1|TRINITY_DN86055_c0_g1|TRINITY_DN42885_c0_g1|TRINITY_DN56404_c0_g1|TRINITY_DN71909_c1_g1|TRINITY_DN91823_c0_g1|TRINITY_DN80184_c1_g1|TRINITY_DN75312_c2_g2|TRINITY_DN68277_c0_g1|TRINITY_DN75524_c3_g1|TRINITY_DN89227_c0_g1|TRIN…	67	yes
actin filament bundle assembly	GO:0051017	8.89491e-10	1.10747e-07	GO:0045011	235	TRINITY_DN61395_c0_g1|TRINITY_DN78745_c1_g3|TRINITY_DN79430_c1_g6|TRINITY_DN79430_c1_g4|TRINITY_DN79430_c1_g5|TRINITY_DN79219_c3_g1|TRINITY_DN79430_c1_g9|TRINITY_DN85396_c0_g1|TRINITY_DN43287_c0_g1|TRINITY_DN85396_c0_g2|TRINITY_DN76241_c1_g2|TRINITY_DN75771_c4_g2|TRINITY_DN75771_c4_g1|TRINITY_DN76785_c3_g1|TRINITY_DN74523_c0_g10|TRINITY_DN70069_c0_g5|TRINITY_DN62503_c0_g1|TRINITY_DN70069_c0_g2|TR…	112	TRINITY_DN79430_c1_g4|TRINITY_DN73441_c3_g5|TRINITY_DN79430_c1_g6|TRINITY_DN79219_c2_g1|TRINITY_DN72406_c2_g2|TRINITY_DN72406_c2_g7|TRINITY_DN33884_c0_g1|TRINITY_DN78286_c3_g4|TRINITY_DN57035_c0_g1|TRINITY_DN77299_c1_g4|TRINITY_DN36207_c0_g1|TRINITY_DN59128_c0_g2|TRINITY_DN52880_c0_g1|TRINITY_DN71470_c0_g1|TRINITY_DN60212_c0_g1|TRINITY_DN72614_c0_g7|TRINITY_DN44821_c0_g4|TRINITY_DN72614_c0_g8|TRI…	30	TRINITY_DN60166_c0_g1|TRINITY_DN87267_c3_g6|TRINITY_DN79430_c1_g5|TRINITY_DN100952_c0_g1|TRINITY_DN79430_c1_g9|TRINITY_DN45443_c0_g1|TRINITY_DN78286_c2_g1|TRINITY_DN87261_c1_g1|TRINITY_DN36985_c0_g1|TRINITY_DN48909_c0_g2|TRINITY_DN72528_c1_g4|TRINITY_DN43287_c0_g1|TRINITY_DN75771_c4_g1|TRINITY_DN34485_c0_g2|TRINITY_DN75771_c4_g2|TRINITY_DN103120_c0_g1|TRINITY_DN51623_c0_g2|TRINITY_DN79513_c1_g1|T…	82	yes
small GTPase mediated signal transduction	GO:0007264	1.06912e-09	1.31527e-07	--	797	TRINITY_DN81686_c3_g6|TRINITY_DN14016_c0_g1|TRINITY_DN71699_c3_g3|TRINITY_DN13161_c0_g1|TRINITY_DN81686_c3_g2|TRINITY_DN71699_c3_g4|TRINITY_DN75064_c3_g1|TRINITY_DN81686_c3_g1|TRINITY_DN67781_c0_g1|TRINITY_DN75064_c5_g5|TRINITY_DN74757_c2_g4|TRINITY_DN13306_c0_g1|TRINITY_DN82721_c3_g9|TRINITY_DN72913_c6_g5|TRINITY_DN54914_c0_g3|TRINITY_DN75279_c4_g2|TRINITY_DN71699_c3_g2|TRINITY_DN24159_c0_g1|TRI…	309	TRINITY_DN76540_c1_g1|TRINITY_DN74187_c4_g2|TRINITY_DN77834_c4_g2|TRINITY_DN75909_c5_g1|TRINITY_DN87739_c0_g1|TRINITY_DN72027_c9_g2|TRINITY_DN77347_c0_g1|TRINITY_DN67487_c0_g1|TRINITY_DN67951_c0_g2|TRINITY_DN65798_c0_g1|TRINITY_DN62247_c0_g1|TRINITY_DN74610_c2_g2|TRINITY_DN67781_c0_g1|TRINITY_DN85863_c4_g1|TRINITY_DN82949_c1_g1|TRINITY_DN98667_c0_g1|TRINITY_DN72027_c7_g1|TRINITY_DN79772_c0_g1|TRI…	91	TRINITY_DN56233_c0_g1|TRINITY_DN91985_c0_g1|TRINITY_DN76193_c3_g1|TRINITY_DN74424_c0_g1|TRINITY_DN76078_c0_g1|TRINITY_DN75279_c4_g1|TRINITY_DN74187_c4_g3|TRINITY_DN80765_c2_g4|TRINITY_DN20587_c0_g1|TRINITY_DN99764_c0_g1|TRINITY_DN72027_c6_g1|TRINITY_DN72027_c6_g3|TRINITY_DN75909_c5_g4|TRINITY_DN75064_c3_g1|TRINITY_DN74173_c4_g4|TRINITY_DN75909_c5_g3|TRINITY_DN75064_c3_g2|TRINITY_DN75719_c4_g3|TRI…	218	yes
response to purine-containing compound	GO:0014074	2.03714e-09	2.47668e-07	--	175	TRINITY_DN34439_c0_g1|TRINITY_DN38128_c0_g1|TRINITY_DN78989_c6_g1|TRINITY_DN67768_c0_g1|TRINITY_DN82962_c0_g1|TRINITY_DN76723_c0_g2|TRINITY_DN70069_c0_g5|TRINITY_DN70069_c0_g2|TRINITY_DN70069_c0_g3|TRINITY_DN75342_c4_g3|TRINITY_DN3675_c0_g1|TRINITY_DN67105_c0_g3|TRINITY_DN67457_c0_g3|TRINITY_DN84156_c3_g9|TRINITY_DN83047_c4_g1|TRINITY_DN91823_c0_g1|TRINITY_DN1303_c0_g1|TRINITY_DN80184_c1_g1|TRINI…	88	TRINITY_DN32864_c0_g1|TRINITY_DN44444_c0_g2|TRINITY_DN84156_c3_g9|TRINITY_DN77077_c3_g2|TRINITY_DN75181_c4_g1|TRINITY_DN75439_c4_g8|TRINITY_DN80481_c0_g1|TRINITY_DN62794_c0_g1|TRINITY_DN80128_c0_g1|TRINITY_DN52972_c0_g2|TRINITY_DN81362_c0_g4|TRINITY_DN56726_c1_g2|TRINITY_DN67105_c0_g3|TRINITY_DN48581_c0_g1|TRINITY_DN67768_c0_g1|TRINITY_DN71764_c0_g1	16	TRINITY_DN33826_c0_g1|TRINITY_DN54738_c0_g1|TRINITY_DN1303_c0_g1|TRINITY_DN31445_c0_g1|TRINITY_DN61550_c0_g2|TRINITY_DN104520_c0_g1|TRINITY_DN77865_c4_g1|TRINITY_DN82962_c0_g1|TRINITY_DN6679_c0_g1|TRINITY_DN86055_c0_g1|TRINITY_DN42885_c0_g1|TRINITY_DN79520_c6_g2|TRINITY_DN34439_c0_g1|TRINITY_DN68277_c0_g1|TRINITY_DN91823_c0_g1|TRINITY_DN80184_c1_g1|TRINITY_DN31896_c0_g1|TRINITY_DN39199_c0_g1|TRIN…	72	yes
purine ribonucleoside triphosphate biosynthetic process	GO:0009206	2.32003e-09	2.75576e-07	--	823	TRINITY_DN75569_c2_g4|TRINITY_DN75774_c2_g1|TRINITY_DN75774_c2_g3|TRINITY_DN86407_c2_g2|TRINITY_DN75569_c2_g3|TRINITY_DN102708_c0_g1|TRINITY_DN72781_c4_g1|TRINITY_DN73563_c1_g1|TRINITY_DN77166_c4_g1|TRINITY_DN8938_c0_g1|TRINITY_DN77068_c2_g9|TRINITY_DN76319_c2_g1|TRINITY_DN62820_c0_g1|TRINITY_DN77068_c2_g3|TRINITY_DN77068_c2_g1|TRINITY_DN79110_c1_g1|TRINITY_DN98413_c0_g1|TRINITY_DN78287_c1_g2|TRI…	316	TRINITY_DN21715_c0_g1|TRINITY_DN45144_c0_g1|TRINITY_DN68640_c0_g1|TRINITY_DN84775_c0_g4|TRINITY_DN72791_c0_g1|TRINITY_DN77392_c1_g3|TRINITY_DN81538_c1_g6|TRINITY_DN81538_c1_g7|TRINITY_DN81538_c1_g8|TRINITY_DN62951_c0_g1|TRINITY_DN44953_c0_g1|TRINITY_DN77495_c0_g3|TRINITY_DN85860_c1_g3|TRINITY_DN87144_c1_g2|TRINITY_DN101849_c0_g1|TRINITY_DN76407_c3_g1|TRINITY_DN86879_c1_g8|TRINITY_DN78521_c1_g2|TR…	109	TRINITY_DN72781_c4_g3|TRINITY_DN87193_c0_g1|TRINITY_DN72781_c4_g2|TRINITY_DN52257_c0_g2|TRINITY_DN53029_c0_g1|TRINITY_DN62820_c0_g1|TRINITY_DN84775_c0_g6|TRINITY_DN77392_c1_g5|TRINITY_DN76526_c0_g1|TRINITY_DN77392_c1_g1|TRINITY_DN87678_c0_g1|TRINITY_DN85268_c1_g9|TRINITY_DN89730_c0_g1|TRINITY_DN76381_c2_g4|TRINITY_DN76381_c2_g3|TRINITY_DN87483_c1_g1|TRINITY_DN75643_c2_g1|TRINITY_DN22726_c0_g1|TRI…	207	yes
purine nucleoside triphosphate biosynthetic process	GO:0009145	2.32003e-09	2.75576e-07	--	823	TRINITY_DN75569_c2_g4|TRINITY_DN75774_c2_g1|TRINITY_DN75774_c2_g3|TRINITY_DN86407_c2_g2|TRINITY_DN75569_c2_g3|TRINITY_DN102708_c0_g1|TRINITY_DN72781_c4_g1|TRINITY_DN73563_c1_g1|TRINITY_DN77166_c4_g1|TRINITY_DN8938_c0_g1|TRINITY_DN77068_c2_g9|TRINITY_DN76319_c2_g1|TRINITY_DN62820_c0_g1|TRINITY_DN77068_c2_g3|TRINITY_DN77068_c2_g1|TRINITY_DN79110_c1_g1|TRINITY_DN79595_c0_g2|TRINITY_DN78287_c1_g2|TRI…	316	TRINITY_DN21715_c0_g1|TRINITY_DN45144_c0_g1|TRINITY_DN68640_c0_g1|TRINITY_DN84775_c0_g4|TRINITY_DN72791_c0_g1|TRINITY_DN77392_c1_g3|TRINITY_DN81538_c1_g6|TRINITY_DN81538_c1_g7|TRINITY_DN81538_c1_g8|TRINITY_DN62951_c0_g1|TRINITY_DN44953_c0_g1|TRINITY_DN77495_c0_g3|TRINITY_DN85860_c1_g3|TRINITY_DN87144_c1_g2|TRINITY_DN101849_c0_g1|TRINITY_DN76407_c3_g1|TRINITY_DN86879_c1_g8|TRINITY_DN78521_c1_g2|TR…	109	TRINITY_DN72781_c4_g3|TRINITY_DN87193_c0_g1|TRINITY_DN72781_c4_g2|TRINITY_DN52257_c0_g2|TRINITY_DN53029_c0_g1|TRINITY_DN62820_c0_g1|TRINITY_DN84775_c0_g6|TRINITY_DN77392_c1_g5|TRINITY_DN76526_c0_g1|TRINITY_DN77392_c1_g1|TRINITY_DN87678_c0_g1|TRINITY_DN85268_c1_g9|TRINITY_DN89730_c0_g1|TRINITY_DN76381_c2_g4|TRINITY_DN76381_c2_g3|TRINITY_DN87483_c1_g1|TRINITY_DN75643_c2_g1|TRINITY_DN22726_c0_g1|TRI…	207	yes
regulation of cGMP biosynthetic process	GO:0030826	4.16262e-09	4.88824e-07	--	55	TRINITY_DN70748_c4_g8|TRINITY_DN72810_c1_g1|TRINITY_DN8825_c0_g1|TRINITY_DN53424_c0_g1|TRINITY_DN102451_c0_g1|TRINITY_DN6382_c0_g1|TRINITY_DN63515_c0_g1|TRINITY_DN63515_c0_g2|TRINITY_DN63515_c0_g3|TRINITY_DN50403_c0_g1|TRINITY_DN31501_c0_g1|TRINITY_DN88477_c0_g1|TRINITY_DN56897_c0_g1|TRINITY_DN56087_c0_g1|TRINITY_DN99457_c0_g1|TRINITY_DN66350_c0_g1|TRINITY_DN5148_c0_g1|TRINITY_DN72886_c1_g1|TRINI…	37	TRINITY_DN39913_c0_g2|TRINITY_DN50403_c0_g1|TRINITY_DN102451_c0_g1|TRINITY_DN63515_c0_g2|TRINITY_DN63515_c0_g1|TRINITY_DN77829_c0_g1|TRINITY_DN72054_c4_g7	7	TRINITY_DN56897_c0_g1|TRINITY_DN6382_c0_g1|TRINITY_DN5714_c0_g1|TRINITY_DN62309_c0_g3|TRINITY_DN67221_c0_g2|TRINITY_DN67221_c0_g3|TRINITY_DN104080_c0_g1|TRINITY_DN89636_c0_g1|TRINITY_DN73069_c0_g1|TRINITY_DN88477_c0_g1|TRINITY_DN70748_c4_g1|TRINITY_DN70748_c4_g6|TRINITY_DN70748_c4_g4|TRINITY_DN70748_c4_g5|TRINITY_DN77829_c0_g3|TRINITY_DN70748_c4_g8|TRINITY_DN31501_c0_g1|TRINITY_DN53424_c0_g1|TRIN…	30	yes
regulation of sorocarp development	GO:0031156	4.90462e-09	5.69487e-07	--	98	TRINITY_DN63515_c0_g3|TRINITY_DN59951_c0_g1|TRINITY_DN8825_c0_g1|TRINITY_DN53424_c0_g1|TRINITY_DN47536_c0_g2|TRINITY_DN19864_c0_g2|TRINITY_DN6382_c0_g1|TRINITY_DN40910_c0_g1|TRINITY_DN55882_c0_g1|TRINITY_DN63515_c0_g1|TRINITY_DN63515_c0_g2|TRINITY_DN80720_c0_g2|TRINITY_DN58245_c0_g1|TRINITY_DN50403_c0_g1|TRINITY_DN44250_c0_g2|TRINITY_DN79772_c2_g2|TRINITY_DN56897_c0_g1|TRINITY_DN105168_c0_g1|TRIN…	56	TRINITY_DN73817_c0_g1|TRINITY_DN47536_c0_g2|TRINITY_DN50403_c0_g1|TRINITY_DN63515_c0_g2|TRINITY_DN70895_c0_g1|TRINITY_DN63515_c0_g1|TRINITY_DN77829_c0_g1	7	TRINITY_DN40316_c0_g1|TRINITY_DN56897_c0_g1|TRINITY_DN95872_c0_g1|TRINITY_DN6382_c0_g1|TRINITY_DN59951_c0_g1|TRINITY_DN50354_c0_g2|TRINITY_DN38291_c0_g2|TRINITY_DN13496_c0_g2|TRINITY_DN67221_c0_g2|TRINITY_DN105168_c0_g1|TRINITY_DN58245_c0_g1|TRINITY_DN104080_c0_g1|TRINITY_DN71414_c2_g17|TRINITY_DN67221_c0_g3|TRINITY_DN56138_c0_g2|TRINITY_DN76598_c0_g15|TRINITY_DN40910_c0_g1|TRINITY_DN88477_c0_g1|…	49	yes
plasma membrane invagination	GO:0099024	7.14388e-09	8.11262e-07	--	87	TRINITY_DN25022_c0_g1|TRINITY_DN65740_c0_g1|TRINITY_DN69940_c2_g2|TRINITY_DN74492_c2_g1|TRINITY_DN74492_c2_g2|TRINITY_DN69940_c2_g1|TRINITY_DN74127_c4_g3|TRINITY_DN74127_c4_g1|TRINITY_DN61783_c0_g1|TRINITY_DN65740_c2_g2|TRINITY_DN82383_c6_g6|TRINITY_DN44909_c0_g1|TRINITY_DN82383_c6_g8|TRINITY_DN82135_c5_g4|TRINITY_DN46511_c0_g2|TRINITY_DN9049_c0_g1|TRINITY_DN61783_c0_g3|TRINITY_DN103816_c0_g1|TRI…	51	TRINITY_DN71399_c2_g8|TRINITY_DN80414_c0_g4|TRINITY_DN74584_c2_g2|TRINITY_DN65740_c0_g1|TRINITY_DN74584_c2_g5|TRINITY_DN65740_c2_g1|TRINITY_DN75006_c3_g5|TRINITY_DN69940_c2_g1|TRINITY_DN69940_c2_g2|TRINITY_DN75006_c3_g1|TRINITY_DN73205_c0_g1	11	TRINITY_DN61783_c0_g3|TRINITY_DN61783_c0_g1|TRINITY_DN69940_c0_g1|TRINITY_DN99481_c0_g1|TRINITY_DN25022_c0_g1|TRINITY_DN56764_c0_g1|TRINITY_DN56764_c0_g2|TRINITY_DN35397_c0_g2|TRINITY_DN82383_c6_g6|TRINITY_DN46511_c0_g2|TRINITY_DN82383_c6_g8|TRINITY_DN79038_c2_g1|TRINITY_DN74492_c2_g2|TRINITY_DN15023_c0_g1|TRINITY_DN62950_c0_g1|TRINITY_DN74584_c2_g4|TRINITY_DN65740_c2_g2|TRINITY_DN74492_c2_g1|TRI…	40	yes
regulation of aggregation involved in sorocarp development	GO:0060176	7.09419e-09	8.11262e-07	--	60	TRINITY_DN59951_c0_g1|TRINITY_DN8825_c0_g1|TRINITY_DN53424_c0_g1|TRINITY_DN47536_c0_g2|TRINITY_DN19864_c0_g2|TRINITY_DN6382_c0_g1|TRINITY_DN55882_c0_g1|TRINITY_DN63707_c0_g3|TRINITY_DN63515_c0_g1|TRINITY_DN63515_c0_g2|TRINITY_DN63515_c0_g3|TRINITY_DN58245_c0_g1|TRINITY_DN50403_c0_g1|TRINITY_DN56087_c0_g1|TRINITY_DN79772_c2_g2|TRINITY_DN56897_c0_g1|TRINITY_DN31501_c0_g1|TRINITY_DN94129_c0_g1|TRINI…	39	TRINITY_DN73817_c0_g1|TRINITY_DN47536_c0_g2|TRINITY_DN50403_c0_g1|TRINITY_DN63515_c0_g2|TRINITY_DN63515_c0_g1|TRINITY_DN77829_c0_g1	6	TRINITY_DN40316_c0_g1|TRINITY_DN56897_c0_g1|TRINITY_DN95872_c0_g1|TRINITY_DN6382_c0_g1|TRINITY_DN59951_c0_g1|TRINITY_DN71050_c0_g2|TRINITY_DN13496_c0_g2|TRINITY_DN67221_c0_g2|TRINITY_DN67221_c0_g3|TRINITY_DN58245_c0_g1|TRINITY_DN104080_c0_g1|TRINITY_DN77389_c3_g1|TRINITY_DN56138_c0_g2|TRINITY_DN76598_c0_g15|TRINITY_DN88477_c0_g1|TRINITY_DN77829_c0_g3|TRINITY_DN76598_c0_g4|TRINITY_DN31501_c0_g1|TR…	33	yes
regulation of aggregate size involved in sorocarp development	GO:0031157	8.84222e-09	9.93211e-07	--	56	TRINITY_DN59951_c0_g1|TRINITY_DN8825_c0_g1|TRINITY_DN53424_c0_g1|TRINITY_DN47536_c0_g2|TRINITY_DN19864_c0_g2|TRINITY_DN6382_c0_g1|TRINITY_DN63515_c0_g1|TRINITY_DN63707_c0_g3|TRINITY_DN55882_c0_g1|TRINITY_DN63515_c0_g2|TRINITY_DN63515_c0_g3|TRINITY_DN50403_c0_g1|TRINITY_DN56087_c0_g1|TRINITY_DN79772_c2_g2|TRINITY_DN56897_c0_g1|TRINITY_DN31501_c0_g1|TRINITY_DN94129_c0_g1|TRINITY_DN99457_c0_g1|TRINI…	37	TRINITY_DN73817_c0_g1|TRINITY_DN47536_c0_g2|TRINITY_DN50403_c0_g1|TRINITY_DN63515_c0_g2|TRINITY_DN63515_c0_g1|TRINITY_DN77829_c0_g1	6	TRINITY_DN40316_c0_g1|TRINITY_DN56897_c0_g1|TRINITY_DN95872_c0_g1|TRINITY_DN6382_c0_g1|TRINITY_DN59951_c0_g1|TRINITY_DN71050_c0_g2|TRINITY_DN13496_c0_g2|TRINITY_DN67221_c0_g2|TRINITY_DN67221_c0_g3|TRINITY_DN104080_c0_g1|TRINITY_DN77389_c3_g1|TRINITY_DN56138_c0_g2|TRINITY_DN76598_c0_g15|TRINITY_DN88477_c0_g1|TRINITY_DN77829_c0_g3|TRINITY_DN76598_c0_g4|TRINITY_DN31501_c0_g1|TRINITY_DN19864_c0_g2|TR…	31	yes
actin filament bundle organization	GO:0061572	9.55822e-09	1.06209e-06	--	243	TRINITY_DN78745_c1_g3|TRINITY_DN61395_c0_g1|TRINITY_DN79430_c1_g6|TRINITY_DN72406_c0_g1|TRINITY_DN79430_c1_g5|TRINITY_DN79219_c3_g1|TRINITY_DN79430_c1_g9|TRINITY_DN85396_c0_g1|TRINITY_DN43287_c0_g1|TRINITY_DN85396_c0_g2|TRINITY_DN76241_c1_g2|TRINITY_DN75771_c4_g2|TRINITY_DN75771_c4_g1|TRINITY_DN76785_c3_g1|TRINITY_DN74523_c0_g10|TRINITY_DN70069_c0_g5|TRINITY_DN62503_c0_g1|TRINITY_DN70069_c0_g2|TR…	112	TRINITY_DN79430_c1_g4|TRINITY_DN73441_c3_g5|TRINITY_DN79430_c1_g6|TRINITY_DN79219_c2_g1|TRINITY_DN72406_c2_g2|TRINITY_DN72406_c2_g7|TRINITY_DN33884_c0_g1|TRINITY_DN78286_c3_g4|TRINITY_DN57035_c0_g1|TRINITY_DN77299_c1_g4|TRINITY_DN36207_c0_g1|TRINITY_DN59128_c0_g2|TRINITY_DN52880_c0_g1|TRINITY_DN71470_c0_g1|TRINITY_DN60212_c0_g1|TRINITY_DN72614_c0_g7|TRINITY_DN44821_c0_g4|TRINITY_DN72614_c0_g8|TRI…	30	TRINITY_DN60166_c0_g1|TRINITY_DN87267_c3_g6|TRINITY_DN79430_c1_g5|TRINITY_DN100952_c0_g1|TRINITY_DN79430_c1_g9|TRINITY_DN45443_c0_g1|TRINITY_DN78286_c2_g1|TRINITY_DN87261_c1_g1|TRINITY_DN36985_c0_g1|TRINITY_DN48909_c0_g2|TRINITY_DN72528_c1_g4|TRINITY_DN43287_c0_g1|TRINITY_DN75771_c4_g1|TRINITY_DN34485_c0_g2|TRINITY_DN75771_c4_g2|TRINITY_DN103120_c0_g1|TRINITY_DN51623_c0_g2|TRINITY_DN79513_c1_g1|T…	82	yes
pinocytosis	GO:0006907	9.78706e-09	1.07595e-06	GO:0006908|GO:1902536	97	TRINITY_DN60942_c0_g1|TRINITY_DN61140_c0_g1|TRINITY_DN61140_c0_g2|TRINITY_DN64371_c0_g1|TRINITY_DN72810_c1_g1|TRINITY_DN87033_c2_g5|TRINITY_DN9730_c0_g1|TRINITY_DN104953_c0_g1|TRINITY_DN55882_c0_g1|TRINITY_DN66821_c0_g2|TRINITY_DN16431_c0_g1|TRINITY_DN66821_c0_g1|TRINITY_DN56409_c0_g1|TRINITY_DN61783_c0_g1|TRINITY_DN73441_c3_g7|TRINITY_DN27128_c0_g1|TRINITY_DN38464_c0_g1|TRINITY_DN35397_c0_g2|TRI…	55	TRINITY_DN16513_c0_g1|TRINITY_DN73441_c3_g7|TRINITY_DN16431_c0_g1|TRINITY_DN9730_c0_g1|TRINITY_DN104953_c0_g1|TRINITY_DN38464_c0_g2|TRINITY_DN38464_c0_g1	7	TRINITY_DN61783_c0_g3|TRINITY_DN61783_c0_g1|TRINITY_DN66224_c0_g2|TRINITY_DN40316_c0_g1|TRINITY_DN95019_c0_g1|TRINITY_DN35397_c0_g2|TRINITY_DN18960_c0_g1|TRINITY_DN12946_c0_g1|TRINITY_DN76598_c0_g15|TRINITY_DN88276_c0_g1|TRINITY_DN48875_c0_g1|TRINITY_DN23737_c0_g1|TRINITY_DN55882_c0_g1|TRINITY_DN66224_c1_g1|TRINITY_DN103492_c0_g1|TRINITY_DN87815_c0_g1|TRINITY_DN22815_c0_g1|TRINITY_DN22815_c0_g2|T…	48	yes
membrane invagination	GO:0010324	1.01968e-08	1.10919e-06	GO:1902534	90	TRINITY_DN25022_c0_g1|TRINITY_DN65740_c0_g1|TRINITY_DN69940_c2_g2|TRINITY_DN74492_c2_g1|TRINITY_DN74492_c2_g2|TRINITY_DN69940_c2_g1|TRINITY_DN74127_c4_g3|TRINITY_DN74127_c4_g1|TRINITY_DN61783_c0_g1|TRINITY_DN74584_c2_g2|TRINITY_DN82383_c6_g6|TRINITY_DN44909_c0_g1|TRINITY_DN82383_c6_g8|TRINITY_DN82135_c5_g4|TRINITY_DN46511_c0_g2|TRINITY_DN9049_c0_g1|TRINITY_DN61783_c0_g3|TRINITY_DN103816_c0_g1|TRI…	52	TRINITY_DN71399_c2_g8|TRINITY_DN80414_c0_g4|TRINITY_DN74584_c2_g2|TRINITY_DN65740_c0_g1|TRINITY_DN74584_c2_g5|TRINITY_DN65740_c2_g1|TRINITY_DN75006_c3_g5|TRINITY_DN69940_c2_g1|TRINITY_DN69940_c2_g2|TRINITY_DN75006_c3_g1|TRINITY_DN73205_c0_g1	11	TRINITY_DN61783_c0_g3|TRINITY_DN61783_c0_g1|TRINITY_DN69940_c0_g1|TRINITY_DN99481_c0_g1|TRINITY_DN25022_c0_g1|TRINITY_DN56764_c0_g1|TRINITY_DN56764_c0_g2|TRINITY_DN35397_c0_g2|TRINITY_DN82383_c6_g6|TRINITY_DN46511_c0_g2|TRINITY_DN82383_c6_g8|TRINITY_DN79038_c2_g1|TRINITY_DN74492_c2_g2|TRINITY_DN15023_c0_g1|TRINITY_DN62950_c0_g1|TRINITY_DN74584_c2_g4|TRINITY_DN65740_c2_g2|TRINITY_DN74492_c2_g1|TRI…	41	yes
purine ribonucleoside triphosphate metabolic process	GO:0009205	1.16863e-08	1.25798e-06	--	1676	TRINITY_DN75569_c2_g4|TRINITY_DN75569_c2_g3|TRINITY_DN33655_c0_g1|TRINITY_DN3189_c0_g1|TRINITY_DN79110_c1_g1|TRINITY_DN77566_c0_g2|TRINITY_DN50613_c0_g1|TRINITY_DN83692_c1_g1|TRINITY_DN74026_c0_g2|TRINITY_DN83692_c1_g3|TRINITY_DN95504_c0_g1|TRINITY_DN83692_c1_g6|TRINITY_DN79605_c2_g1|TRINITY_DN76766_c2_g5|TRINITY_DN79605_c2_g2|TRINITY_DN79605_c2_g5|TRINITY_DN79605_c2_g4|TRINITY_DN74324_c3_g1|TRIN…	589	TRINITY_DN75725_c1_g2|TRINITY_DN75725_c1_g5|TRINITY_DN45144_c0_g1|TRINITY_DN96034_c0_g1|TRINITY_DN68640_c0_g1|TRINITY_DN21715_c0_g1|TRINITY_DN84775_c0_g4|TRINITY_DN78623_c1_g1|TRINITY_DN72791_c0_g1|TRINITY_DN75282_c6_g4|TRINITY_DN77392_c1_g3|TRINITY_DN75725_c1_g4|TRINITY_DN81538_c1_g6|TRINITY_DN83436_c0_g1|TRINITY_DN73154_c0_g1|TRINITY_DN83436_c0_g5|TRINITY_DN77330_c1_g7|TRINITY_DN65561_c0_g2|TRI…	206	TRINITY_DN53029_c0_g1|TRINITY_DN77392_c1_g5|TRINITY_DN15161_c0_g1|TRINITY_DN77392_c1_g1|TRINITY_DN89730_c0_g1|TRINITY_DN50613_c0_g1|TRINITY_DN75643_c2_g1|TRINITY_DN60953_c0_g1|TRINITY_DN7996_c0_g2|TRINITY_DN54363_c0_g1|TRINITY_DN77788_c5_g2|TRINITY_DN103074_c0_g1|TRINITY_DN85268_c1_g3|TRINITY_DN76403_c1_g13|TRINITY_DN77495_c0_g7|TRINITY_DN85268_c1_g4|TRINITY_DN85268_c1_g5|TRINITY_DN89621_c0_g1|TR…	383	yes
actin filament depolymerization	GO:0030042	1.21081e-08	1.28995e-06	--	162	TRINITY_DN52741_c0_g1|TRINITY_DN90001_c0_g1|TRINITY_DN76267_c0_g1|TRINITY_DN69940_c2_g2|TRINITY_DN52065_c0_g2|TRINITY_DN69940_c2_g1|TRINITY_DN73982_c0_g1|TRINITY_DN74757_c2_g4|TRINITY_DN73982_c0_g2|TRINITY_DN93968_c0_g1|TRINITY_DN73982_c0_g4|TRINITY_DN65740_c2_g1|TRINITY_DN66065_c0_g3|TRINITY_DN63494_c2_g1|TRINITY_DN65740_c2_g2|TRINITY_DN80056_c1_g1|TRINITY_DN104087_c0_g1|TRINITY_DN44909_c0_g1|TR…	81	TRINITY_DN72937_c1_g6|TRINITY_DN72937_c1_g4|TRINITY_DN34254_c0_g1|TRINITY_DN103590_c0_g1|TRINITY_DN64715_c0_g3|TRINITY_DN100422_c0_g1|TRINITY_DN74757_c2_g4|TRINITY_DN65740_c0_g1|TRINITY_DN58276_c0_g1|TRINITY_DN65740_c2_g1|TRINITY_DN69940_c2_g1|TRINITY_DN69940_c2_g2|TRINITY_DN93952_c0_g1|TRINITY_DN66065_c0_g3|TRINITY_DN17058_c0_g1|TRINITY_DN34688_c0_g1|TRINITY_DN73982_c0_g2|TRINITY_DN73982_c0_g1|T…	23	TRINITY_DN61783_c0_g3|TRINITY_DN61783_c0_g1|TRINITY_DN69940_c0_g1|TRINITY_DN99481_c0_g1|TRINITY_DN93968_c0_g1|TRINITY_DN56764_c0_g1|TRINITY_DN56764_c0_g2|TRINITY_DN44909_c0_g1|TRINITY_DN99113_c0_g1|TRINITY_DN72937_c1_g2|TRINITY_DN38445_c0_g1|TRINITY_DN59070_c0_g1|TRINITY_DN27955_c0_g2|TRINITY_DN27955_c0_g1|TRINITY_DN76267_c0_g1|TRINITY_DN37341_c0_g1|TRINITY_DN47665_c0_g2|TRINITY_DN63494_c0_g2|TRI…	58	yes
cytoskeleton organization	GO:0007010	1.28253e-08	1.35241e-06	--	1455	TRINITY_DN28213_c0_g1|TRINITY_DN71922_c0_g3|TRINITY_DN67781_c0_g1|TRINITY_DN56082_c0_g1|TRINITY_DN75006_c3_g5|TRINITY_DN29555_c0_g1|TRINITY_DN83217_c1_g2|TRINITY_DN43287_c0_g1|TRINITY_DN71652_c1_g1|TRINITY_DN42382_c0_g1|TRINITY_DN42445_c0_g2|TRINITY_DN91758_c0_g1|TRINITY_DN82195_c4_g1|TRINITY_DN82195_c4_g3|TRINITY_DN41933_c0_g2|TRINITY_DN67348_c0_g1|TRINITY_DN80121_c4_g1|TRINITY_DN12946_c0_g1|TRI…	518	TRINITY_DN90107_c0_g1|TRINITY_DN73441_c3_g5|TRINITY_DN71948_c0_g1|TRINITY_DN60895_c0_g3|TRINITY_DN77834_c4_g2|TRINITY_DN65211_c0_g2|TRINITY_DN64830_c0_g2|TRINITY_DN70253_c4_g7|TRINITY_DN73131_c1_g1|TRINITY_DN87739_c0_g1|TRINITY_DN63267_c0_g1|TRINITY_DN76820_c1_g2|TRINITY_DN72027_c9_g2|TRINITY_DN50341_c0_g1|TRINITY_DN65798_c0_g1|TRINITY_DN77122_c0_g1|TRINITY_DN74139_c0_g1|TRINITY_DN62247_c0_g1|TRI…	166	TRINITY_DN80183_c0_g2|TRINITY_DN73308_c2_g2|TRINITY_DN103492_c0_g1|TRINITY_DN66224_c0_g2|TRINITY_DN81831_c0_g1|TRINITY_DN81831_c0_g2|TRINITY_DN15023_c0_g1|TRINITY_DN85803_c0_g5|TRINITY_DN73069_c0_g1|TRINITY_DN46382_c0_g2|TRINITY_DN35431_c0_g1|TRINITY_DN72380_c2_g1|TRINITY_DN20587_c0_g1|TRINITY_DN45484_c0_g1|TRINITY_DN104732_c0_g1|TRINITY_DN20343_c0_g2|TRINITY_DN80765_c1_g1|TRINITY_DN31738_c0_g1|T…	352	yes
xylan catabolic process	GO:0045493	1.34875e-08	1.3938e-06	--	310	TRINITY_DN90809_c0_g1|TRINITY_DN39280_c0_g1|TRINITY_DN27148_c0_g2|TRINITY_DN76690_c0_g1|TRINITY_DN53933_c0_g1|TRINITY_DN91574_c0_g1|TRINITY_DN73352_c0_g1|TRINITY_DN97586_c0_g1|TRINITY_DN80490_c0_g3|TRINITY_DN36068_c0_g1|TRINITY_DN80490_c0_g2|TRINITY_DN82183_c0_g1|TRINITY_DN82183_c0_g2|TRINITY_DN82183_c0_g5|TRINITY_DN76690_c4_g1|TRINITY_DN76690_c4_g2|TRINITY_DN27023_c0_g1|TRINITY_DN80490_c0_g6|TRI…	136	TRINITY_DN71233_c0_g1|TRINITY_DN83578_c0_g3|TRINITY_DN74746_c2_g5|TRINITY_DN66665_c0_g1|TRINITY_DN32096_c0_g1|TRINITY_DN58032_c0_g1|TRINITY_DN58032_c0_g2|TRINITY_DN76690_c4_g2|TRINITY_DN76690_c4_g1|TRINITY_DN71233_c0_g2|TRINITY_DN68544_c4_g4|TRINITY_DN84075_c4_g4|TRINITY_DN62686_c0_g1|TRINITY_DN57767_c0_g4|TRINITY_DN76792_c1_g4|TRINITY_DN75354_c0_g1|TRINITY_DN80490_c0_g3|TRINITY_DN80490_c0_g2|TRI…	82	TRINITY_DN74746_c2_g2|TRINITY_DN91574_c0_g1|TRINITY_DN74746_c2_g1|TRINITY_DN42273_c0_g1|TRINITY_DN100414_c0_g1|TRINITY_DN76792_c1_g2|TRINITY_DN57767_c0_g1|TRINITY_DN76792_c1_g1|TRINITY_DN84075_c1_g1|TRINITY_DN57767_c0_g5|TRINITY_DN103637_c0_g1|TRINITY_DN78213_c1_g4|TRINITY_DN88147_c0_g1|TRINITY_DN100283_c0_g1|TRINITY_DN39280_c0_g1|TRINITY_DN74746_c2_g3|TRINITY_DN93780_c0_g1|TRINITY_DN93565_c0_g1|…	54	yes
localization	GO:0051179	1.34116e-08	1.3938e-06	GO:1902578	18302	TRINITY_DN74512_c1_g1|TRINITY_DN93582_c0_g1|TRINITY_DN71781_c5_g1|TRINITY_DN71781_c5_g3|TRINITY_DN66447_c0_g2|TRINITY_DN74602_c1_g1|TRINITY_DN46029_c0_g3|TRINITY_DN38342_c0_g1|TRINITY_DN46029_c0_g2|TRINITY_DN67348_c0_g1|TRINITY_DN54296_c1_g1|TRINITY_DN90642_c0_g1|TRINITY_DN85040_c1_g1|TRINITY_DN72775_c0_g1|TRINITY_DN100690_c0_g1|TRINITY_DN34590_c0_g1|TRINITY_DN86646_c0_g3|TRINITY_DN28098_c0_g1|TR…	5593	TRINITY_DN78084_c3_g4|TRINITY_DN78166_c0_g1|TRINITY_DN63748_c0_g2|TRINITY_DN73926_c1_g1|TRINITY_DN62510_c0_g4|TRINITY_DN34254_c0_g1|TRINITY_DN62510_c0_g3|TRINITY_DN67700_c0_g1|TRINITY_DN77392_c1_g3|TRINITY_DN43178_c0_g1|TRINITY_DN65593_c0_g1|TRINITY_DN76165_c0_g4|TRINITY_DN76165_c0_g1|TRINITY_DN8173_c0_g1|TRINITY_DN35948_c0_g1|TRINITY_DN66280_c0_g1|TRINITY_DN77347_c0_g1|TRINITY_DN75413_c1_g2|TRIN…	2477	TRINITY_DN73411_c0_g2|TRINITY_DN80050_c0_g1|TRINITY_DN49576_c0_g2|TRINITY_DN73411_c0_g1|TRINITY_DN65595_c0_g1|TRINITY_DN104718_c0_g1|TRINITY_DN56764_c0_g1|TRINITY_DN56764_c0_g2|TRINITY_DN78779_c1_g1|TRINITY_DN88211_c0_g1|TRINITY_DN97324_c0_g1|TRINITY_DN81969_c0_g6|TRINITY_DN49448_c0_g1|TRINITY_DN77392_c1_g6|TRINITY_DN77392_c1_g1|TRINITY_DN33246_c0_g2|TRINITY_DN77264_c1_g2|TRINITY_DN73030_c3_g1|TR…	3116	yes
multi-organism cellular process	GO:0044764	1.38213e-08	1.41415e-06	--	420	TRINITY_DN66016_c0_g1|TRINITY_DN34717_c0_g2|TRINITY_DN71699_c3_g2|TRINITY_DN69940_c2_g2|TRINITY_DN69940_c2_g1|TRINITY_DN47536_c0_g2|TRINITY_DN73036_c1_g1|TRINITY_DN104953_c0_g1|TRINITY_DN73882_c0_g4|TRINITY_DN103816_c0_g1|TRINITY_DN79549_c2_g3|TRINITY_DN79549_c2_g1|TRINITY_DN38464_c0_g1|TRINITY_DN38464_c0_g2|TRINITY_DN71953_c0_g5|TRINITY_DN87033_c0_g3|TRINITY_DN72528_c0_g1|TRINITY_DN90611_c0_g1|T…	175	TRINITY_DN60713_c0_g1|TRINITY_DN38464_c0_g1|TRINITY_DN70293_c0_g1|TRINITY_DN80508_c2_g2|TRINITY_DN74378_c0_g1|TRINITY_DN71704_c0_g8|TRINITY_DN67221_c0_g4|TRINITY_DN68568_c4_g9|TRINITY_DN73882_c0_g4|TRINITY_DN30433_c0_g2|TRINITY_DN74447_c1_g1|TRINITY_DN77329_c0_g1|TRINITY_DN65740_c2_g1|TRINITY_DN69940_c2_g1|TRINITY_DN69940_c2_g2|TRINITY_DN71613_c0_g1|TRINITY_DN34717_c0_g2|TRINITY_DN79549_c2_g1|TRI…	47	TRINITY_DN66224_c0_g2|TRINITY_DN49963_c0_g1|TRINITY_DN56764_c0_g1|TRINITY_DN56764_c0_g2|TRINITY_DN99016_c0_g1|TRINITY_DN66016_c0_g1|TRINITY_DN99481_c0_g1|TRINITY_DN46193_c0_g2|TRINITY_DN77773_c0_g1|TRINITY_DN64208_c0_g2|TRINITY_DN78524_c1_g1|TRINITY_DN91956_c0_g1|TRINITY_DN35439_c0_g1|TRINITY_DN73069_c0_g1|TRINITY_DN76820_c1_g1|TRINITY_DN21915_c0_g1|TRINITY_DN51754_c0_g2|TRINITY_DN76598_c0_g4|TRI…	128	yes
purine nucleoside triphosphate metabolic process	GO:0009144	1.71313e-08	1.73563e-06	--	1680	TRINITY_DN75569_c2_g4|TRINITY_DN75569_c2_g3|TRINITY_DN33655_c0_g1|TRINITY_DN3189_c0_g1|TRINITY_DN79110_c1_g1|TRINITY_DN77566_c0_g2|TRINITY_DN50613_c0_g1|TRINITY_DN83692_c1_g1|TRINITY_DN74026_c0_g2|TRINITY_DN83692_c1_g3|TRINITY_DN95504_c0_g1|TRINITY_DN83692_c1_g6|TRINITY_DN79605_c2_g1|TRINITY_DN76766_c2_g5|TRINITY_DN79605_c2_g2|TRINITY_DN79605_c2_g5|TRINITY_DN79605_c2_g4|TRINITY_DN74324_c3_g1|TRIN…	589	TRINITY_DN75725_c1_g2|TRINITY_DN75725_c1_g5|TRINITY_DN45144_c0_g1|TRINITY_DN96034_c0_g1|TRINITY_DN68640_c0_g1|TRINITY_DN21715_c0_g1|TRINITY_DN84775_c0_g4|TRINITY_DN72781_c5_g6|TRINITY_DN72791_c0_g1|TRINITY_DN75282_c6_g4|TRINITY_DN77392_c1_g3|TRINITY_DN75725_c1_g4|TRINITY_DN81538_c1_g6|TRINITY_DN83436_c0_g1|TRINITY_DN73154_c0_g1|TRINITY_DN83436_c0_g5|TRINITY_DN77330_c1_g7|TRINITY_DN65561_c0_g2|TRI…	206	TRINITY_DN53029_c0_g1|TRINITY_DN77392_c1_g5|TRINITY_DN15161_c0_g1|TRINITY_DN77392_c1_g1|TRINITY_DN89730_c0_g1|TRINITY_DN50613_c0_g1|TRINITY_DN75643_c2_g1|TRINITY_DN60953_c0_g1|TRINITY_DN7996_c0_g2|TRINITY_DN54363_c0_g1|TRINITY_DN77788_c5_g2|TRINITY_DN103074_c0_g1|TRINITY_DN85268_c1_g3|TRINITY_DN76403_c1_g13|TRINITY_DN77495_c0_g7|TRINITY_DN85268_c1_g4|TRINITY_DN85268_c1_g5|TRINITY_DN89621_c0_g1|TR…	383	yes
transport	GO:0006810	1.83705e-08	1.84311e-06	GO:0015457|GO:0015460|GO:0044765	17039	TRINITY_DN59403_c0_g1|TRINITY_DN48400_c0_g3|TRINITY_DN5486_c0_g1|TRINITY_DN68214_c0_g3|TRINITY_DN103281_c0_g1|TRINITY_DN80374_c2_g2|TRINITY_DN72536_c0_g10|TRINITY_DN77403_c1_g2|TRINITY_DN74512_c1_g1|TRINITY_DN76634_c0_g1|TRINITY_DN77403_c1_g6|TRINITY_DN76165_c0_g2|TRINITY_DN93582_c0_g1|TRINITY_DN3189_c0_g1|TRINITY_DN72434_c0_g2|TRINITY_DN80184_c0_g2|TRINITY_DN42079_c1_g1|TRINITY_DN77238_c1_g8|TRI…	5217	TRINITY_DN78084_c3_g4|TRINITY_DN78166_c0_g1|TRINITY_DN63748_c0_g2|TRINITY_DN73926_c1_g1|TRINITY_DN62510_c0_g4|TRINITY_DN34254_c0_g1|TRINITY_DN62510_c0_g3|TRINITY_DN67700_c0_g1|TRINITY_DN77392_c1_g3|TRINITY_DN43178_c0_g1|TRINITY_DN66938_c0_g1|TRINITY_DN69537_c0_g1|TRINITY_DN76165_c0_g1|TRINITY_DN8173_c0_g1|TRINITY_DN35948_c0_g1|TRINITY_DN77347_c0_g1|TRINITY_DN104134_c0_g1|TRINITY_DN37927_c0_g1|TRI…	2314	TRINITY_DN73411_c0_g2|TRINITY_DN80050_c0_g1|TRINITY_DN73411_c0_g1|TRINITY_DN65595_c0_g1|TRINITY_DN104718_c0_g1|TRINITY_DN56764_c0_g1|TRINITY_DN56764_c0_g2|TRINITY_DN78779_c1_g1|TRINITY_DN88211_c0_g1|TRINITY_DN97324_c0_g1|TRINITY_DN18090_c0_g1|TRINITY_DN77392_c1_g5|TRINITY_DN77392_c1_g6|TRINITY_DN77392_c1_g1|TRINITY_DN33246_c0_g2|TRINITY_DN77264_c1_g2|TRINITY_DN73030_c3_g1|TRINITY_DN76163_c0_g5|TR…	2903	yes
pathogenesis	GO:0009405	1.99867e-08	1.98598e-06	--	929	TRINITY_DN99721_c0_g1|TRINITY_DN46770_c1_g1|TRINITY_DN53468_c0_g1|TRINITY_DN67917_c1_g2|TRINITY_DN85020_c3_g1|TRINITY_DN100120_c0_g1|TRINITY_DN25864_c0_g1|TRINITY_DN68930_c0_g1|TRINITY_DN64030_c0_g2|TRINITY_DN70037_c0_g1|TRINITY_DN79373_c0_g1|TRINITY_DN79373_c0_g2|TRINITY_DN38488_c0_g2|TRINITY_DN68364_c0_g1|TRINITY_DN72134_c1_g4|TRINITY_DN39833_c0_g1|TRINITY_DN72631_c0_g1|TRINITY_DN76690_c4_g13|T…	346	TRINITY_DN60044_c0_g4|TRINITY_DN36295_c0_g3|TRINITY_DN73672_c0_g4|TRINITY_DN74736_c0_g3|TRINITY_DN19145_c0_g1|TRINITY_DN99021_c0_g1|TRINITY_DN68826_c0_g2|TRINITY_DN65095_c0_g5|TRINITY_DN43024_c0_g1|TRINITY_DN79389_c2_g1|TRINITY_DN65095_c0_g1|TRINITY_DN38723_c0_g1|TRINITY_DN83279_c0_g1|TRINITY_DN81780_c1_g6|TRINITY_DN81780_c1_g1|TRINITY_DN30433_c0_g2|TRINITY_DN71449_c0_g1|TRINITY_DN83255_c4_g7|TRI…	174	TRINITY_DN91457_c0_g1|TRINITY_DN43611_c0_g2|TRINITY_DN25864_c0_g1|TRINITY_DN88188_c0_g1|TRINITY_DN99795_c0_g1|TRINITY_DN29151_c0_g2|TRINITY_DN79716_c0_g1|TRINITY_DN78810_c3_g1|TRINITY_DN14364_c0_g1|TRINITY_DN78810_c3_g6|TRINITY_DN43930_c0_g3|TRINITY_DN53780_c0_g2|TRINITY_DN76820_c1_g1|TRINITY_DN42733_c0_g1|TRINITY_DN24239_c0_g1|TRINITY_DN79068_c2_g1|TRINITY_DN37281_c0_g3|TRINITY_DN79068_c2_g5|TRI…	172	yes
import into cell	GO:0098657	2.488e-08	2.44867e-06	--	1449	TRINITY_DN62510_c0_g3|TRINITY_DN62510_c0_g1|TRINITY_DN69940_c2_g2|TRINITY_DN56998_c0_g2|TRINITY_DN33941_c0_g2|TRINITY_DN33941_c0_g3|TRINITY_DN54763_c0_g1|TRINITY_DN33941_c0_g1|TRINITY_DN33941_c0_g4|TRINITY_DN25345_c0_g1|TRINITY_DN75839_c1_g2|TRINITY_DN84602_c2_g3|TRINITY_DN40070_c0_g2|TRINITY_DN71652_c1_g1|TRINITY_DN71652_c1_g2|TRINITY_DN69940_c2_g1|TRINITY_DN62500_c3_g2|TRINITY_DN67348_c0_g1|TRI…	514	TRINITY_DN21715_c0_g1|TRINITY_DN90107_c0_g1|TRINITY_DN79430_c1_g6|TRINITY_DN73441_c3_g7|TRINITY_DN104397_c0_g1|TRINITY_DN62510_c0_g1|TRINITY_DN62510_c0_g3|TRINITY_DN86646_c0_g1|TRINITY_DN79430_c1_g4|TRINITY_DN72791_c0_g1|TRINITY_DN74424_c2_g3|TRINITY_DN66404_c1_g1|TRINITY_DN83502_c1_g1|TRINITY_DN70853_c1_g1|TRINITY_DN59074_c0_g1|TRINITY_DN77835_c0_g1|TRINITY_DN72736_c0_g1|TRINITY_DN93615_c0_g1|TR…	179	TRINITY_DN61783_c0_g3|TRINITY_DN75082_c1_g6|TRINITY_DN61783_c0_g1|TRINITY_DN73411_c0_g1|TRINITY_DN66224_c0_g2|TRINITY_DN79430_c1_g5|TRINITY_DN95019_c0_g1|TRINITY_DN79430_c1_g9|TRINITY_DN74424_c0_g1|TRINITY_DN99016_c0_g1|TRINITY_DN9134_c0_g1|TRINITY_DN76040_c1_g2|TRINITY_DN76040_c1_g3|TRINITY_DN82962_c0_g1|TRINITY_DN42783_c0_g1|TRINITY_DN36985_c0_g1|TRINITY_DN12946_c0_g1|TRINITY_DN42885_c0_g1|TRIN…	335	yes
regulation of purine nucleotide biosynthetic process	GO:1900371	2.59787e-08	2.53268e-06	--	131	TRINITY_DN5148_c0_g1|TRINITY_DN64371_c0_g1|TRINITY_DN81660_c3_g3|TRINITY_DN72810_c1_g1|TRINITY_DN16431_c0_g1|TRINITY_DN74757_c2_g4|TRINITY_DN74757_c2_g2|TRINITY_DN8825_c0_g1|TRINITY_DN53424_c0_g1|TRINITY_DN90888_c0_g1|TRINITY_DN67221_c0_g2|TRINITY_DN76598_c1_g2|TRINITY_DN102451_c0_g1|TRINITY_DN6382_c0_g1|TRINITY_DN104953_c0_g1|TRINITY_DN88477_c0_g1|TRINITY_DN63515_c0_g1|TRINITY_DN63515_c0_g2|TRIN…	68	TRINITY_DN38464_c0_g1|TRINITY_DN16431_c0_g1|TRINITY_DN63515_c0_g2|TRINITY_DN102451_c0_g1|TRINITY_DN76598_c1_g2|TRINITY_DN63515_c0_g1|TRINITY_DN91862_c0_g1|TRINITY_DN104953_c0_g1|TRINITY_DN90887_c0_g1|TRINITY_DN38464_c0_g2|TRINITY_DN73740_c0_g3|TRINITY_DN50403_c0_g1|TRINITY_DN39913_c0_g2|TRINITY_DN74757_c2_g2|TRINITY_DN77829_c0_g1|TRINITY_DN74757_c2_g4|TRINITY_DN60836_c0_g1|TRINITY_DN72054_c4_g7	18	TRINITY_DN67292_c0_g1|TRINITY_DN66224_c0_g2|TRINITY_DN44752_c0_g1|TRINITY_DN56897_c0_g1|TRINITY_DN6382_c0_g1|TRINITY_DN63515_c0_g3|TRINITY_DN5714_c0_g1|TRINITY_DN62309_c0_g3|TRINITY_DN21191_c0_g1|TRINITY_DN13496_c0_g2|TRINITY_DN67221_c0_g2|TRINITY_DN67221_c0_g3|TRINITY_DN63507_c0_g2|TRINITY_DN89636_c0_g1|TRINITY_DN66224_c1_g1|TRINITY_DN73069_c0_g1|TRINITY_DN99457_c0_g1|TRINITY_DN88477_c0_g1|TRINI…	50	yes
regulation of cyclic nucleotide biosynthetic process	GO:0030802	3.18881e-08	3.07973e-06	--	124	TRINITY_DN5148_c0_g1|TRINITY_DN64371_c0_g1|TRINITY_DN88477_c0_g1|TRINITY_DN72810_c1_g1|TRINITY_DN16431_c0_g1|TRINITY_DN74757_c2_g4|TRINITY_DN74757_c2_g2|TRINITY_DN8825_c0_g1|TRINITY_DN53424_c0_g1|TRINITY_DN90888_c0_g1|TRINITY_DN67221_c0_g2|TRINITY_DN76598_c1_g2|TRINITY_DN102451_c0_g1|TRINITY_DN6382_c0_g1|TRINITY_DN104953_c0_g1|TRINITY_DN63515_c0_g1|TRINITY_DN63515_c0_g2|TRINITY_DN63515_c0_g3|TRIN…	65	TRINITY_DN38464_c0_g1|TRINITY_DN16431_c0_g1|TRINITY_DN63515_c0_g2|TRINITY_DN77829_c0_g1|TRINITY_DN102451_c0_g1|TRINITY_DN76598_c1_g2|TRINITY_DN63515_c0_g1|TRINITY_DN104953_c0_g1|TRINITY_DN90887_c0_g1|TRINITY_DN38464_c0_g2|TRINITY_DN73740_c0_g3|TRINITY_DN50403_c0_g1|TRINITY_DN74757_c2_g2|TRINITY_DN72054_c4_g7|TRINITY_DN74757_c2_g4|TRINITY_DN60836_c0_g1|TRINITY_DN39913_c0_g2	17	TRINITY_DN67292_c0_g1|TRINITY_DN66224_c0_g2|TRINITY_DN44752_c0_g1|TRINITY_DN56897_c0_g1|TRINITY_DN6382_c0_g1|TRINITY_DN63515_c0_g3|TRINITY_DN5714_c0_g1|TRINITY_DN62309_c0_g3|TRINITY_DN13496_c0_g2|TRINITY_DN67221_c0_g2|TRINITY_DN67221_c0_g3|TRINITY_DN63507_c0_g2|TRINITY_DN89636_c0_g1|TRINITY_DN66224_c1_g1|TRINITY_DN73069_c0_g1|TRINITY_DN99457_c0_g1|TRINITY_DN88477_c0_g1|TRINITY_DN70748_c4_g1|TRINI…	48	yes
xylan metabolic process	GO:0045491	3.43381e-08	3.28564e-06	--	342	TRINITY_DN90809_c0_g1|TRINITY_DN39280_c0_g1|TRINITY_DN27148_c0_g2|TRINITY_DN76792_c1_g9|TRINITY_DN53933_c0_g1|TRINITY_DN91574_c0_g1|TRINITY_DN73352_c0_g1|TRINITY_DN97586_c0_g1|TRINITY_DN80490_c0_g3|TRINITY_DN36068_c0_g1|TRINITY_DN5747_c0_g1|TRINITY_DN82183_c0_g1|TRINITY_DN82183_c0_g2|TRINITY_DN81546_c0_g3|TRINITY_DN45155_c0_g1|TRINITY_DN76690_c4_g1|TRINITY_DN76690_c4_g2|TRINITY_DN27023_c0_g1|TRIN…	146	TRINITY_DN76690_c4_g2|TRINITY_DN76690_c4_g1|TRINITY_DN71233_c0_g2|TRINITY_DN84075_c4_g4|TRINITY_DN71233_c0_g1|TRINITY_DN84075_c4_g2|TRINITY_DN80490_c0_g3|TRINITY_DN80490_c0_g2|TRINITY_DN80490_c0_g4|TRINITY_DN80490_c0_g6|TRINITY_DN76792_c1_g11|TRINITY_DN78005_c4_g1|TRINITY_DN47368_c0_g2|TRINITY_DN27023_c0_g1|TRINITY_DN47368_c0_g1|TRINITY_DN79608_c0_g1|TRINITY_DN63618_c0_g1|TRINITY_DN18248_c0_g1|TR…	92	TRINITY_DN74746_c2_g2|TRINITY_DN91574_c0_g1|TRINITY_DN74746_c2_g1|TRINITY_DN42273_c0_g1|TRINITY_DN100414_c0_g1|TRINITY_DN30280_c0_g1|TRINITY_DN76792_c1_g2|TRINITY_DN57767_c0_g1|TRINITY_DN76792_c1_g1|TRINITY_DN84075_c1_g1|TRINITY_DN57767_c0_g5|TRINITY_DN103637_c0_g1|TRINITY_DN78213_c1_g4|TRINITY_DN88147_c0_g1|TRINITY_DN100283_c0_g1|TRINITY_DN39280_c0_g1|TRINITY_DN74746_c2_g3|TRINITY_DN93780_c0_g1|…	54	yes
chemotaxis to cAMP	GO:0043327	3.766e-08	3.57044e-06	--	112	TRINITY_DN60942_c0_g1|TRINITY_DN34594_c0_g3|TRINITY_DN74816_c0_g4|TRINITY_DN72810_c1_g1|TRINITY_DN47708_c0_g2|TRINITY_DN47708_c0_g1|TRINITY_DN34594_c0_g5|TRINITY_DN47536_c0_g2|TRINITY_DN76598_c1_g2|TRINITY_DN102451_c0_g1|TRINITY_DN34594_c0_g1|TRINITY_DN67585_c0_g1|TRINITY_DN34594_c0_g2|TRINITY_DN66821_c0_g2|TRINITY_DN66821_c0_g1|TRINITY_DN80720_c0_g2|TRINITY_DN99987_c0_g1|TRINITY_DN53083_c0_g1|TR…	60	TRINITY_DN47536_c0_g2|TRINITY_DN74816_c0_g4|TRINITY_DN39913_c0_g2|TRINITY_DN67585_c0_g1|TRINITY_DN102451_c0_g1|TRINITY_DN76598_c1_g2|TRINITY_DN41587_c0_g1	7	TRINITY_DN61783_c0_g3|TRINITY_DN60607_c0_g4|TRINITY_DN80183_c0_g2|TRINITY_DN60607_c0_g1|TRINITY_DN54731_c0_g1|TRINITY_DN60607_c0_g2|TRINITY_DN95872_c0_g1|TRINITY_DN35397_c0_g2|TRINITY_DN61783_c0_g1|TRINITY_DN5714_c0_g1|TRINITY_DN92537_c0_g1|TRINITY_DN62500_c1_g1|TRINITY_DN61241_c0_g4|TRINITY_DN61241_c0_g5|TRINITY_DN34594_c0_g5|TRINITY_DN34594_c0_g4|TRINITY_DN34594_c0_g3|TRINITY_DN34594_c0_g2|TRIN…	53	yes
ATP biosynthetic process	GO:0006754	4.81474e-08	4.52323e-06	GO:0006758|GO:0006759	742	TRINITY_DN75569_c2_g4|TRINITY_DN75774_c2_g1|TRINITY_DN77166_c3_g1|TRINITY_DN86407_c2_g2|TRINITY_DN75569_c2_g3|TRINITY_DN102708_c0_g1|TRINITY_DN79825_c0_g1|TRINITY_DN75774_c2_g3|TRINITY_DN73563_c1_g1|TRINITY_DN77166_c4_g1|TRINITY_DN8938_c0_g1|TRINITY_DN3189_c0_g1|TRINITY_DN62820_c0_g1|TRINITY_DN77068_c2_g3|TRINITY_DN77068_c2_g1|TRINITY_DN79110_c1_g1|TRINITY_DN78521_c1_g1|TRINITY_DN75643_c2_g1|TRIN…	282	TRINITY_DN45144_c0_g1|TRINITY_DN68640_c0_g1|TRINITY_DN84775_c0_g4|TRINITY_DN72791_c0_g1|TRINITY_DN77392_c1_g3|TRINITY_DN81538_c1_g6|TRINITY_DN81538_c1_g7|TRINITY_DN81538_c1_g8|TRINITY_DN62951_c0_g1|TRINITY_DN44953_c0_g1|TRINITY_DN77495_c0_g3|TRINITY_DN85860_c1_g3|TRINITY_DN87144_c1_g2|TRINITY_DN101849_c0_g1|TRINITY_DN76407_c3_g1|TRINITY_DN86879_c1_g8|TRINITY_DN87193_c3_g3|TRINITY_DN76766_c2_g4|TR…	101	TRINITY_DN72781_c4_g3|TRINITY_DN87193_c0_g1|TRINITY_DN72781_c4_g2|TRINITY_DN53029_c0_g1|TRINITY_DN62820_c0_g1|TRINITY_DN84775_c0_g6|TRINITY_DN77392_c1_g5|TRINITY_DN76526_c0_g1|TRINITY_DN77392_c1_g1|TRINITY_DN87678_c0_g1|TRINITY_DN77495_c0_g9|TRINITY_DN89730_c0_g1|TRINITY_DN76381_c2_g4|TRINITY_DN76381_c2_g3|TRINITY_DN75643_c2_g1|TRINITY_DN22726_c0_g1|TRINITY_DN7996_c0_g2|TRINITY_DN77495_c0_g7|TRIN…	181	yes
regulation of cyclic nucleotide metabolic process	GO:0030799	5.85583e-08	5.45173e-06	--	151	TRINITY_DN5148_c0_g1|TRINITY_DN77153_c2_g6|TRINITY_DN64371_c0_g1|TRINITY_DN88477_c0_g1|TRINITY_DN72810_c1_g1|TRINITY_DN16431_c0_g1|TRINITY_DN74757_c2_g4|TRINITY_DN74757_c2_g2|TRINITY_DN8825_c0_g1|TRINITY_DN53424_c0_g1|TRINITY_DN90888_c0_g1|TRINITY_DN51906_c0_g1|TRINITY_DN76598_c1_g2|TRINITY_DN102451_c0_g1|TRINITY_DN6382_c0_g1|TRINITY_DN104953_c0_g1|TRINITY_DN72315_c6_g1|TRINITY_DN20542_c0_g1|TRIN…	75	TRINITY_DN80414_c0_g4|TRINITY_DN51906_c0_g1|TRINITY_DN38464_c0_g1|TRINITY_DN60836_c0_g1|TRINITY_DN16431_c0_g1|TRINITY_DN63515_c0_g2|TRINITY_DN77829_c0_g1|TRINITY_DN102451_c0_g1|TRINITY_DN76598_c1_g2|TRINITY_DN63515_c0_g1|TRINITY_DN56726_c1_g2|TRINITY_DN104953_c0_g1|TRINITY_DN90887_c0_g1|TRINITY_DN38464_c0_g2|TRINITY_DN73740_c0_g3|TRINITY_DN50403_c0_g1|TRINITY_DN74757_c2_g2|TRINITY_DN72054_c4_g7|T…	21	TRINITY_DN67292_c0_g1|TRINITY_DN66224_c0_g2|TRINITY_DN44752_c0_g1|TRINITY_DN56897_c0_g1|TRINITY_DN75752_c1_g2|TRINITY_DN75752_c1_g7|TRINITY_DN6382_c0_g1|TRINITY_DN63515_c0_g3|TRINITY_DN5714_c0_g1|TRINITY_DN62309_c0_g3|TRINITY_DN13496_c0_g2|TRINITY_DN67221_c0_g2|TRINITY_DN67221_c0_g3|TRINITY_DN63507_c0_g2|TRINITY_DN72315_c3_g2|TRINITY_DN89636_c0_g1|TRINITY_DN66224_c1_g1|TRINITY_DN20542_c0_g1|TRINI…	54	yes
viral RNA genome replication	GO:0039694	7.0935e-08	6.54502e-06	--	46	TRINITY_DN82195_c3_g3|TRINITY_DN14560_c0_g1|TRINITY_DN66902_c0_g1|TRINITY_DN84561_c2_g3|TRINITY_DN86271_c0_g1|TRINITY_DN87569_c9_g2|TRINITY_DN70049_c0_g2|TRINITY_DN70049_c0_g1|TRINITY_DN64091_c0_g1|TRINITY_DN87354_c1_g3|TRINITY_DN84561_c0_g1|TRINITY_DN87354_c0_g1|TRINITY_DN64851_c0_g1|TRINITY_DN87354_c0_g2|TRINITY_DN52871_c0_g1|TRINITY_DN73447_c0_g2|TRINITY_DN81661_c1_g1|TRINITY_DN84561_c1_g1|TRI…	31	TRINITY_DN64091_c0_g1|TRINITY_DN87354_c1_g1|TRINITY_DN87354_c0_g1|TRINITY_DN86271_c0_g1|TRINITY_DN83367_c0_g2|TRINITY_DN67225_c0_g1|TRINITY_DN83367_c0_g6|TRINITY_DN87354_c1_g5|TRINITY_DN73447_c0_g2|TRINITY_DN87354_c1_g4|TRINITY_DN84561_c2_g3|TRINITY_DN87354_c1_g6|TRINITY_DN87354_c0_g2|TRINITY_DN83367_c0_g4|TRINITY_DN70049_c0_g1|TRINITY_DN70049_c0_g2|TRINITY_DN66902_c0_g1|TRINITY_DN84561_c0_g1|TRI…	19	TRINITY_DN52871_c0_g1|TRINITY_DN83367_c0_g8|TRINITY_DN84561_c1_g1|TRINITY_DN83367_c0_g5|TRINITY_DN82195_c3_g3|TRINITY_DN83367_c0_g7|TRINITY_DN87569_c9_g2|TRINITY_DN87354_c1_g3|TRINITY_DN81661_c1_g1|TRINITY_DN14560_c0_g1|TRINITY_DN55423_c0_g3|TRINITY_DN55423_c0_g7	12	yes
establishment of localization	GO:0051234	7.52508e-08	6.88179e-06	--	17194	TRINITY_DN59403_c0_g1|TRINITY_DN78713_c0_g3|TRINITY_DN48400_c0_g3|TRINITY_DN34812_c0_g1|TRINITY_DN68214_c0_g3|TRINITY_DN103281_c0_g1|TRINITY_DN72536_c0_g10|TRINITY_DN50910_c0_g1|TRINITY_DN77403_c1_g2|TRINITY_DN74512_c1_g1|TRINITY_DN76634_c0_g1|TRINITY_DN76165_c0_g3|TRINITY_DN76165_c0_g2|TRINITY_DN76165_c0_g1|TRINITY_DN3189_c0_g1|TRINITY_DN72434_c0_g2|TRINITY_DN80184_c0_g2|TRINITY_DN72434_c0_g4|TR…	5249	TRINITY_DN78084_c3_g4|TRINITY_DN78166_c0_g1|TRINITY_DN63748_c0_g2|TRINITY_DN73926_c1_g1|TRINITY_DN62510_c0_g4|TRINITY_DN34254_c0_g1|TRINITY_DN62510_c0_g3|TRINITY_DN67700_c0_g1|TRINITY_DN77392_c1_g3|TRINITY_DN43178_c0_g1|TRINITY_DN66938_c0_g1|TRINITY_DN76165_c0_g4|TRINITY_DN76165_c0_g1|TRINITY_DN8173_c0_g1|TRINITY_DN35948_c0_g1|TRINITY_DN66280_c0_g1|TRINITY_DN77347_c0_g1|TRINITY_DN104134_c0_g1|TRI…	2334	TRINITY_DN73411_c0_g2|TRINITY_DN80050_c0_g1|TRINITY_DN73411_c0_g1|TRINITY_DN65595_c0_g1|TRINITY_DN104718_c0_g1|TRINITY_DN56764_c0_g1|TRINITY_DN56764_c0_g2|TRINITY_DN78779_c1_g1|TRINITY_DN88211_c0_g1|TRINITY_DN97324_c0_g1|TRINITY_DN18090_c0_g1|TRINITY_DN77392_c1_g5|TRINITY_DN77392_c1_g6|TRINITY_DN77392_c1_g1|TRINITY_DN33246_c0_g2|TRINITY_DN77264_c1_g2|TRINITY_DN73030_c3_g1|TRINITY_DN76163_c0_g5|TR…	2915	yes
hyperosmotic response	GO:0006972	7.62714e-08	6.91393e-06	--	270	TRINITY_DN84231_c0_g1|TRINITY_DN69940_c2_g2|TRINITY_DN69940_c2_g1|TRINITY_DN38128_c0_g1|TRINITY_DN80184_c0_g3|TRINITY_DN58397_c0_g2|TRINITY_DN102699_c0_g1|TRINITY_DN19773_c0_g1|TRINITY_DN103816_c0_g1|TRINITY_DN44250_c0_g2|TRINITY_DN71953_c0_g5|TRINITY_DN77428_c1_g1|TRINITY_DN74483_c1_g3|TRINITY_DN80128_c1_g1|TRINITY_DN80128_c1_g2|TRINITY_DN77980_c1_g8|TRINITY_DN74690_c6_g1|TRINITY_DN89636_c0_g1|T…	119	TRINITY_DN76914_c0_g3|TRINITY_DN75181_c4_g1|TRINITY_DN77980_c1_g8|TRINITY_DN65740_c0_g1|TRINITY_DN36207_c0_g1|TRINITY_DN61994_c1_g1|TRINITY_DN74122_c0_g1|TRINITY_DN80481_c0_g1|TRINITY_DN51686_c0_g1|TRINITY_DN65740_c2_g1|TRINITY_DN77724_c4_g1|TRINITY_DN62794_c0_g1|TRINITY_DN69940_c2_g1|TRINITY_DN69940_c2_g2|TRINITY_DN83207_c0_g1|TRINITY_DN71953_c0_g5|TRINITY_DN72054_c4_g7	17	TRINITY_DN60607_c0_g4|TRINITY_DN99481_c0_g1|TRINITY_DN83047_c2_g1|TRINITY_DN56764_c0_g1|TRINITY_DN56764_c0_g2|TRINITY_DN75635_c0_g1|TRINITY_DN42885_c0_g1|TRINITY_DN68277_c0_g1|TRINITY_DN91823_c0_g1|TRINITY_DN58002_c0_g2|TRINITY_DN56404_c0_g1|TRINITY_DN84231_c0_g1|TRINITY_DN89636_c0_g1|TRINITY_DN31445_c0_g1|TRINITY_DN44044_c0_g1|TRINITY_DN38128_c0_g1|TRINITY_DN80184_c0_g3|TRINITY_DN77171_c1_g4|TRI…	102	yes
cell motility	GO:0048870	7.85782e-08	7.0611e-06	--	590	TRINITY_DN71699_c3_g3|TRINITY_DN52467_c0_g1|TRINITY_DN69940_c2_g2|TRINITY_DN69940_c2_g1|TRINITY_DN35720_c0_g1|TRINITY_DN38128_c0_g1|TRINITY_DN16116_c0_g1|TRINITY_DN69535_c1_g6|TRINITY_DN63707_c0_g2|TRINITY_DN3714_c0_g1|TRINITY_DN65740_c2_g2|TRINITY_DN54914_c0_g3|TRINITY_DN65174_c0_g2|TRINITY_DN36124_c0_g1|TRINITY_DN69500_c0_g1|TRINITY_DN103816_c0_g1|TRINITY_DN76437_c1_g4|TRINITY_DN56686_c0_g1|TRI…	230	TRINITY_DN55045_c1_g1|TRINITY_DN36124_c0_g1|TRINITY_DN73441_c3_g7|TRINITY_DN35609_c0_g3|TRINITY_DN33078_c0_g1|TRINITY_DN34254_c0_g1|TRINITY_DN55205_c0_g2|TRINITY_DN65174_c0_g2|TRINITY_DN100422_c0_g1|TRINITY_DN83498_c1_g3|TRINITY_DN71120_c0_g1|TRINITY_DN50403_c0_g1|TRINITY_DN77788_c4_g1|TRINITY_DN35720_c0_g1|TRINITY_DN72027_c9_g2|TRINITY_DN56726_c1_g2|TRINITY_DN77829_c0_g1|TRINITY_DN72380_c5_g2|TR…	49	TRINITY_DN64880_c0_g2|TRINITY_DN56233_c0_g1|TRINITY_DN44019_c0_g1|TRINITY_DN60607_c0_g2|TRINITY_DN76134_c0_g3|TRINITY_DN56764_c0_g1|TRINITY_DN56764_c0_g2|TRINITY_DN84568_c0_g1|TRINITY_DN76134_c0_g5|TRINITY_DN48262_c0_g1|TRINITY_DN20587_c0_g1|TRINITY_DN42885_c0_g1|TRINITY_DN60607_c0_g1|TRINITY_DN91823_c0_g1|TRINITY_DN72027_c6_g1|TRINITY_DN102869_c0_g1|TRINITY_DN72027_c6_g3|TRINITY_DN56404_c0_g1|TR…	181	yes
ATP metabolic process	GO:0046034	8.70786e-08	7.7575e-06	--	1581	TRINITY_DN75569_c2_g4|TRINITY_DN75774_c2_g1|TRINITY_DN33655_c0_g1|TRINITY_DN23880_c0_g1|TRINITY_DN3189_c0_g1|TRINITY_DN79110_c1_g1|TRINITY_DN79595_c0_g2|TRINITY_DN77566_c0_g2|TRINITY_DN77566_c0_g1|TRINITY_DN74026_c0_g3|TRINITY_DN74026_c0_g2|TRINITY_DN74026_c0_g1|TRINITY_DN75569_c2_g3|TRINITY_DN95504_c0_g1|TRINITY_DN74026_c0_g4|TRINITY_DN79605_c2_g1|TRINITY_DN76766_c2_g5|TRINITY_DN79605_c2_g2|TRIN…	552	TRINITY_DN75725_c1_g2|TRINITY_DN75725_c1_g5|TRINITY_DN75725_c1_g4|TRINITY_DN82074_c0_g2|TRINITY_DN96034_c0_g1|TRINITY_DN68640_c0_g1|TRINITY_DN84775_c0_g4|TRINITY_DN72781_c5_g6|TRINITY_DN72791_c0_g1|TRINITY_DN75282_c6_g4|TRINITY_DN77392_c1_g3|TRINITY_DN45144_c0_g1|TRINITY_DN81538_c1_g6|TRINITY_DN83436_c0_g1|TRINITY_DN73154_c0_g1|TRINITY_DN83436_c0_g5|TRINITY_DN77330_c1_g7|TRINITY_DN65561_c0_g2|TRI…	196	TRINITY_DN53029_c0_g1|TRINITY_DN77392_c1_g5|TRINITY_DN77392_c1_g6|TRINITY_DN77392_c1_g1|TRINITY_DN89730_c0_g1|TRINITY_DN50613_c0_g1|TRINITY_DN75643_c2_g1|TRINITY_DN22726_c0_g1|TRINITY_DN7996_c0_g2|TRINITY_DN54363_c0_g1|TRINITY_DN103074_c0_g1|TRINITY_DN85268_c1_g3|TRINITY_DN76403_c1_g13|TRINITY_DN77495_c0_g7|TRINITY_DN85268_c1_g4|TRINITY_DN85268_c1_g5|TRINITY_DN89621_c0_g1|TRINITY_DN77495_c0_g9|TR…	356	yes
cortical actin cytoskeleton organization	GO:0030866	9.97421e-08	8.8097e-06	GO:0033109	285	TRINITY_DN60942_c0_g1|TRINITY_DN67701_c0_g1|TRINITY_DN75064_c3_g2|TRINITY_DN75064_c3_g1|TRINITY_DN88276_c0_g1|TRINITY_DN81705_c0_g1|TRINITY_DN102451_c0_g1|TRINITY_DN29881_c0_g1|TRINITY_DN71652_c1_g1|TRINITY_DN71652_c1_g2|TRINITY_DN55338_c0_g1|TRINITY_DN70725_c0_g4|TRINITY_DN70725_c0_g3|TRINITY_DN70725_c0_g1|TRINITY_DN74594_c0_g1|TRINITY_DN37056_c0_g1|TRINITY_DN74319_c0_g5|TRINITY_DN99320_c0_g1|TR…	124	TRINITY_DN60895_c0_g3|TRINITY_DN90107_c0_g1|TRINITY_DN67701_c1_g1|TRINITY_DN76820_c1_g2|TRINITY_DN70725_c0_g1|TRINITY_DN74594_c0_g1|TRINITY_DN37056_c0_g1|TRINITY_DN17003_c0_g1|TRINITY_DN72406_c2_g2|TRINITY_DN73906_c2_g10|TRINITY_DN71652_c1_g2|TRINITY_DN72663_c2_g4|TRINITY_DN71652_c1_g1|TRINITY_DN71762_c0_g1|TRINITY_DN81089_c0_g1|TRINITY_DN71115_c2_g7|TRINITY_DN39913_c0_g2|TRINITY_DN71115_c2_g5|TR…	50	TRINITY_DN20282_c0_g1|TRINITY_DN67619_c0_g4|TRINITY_DN25022_c0_g1|TRINITY_DN18960_c0_g1|TRINITY_DN8004_c0_g1|TRINITY_DN67348_c0_g1|TRINITY_DN5714_c0_g1|TRINITY_DN70725_c0_g3|TRINITY_DN48909_c0_g2|TRINITY_DN70725_c0_g4|TRINITY_DN51285_c0_g3|TRINITY_DN88276_c0_g1|TRINITY_DN76820_c1_g1|TRINITY_DN51623_c0_g2|TRINITY_DN75248_c5_g1|TRINITY_DN72027_c6_g3|TRINITY_DN71909_c3_g2|TRINITY_DN71115_c2_g1|TRINI…	74	yes
Arp2/3 complex-mediated actin nucleation	GO:0034314	1.14184e-07	9.99981e-06	--	166	TRINITY_DN67701_c0_g1|TRINITY_DN97365_c0_g1|TRINITY_DN72663_c2_g18|TRINITY_DN97781_c0_g1|TRINITY_DN72663_c2_g15|TRINITY_DN45848_c0_g2|TRINITY_DN45848_c0_g1|TRINITY_DN83479_c1_g2|TRINITY_DN26838_c0_g1|TRINITY_DN87830_c0_g1|TRINITY_DN98550_c0_g1|TRINITY_DN26838_c0_g2|TRINITY_DN74483_c3_g1|TRINITY_DN74483_c3_g3|TRINITY_DN74483_c3_g2|TRINITY_DN71115_c0_g1|TRINITY_DN101763_c0_g1|TRINITY_DN74198_c0_g1|…	80	TRINITY_DN76380_c1_g3|TRINITY_DN76380_c1_g1|TRINITY_DN21834_c0_g1|TRINITY_DN90107_c0_g1|TRINITY_DN67701_c1_g1|TRINITY_DN74594_c1_g2|TRINITY_DN29466_c0_g2|TRINITY_DN101763_c0_g1|TRINITY_DN74594_c0_g1|TRINITY_DN76558_c1_g1|TRINITY_DN17003_c0_g1|TRINITY_DN70814_c0_g1|TRINITY_DN68855_c0_g3|TRINITY_DN72663_c2_g18|TRINITY_DN71115_c2_g7|TRINITY_DN72663_c2_g8|TRINITY_DN71115_c2_g5|TRINITY_DN83565_c2_g3|T…	33	TRINITY_DN74483_c3_g3|TRINITY_DN74483_c3_g2|TRINITY_DN74483_c3_g1|TRINITY_DN8004_c0_g1|TRINITY_DN68267_c0_g1|TRINITY_DN48262_c0_g1|TRINITY_DN72663_c2_g15|TRINITY_DN88794_c0_g1|TRINITY_DN51418_c0_g1|TRINITY_DN97365_c0_g1|TRINITY_DN75786_c2_g3|TRINITY_DN71115_c2_g2|TRINITY_DN71115_c2_g1|TRINITY_DN71115_c1_g1|TRINITY_DN67701_c1_g2|TRINITY_DN71115_c2_g4|TRINITY_DN94095_c0_g1|TRINITY_DN1764_c0_g2|TRIN…	47	yes
regulation of nucleotide biosynthetic process	GO:0030808	1.19252e-07	1.03559e-05	--	135	TRINITY_DN5148_c0_g1|TRINITY_DN64371_c0_g1|TRINITY_DN81660_c3_g3|TRINITY_DN72810_c1_g1|TRINITY_DN16431_c0_g1|TRINITY_DN74757_c2_g4|TRINITY_DN74757_c2_g2|TRINITY_DN8825_c0_g1|TRINITY_DN53424_c0_g1|TRINITY_DN90888_c0_g1|TRINITY_DN67221_c0_g2|TRINITY_DN76598_c1_g2|TRINITY_DN102451_c0_g1|TRINITY_DN6382_c0_g1|TRINITY_DN104953_c0_g1|TRINITY_DN88477_c0_g1|TRINITY_DN63515_c0_g1|TRINITY_DN63515_c0_g2|TRIN…	68	TRINITY_DN38464_c0_g1|TRINITY_DN16431_c0_g1|TRINITY_DN63515_c0_g2|TRINITY_DN77829_c0_g1|TRINITY_DN102451_c0_g1|TRINITY_DN76598_c1_g2|TRINITY_DN63515_c0_g1|TRINITY_DN91862_c0_g1|TRINITY_DN104953_c0_g1|TRINITY_DN90887_c0_g1|TRINITY_DN38464_c0_g2|TRINITY_DN73740_c0_g3|TRINITY_DN50403_c0_g1|TRINITY_DN74757_c2_g2|TRINITY_DN72054_c4_g7|TRINITY_DN74757_c2_g4|TRINITY_DN60836_c0_g1|TRINITY_DN39913_c0_g2	18	TRINITY_DN67292_c0_g1|TRINITY_DN66224_c0_g2|TRINITY_DN44752_c0_g1|TRINITY_DN56897_c0_g1|TRINITY_DN6382_c0_g1|TRINITY_DN63515_c0_g3|TRINITY_DN5714_c0_g1|TRINITY_DN62309_c0_g3|TRINITY_DN21191_c0_g1|TRINITY_DN13496_c0_g2|TRINITY_DN67221_c0_g2|TRINITY_DN67221_c0_g3|TRINITY_DN63507_c0_g2|TRINITY_DN89636_c0_g1|TRINITY_DN66224_c1_g1|TRINITY_DN73069_c0_g1|TRINITY_DN99457_c0_g1|TRINITY_DN88477_c0_g1|TRINI…	50	yes
ribonucleoprotein complex assembly	GO:0022618	1.20866e-07	1.04086e-05	--	2666	TRINITY_DN59919_c0_g3|TRINITY_DN59919_c0_g2|TRINITY_DN20655_c0_g1|TRINITY_DN83566_c1_g5|TRINITY_DN69240_c0_g1|TRINITY_DN72281_c0_g2|TRINITY_DN102996_c0_g1|TRINITY_DN86974_c1_g2|TRINITY_DN74118_c2_g3|TRINITY_DN74118_c2_g7|TRINITY_DN74118_c2_g6|TRINITY_DN74118_c2_g4|TRINITY_DN73498_c1_g4|TRINITY_DN75307_c0_g1|TRINITY_DN83996_c7_g14|TRINITY_DN101463_c0_g1|TRINITY_DN74930_c5_g1|TRINITY_DN73818_c0_g1|…	891	TRINITY_DN79485_c4_g1|TRINITY_DN58200_c0_g1|TRINITY_DN72354_c5_g6|TRINITY_DN58200_c0_g2|TRINITY_DN74932_c1_g1|TRINITY_DN78143_c0_g3|TRINITY_DN77837_c0_g8|TRINITY_DN77837_c0_g9|TRINITY_DN90896_c0_g1|TRINITY_DN80001_c2_g1|TRINITY_DN46448_c0_g1|TRINITY_DN75027_c5_g1|TRINITY_DN76032_c3_g4|TRINITY_DN67525_c0_g7|TRINITY_DN74030_c2_g3|TRINITY_DN74030_c2_g1|TRINITY_DN77797_c2_g10|TRINITY_DN101194_c0_g1|T…	361	TRINITY_DN80050_c0_g1|TRINITY_DN46614_c0_g2|TRINITY_DN27958_c0_g1|TRINITY_DN79403_c0_g1|TRINITY_DN3692_c0_g1|TRINITY_DN105298_c0_g1|TRINITY_DN74442_c1_g3|TRINITY_DN104744_c0_g1|TRINITY_DN63806_c1_g1|TRINITY_DN32282_c0_g1|TRINITY_DN15693_c0_g1|TRINITY_DN95123_c0_g1|TRINITY_DN98330_c0_g1|TRINITY_DN76372_c0_g2|TRINITY_DN98900_c0_g1|TRINITY_DN77837_c0_g6|TRINITY_DN73010_c0_g1|TRINITY_DN75039_c0_g1|TR…	530	yes
ribonucleoside triphosphate biosynthetic process	GO:0009201	1.549e-07	1.32292e-05	--	872	TRINITY_DN75569_c2_g4|TRINITY_DN75774_c2_g1|TRINITY_DN75774_c2_g3|TRINITY_DN86407_c2_g2|TRINITY_DN75569_c2_g3|TRINITY_DN102708_c0_g1|TRINITY_DN72781_c4_g1|TRINITY_DN73563_c1_g1|TRINITY_DN77166_c4_g1|TRINITY_DN8938_c0_g1|TRINITY_DN77068_c2_g9|TRINITY_DN76319_c2_g1|TRINITY_DN62820_c0_g1|TRINITY_DN77068_c2_g3|TRINITY_DN77068_c2_g1|TRINITY_DN79110_c1_g1|TRINITY_DN79595_c0_g2|TRINITY_DN78287_c1_g2|TRI…	322	TRINITY_DN21715_c0_g1|TRINITY_DN45144_c0_g1|TRINITY_DN68640_c0_g1|TRINITY_DN84775_c0_g4|TRINITY_DN72791_c0_g1|TRINITY_DN77392_c1_g3|TRINITY_DN81538_c1_g6|TRINITY_DN81538_c1_g7|TRINITY_DN81538_c1_g8|TRINITY_DN62951_c0_g1|TRINITY_DN44953_c0_g1|TRINITY_DN18684_c0_g1|TRINITY_DN77495_c0_g3|TRINITY_DN85860_c1_g3|TRINITY_DN87144_c1_g2|TRINITY_DN101849_c0_g1|TRINITY_DN76407_c3_g1|TRINITY_DN86879_c1_g8|TR…	114	TRINITY_DN72781_c4_g3|TRINITY_DN87193_c0_g1|TRINITY_DN72781_c4_g2|TRINITY_DN52257_c0_g2|TRINITY_DN53029_c0_g1|TRINITY_DN62820_c0_g1|TRINITY_DN84775_c0_g6|TRINITY_DN77392_c1_g5|TRINITY_DN76526_c0_g1|TRINITY_DN77392_c1_g1|TRINITY_DN87678_c0_g1|TRINITY_DN85268_c1_g9|TRINITY_DN89730_c0_g1|TRINITY_DN76381_c2_g4|TRINITY_DN76381_c2_g3|TRINITY_DN87483_c1_g1|TRINITY_DN75643_c2_g1|TRINITY_DN22726_c0_g1|TRI…	208	yes
Ras protein signal transduction	GO:0007265	1.73376e-07	1.46858e-05	--	324	TRINITY_DN71699_c3_g3|TRINITY_DN71699_c3_g4|TRINITY_DN77537_c3_g2|TRINITY_DN104069_c0_g1|TRINITY_DN74757_c2_g4|TRINITY_DN72913_c6_g5|TRINITY_DN54914_c0_g3|TRINITY_DN93339_c0_g1|TRINITY_DN93716_c0_g1|TRINITY_DN89682_c0_g1|TRINITY_DN72528_c2_g1|TRINITY_DN32566_c0_g3|TRINITY_DN68561_c1_g3|TRINITY_DN76644_c4_g18|TRINITY_DN76644_c4_g14|TRINITY_DN73128_c1_g2|TRINITY_DN82195_c4_g3|TRINITY_DN87033_c0_g3|…	137	TRINITY_DN89682_c0_g1|TRINITY_DN79772_c0_g1|TRINITY_DN74487_c1_g2|TRINITY_DN80709_c3_g2|TRINITY_DN74757_c2_g4|TRINITY_DN78834_c2_g5|TRINITY_DN65520_c0_g2|TRINITY_DN72706_c0_g2|TRINITY_DN105337_c0_g1|TRINITY_DN81197_c4_g1|TRINITY_DN72027_c9_g2|TRINITY_DN67951_c0_g2|TRINITY_DN72380_c5_g2|TRINITY_DN68561_c1_g3|TRINITY_DN73128_c1_g2|TRINITY_DN69535_c1_g6|TRINITY_DN73633_c0_g10|TRINITY_DN74383_c4_g2|T…	33	TRINITY_DN56233_c0_g1|TRINITY_DN91985_c0_g1|TRINITY_DN82195_c4_g3|TRINITY_DN20587_c0_g1|TRINITY_DN81831_c0_g1|TRINITY_DN81831_c0_g2|TRINITY_DN75719_c4_g3|TRINITY_DN75719_c4_g5|TRINITY_DN52624_c0_g1|TRINITY_DN87033_c0_g3|TRINITY_DN87033_c0_g2|TRINITY_DN41933_c0_g2|TRINITY_DN72886_c4_g1|TRINITY_DN95393_c0_g1|TRINITY_DN5148_c0_g1|TRINITY_DN32520_c0_g1|TRINITY_DN78524_c6_g2|TRINITY_DN72528_c1_g4|TRIN…	104	yes
ribonucleoside triphosphate metabolic process	GO:0009199	1.82046e-07	1.52948e-05	--	1725	TRINITY_DN75569_c2_g4|TRINITY_DN75569_c2_g3|TRINITY_DN33655_c0_g1|TRINITY_DN3189_c0_g1|TRINITY_DN79110_c1_g1|TRINITY_DN77566_c0_g2|TRINITY_DN50613_c0_g1|TRINITY_DN83692_c1_g1|TRINITY_DN74026_c0_g2|TRINITY_DN83692_c1_g3|TRINITY_DN95504_c0_g1|TRINITY_DN83692_c1_g6|TRINITY_DN79605_c2_g1|TRINITY_DN76766_c2_g5|TRINITY_DN79605_c2_g2|TRINITY_DN79605_c2_g5|TRINITY_DN79605_c2_g4|TRINITY_DN74324_c3_g1|TRIN…	595	TRINITY_DN75725_c1_g2|TRINITY_DN75725_c1_g5|TRINITY_DN45144_c0_g1|TRINITY_DN82074_c0_g2|TRINITY_DN96034_c0_g1|TRINITY_DN68640_c0_g1|TRINITY_DN21715_c0_g1|TRINITY_DN84775_c0_g4|TRINITY_DN78623_c1_g1|TRINITY_DN72791_c0_g1|TRINITY_DN75282_c6_g4|TRINITY_DN77392_c1_g3|TRINITY_DN75725_c1_g4|TRINITY_DN81538_c1_g6|TRINITY_DN83436_c0_g1|TRINITY_DN73154_c0_g1|TRINITY_DN83436_c0_g5|TRINITY_DN77330_c1_g7|TRI…	211	TRINITY_DN53029_c0_g1|TRINITY_DN77392_c1_g5|TRINITY_DN15161_c0_g1|TRINITY_DN77392_c1_g1|TRINITY_DN89730_c0_g1|TRINITY_DN50613_c0_g1|TRINITY_DN75643_c2_g1|TRINITY_DN60953_c0_g1|TRINITY_DN7996_c0_g2|TRINITY_DN54363_c0_g1|TRINITY_DN77788_c5_g2|TRINITY_DN103074_c0_g1|TRINITY_DN85268_c1_g3|TRINITY_DN76403_c1_g13|TRINITY_DN77495_c0_g7|TRINITY_DN85268_c1_g4|TRINITY_DN85268_c1_g5|TRINITY_DN89621_c0_g1|TR…	384	yes
bone resorption	GO:0045453	2.12885e-07	1.77416e-05	--	39	TRINITY_DN71699_c3_g3|TRINITY_DN36426_c0_g1|TRINITY_DN53104_c0_g3|TRINITY_DN78524_c2_g1|TRINITY_DN78524_c5_g1|TRINITY_DN81381_c0_g2|TRINITY_DN77926_c4_g1|TRINITY_DN72528_c1_g1|TRINITY_DN39364_c0_g1|TRINITY_DN82195_c4_g1|TRINITY_DN82195_c4_g3|TRINITY_DN72027_c9_g2|TRINITY_DN57077_c0_g6|TRINITY_DN41530_c0_g1|TRINITY_DN72380_c5_g1|TRINITY_DN30436_c0_g1|TRINITY_DN72380_c5_g2|TRINITY_DN85777_c0_g3|TRI…	27	TRINITY_DN72027_c7_g1|TRINITY_DN77926_c4_g1|TRINITY_DN76345_c2_g4|TRINITY_DN77834_c5_g3|TRINITY_DN72027_c9_g2|TRINITY_DN53104_c0_g3|TRINITY_DN41530_c0_g1|TRINITY_DN72380_c5_g2	8	TRINITY_DN85777_c0_g1|TRINITY_DN85777_c0_g3|TRINITY_DN57077_c0_g6|TRINITY_DN36426_c0_g1|TRINITY_DN78524_c5_g1|TRINITY_DN78524_c2_g1|TRINITY_DN30436_c0_g1|TRINITY_DN82195_c3_g2|TRINITY_DN81381_c0_g2|TRINITY_DN39364_c0_g1|TRINITY_DN82195_c3_g1|TRINITY_DN48851_c0_g4|TRINITY_DN72528_c1_g1|TRINITY_DN80284_c1_g1|TRINITY_DN82195_c4_g3|TRINITY_DN82195_c4_g1|TRINITY_DN71699_c3_g3|TRINITY_DN72380_c5_g1|TRI…	19	yes
cortical cytoskeleton organization	GO:0030865	3.09481e-07	2.55854e-05	--	341	TRINITY_DN60942_c0_g1|TRINITY_DN67701_c0_g1|TRINITY_DN75064_c3_g2|TRINITY_DN75064_c3_g1|TRINITY_DN56082_c0_g1|TRINITY_DN76106_c3_g1|TRINITY_DN81705_c0_g1|TRINITY_DN102451_c0_g1|TRINITY_DN29881_c0_g1|TRINITY_DN74492_c2_g1|TRINITY_DN71652_c1_g1|TRINITY_DN71652_c1_g2|TRINITY_DN71115_c2_g4|TRINITY_DN70725_c0_g4|TRINITY_DN70725_c0_g3|TRINITY_DN70725_c0_g1|TRINITY_DN74594_c0_g1|TRINITY_DN37056_c0_g1|TR…	142	TRINITY_DN55584_c0_g1|TRINITY_DN60895_c0_g3|TRINITY_DN90107_c0_g1|TRINITY_DN73441_c3_g5|TRINITY_DN76820_c1_g2|TRINITY_DN70725_c0_g1|TRINITY_DN75006_c3_g5|TRINITY_DN74594_c0_g1|TRINITY_DN37056_c0_g1|TRINITY_DN17003_c0_g1|TRINITY_DN72406_c2_g2|TRINITY_DN73906_c2_g10|TRINITY_DN75006_c3_g1|TRINITY_DN72663_c2_g4|TRINITY_DN71652_c1_g1|TRINITY_DN71762_c0_g1|TRINITY_DN81089_c0_g1|TRINITY_DN71115_c2_g7|TR…	55	TRINITY_DN36985_c0_g1|TRINITY_DN72027_c6_g1|TRINITY_DN72027_c6_g3|TRINITY_DN75064_c3_g1|TRINITY_DN75064_c3_g2|TRINITY_DN15023_c0_g1|TRINITY_DN73069_c0_g1|TRINITY_DN76820_c1_g1|TRINITY_DN15524_c0_g1|TRINITY_DN67619_c0_g5|TRINITY_DN67619_c0_g4|TRINITY_DN67619_c0_g1|TRINITY_DN63507_c0_g2|TRINITY_DN63507_c0_g1|TRINITY_DN67619_c0_g2|TRINITY_DN78524_c6_g2|TRINITY_DN72380_c2_g1|TRINITY_DN56082_c0_g1|TRI…	87	yes
cellular protein metabolic process	GO:0044267	3.4234e-07	2.80773e-05	--	14544	TRINITY_DN59403_c0_g1|TRINITY_DN61679_c0_g2|TRINITY_DN85272_c2_g2|TRINITY_DN72811_c4_g14|TRINITY_DN100886_c0_g1|TRINITY_DN74308_c0_g1|TRINITY_DN78231_c1_g4|TRINITY_DN78231_c1_g5|TRINITY_DN78231_c1_g3|TRINITY_DN61666_c0_g1|TRINITY_DN78231_c1_g1|TRINITY_DN91757_c0_g1|TRINITY_DN69240_c0_g1|TRINITY_DN42079_c1_g1|TRINITY_DN72817_c1_g1|TRINITY_DN83808_c4_g2|TRINITY_DN70342_c0_g3|TRINITY_DN72709_c4_g1|T…	4451	TRINITY_DN72354_c5_g8|TRINITY_DN30419_c0_g1|TRINITY_DN53340_c0_g1|TRINITY_DN62907_c0_g1|TRINITY_DN79485_c4_g1|TRINITY_DN15752_c0_g1|TRINITY_DN72354_c5_g6|TRINITY_DN99131_c0_g1|TRINITY_DN65786_c0_g7|TRINITY_DN73790_c3_g3|TRINITY_DN73964_c4_g1|TRINITY_DN73497_c0_g1|TRINITY_DN74480_c2_g3|TRINITY_DN69537_c0_g1|TRINITY_DN85235_c1_g2|TRINITY_DN81860_c0_g1|TRINITY_DN74064_c0_g12|TRINITY_DN76956_c0_g3|TR…	1667	TRINITY_DN80050_c0_g1|TRINITY_DN88211_c0_g1|TRINITY_DN34786_c0_g1|TRINITY_DN73497_c0_g3|TRINITY_DN78657_c1_g14|TRINITY_DN73790_c3_g5|TRINITY_DN76655_c0_g2|TRINITY_DN100126_c0_g1|TRINITY_DN91340_c0_g1|TRINITY_DN47223_c0_g1|TRINITY_DN31657_c0_g1|TRINITY_DN76600_c2_g1|TRINITY_DN74442_c1_g3|TRINITY_DN81831_c0_g1|TRINITY_DN74442_c1_g6|TRINITY_DN76600_c2_g4|TRINITY_DN92570_c0_g1|TRINITY_DN63806_c1_g1|T…	2784	yes
cellular macromolecular complex assembly	GO:0034622	3.81702e-07	3.10591e-05	--	4556	TRINITY_DN97069_c0_g1|TRINITY_DN72536_c0_g10|TRINITY_DN72434_c0_g2|TRINITY_DN66984_c0_g1|TRINITY_DN66984_c0_g2|TRINITY_DN102996_c0_g1|TRINITY_DN62671_c0_g1|TRINITY_DN9317_c0_g1|TRINITY_DN73729_c2_g14|TRINITY_DN79318_c0_g1|TRINITY_DN40933_c0_g1|TRINITY_DN3867_c0_g1|TRINITY_DN61140_c0_g1|TRINITY_DN61140_c0_g2|TRINITY_DN82065_c1_g4|TRINITY_DN25865_c0_g2|TRINITY_DN25865_c0_g1|TRINITY_DN37851_c0_g1|TR…	1465	TRINITY_DN70092_c0_g1|TRINITY_DN79485_c4_g1|TRINITY_DN58200_c0_g1|TRINITY_DN72354_c5_g6|TRINITY_DN58200_c0_g2|TRINITY_DN73418_c4_g7|TRINITY_DN74932_c1_g1|TRINITY_DN73418_c4_g4|TRINITY_DN50403_c0_g1|TRINITY_DN37927_c0_g1|TRINITY_DN95634_c0_g1|TRINITY_DN71318_c0_g1|TRINITY_DN78143_c0_g3|TRINITY_DN1647_c0_g1|TRINITY_DN77837_c0_g8|TRINITY_DN77837_c0_g9|TRINITY_DN67973_c1_g13|TRINITY_DN67973_c1_g10|TR…	618	TRINITY_DN80050_c0_g1|TRINITY_DN74071_c1_g1|TRINITY_DN63514_c0_g1|TRINITY_DN95062_c0_g1|TRINITY_DN27958_c0_g1|TRINITY_DN79403_c0_g1|TRINITY_DN48032_c0_g1|TRINITY_DN35804_c0_g1|TRINITY_DN91212_c0_g1|TRINITY_DN105298_c0_g1|TRINITY_DN74442_c1_g3|TRINITY_DN104744_c0_g1|TRINITY_DN63806_c1_g1|TRINITY_DN32282_c0_g1|TRINITY_DN23032_c0_g1|TRINITY_DN73705_c3_g1|TRINITY_DN15693_c0_g1|TRINITY_DN95123_c0_g1|T…	847	yes
ceramide catabolic process	GO:0046514	3.88488e-07	3.11212e-05	--	44	TRINITY_DN47627_c0_g1|TRINITY_DN88608_c0_g1|TRINITY_DN71711_c0_g1|TRINITY_DN35508_c0_g1|TRINITY_DN69500_c0_g1|TRINITY_DN69500_c0_g2|TRINITY_DN43572_c0_g3|TRINITY_DN43572_c0_g2|TRINITY_DN43572_c0_g1|TRINITY_DN5738_c0_g1|TRINITY_DN66491_c0_g1|TRINITY_DN98236_c0_g1|TRINITY_DN60449_c0_g1|TRINITY_DN18513_c0_g1|TRINITY_DN22154_c0_g2|TRINITY_DN51474_c0_g1|TRINITY_DN51457_c0_g2|TRINITY_DN51457_c0_g1|TRIN…	29	TRINITY_DN67138_c0_g1|TRINITY_DN71711_c0_g1|TRINITY_DN60449_c0_g1|TRINITY_DN5738_c0_g1	4	TRINITY_DN53365_c0_g1|TRINITY_DN58076_c0_g2|TRINITY_DN22154_c0_g2|TRINITY_DN98236_c0_g1|TRINITY_DN88608_c0_g1|TRINITY_DN43572_c0_g1|TRINITY_DN43572_c0_g3|TRINITY_DN43572_c0_g2|TRINITY_DN47627_c0_g1|TRINITY_DN63143_c0_g3|TRINITY_DN63143_c0_g2|TRINITY_DN63143_c0_g1|TRINITY_DN69500_c0_g2|TRINITY_DN51457_c0_g1|TRINITY_DN51457_c0_g2|TRINITY_DN69500_c0_g1|TRINITY_DN58164_c0_g2|TRINITY_DN51474_c0_g1|TRI…	25	yes
viral genome replication	GO:0019079	3.88234e-07	3.11212e-05	--	55	TRINITY_DN82195_c3_g3|TRINITY_DN14560_c0_g1|TRINITY_DN66902_c0_g1|TRINITY_DN84561_c2_g3|TRINITY_DN86271_c0_g1|TRINITY_DN87569_c9_g2|TRINITY_DN70049_c0_g2|TRINITY_DN70049_c0_g1|TRINITY_DN82300_c7_g1|TRINITY_DN61687_c0_g3|TRINITY_DN64091_c0_g1|TRINITY_DN87354_c1_g3|TRINITY_DN81661_c1_g1|TRINITY_DN84561_c0_g1|TRINITY_DN87354_c0_g1|TRINITY_DN64851_c0_g1|TRINITY_DN87354_c0_g2|TRINITY_DN52871_c0_g1|TRI…	34	TRINITY_DN82300_c7_g1|TRINITY_DN87354_c1_g1|TRINITY_DN87354_c0_g1|TRINITY_DN86271_c0_g1|TRINITY_DN83367_c0_g2|TRINITY_DN67225_c0_g1|TRINITY_DN83367_c0_g6|TRINITY_DN87354_c1_g5|TRINITY_DN73447_c0_g2|TRINITY_DN64091_c0_g1|TRINITY_DN87354_c1_g4|TRINITY_DN84561_c2_g3|TRINITY_DN87354_c1_g6|TRINITY_DN87354_c0_g2|TRINITY_DN83367_c0_g4|TRINITY_DN70049_c0_g1|TRINITY_DN70049_c0_g2|TRINITY_DN66902_c0_g1|TRI…	20	TRINITY_DN52871_c0_g1|TRINITY_DN83367_c0_g8|TRINITY_DN89631_c0_g1|TRINITY_DN61687_c0_g3|TRINITY_DN84561_c1_g1|TRINITY_DN83367_c0_g5|TRINITY_DN82195_c3_g3|TRINITY_DN83367_c0_g7|TRINITY_DN87569_c9_g2|TRINITY_DN87354_c1_g3|TRINITY_DN81661_c1_g1|TRINITY_DN14560_c0_g1|TRINITY_DN55423_c0_g3|TRINITY_DN55423_c0_g7	14	yes
cell wall macromolecule metabolic process	GO:0044036	4.20507e-07	3.34271e-05	GO:0010382	822	TRINITY_DN90809_c0_g1|TRINITY_DN78005_c0_g1|TRINITY_DN39280_c0_g1|TRINITY_DN92208_c0_g1|TRINITY_DN57767_c0_g5|TRINITY_DN27148_c0_g2|TRINITY_DN84369_c4_g1|TRINITY_DN83578_c0_g3|TRINITY_DN70473_c1_g1|TRINITY_DN6732_c0_g1|TRINITY_DN53933_c0_g1|TRINITY_DN102994_c0_g1|TRINITY_DN91574_c0_g1|TRINITY_DN73352_c0_g1|TRINITY_DN97586_c0_g1|TRINITY_DN83812_c0_g8|TRINITY_DN70393_c0_g1|TRINITY_DN36068_c0_g1|TRI…	303	TRINITY_DN72707_c0_g1|TRINITY_DN11892_c0_g1|TRINITY_DN70393_c0_g1|TRINITY_DN76690_c4_g2|TRINITY_DN76690_c4_g1|TRINITY_DN71233_c0_g2|TRINITY_DN71364_c1_g1|TRINITY_DN84075_c4_g4|TRINITY_DN71233_c0_g1|TRINITY_DN84075_c4_g2|TRINITY_DN76110_c0_g5|TRINITY_DN80490_c0_g3|TRINITY_DN71611_c0_g1|TRINITY_DN80490_c0_g4|TRINITY_DN76110_c0_g3|TRINITY_DN80490_c0_g6|TRINITY_DN70441_c0_g5|TRINITY_DN76792_c1_g11|TR…	157	TRINITY_DN49329_c0_g1|TRINITY_DN65501_c0_g2|TRINITY_DN92272_c0_g1|TRINITY_DN100414_c0_g1|TRINITY_DN73578_c0_g1|TRINITY_DN43462_c0_g2|TRINITY_DN43462_c0_g1|TRINITY_DN83383_c2_g17|TRINITY_DN83383_c2_g16|TRINITY_DN72368_c0_g1|TRINITY_DN76765_c0_g2|TRINITY_DN100283_c0_g1|TRINITY_DN33041_c0_g1|TRINITY_DN58002_c0_g2|TRINITY_DN93780_c0_g1|TRINITY_DN38590_c0_g1|TRINITY_DN63966_c0_g1|TRINITY_DN35791_c0_g2…	146	yes
regulation of response to extracellular stimulus	GO:0032104	4.8375e-07	3.78718e-05	--	176	TRINITY_DN72277_c0_g5|TRINITY_DN93578_c0_g1|TRINITY_DN72277_c0_g6|TRINITY_DN46770_c1_g1|TRINITY_DN72277_c0_g4|TRINITY_DN60713_c0_g1|TRINITY_DN87875_c0_g1|TRINITY_DN8825_c0_g1|TRINITY_DN53424_c0_g1|TRINITY_DN47536_c0_g2|TRINITY_DN83279_c0_g1|TRINITY_DN6382_c0_g1|TRINITY_DN40910_c0_g1|TRINITY_DN63707_c0_g3|TRINITY_DN55882_c0_g1|TRINITY_DN63515_c0_g2|TRINITY_DN20484_c0_g1|TRINITY_DN58245_c0_g1|TRINI…	82	TRINITY_DN60713_c0_g1|TRINITY_DN70293_c0_g1|TRINITY_DN68397_c0_g5|TRINITY_DN76622_c2_g3|TRINITY_DN83279_c0_g1|TRINITY_DN93986_c0_g1|TRINITY_DN50403_c0_g1|TRINITY_DN71291_c0_g1|TRINITY_DN77829_c0_g1|TRINITY_DN85042_c1_g3|TRINITY_DN82912_c0_g1|TRINITY_DN55120_c0_g1|TRINITY_DN74232_c0_g1|TRINITY_DN69556_c1_g2|TRINITY_DN47536_c0_g2|TRINITY_DN81362_c0_g2|TRINITY_DN73817_c0_g1|TRINITY_DN35254_c0_g1|TRI…	24	TRINITY_DN53202_c0_g1|TRINITY_DN40316_c0_g1|TRINITY_DN87875_c0_g1|TRINITY_DN56897_c0_g1|TRINITY_DN95872_c0_g1|TRINITY_DN66350_c0_g1|TRINITY_DN6382_c0_g1|TRINITY_DN59951_c0_g1|TRINITY_DN72277_c0_g6|TRINITY_DN72277_c0_g5|TRINITY_DN72277_c0_g4|TRINITY_DN13496_c0_g2|TRINITY_DN67221_c0_g2|TRINITY_DN105168_c0_g1|TRINITY_DN58245_c0_g1|TRINITY_DN104080_c0_g1|TRINITY_DN20484_c0_g1|TRINITY_DN77389_c3_g1|TR…	58	yes
regulation of response to nutrient levels	GO:0032107	4.8375e-07	3.78718e-05	--	176	TRINITY_DN72277_c0_g5|TRINITY_DN72277_c0_g4|TRINITY_DN72277_c0_g6|TRINITY_DN46770_c1_g1|TRINITY_DN93578_c0_g1|TRINITY_DN60713_c0_g1|TRINITY_DN59951_c0_g1|TRINITY_DN8825_c0_g1|TRINITY_DN53424_c0_g1|TRINITY_DN47536_c0_g2|TRINITY_DN19864_c0_g2|TRINITY_DN6382_c0_g1|TRINITY_DN40910_c0_g1|TRINITY_DN63707_c0_g3|TRINITY_DN55882_c0_g1|TRINITY_DN63515_c0_g2|TRINITY_DN20484_c0_g1|TRINITY_DN58245_c0_g1|TRINI…	82	TRINITY_DN60713_c0_g1|TRINITY_DN70293_c0_g1|TRINITY_DN68397_c0_g5|TRINITY_DN76622_c2_g3|TRINITY_DN83279_c0_g1|TRINITY_DN93986_c0_g1|TRINITY_DN50403_c0_g1|TRINITY_DN71291_c0_g1|TRINITY_DN77829_c0_g1|TRINITY_DN85042_c1_g3|TRINITY_DN82912_c0_g1|TRINITY_DN55120_c0_g1|TRINITY_DN74232_c0_g1|TRINITY_DN69556_c1_g2|TRINITY_DN47536_c0_g2|TRINITY_DN81362_c0_g2|TRINITY_DN73817_c0_g1|TRINITY_DN35254_c0_g1|TRI…	24	TRINITY_DN53202_c0_g1|TRINITY_DN40316_c0_g1|TRINITY_DN87875_c0_g1|TRINITY_DN56897_c0_g1|TRINITY_DN95872_c0_g1|TRINITY_DN66350_c0_g1|TRINITY_DN6382_c0_g1|TRINITY_DN59951_c0_g1|TRINITY_DN72277_c0_g6|TRINITY_DN72277_c0_g5|TRINITY_DN72277_c0_g4|TRINITY_DN13496_c0_g2|TRINITY_DN67221_c0_g2|TRINITY_DN67221_c0_g3|TRINITY_DN58245_c0_g1|TRINITY_DN104080_c0_g1|TRINITY_DN20484_c0_g1|TRINITY_DN77389_c3_g1|TRI…	58	yes
purine ribonucleoside monophosphate metabolic process	GO:0009167	5.02033e-07	3.87165e-05	--	1909	TRINITY_DN75569_c2_g4|TRINITY_DN75569_c2_g3|TRINITY_DN23210_c0_g1|TRINITY_DN33655_c0_g1|TRINITY_DN3189_c0_g1|TRINITY_DN15528_c0_g1|TRINITY_DN79110_c1_g1|TRINITY_DN79595_c0_g2|TRINITY_DN41271_c0_g1|TRINITY_DN77566_c0_g2|TRINITY_DN44319_c0_g3|TRINITY_DN83692_c1_g1|TRINITY_DN74026_c0_g2|TRINITY_DN83692_c1_g3|TRINITY_DN61503_c0_g1|TRINITY_DN78751_c2_g1|TRINITY_DN95504_c0_g1|TRINITY_DN83692_c1_g6|TRIN…	649	TRINITY_DN75725_c1_g2|TRINITY_DN75725_c1_g5|TRINITY_DN45144_c0_g1|TRINITY_DN96034_c0_g1|TRINITY_DN57666_c0_g2|TRINITY_DN68640_c0_g1|TRINITY_DN84775_c0_g4|TRINITY_DN39530_c0_g1|TRINITY_DN78623_c1_g1|TRINITY_DN72791_c0_g1|TRINITY_DN75282_c6_g4|TRINITY_DN77392_c1_g3|TRINITY_DN75725_c1_g4|TRINITY_DN81538_c1_g6|TRINITY_DN83436_c0_g1|TRINITY_DN73154_c0_g1|TRINITY_DN83436_c0_g5|TRINITY_DN77330_c1_g7|TRI…	244	TRINITY_DN53029_c0_g1|TRINITY_DN77392_c1_g5|TRINITY_DN77392_c1_g6|TRINITY_DN77392_c1_g1|TRINITY_DN89730_c0_g1|TRINITY_DN50613_c0_g1|TRINITY_DN75643_c2_g1|TRINITY_DN60953_c0_g1|TRINITY_DN7996_c0_g2|TRINITY_DN54363_c0_g1|TRINITY_DN103074_c0_g1|TRINITY_DN52934_c0_g1|TRINITY_DN85268_c1_g3|TRINITY_DN76403_c1_g13|TRINITY_DN77495_c0_g7|TRINITY_DN85268_c1_g4|TRINITY_DN85268_c1_g5|TRINITY_DN89621_c0_g1|TR…	405	yes
purine nucleoside monophosphate metabolic process	GO:0009126	5.02033e-07	3.87165e-05	--	1909	TRINITY_DN75569_c2_g4|TRINITY_DN75569_c2_g3|TRINITY_DN23210_c0_g1|TRINITY_DN33655_c0_g1|TRINITY_DN3189_c0_g1|TRINITY_DN15528_c0_g1|TRINITY_DN79110_c1_g1|TRINITY_DN79595_c0_g2|TRINITY_DN41271_c0_g1|TRINITY_DN77566_c0_g2|TRINITY_DN44319_c0_g3|TRINITY_DN83692_c1_g1|TRINITY_DN74026_c0_g2|TRINITY_DN83692_c1_g3|TRINITY_DN61503_c0_g1|TRINITY_DN78751_c2_g1|TRINITY_DN95504_c0_g1|TRINITY_DN83692_c1_g6|TRIN…	649	TRINITY_DN75725_c1_g2|TRINITY_DN75725_c1_g5|TRINITY_DN45144_c0_g1|TRINITY_DN96034_c0_g1|TRINITY_DN57666_c0_g2|TRINITY_DN57666_c0_g3|TRINITY_DN84775_c0_g4|TRINITY_DN39530_c0_g1|TRINITY_DN72781_c5_g6|TRINITY_DN72791_c0_g1|TRINITY_DN75282_c6_g4|TRINITY_DN77392_c1_g3|TRINITY_DN75725_c1_g4|TRINITY_DN81538_c1_g6|TRINITY_DN83436_c0_g1|TRINITY_DN73154_c0_g1|TRINITY_DN83436_c0_g5|TRINITY_DN77330_c1_g7|TRI…	244	TRINITY_DN53029_c0_g1|TRINITY_DN77392_c1_g5|TRINITY_DN77392_c1_g6|TRINITY_DN77392_c1_g1|TRINITY_DN89730_c0_g1|TRINITY_DN50613_c0_g1|TRINITY_DN75643_c2_g1|TRINITY_DN60953_c0_g1|TRINITY_DN7996_c0_g2|TRINITY_DN54363_c0_g1|TRINITY_DN103074_c0_g1|TRINITY_DN52934_c0_g1|TRINITY_DN85268_c1_g3|TRINITY_DN76403_c1_g13|TRINITY_DN77495_c0_g7|TRINITY_DN85268_c1_g4|TRINITY_DN85268_c1_g5|TRINITY_DN89621_c0_g1|TR…	405	yes
regulation of cGMP metabolic process	GO:0030823	5.26616e-07	4.03115e-05	--	67	TRINITY_DN70748_c4_g8|TRINITY_DN72810_c1_g1|TRINITY_DN8825_c0_g1|TRINITY_DN53424_c0_g1|TRINITY_DN102451_c0_g1|TRINITY_DN6382_c0_g1|TRINITY_DN20542_c0_g1|TRINITY_DN63515_c0_g1|TRINITY_DN63515_c0_g2|TRINITY_DN63515_c0_g3|TRINITY_DN50403_c0_g1|TRINITY_DN56087_c0_g1|TRINITY_DN88477_c0_g1|TRINITY_DN56897_c0_g1|TRINITY_DN31501_c0_g1|TRINITY_DN99457_c0_g1|TRINITY_DN66350_c0_g1|TRINITY_DN5148_c0_g1|TRINI…	39	TRINITY_DN80414_c0_g4|TRINITY_DN39913_c0_g2|TRINITY_DN50403_c0_g1|TRINITY_DN102451_c0_g1|TRINITY_DN63515_c0_g2|TRINITY_DN63515_c0_g1|TRINITY_DN77829_c0_g1|TRINITY_DN72054_c4_g7	8	TRINITY_DN56897_c0_g1|TRINITY_DN6382_c0_g1|TRINITY_DN5714_c0_g1|TRINITY_DN62309_c0_g3|TRINITY_DN67221_c0_g2|TRINITY_DN67221_c0_g3|TRINITY_DN104080_c0_g1|TRINITY_DN89636_c0_g1|TRINITY_DN20542_c0_g1|TRINITY_DN73069_c0_g1|TRINITY_DN88477_c0_g1|TRINITY_DN70748_c4_g1|TRINITY_DN70748_c4_g6|TRINITY_DN70748_c4_g4|TRINITY_DN70748_c4_g5|TRINITY_DN77829_c0_g3|TRINITY_DN70748_c4_g8|TRINITY_DN31501_c0_g1|TRIN…	31	yes
negative regulation of aggregate size involved in sorocarp development	GO:0031158	5.81489e-07	4.35443e-05	--	28	TRINITY_DN66350_c0_g1|TRINITY_DN67221_c0_g3|TRINITY_DN50403_c0_g1|TRINITY_DN67221_c0_g2|TRINITY_DN77829_c0_g3|TRINITY_DN31501_c0_g1|TRINITY_DN88477_c0_g1|TRINITY_DN77829_c0_g1|TRINITY_DN8825_c0_g1|TRINITY_DN56897_c0_g1|TRINITY_DN53424_c0_g1|TRINITY_DN56087_c0_g1|TRINITY_DN6382_c0_g1|TRINITY_DN94129_c0_g1|TRINITY_DN99457_c0_g1|TRINITY_DN63707_c0_g3|TRINITY_DN63515_c0_g1|TRINITY_DN63515_c0_g2|TRINI…	21	TRINITY_DN50403_c0_g1|TRINITY_DN73817_c0_g1|TRINITY_DN63515_c0_g2|TRINITY_DN77829_c0_g1|TRINITY_DN63515_c0_g1	5	TRINITY_DN67221_c0_g3|TRINITY_DN8825_c0_g1|TRINITY_DN99457_c0_g1|TRINITY_DN63515_c0_g3|TRINITY_DN56897_c0_g1|TRINITY_DN6382_c0_g1|TRINITY_DN63707_c0_g3|TRINITY_DN56087_c0_g1|TRINITY_DN94129_c0_g1|TRINITY_DN88477_c0_g1|TRINITY_DN77829_c0_g3|TRINITY_DN66350_c0_g1|TRINITY_DN67221_c0_g2|TRINITY_DN31501_c0_g1|TRINITY_DN53424_c0_g1|TRINITY_DN104080_c0_g1	16	yes
glucose metabolic process	GO:0006006	5.80957e-07	4.35443e-05	--	724	TRINITY_DN91156_c0_g1|TRINITY_DN74768_c0_g3|TRINITY_DN77571_c0_g1|TRINITY_DN76501_c0_g1|TRINITY_DN80467_c0_g1|TRINITY_DN18363_c0_g1|TRINITY_DN83655_c1_g10|TRINITY_DN83655_c1_g11|TRINITY_DN33655_c0_g1|TRINITY_DN32987_c0_g3|TRINITY_DN79837_c0_g4|TRINITY_DN50_c0_g1|TRINITY_DN79837_c0_g3|TRINITY_DN18672_c0_g2|TRINITY_DN78605_c1_g2|TRINITY_DN5395_c0_g1|TRINITY_DN75126_c0_g1|TRINITY_DN61503_c0_g1|TRINI…	270	TRINITY_DN36713_c0_g1|TRINITY_DN28091_c0_g1|TRINITY_DN76972_c1_g2|TRINITY_DN78605_c1_g2|TRINITY_DN72317_c0_g1|TRINITY_DN75282_c6_g4|TRINITY_DN67870_c0_g1|TRINITY_DN84219_c2_g1|TRINITY_DN66129_c0_g1|TRINITY_DN91685_c0_g1|TRINITY_DN86325_c3_g2|TRINITY_DN86325_c3_g9|TRINITY_DN76650_c6_g4|TRINITY_DN86207_c0_g1|TRINITY_DN76972_c0_g1|TRINITY_DN76972_c0_g2|TRINITY_DN79605_c2_g5|TRINITY_DN79605_c2_g2|TRI…	91	TRINITY_DN24367_c0_g1|TRINITY_DN76972_c1_g4|TRINITY_DN76972_c1_g3|TRINITY_DN76972_c1_g1|TRINITY_DN78605_c1_g1|TRINITY_DN11899_c0_g1|TRINITY_DN78605_c1_g5|TRINITY_DN97987_c0_g1|TRINITY_DN78605_c1_g6|TRINITY_DN76377_c1_g4|TRINITY_DN75282_c6_g6|TRINITY_DN77918_c1_g1|TRINITY_DN77918_c1_g5|TRINITY_DN93706_c0_g1|TRINITY_DN84219_c2_g4|TRINITY_DN76156_c0_g3|TRINITY_DN83655_c1_g8|TRINITY_DN53564_c0_g1|TRI…	179	yes
protein depolymerization	GO:0051261	5.79373e-07	4.35443e-05	--	182	TRINITY_DN52741_c0_g1|TRINITY_DN90001_c0_g1|TRINITY_DN76267_c0_g1|TRINITY_DN69940_c2_g2|TRINITY_DN52065_c0_g2|TRINITY_DN69940_c2_g1|TRINITY_DN73982_c0_g1|TRINITY_DN74757_c2_g4|TRINITY_DN73982_c0_g2|TRINITY_DN57431_c0_g1|TRINITY_DN37341_c0_g1|TRINITY_DN104087_c0_g1|TRINITY_DN63494_c2_g1|TRINITY_DN25345_c0_g1|TRINITY_DN80056_c1_g1|TRINITY_DN66065_c0_g3|TRINITY_DN66065_c0_g2|TRINITY_DN25697_c0_g1|TR…	84	TRINITY_DN72937_c1_g6|TRINITY_DN72937_c1_g4|TRINITY_DN34254_c0_g1|TRINITY_DN103590_c0_g1|TRINITY_DN64715_c0_g3|TRINITY_DN100422_c0_g1|TRINITY_DN74757_c2_g4|TRINITY_DN65740_c0_g1|TRINITY_DN58276_c0_g1|TRINITY_DN65740_c2_g1|TRINITY_DN77122_c0_g1|TRINITY_DN69940_c2_g1|TRINITY_DN69940_c2_g2|TRINITY_DN93952_c0_g1|TRINITY_DN66065_c0_g3|TRINITY_DN17058_c0_g1|TRINITY_DN34688_c0_g1|TRINITY_DN73982_c0_g2|T…	24	TRINITY_DN61783_c0_g3|TRINITY_DN61783_c0_g1|TRINITY_DN69940_c0_g1|TRINITY_DN99481_c0_g1|TRINITY_DN93968_c0_g1|TRINITY_DN56764_c0_g1|TRINITY_DN56764_c0_g2|TRINITY_DN44909_c0_g1|TRINITY_DN99113_c0_g1|TRINITY_DN72937_c1_g2|TRINITY_DN38445_c0_g1|TRINITY_DN59070_c0_g1|TRINITY_DN27955_c0_g2|TRINITY_DN27955_c0_g1|TRINITY_DN76267_c0_g1|TRINITY_DN99704_c0_g1|TRINITY_DN37341_c0_g1|TRINITY_DN57431_c0_g1|TRI…	60	yes
regulation of translational fidelity	GO:0006450	6.09357e-07	4.53028e-05	GO:0000029	193	TRINITY_DN74250_c5_g2|TRINITY_DN81535_c0_g1|TRINITY_DN73233_c3_g2|TRINITY_DN85884_c1_g2|TRINITY_DN85884_c1_g3|TRINITY_DN85884_c1_g4|TRINITY_DN74532_c0_g9|TRINITY_DN79065_c1_g1|TRINITY_DN74532_c0_g3|TRINITY_DN74532_c0_g2|TRINITY_DN74532_c0_g6|TRINITY_DN101561_c0_g1|TRINITY_DN79715_c3_g1|TRINITY_DN75789_c3_g2|TRINITY_DN75789_c3_g6|TRINITY_DN75789_c3_g4|TRINITY_DN74208_c3_g1|TRINITY_DN74208_c3_g2|TR…	88	TRINITY_DN74532_c0_g3|TRINITY_DN72944_c0_g1|TRINITY_DN75789_c3_g4|TRINITY_DN60717_c0_g4|TRINITY_DN60717_c0_g3|TRINITY_DN75789_c3_g2|TRINITY_DN73233_c3_g2|TRINITY_DN62086_c0_g1|TRINITY_DN81860_c0_g1|TRINITY_DN79584_c3_g9|TRINITY_DN84450_c1_g8|TRINITY_DN73694_c4_g2|TRINITY_DN80958_c1_g5|TRINITY_DN79584_c3_g5|TRINITY_DN84693_c2_g10|TRINITY_DN80646_c2_g5|TRINITY_DN34667_c0_g1|TRINITY_DN69004_c1_g3|TR…	25	TRINITY_DN74532_c0_g6|TRINITY_DN74532_c0_g2|TRINITY_DN74457_c2_g1|TRINITY_DN74250_c2_g1|TRINITY_DN85884_c1_g2|TRINITY_DN85884_c1_g3|TRINITY_DN85522_c3_g1|TRINITY_DN74532_c0_g9|TRINITY_DN77802_c2_g1|TRINITY_DN83227_c0_g1|TRINITY_DN83227_c1_g1|TRINITY_DN81535_c1_g3|TRINITY_DN83227_c1_g4|TRINITY_DN74208_c3_g2|TRINITY_DN79584_c3_g3|TRINITY_DN74208_c3_g1|TRINITY_DN34786_c0_g1|TRINITY_DN85404_c2_g7|TRI…	63	yes
regulation of purine nucleotide metabolic process	GO:1900542	6.76156e-07	4.991e-05	--	218	TRINITY_DN74757_c2_g4|TRINITY_DN74757_c2_g2|TRINITY_DN3714_c0_g1|TRINITY_DN104953_c0_g1|TRINITY_DN72315_c6_g1|TRINITY_DN20542_c0_g1|TRINITY_DN38464_c0_g1|TRINITY_DN38464_c0_g2|TRINITY_DN100320_c0_g1|TRINITY_DN60175_c0_g3|TRINITY_DN89636_c0_g1|TRINITY_DN72054_c4_g7|TRINITY_DN16352_c0_g1|TRINITY_DN60752_c0_g1|TRINITY_DN60752_c0_g3|TRINITY_DN72942_c0_g4|TRINITY_DN102451_c0_g1|TRINITY_DN81362_c0_g4|T…	97	TRINITY_DN63515_c0_g2|TRINITY_DN79683_c2_g4|TRINITY_DN74757_c2_g2|TRINITY_DN73740_c0_g3|TRINITY_DN72315_c6_g1|TRINITY_DN39913_c0_g2|TRINITY_DN50403_c0_g1|TRINITY_DN60175_c0_g3|TRINITY_DN67536_c0_g2|TRINITY_DN67536_c0_g1|TRINITY_DN56726_c1_g2|TRINITY_DN77829_c0_g1|TRINITY_DN60836_c0_g1|TRINITY_DN76898_c2_g1|TRINITY_DN72054_c4_g7|TRINITY_DN80414_c0_g4|TRINITY_DN51906_c0_g1|TRINITY_DN72942_c0_g4|TRI…	32	TRINITY_DN54310_c0_g2|TRINITY_DN67292_c0_g1|TRINITY_DN66224_c0_g2|TRINITY_DN44752_c0_g1|TRINITY_DN56897_c0_g1|TRINITY_DN75752_c1_g2|TRINITY_DN75752_c1_g7|TRINITY_DN6382_c0_g1|TRINITY_DN102974_c0_g1|TRINITY_DN5714_c0_g1|TRINITY_DN53585_c0_g1|TRINITY_DN21191_c0_g1|TRINITY_DN63507_c0_g2|TRINITY_DN71909_c1_g1|TRINITY_DN67221_c0_g2|TRINITY_DN8825_c0_g1|TRINITY_DN104080_c0_g1|TRINITY_DN72315_c3_g2|TRIN…	65	yes
purine ribonucleotide metabolic process	GO:0009150	7.01845e-07	5.14388e-05	--	2115	TRINITY_DN75569_c2_g4|TRINITY_DN75569_c2_g3|TRINITY_DN23210_c0_g1|TRINITY_DN33655_c0_g1|TRINITY_DN3189_c0_g1|TRINITY_DN15528_c0_g1|TRINITY_DN79110_c1_g1|TRINITY_DN79595_c0_g2|TRINITY_DN41271_c0_g1|TRINITY_DN77566_c0_g2|TRINITY_DN44319_c0_g3|TRINITY_DN83692_c1_g1|TRINITY_DN74026_c0_g2|TRINITY_DN74026_c0_g1|TRINITY_DN78751_c2_g1|TRINITY_DN95504_c0_g1|TRINITY_DN74026_c0_g4|TRINITY_DN79605_c2_g1|TRIN…	712	TRINITY_DN21715_c0_g1|TRINITY_DN75725_c1_g5|TRINITY_DN45144_c0_g1|TRINITY_DN96034_c0_g1|TRINITY_DN57666_c0_g2|TRINITY_DN68640_c0_g1|TRINITY_DN75725_c1_g2|TRINITY_DN84775_c0_g4|TRINITY_DN78176_c1_g3|TRINITY_DN39530_c0_g1|TRINITY_DN72781_c5_g6|TRINITY_DN72791_c0_g1|TRINITY_DN75282_c6_g4|TRINITY_DN77392_c1_g3|TRINITY_DN66734_c0_g1|TRINITY_DN81538_c1_g6|TRINITY_DN83436_c0_g1|TRINITY_DN73154_c0_g1|TRI…	267	TRINITY_DN53029_c0_g1|TRINITY_DN77392_c1_g5|TRINITY_DN77392_c1_g6|TRINITY_DN77392_c1_g1|TRINITY_DN89730_c0_g1|TRINITY_DN50613_c0_g1|TRINITY_DN75643_c2_g1|TRINITY_DN60953_c0_g1|TRINITY_DN7996_c0_g2|TRINITY_DN54363_c0_g1|TRINITY_DN77788_c5_g2|TRINITY_DN103074_c0_g1|TRINITY_DN52934_c0_g1|TRINITY_DN85268_c1_g3|TRINITY_DN76403_c1_g13|TRINITY_DN77495_c0_g7|TRINITY_DN85268_c1_g4|TRINITY_DN85268_c1_g5|TR…	445	yes
positive regulation of protein complex assembly	GO:0031334	7.35688e-07	5.35394e-05	--	542	TRINITY_DN60942_c0_g1|TRINITY_DN71699_c3_g3|TRINITY_DN75064_c3_g2|TRINITY_DN59366_c1_g4|TRINITY_DN29090_c0_g1|TRINITY_DN72315_c6_g1|TRINITY_DN71115_c1_g1|TRINITY_DN71115_c2_g5|TRINITY_DN94002_c0_g1|TRINITY_DN71699_c3_g4|TRINITY_DN72528_c2_g1|TRINITY_DN78157_c2_g3|TRINITY_DN75064_c3_g1|TRINITY_DN56686_c0_g1|TRINITY_DN52588_c0_g4|TRINITY_DN82195_c4_g1|TRINITY_DN79298_c3_g10|TRINITY_DN38342_c0_g1|TR…	209	TRINITY_DN76380_c1_g3|TRINITY_DN74165_c5_g1|TRINITY_DN76380_c1_g1|TRINITY_DN21834_c0_g1|TRINITY_DN90107_c0_g1|TRINITY_DN67701_c1_g1|TRINITY_DN56125_c0_g2|TRINITY_DN75909_c6_g1|TRINITY_DN72937_c1_g4|TRINITY_DN29466_c0_g2|TRINITY_DN101763_c0_g1|TRINITY_DN69199_c0_g1|TRINITY_DN74594_c0_g1|TRINITY_DN76558_c1_g1|TRINITY_DN17003_c0_g1|TRINITY_DN50654_c0_g1|TRINITY_DN73441_c3_g7|TRINITY_DN72315_c6_g1|TR…	79	TRINITY_DN99764_c0_g1|TRINITY_DN74483_c3_g2|TRINITY_DN74483_c3_g1|TRINITY_DN83296_c2_g1|TRINITY_DN75752_c1_g2|TRINITY_DN75752_c1_g7|TRINITY_DN78157_c2_g3|TRINITY_DN74483_c3_g3|TRINITY_DN75786_c2_g3|TRINITY_DN72315_c3_g2|TRINITY_DN75064_c3_g1|TRINITY_DN75064_c3_g2|TRINITY_DN91148_c0_g1|TRINITY_DN97781_c0_g1|TRINITY_DN79298_c4_g1|TRINITY_DN89636_c0_g1|TRINITY_DN76670_c2_g1|TRINITY_DN87033_c0_g2|TRI…	130	yes
nucleoside triphosphate biosynthetic process	GO:0009142	8.09924e-07	5.82226e-05	--	895	TRINITY_DN75569_c2_g4|TRINITY_DN75774_c2_g1|TRINITY_DN75774_c2_g3|TRINITY_DN86407_c2_g2|TRINITY_DN75569_c2_g3|TRINITY_DN102708_c0_g1|TRINITY_DN72781_c4_g1|TRINITY_DN73563_c1_g1|TRINITY_DN77166_c4_g1|TRINITY_DN8938_c0_g1|TRINITY_DN77068_c2_g9|TRINITY_DN76319_c2_g1|TRINITY_DN62820_c0_g1|TRINITY_DN77068_c2_g3|TRINITY_DN77068_c2_g1|TRINITY_DN79110_c1_g1|TRINITY_DN98413_c0_g1|TRINITY_DN78287_c1_g2|TRI…	325	TRINITY_DN21715_c0_g1|TRINITY_DN45144_c0_g1|TRINITY_DN68640_c0_g1|TRINITY_DN84775_c0_g4|TRINITY_DN72791_c0_g1|TRINITY_DN77392_c1_g3|TRINITY_DN81538_c1_g6|TRINITY_DN81538_c1_g7|TRINITY_DN81538_c1_g8|TRINITY_DN62951_c0_g1|TRINITY_DN44953_c0_g1|TRINITY_DN18684_c0_g1|TRINITY_DN77495_c0_g3|TRINITY_DN85860_c1_g3|TRINITY_DN87144_c1_g2|TRINITY_DN101849_c0_g1|TRINITY_DN76407_c3_g1|TRINITY_DN86879_c1_g8|TR…	115	TRINITY_DN72781_c4_g3|TRINITY_DN87193_c0_g1|TRINITY_DN72781_c4_g2|TRINITY_DN52257_c0_g2|TRINITY_DN53029_c0_g1|TRINITY_DN62820_c0_g1|TRINITY_DN84775_c0_g6|TRINITY_DN77392_c1_g5|TRINITY_DN76526_c0_g1|TRINITY_DN77392_c1_g1|TRINITY_DN87678_c0_g1|TRINITY_DN85268_c1_g9|TRINITY_DN89730_c0_g1|TRINITY_DN76381_c2_g4|TRINITY_DN76381_c2_g3|TRINITY_DN87483_c1_g1|TRINITY_DN75643_c2_g1|TRINITY_DN22726_c0_g1|TRI…	210	yes
monosaccharide metabolic process	GO:0005996	8.11308e-07	5.82226e-05	--	1470	TRINITY_DN82661_c1_g4|TRINITY_DN50665_c0_g1|TRINITY_DN58460_c0_g1|TRINITY_DN61666_c0_g1|TRINITY_DN33655_c0_g1|TRINITY_DN69513_c0_g1|TRINITY_DN18672_c0_g2|TRINITY_DN77067_c2_g5|TRINITY_DN77067_c2_g4|TRINITY_DN64695_c0_g3|TRINITY_DN77067_c2_g2|TRINITY_DN93894_c0_g1|TRINITY_DN77566_c0_g2|TRINITY_DN77566_c0_g1|TRINITY_DN64092_c0_g2|TRINITY_DN77918_c2_g1|TRINITY_DN79605_c2_g1|TRINITY_DN79605_c2_g2|TRI…	509	TRINITY_DN36713_c0_g1|TRINITY_DN28091_c0_g1|TRINITY_DN79723_c1_g3|TRINITY_DN64147_c0_g2|TRINITY_DN64147_c0_g1|TRINITY_DN82100_c0_g1|TRINITY_DN22011_c0_g1|TRINITY_DN78605_c1_g2|TRINITY_DN61765_c0_g1|TRINITY_DN72317_c0_g1|TRINITY_DN73191_c0_g1|TRINITY_DN75282_c6_g4|TRINITY_DN67870_c0_g1|TRINITY_DN65561_c0_g2|TRINITY_DN53180_c0_g2|TRINITY_DN53180_c0_g1|TRINITY_DN84219_c2_g1|TRINITY_DN73278_c0_g1|TRI…	212	TRINITY_DN79723_c1_g6|TRINITY_DN79723_c1_g5|TRINITY_DN79723_c1_g2|TRINITY_DN79723_c1_g1|TRINITY_DN24367_c0_g1|TRINITY_DN77067_c2_g2|TRINITY_DN76972_c1_g4|TRINITY_DN100228_c0_g1|TRINITY_DN76972_c1_g3|TRINITY_DN77067_c2_g5|TRINITY_DN77067_c2_g4|TRINITY_DN78605_c1_g1|TRINITY_DN71678_c0_g1|TRINITY_DN11899_c0_g1|TRINITY_DN78605_c1_g5|TRINITY_DN103708_c0_g1|TRINITY_DN78605_c1_g6|TRINITY_DN94121_c0_g1|T…	297	yes
hydrogen ion transmembrane transport	GO:1902600	8.69171e-07	6.19449e-05	--	945	TRINITY_DN75569_c2_g4|TRINITY_DN95595_c0_g1|TRINITY_DN83793_c2_g3|TRINITY_DN86407_c2_g2|TRINITY_DN75569_c2_g3|TRINITY_DN76140_c1_g7|TRINITY_DN72690_c0_g1|TRINITY_DN76140_c1_g5|TRINITY_DN76140_c1_g4|TRINITY_DN76140_c1_g2|TRINITY_DN76140_c1_g1|TRINITY_DN99245_c0_g1|TRINITY_DN76173_c0_g2|TRINITY_DN74026_c2_g2|TRINITY_DN73563_c1_g1|TRINITY_DN77166_c4_g1|TRINITY_DN8938_c0_g1|TRINITY_DN3189_c0_g1|TRINI…	341	TRINITY_DN75725_c1_g2|TRINITY_DN75725_c1_g5|TRINITY_DN45144_c0_g1|TRINITY_DN11892_c0_g1|TRINITY_DN70393_c0_g1|TRINITY_DN68640_c0_g1|TRINITY_DN72834_c1_g1|TRINITY_DN84775_c0_g4|TRINITY_DN72791_c0_g1|TRINITY_DN77392_c1_g3|TRINITY_DN49403_c0_g1|TRINITY_DN81538_c1_g6|TRINITY_DN81538_c1_g7|TRINITY_DN81538_c1_g8|TRINITY_DN62951_c0_g1|TRINITY_DN76140_c1_g1|TRINITY_DN74026_c2_g2|TRINITY_DN44953_c0_g1|TRI…	123	TRINITY_DN75725_c1_g3|TRINITY_DN72781_c4_g3|TRINITY_DN87193_c0_g1|TRINITY_DN97814_c0_g1|TRINITY_DN82895_c0_g5|TRINITY_DN72781_c4_g2|TRINITY_DN97302_c0_g1|TRINITY_DN76886_c1_g3|TRINITY_DN101609_c0_g1|TRINITY_DN53029_c0_g1|TRINITY_DN62820_c0_g1|TRINITY_DN53021_c0_g3|TRINITY_DN84775_c0_g6|TRINITY_DN81050_c1_g1|TRINITY_DN54874_c0_g2|TRINITY_DN81050_c1_g2|TRINITY_DN77392_c1_g1|TRINITY_DN87678_c0_g1|TR…	218	yes
ribonucleoprotein complex subunit organization	GO:0071826	1.02131e-06	7.22894e-05	--	2727	TRINITY_DN59919_c0_g3|TRINITY_DN59919_c0_g2|TRINITY_DN83566_c1_g5|TRINITY_DN69240_c0_g1|TRINITY_DN72281_c0_g2|TRINITY_DN102996_c0_g1|TRINITY_DN86974_c1_g2|TRINITY_DN74118_c2_g3|TRINITY_DN74118_c2_g7|TRINITY_DN74118_c2_g6|TRINITY_DN74118_c2_g4|TRINITY_DN73498_c1_g4|TRINITY_DN79949_c1_g2|TRINITY_DN83996_c7_g14|TRINITY_DN101463_c0_g1|TRINITY_DN74930_c5_g1|TRINITY_DN73818_c0_g1|TRINITY_DN87666_c0_g1|…	900	TRINITY_DN79485_c4_g1|TRINITY_DN58200_c0_g1|TRINITY_DN72354_c5_g6|TRINITY_DN58200_c0_g2|TRINITY_DN74932_c1_g1|TRINITY_DN78143_c0_g3|TRINITY_DN77837_c0_g8|TRINITY_DN77837_c0_g9|TRINITY_DN90896_c0_g1|TRINITY_DN80001_c2_g1|TRINITY_DN46448_c0_g1|TRINITY_DN75027_c5_g1|TRINITY_DN76032_c3_g4|TRINITY_DN67525_c0_g7|TRINITY_DN74030_c2_g3|TRINITY_DN74030_c2_g1|TRINITY_DN74030_c2_g5|TRINITY_DN101194_c0_g1|TR…	365	TRINITY_DN80050_c0_g1|TRINITY_DN46614_c0_g2|TRINITY_DN27958_c0_g1|TRINITY_DN79403_c0_g1|TRINITY_DN3692_c0_g1|TRINITY_DN105298_c0_g1|TRINITY_DN74442_c1_g3|TRINITY_DN104744_c0_g1|TRINITY_DN63806_c1_g1|TRINITY_DN32282_c0_g1|TRINITY_DN15693_c0_g1|TRINITY_DN95123_c0_g1|TRINITY_DN98330_c0_g1|TRINITY_DN76372_c0_g2|TRINITY_DN98900_c0_g1|TRINITY_DN77837_c0_g6|TRINITY_DN73010_c0_g1|TRINITY_DN75039_c0_g1|TR…	535	yes
ribonucleoprotein complex biogenesis	GO:0022613	1.05514e-06	7.41756e-05	--	1549	TRINITY_DN19290_c0_g1|TRINITY_DN24111_c0_g1|TRINITY_DN24111_c0_g2|TRINITY_DN92671_c0_g1|TRINITY_DN72428_c1_g3|TRINITY_DN16851_c0_g1|TRINITY_DN67838_c0_g3|TRINITY_DN72709_c4_g1|TRINITY_DN59188_c2_g4|TRINITY_DN59188_c2_g2|TRINITY_DN84749_c0_g6|TRINITY_DN85731_c2_g3|TRINITY_DN84749_c0_g4|TRINITY_DN85731_c2_g6|TRINITY_DN85731_c2_g5|TRINITY_DN77173_c2_g4|TRINITY_DN77173_c2_g2|TRINITY_DN74064_c0_g8|TRI…	533	TRINITY_DN60644_c0_g2|TRINITY_DN74067_c0_g3|TRINITY_DN73254_c2_g6|TRINITY_DN77711_c1_g8|TRINITY_DN31674_c0_g1|TRINITY_DN59113_c0_g1|TRINITY_DN74063_c2_g14|TRINITY_DN80795_c0_g2|TRINITY_DN80795_c0_g1|TRINITY_DN15325_c0_g1|TRINITY_DN47621_c0_g3|TRINITY_DN47621_c0_g1|TRINITY_DN61195_c0_g1|TRINITY_DN85987_c0_g1|TRINITY_DN50749_c0_g2|TRINITY_DN48153_c0_g3|TRINITY_DN77504_c2_g9|TRINITY_DN20269_c0_g1|TR…	204	TRINITY_DN34958_c0_g2|TRINITY_DN74457_c2_g1|TRINITY_DN83893_c3_g1|TRINITY_DN82037_c2_g10|TRINITY_DN74067_c0_g9|TRINITY_DN73254_c2_g5|TRINITY_DN73254_c2_g4|TRINITY_DN73254_c2_g3|TRINITY_DN48430_c0_g2|TRINITY_DN38564_c0_g2|TRINITY_DN74063_c2_g12|TRINITY_DN74586_c3_g5|TRINITY_DN94416_c0_g1|TRINITY_DN70871_c1_g1|TRINITY_DN74208_c3_g2|TRINITY_DN74488_c1_g3|TRINITY_DN74488_c1_g1|TRINITY_DN105427_c0_g1|…	329	yes
ion transport	GO:0006811	1.09241e-06	7.62769e-05	--	5244	TRINITY_DN59403_c0_g1|TRINITY_DN48400_c0_g3|TRINITY_DN76634_c0_g1|TRINITY_DN3189_c0_g1|TRINITY_DN50047_c0_g2|TRINITY_DN71781_c5_g1|TRINITY_DN71781_c5_g3|TRINITY_DN74602_c1_g1|TRINITY_DN46029_c0_g3|TRINITY_DN46029_c0_g2|TRINITY_DN61265_c0_g6|TRINITY_DN76407_c3_g3|TRINITY_DN54296_c1_g1|TRINITY_DN67618_c0_g3|TRINITY_DN87756_c0_g1|TRINITY_DN72719_c0_g3|TRINITY_DN105228_c0_g1|TRINITY_DN99354_c0_g1|TRI…	1667	TRINITY_DN78084_c3_g4|TRINITY_DN76163_c0_g1|TRINITY_DN73926_c1_g1|TRINITY_DN88256_c0_g1|TRINITY_DN74686_c4_g4|TRINITY_DN62510_c0_g1|TRINITY_DN27198_c0_g1|TRINITY_DN62510_c0_g3|TRINITY_DN79114_c0_g1|TRINITY_DN83950_c1_g1|TRINITY_DN75988_c1_g11|TRINITY_DN77392_c1_g3|TRINITY_DN43063_c0_g1|TRINITY_DN82619_c4_g1|TRINITY_DN51939_c0_g1|TRINITY_DN72763_c1_g1|TRINITY_DN62510_c0_g4|TRINITY_DN83402_c2_g4|TR…	775	TRINITY_DN94176_c0_g1|TRINITY_DN83933_c0_g3|TRINITY_DN96743_c0_g1|TRINITY_DN104718_c0_g1|TRINITY_DN97814_c0_g1|TRINITY_DN74686_c4_g6|TRINITY_DN74686_c4_g3|TRINITY_DN74686_c4_g2|TRINITY_DN90890_c0_g1|TRINITY_DN75835_c1_g11|TRINITY_DN101609_c0_g1|TRINITY_DN53029_c0_g1|TRINITY_DN68737_c2_g1|TRINITY_DN31092_c0_g2|TRINITY_DN77392_c1_g5|TRINITY_DN77392_c1_g6|TRINITY_DN77392_c1_g1|TRINITY_DN82895_c0_g2|…	892	yes
purine-containing compound metabolic process	GO:0072521	1.22256e-06	8.47917e-05	--	2474	TRINITY_DN75569_c2_g4|TRINITY_DN75569_c2_g3|TRINITY_DN23210_c0_g1|TRINITY_DN33655_c0_g1|TRINITY_DN23880_c0_g1|TRINITY_DN3189_c0_g1|TRINITY_DN15528_c0_g1|TRINITY_DN79110_c1_g1|TRINITY_DN79595_c0_g2|TRINITY_DN41271_c0_g1|TRINITY_DN77566_c0_g2|TRINITY_DN44319_c0_g3|TRINITY_DN83692_c1_g1|TRINITY_DN74026_c0_g2|TRINITY_DN83692_c1_g3|TRINITY_DN78751_c2_g1|TRINITY_DN95504_c0_g1|TRINITY_DN74026_c0_g4|TRIN…	821	TRINITY_DN36713_c0_g1|TRINITY_DN21715_c0_g1|TRINITY_DN75725_c1_g5|TRINITY_DN45144_c0_g1|TRINITY_DN82074_c0_g2|TRINITY_DN74996_c0_g4|TRINITY_DN96034_c0_g1|TRINITY_DN53141_c0_g1|TRINITY_DN57666_c0_g2|TRINITY_DN57666_c0_g3|TRINITY_DN75725_c1_g2|TRINITY_DN84775_c0_g4|TRINITY_DN78176_c1_g3|TRINITY_DN39530_c0_g1|TRINITY_DN78623_c1_g1|TRINITY_DN72791_c0_g1|TRINITY_DN75282_c6_g4|TRINITY_DN77392_c1_g3|TRI…	316	TRINITY_DN53029_c0_g1|TRINITY_DN77392_c1_g5|TRINITY_DN77392_c1_g6|TRINITY_DN77392_c1_g1|TRINITY_DN93228_c0_g1|TRINITY_DN89730_c0_g1|TRINITY_DN50613_c0_g1|TRINITY_DN75643_c2_g1|TRINITY_DN60953_c0_g1|TRINITY_DN7996_c0_g2|TRINITY_DN54363_c0_g1|TRINITY_DN77788_c5_g2|TRINITY_DN76159_c1_g1|TRINITY_DN103074_c0_g1|TRINITY_DN52934_c0_g1|TRINITY_DN85268_c1_g3|TRINITY_DN76403_c1_g13|TRINITY_DN77495_c0_g7|TR…	505	yes
ruffle organization	GO:0031529	1.27705e-06	8.79806e-05	--	57	TRINITY_DN71699_c3_g3|TRINITY_DN75064_c3_g2|TRINITY_DN75064_c3_g1|TRINITY_DN45881_c0_g1|TRINITY_DN82195_c4_g1|TRINITY_DN78524_c2_g1|TRINITY_DN78524_c5_g1|TRINITY_DN100905_c0_g1|TRINITY_DN27870_c0_g1|TRINITY_DN81381_c0_g2|TRINITY_DN82855_c0_g1|TRINITY_DN101151_c0_g1|TRINITY_DN72528_c1_g1|TRINITY_DN35449_c0_g2|TRINITY_DN36426_c0_g1|TRINITY_DN82195_c4_g3|TRINITY_DN75909_c6_g1|TRINITY_DN74319_c0_g5|T…	34	TRINITY_DN35449_c0_g2|TRINITY_DN72027_c7_g1|TRINITY_DN75909_c6_g1|TRINITY_DN77834_c5_g3|TRINITY_DN72027_c9_g2|TRINITY_DN72857_c0_g3|TRINITY_DN27870_c0_g1|TRINITY_DN72380_c5_g2|TRINITY_DN94647_c0_g1	9	TRINITY_DN78524_c2_g1|TRINITY_DN101151_c0_g1|TRINITY_DN75064_c3_g1|TRINITY_DN75064_c3_g2|TRINITY_DN59883_c0_g1|TRINITY_DN72380_c5_g1|TRINITY_DN74319_c0_g5|TRINITY_DN50497_c0_g1|TRINITY_DN78524_c5_g1|TRINITY_DN82855_c0_g1|TRINITY_DN81381_c0_g2|TRINITY_DN45881_c0_g1|TRINITY_DN72528_c1_g1|TRINITY_DN82195_c4_g3|TRINITY_DN61025_c0_g1|TRINITY_DN82195_c4_g1|TRINITY_DN85175_c1_g1|TRINITY_DN103037_c0_g1|T…	25	yes
regulation of glucose-6-phosphatase activity	GO:0032114	1.32507e-06	8.8344e-05	--	23	TRINITY_DN66350_c0_g1|TRINITY_DN67221_c0_g3|TRINITY_DN50403_c0_g1|TRINITY_DN77829_c0_g1|TRINITY_DN77829_c0_g3|TRINITY_DN31501_c0_g1|TRINITY_DN88477_c0_g1|TRINITY_DN8825_c0_g1|TRINITY_DN56897_c0_g1|TRINITY_DN53424_c0_g1|TRINITY_DN56087_c0_g1|TRINITY_DN6382_c0_g1|TRINITY_DN99457_c0_g1|TRINITY_DN67221_c0_g2|TRINITY_DN63515_c0_g1|TRINITY_DN63515_c0_g2|TRINITY_DN63515_c0_g3|TRINITY_DN104080_c0_g1	18	TRINITY_DN50403_c0_g1|TRINITY_DN63515_c0_g2|TRINITY_DN77829_c0_g1|TRINITY_DN63515_c0_g1	4	TRINITY_DN67221_c0_g3|TRINITY_DN8825_c0_g1|TRINITY_DN99457_c0_g1|TRINITY_DN63515_c0_g3|TRINITY_DN56897_c0_g1|TRINITY_DN6382_c0_g1|TRINITY_DN56087_c0_g1|TRINITY_DN88477_c0_g1|TRINITY_DN77829_c0_g3|TRINITY_DN66350_c0_g1|TRINITY_DN67221_c0_g2|TRINITY_DN31501_c0_g1|TRINITY_DN53424_c0_g1|TRINITY_DN104080_c0_g1	14	yes
regulation of carbohydrate phosphatase activity	GO:0032113	1.32507e-06	8.8344e-05	--	23	TRINITY_DN66350_c0_g1|TRINITY_DN67221_c0_g3|TRINITY_DN50403_c0_g1|TRINITY_DN77829_c0_g1|TRINITY_DN77829_c0_g3|TRINITY_DN31501_c0_g1|TRINITY_DN88477_c0_g1|TRINITY_DN8825_c0_g1|TRINITY_DN56897_c0_g1|TRINITY_DN53424_c0_g1|TRINITY_DN56087_c0_g1|TRINITY_DN6382_c0_g1|TRINITY_DN99457_c0_g1|TRINITY_DN67221_c0_g2|TRINITY_DN63515_c0_g1|TRINITY_DN63515_c0_g2|TRINITY_DN63515_c0_g3|TRINITY_DN104080_c0_g1	18	TRINITY_DN50403_c0_g1|TRINITY_DN63515_c0_g2|TRINITY_DN77829_c0_g1|TRINITY_DN63515_c0_g1	4	TRINITY_DN67221_c0_g3|TRINITY_DN8825_c0_g1|TRINITY_DN99457_c0_g1|TRINITY_DN63515_c0_g3|TRINITY_DN56897_c0_g1|TRINITY_DN6382_c0_g1|TRINITY_DN56087_c0_g1|TRINITY_DN88477_c0_g1|TRINITY_DN77829_c0_g3|TRINITY_DN66350_c0_g1|TRINITY_DN67221_c0_g2|TRINITY_DN31501_c0_g1|TRINITY_DN53424_c0_g1|TRINITY_DN104080_c0_g1	14	yes
negative regulation of cGMP metabolic process	GO:0030824	1.32507e-06	8.8344e-05	--	23	TRINITY_DN66350_c0_g1|TRINITY_DN67221_c0_g3|TRINITY_DN50403_c0_g1|TRINITY_DN77829_c0_g1|TRINITY_DN77829_c0_g3|TRINITY_DN31501_c0_g1|TRINITY_DN88477_c0_g1|TRINITY_DN8825_c0_g1|TRINITY_DN56897_c0_g1|TRINITY_DN53424_c0_g1|TRINITY_DN56087_c0_g1|TRINITY_DN6382_c0_g1|TRINITY_DN99457_c0_g1|TRINITY_DN67221_c0_g2|TRINITY_DN63515_c0_g1|TRINITY_DN63515_c0_g2|TRINITY_DN63515_c0_g3|TRINITY_DN104080_c0_g1	18	TRINITY_DN50403_c0_g1|TRINITY_DN63515_c0_g2|TRINITY_DN77829_c0_g1|TRINITY_DN63515_c0_g1	4	TRINITY_DN67221_c0_g3|TRINITY_DN8825_c0_g1|TRINITY_DN99457_c0_g1|TRINITY_DN63515_c0_g3|TRINITY_DN56897_c0_g1|TRINITY_DN6382_c0_g1|TRINITY_DN56087_c0_g1|TRINITY_DN88477_c0_g1|TRINITY_DN77829_c0_g3|TRINITY_DN66350_c0_g1|TRINITY_DN67221_c0_g2|TRINITY_DN31501_c0_g1|TRINITY_DN53424_c0_g1|TRINITY_DN104080_c0_g1	14	yes
translational frameshifting	GO:0006452	1.32417e-06	8.8344e-05	--	150	TRINITY_DN80958_c1_g5|TRINITY_DN72587_c3_g2|TRINITY_DN83227_c0_g1|TRINITY_DN72587_c4_g1|TRINITY_DN86911_c7_g1|TRINITY_DN85884_c1_g4|TRINITY_DN83434_c1_g4|TRINITY_DN75165_c4_g1|TRINITY_DN84110_c2_g8|TRINITY_DN84110_c2_g9|TRINITY_DN75651_c1_g8|TRINITY_DN79486_c2_g1|TRINITY_DN79486_c2_g2|TRINITY_DN79486_c2_g3|TRINITY_DN81827_c5_g1|TRINITY_DN84110_c2_g1|TRINITY_DN84110_c2_g3|TRINITY_DN84110_c2_g4|TRI…	71	TRINITY_DN84110_c2_g6|TRINITY_DN82961_c1_g4|TRINITY_DN72587_c3_g2|TRINITY_DN70158_c0_g1|TRINITY_DN73233_c3_g2|TRINITY_DN50491_c0_g1|TRINITY_DN72704_c0_g1|TRINITY_DN80958_c1_g5|TRINITY_DN82961_c1_g7|TRINITY_DN84110_c2_g9|TRINITY_DN70158_c0_g3|TRINITY_DN81860_c0_g1|TRINITY_DN84693_c2_g10|TRINITY_DN60717_c0_g3|TRINITY_DN82961_c1_g11|TRINITY_DN72587_c3_g10|TRINITY_DN83434_c1_g4|TRINITY_DN60717_c0_g4	18	TRINITY_DN85884_c1_g2|TRINITY_DN85884_c1_g3|TRINITY_DN75069_c0_g7|TRINITY_DN68033_c0_g1|TRINITY_DN85884_c1_g4|TRINITY_DN75069_c0_g2|TRINITY_DN83227_c1_g1|TRINITY_DN75165_c4_g1|TRINITY_DN75069_c0_g4|TRINITY_DN71926_c0_g3|TRINITY_DN84110_c2_g10|TRINITY_DN72587_c4_g1|TRINITY_DN84110_c2_g7|TRINITY_DN84110_c2_g4|TRINITY_DN82961_c1_g6|TRINITY_DN84110_c2_g3|TRINITY_DN82961_c1_g3|TRINITY_DN84110_c2_g1|TR…	53	yes
negative regulation of cGMP biosynthetic process	GO:0030827	1.32507e-06	8.8344e-05	--	23	TRINITY_DN66350_c0_g1|TRINITY_DN67221_c0_g3|TRINITY_DN50403_c0_g1|TRINITY_DN77829_c0_g1|TRINITY_DN77829_c0_g3|TRINITY_DN31501_c0_g1|TRINITY_DN88477_c0_g1|TRINITY_DN8825_c0_g1|TRINITY_DN56897_c0_g1|TRINITY_DN53424_c0_g1|TRINITY_DN56087_c0_g1|TRINITY_DN6382_c0_g1|TRINITY_DN99457_c0_g1|TRINITY_DN67221_c0_g2|TRINITY_DN63515_c0_g1|TRINITY_DN63515_c0_g2|TRINITY_DN63515_c0_g3|TRINITY_DN104080_c0_g1	18	TRINITY_DN50403_c0_g1|TRINITY_DN63515_c0_g2|TRINITY_DN77829_c0_g1|TRINITY_DN63515_c0_g1	4	TRINITY_DN67221_c0_g3|TRINITY_DN8825_c0_g1|TRINITY_DN99457_c0_g1|TRINITY_DN63515_c0_g3|TRINITY_DN56897_c0_g1|TRINITY_DN6382_c0_g1|TRINITY_DN56087_c0_g1|TRINITY_DN88477_c0_g1|TRINITY_DN77829_c0_g3|TRINITY_DN66350_c0_g1|TRINITY_DN67221_c0_g2|TRINITY_DN31501_c0_g1|TRINITY_DN53424_c0_g1|TRINITY_DN104080_c0_g1	14	yes
cell wall polysaccharide metabolic process	GO:0010383	1.46426e-06	9.65963e-05	--	640	TRINITY_DN70827_c0_g1|TRINITY_DN84369_c4_g1|TRINITY_DN39280_c0_g1|TRINITY_DN31030_c0_g1|TRINITY_DN57767_c0_g5|TRINITY_DN27148_c0_g2|TRINITY_DN78213_c1_g4|TRINITY_DN76690_c0_g1|TRINITY_DN83578_c0_g3|TRINITY_DN53933_c0_g1|TRINITY_DN102994_c0_g1|TRINITY_DN91574_c0_g1|TRINITY_DN73352_c0_g1|TRINITY_DN97586_c0_g1|TRINITY_DN83812_c0_g8|TRINITY_DN94325_c0_g1|TRINITY_DN36068_c0_g1|TRINITY_DN77053_c0_g1|TR…	240	TRINITY_DN76690_c4_g2|TRINITY_DN76690_c4_g1|TRINITY_DN71233_c0_g2|TRINITY_DN71364_c1_g1|TRINITY_DN84075_c4_g4|TRINITY_DN71233_c0_g1|TRINITY_DN84075_c4_g2|TRINITY_DN76110_c0_g5|TRINITY_DN80490_c0_g3|TRINITY_DN71611_c0_g1|TRINITY_DN80490_c0_g4|TRINITY_DN76110_c0_g3|TRINITY_DN80490_c0_g6|TRINITY_DN70441_c0_g5|TRINITY_DN76792_c1_g11|TRINITY_DN78005_c4_g1|TRINITY_DN47368_c0_g2|TRINITY_DN27023_c0_g1|TR…	132	TRINITY_DN65501_c0_g2|TRINITY_DN100414_c0_g1|TRINITY_DN83383_c2_g17|TRINITY_DN83383_c2_g16|TRINITY_DN76765_c0_g2|TRINITY_DN100283_c0_g1|TRINITY_DN33041_c0_g1|TRINITY_DN76110_c0_g2|TRINITY_DN93780_c0_g1|TRINITY_DN74746_c2_g1|TRINITY_DN78005_c3_g2|TRINITY_DN92208_c0_g1|TRINITY_DN90760_c0_g1|TRINITY_DN18969_c0_g1|TRINITY_DN80439_c3_g2|TRINITY_DN45439_c0_g1|TRINITY_DN81762_c2_g11|TRINITY_DN23508_c0_g…	108	yes
nucleoside triphosphate metabolic process	GO:0009141	1.46755e-06	9.65963e-05	--	1779	TRINITY_DN75569_c2_g4|TRINITY_DN75569_c2_g3|TRINITY_DN33655_c0_g1|TRINITY_DN3189_c0_g1|TRINITY_DN79110_c1_g1|TRINITY_DN77566_c0_g2|TRINITY_DN50613_c0_g1|TRINITY_DN83692_c1_g1|TRINITY_DN74026_c0_g2|TRINITY_DN83692_c1_g3|TRINITY_DN95504_c0_g1|TRINITY_DN83692_c1_g6|TRINITY_DN79605_c2_g1|TRINITY_DN42493_c0_g3|TRINITY_DN79605_c2_g2|TRINITY_DN79605_c2_g5|TRINITY_DN79605_c2_g4|TRINITY_DN74324_c3_g1|TRIN…	604	TRINITY_DN75725_c1_g2|TRINITY_DN75725_c1_g5|TRINITY_DN45144_c0_g1|TRINITY_DN82074_c0_g2|TRINITY_DN96034_c0_g1|TRINITY_DN68640_c0_g1|TRINITY_DN21715_c0_g1|TRINITY_DN84775_c0_g4|TRINITY_DN78623_c1_g1|TRINITY_DN72791_c0_g1|TRINITY_DN75282_c6_g4|TRINITY_DN77392_c1_g3|TRINITY_DN75725_c1_g4|TRINITY_DN81538_c1_g6|TRINITY_DN83436_c0_g1|TRINITY_DN73154_c0_g1|TRINITY_DN83436_c0_g5|TRINITY_DN77330_c1_g7|TRI…	213	TRINITY_DN53029_c0_g1|TRINITY_DN77392_c1_g5|TRINITY_DN15161_c0_g1|TRINITY_DN77392_c1_g1|TRINITY_DN89730_c0_g1|TRINITY_DN50613_c0_g1|TRINITY_DN75643_c2_g1|TRINITY_DN60953_c0_g1|TRINITY_DN7996_c0_g2|TRINITY_DN54363_c0_g1|TRINITY_DN77788_c5_g2|TRINITY_DN103074_c0_g1|TRINITY_DN85268_c1_g3|TRINITY_DN76403_c1_g13|TRINITY_DN77495_c0_g7|TRINITY_DN85268_c1_g4|TRINITY_DN85268_c1_g5|TRINITY_DN89621_c0_g1|TR…	391	yes
ribose phosphate metabolic process	GO:0019693	1.49285e-06	9.76402e-05	--	2613	TRINITY_DN75569_c2_g4|TRINITY_DN75569_c2_g3|TRINITY_DN23210_c0_g1|TRINITY_DN33655_c0_g1|TRINITY_DN18672_c0_g2|TRINITY_DN3189_c0_g1|TRINITY_DN15528_c0_g1|TRINITY_DN79110_c1_g1|TRINITY_DN67838_c0_g3|TRINITY_DN79595_c0_g2|TRINITY_DN41271_c0_g1|TRINITY_DN77566_c0_g2|TRINITY_DN44319_c0_g3|TRINITY_DN74026_c0_g3|TRINITY_DN74026_c0_g2|TRINITY_DN74026_c0_g1|TRINITY_DN78751_c2_g1|TRINITY_DN95504_c0_g1|TRIN…	863	TRINITY_DN21715_c0_g1|TRINITY_DN75725_c1_g5|TRINITY_DN45144_c0_g1|TRINITY_DN82074_c0_g2|TRINITY_DN96034_c0_g1|TRINITY_DN85860_c1_g3|TRINITY_DN66734_c0_g1|TRINITY_DN57666_c0_g2|TRINITY_DN57666_c0_g3|TRINITY_DN65899_c0_g1|TRINITY_DN75725_c1_g2|TRINITY_DN84775_c0_g4|TRINITY_DN39530_c0_g1|TRINITY_DN72781_c5_g6|TRINITY_DN61473_c1_g1|TRINITY_DN72791_c0_g1|TRINITY_DN75282_c6_g4|TRINITY_DN80442_c1_g1|TRI…	334	TRINITY_DN24367_c0_g1|TRINITY_DN42998_c0_g1|TRINITY_DN53029_c0_g1|TRINITY_DN77392_c1_g5|TRINITY_DN77392_c1_g6|TRINITY_DN77392_c1_g1|TRINITY_DN89730_c0_g1|TRINITY_DN50613_c0_g1|TRINITY_DN75643_c2_g1|TRINITY_DN60953_c0_g1|TRINITY_DN84514_c1_g1|TRINITY_DN19290_c0_g1|TRINITY_DN54363_c0_g1|TRINITY_DN77788_c5_g2|TRINITY_DN103074_c0_g1|TRINITY_DN77801_c0_g1|TRINITY_DN85268_c1_g3|TRINITY_DN76403_c1_g13|T…	529	yes
regulation of nucleotide metabolic process	GO:0006140	1.67033e-06	0.000108561	--	230	TRINITY_DN74757_c2_g4|TRINITY_DN74757_c2_g2|TRINITY_DN3714_c0_g1|TRINITY_DN104953_c0_g1|TRINITY_DN72315_c6_g1|TRINITY_DN20542_c0_g1|TRINITY_DN38464_c0_g1|TRINITY_DN38464_c0_g2|TRINITY_DN100320_c0_g1|TRINITY_DN60175_c0_g3|TRINITY_DN89636_c0_g1|TRINITY_DN72054_c4_g7|TRINITY_DN16352_c0_g1|TRINITY_DN60752_c0_g1|TRINITY_DN60752_c0_g3|TRINITY_DN72942_c0_g4|TRINITY_DN102451_c0_g1|TRINITY_DN81362_c0_g4|T…	100	TRINITY_DN76598_c1_g2|TRINITY_DN79683_c2_g4|TRINITY_DN74757_c2_g2|TRINITY_DN73740_c0_g3|TRINITY_DN72315_c6_g1|TRINITY_DN39913_c0_g2|TRINITY_DN74757_c2_g4|TRINITY_DN60175_c0_g3|TRINITY_DN67536_c0_g2|TRINITY_DN67536_c0_g1|TRINITY_DN56726_c1_g2|TRINITY_DN77829_c0_g1|TRINITY_DN60836_c0_g1|TRINITY_DN76898_c2_g1|TRINITY_DN72054_c4_g7|TRINITY_DN80414_c0_g4|TRINITY_DN51906_c0_g1|TRINITY_DN72942_c0_g4|TRI…	33	TRINITY_DN54310_c0_g2|TRINITY_DN67292_c0_g1|TRINITY_DN66224_c0_g2|TRINITY_DN44752_c0_g1|TRINITY_DN56897_c0_g1|TRINITY_DN75752_c1_g2|TRINITY_DN75752_c1_g7|TRINITY_DN6382_c0_g1|TRINITY_DN102974_c0_g1|TRINITY_DN5714_c0_g1|TRINITY_DN53585_c0_g1|TRINITY_DN21191_c0_g1|TRINITY_DN63507_c0_g2|TRINITY_DN71909_c1_g1|TRINITY_DN67221_c0_g2|TRINITY_DN8825_c0_g1|TRINITY_DN104080_c0_g1|TRINITY_DN72315_c3_g2|TRIN…	67	yes
regulation of cellular component biogenesis	GO:0044087	1.73916e-06	0.000112328	--	1644	TRINITY_DN81408_c3_g1|TRINITY_DN69940_c2_g2|TRINITY_DN69940_c2_g1|TRINITY_DN53530_c0_g1|TRINITY_DN57035_c0_g1|TRINITY_DN82195_c4_g6|TRINITY_DN82195_c4_g1|TRINITY_DN82195_c4_g3|TRINITY_DN38342_c0_g1|TRINITY_DN76259_c0_g1|TRINITY_DN74483_c2_g1|TRINITY_DN62950_c0_g1|TRINITY_DN76232_c1_g1|TRINITY_DN96592_c0_g1|TRINITY_DN60607_c0_g4|TRINITY_DN37330_c0_g1|TRINITY_DN95623_c0_g1|TRINITY_DN81362_c0_g4|TRI…	561	TRINITY_DN67337_c0_g1|TRINITY_DN73441_c3_g2|TRINITY_DN90107_c0_g1|TRINITY_DN73441_c3_g5|TRINITY_DN79430_c1_g6|TRINITY_DN73441_c3_g7|TRINITY_DN72937_c1_g6|TRINITY_DN72937_c1_g4|TRINITY_DN24923_c0_g1|TRINITY_DN68837_c2_g2|TRINITY_DN54016_c0_g1|TRINITY_DN77834_c4_g2|TRINITY_DN65211_c0_g2|TRINITY_DN79430_c1_g4|TRINITY_DN67247_c0_g3|TRINITY_DN73497_c0_g1|TRINITY_DN72580_c2_g1|TRINITY_DN80961_c3_g3|TRI…	208	TRINITY_DN99764_c0_g1|TRINITY_DN12184_c0_g1|TRINITY_DN74483_c3_g1|TRINITY_DN73497_c0_g3|TRINITY_DN93968_c0_g1|TRINITY_DN56764_c0_g1|TRINITY_DN56764_c0_g2|TRINITY_DN62950_c0_g1|TRINITY_DN44989_c0_g1|TRINITY_DN51908_c0_g1|TRINITY_DN74483_c3_g2|TRINITY_DN81831_c0_g1|TRINITY_DN81831_c0_g2|TRINITY_DN85803_c0_g5|TRINITY_DN76670_c2_g1|TRINITY_DN78552_c0_g1|TRINITY_DN78157_c2_g3|TRINITY_DN101187_c0_g1|TR…	353	yes
cell-matrix adhesion	GO:0007160	1.86056e-06	0.000119423	--	60	TRINITY_DN34604_c0_g1|TRINITY_DN64434_c0_g1|TRINITY_DN41473_c0_g2|TRINITY_DN94040_c0_g1|TRINITY_DN61111_c0_g1|TRINITY_DN75692_c1_g1|TRINITY_DN75692_c1_g2|TRINITY_DN51721_c0_g1|TRINITY_DN69072_c0_g2|TRINITY_DN65225_c0_g1|TRINITY_DN25089_c0_g1|TRINITY_DN68691_c0_g1|TRINITY_DN10800_c0_g1|TRINITY_DN92127_c0_g1|TRINITY_DN31183_c0_g2|TRINITY_DN81624_c0_g1|TRINITY_DN55659_c0_g1|TRINITY_DN38809_c0_g2|TRI…	35	TRINITY_DN18560_c0_g1|TRINITY_DN34604_c0_g1|TRINITY_DN58888_c0_g2|TRINITY_DN51289_c1_g1|TRINITY_DN81624_c1_g2|TRINITY_DN34840_c0_g1|TRINITY_DN41473_c0_g2|TRINITY_DN75692_c1_g1|TRINITY_DN77411_c0_g1	9	TRINITY_DN55659_c0_g1|TRINITY_DN69072_c0_g2|TRINITY_DN92854_c0_g1|TRINITY_DN68691_c0_g1|TRINITY_DN38809_c0_g2|TRINITY_DN64434_c0_g1|TRINITY_DN94040_c0_g1|TRINITY_DN92127_c0_g1|TRINITY_DN61111_c0_g1|TRINITY_DN70299_c0_g1|TRINITY_DN77411_c0_g2|TRINITY_DN65225_c0_g1|TRINITY_DN60685_c0_g3|TRINITY_DN81624_c0_g1|TRINITY_DN68750_c0_g4|TRINITY_DN68750_c0_g5|TRINITY_DN63341_c0_g1|TRINITY_DN68750_c0_g1|TRI…	26	yes
ethanol metabolic process	GO:0006067	1.88868e-06	0.000120479	--	287	TRINITY_DN87045_c2_g2|TRINITY_DN85431_c1_g7|TRINITY_DN96950_c0_g1|TRINITY_DN43349_c0_g1|TRINITY_DN93647_c0_g1|TRINITY_DN68183_c0_g1|TRINITY_DN80162_c3_g3|TRINITY_DN85429_c4_g10|TRINITY_DN75173_c0_g3|TRINITY_DN75173_c0_g2|TRINITY_DN76592_c1_g10|TRINITY_DN80279_c0_g6|TRINITY_DN76042_c0_g1|TRINITY_DN96571_c0_g1|TRINITY_DN85431_c1_g4|TRINITY_DN80279_c0_g4|TRINITY_DN77300_c0_g1|TRINITY_DN77300_c0_g2|T…	120	TRINITY_DN82518_c2_g5|TRINITY_DN74592_c1_g1|TRINITY_DN80279_c0_g8|TRINITY_DN78940_c3_g3|TRINITY_DN80279_c0_g4|TRINITY_DN80279_c0_g5|TRINITY_DN80279_c0_g6|TRINITY_DN80162_c3_g2|TRINITY_DN80279_c0_g1|TRINITY_DN80279_c0_g2|TRINITY_DN31329_c0_g1|TRINITY_DN85429_c4_g5|TRINITY_DN93647_c0_g1|TRINITY_DN76042_c2_g1|TRINITY_DN75173_c0_g3|TRINITY_DN75173_c0_g2|TRINITY_DN87045_c2_g2|TRINITY_DN58852_c0_g1|TRI…	43	TRINITY_DN82518_c1_g1|TRINITY_DN73781_c0_g2|TRINITY_DN82518_c2_g6|TRINITY_DN78940_c3_g6|TRINITY_DN73097_c0_g4|TRINITY_DN73097_c0_g5|TRINITY_DN82518_c2_g2|TRINITY_DN73097_c0_g7|TRINITY_DN62533_c0_g1|TRINITY_DN85429_c4_g3|TRINITY_DN80279_c0_g7|TRINITY_DN81492_c2_g4|TRINITY_DN80279_c0_g3|TRINITY_DN73781_c1_g4|TRINITY_DN73781_c0_g1|TRINITY_DN85431_c1_g7|TRINITY_DN85431_c1_g4|TRINITY_DN48679_c0_g1|TRI…	77	yes
purine nucleotide metabolic process	GO:0006163	2.03665e-06	0.000129121	--	2162	TRINITY_DN75569_c2_g4|TRINITY_DN75569_c2_g3|TRINITY_DN23210_c0_g1|TRINITY_DN33655_c0_g1|TRINITY_DN3189_c0_g1|TRINITY_DN15528_c0_g1|TRINITY_DN79110_c1_g1|TRINITY_DN79595_c0_g2|TRINITY_DN41271_c0_g1|TRINITY_DN77566_c0_g2|TRINITY_DN44319_c0_g3|TRINITY_DN83692_c1_g1|TRINITY_DN74026_c0_g2|TRINITY_DN74026_c0_g1|TRINITY_DN61503_c0_g1|TRINITY_DN78751_c2_g1|TRINITY_DN95504_c0_g1|TRINITY_DN74026_c0_g4|TRIN…	722	TRINITY_DN21715_c0_g1|TRINITY_DN75725_c1_g5|TRINITY_DN45144_c0_g1|TRINITY_DN96034_c0_g1|TRINITY_DN57666_c0_g2|TRINITY_DN57666_c0_g3|TRINITY_DN75725_c1_g2|TRINITY_DN84775_c0_g4|TRINITY_DN78176_c1_g3|TRINITY_DN39530_c0_g1|TRINITY_DN72781_c5_g6|TRINITY_DN72791_c0_g1|TRINITY_DN75282_c6_g4|TRINITY_DN77392_c1_g3|TRINITY_DN66734_c0_g1|TRINITY_DN81538_c1_g6|TRINITY_DN83436_c0_g1|TRINITY_DN73154_c0_g1|TRI…	272	TRINITY_DN53029_c0_g1|TRINITY_DN77392_c1_g5|TRINITY_DN77392_c1_g6|TRINITY_DN77392_c1_g1|TRINITY_DN93228_c0_g1|TRINITY_DN89730_c0_g1|TRINITY_DN50613_c0_g1|TRINITY_DN75643_c2_g1|TRINITY_DN60953_c0_g1|TRINITY_DN7996_c0_g2|TRINITY_DN54363_c0_g1|TRINITY_DN77788_c5_g2|TRINITY_DN103074_c0_g1|TRINITY_DN52934_c0_g1|TRINITY_DN85268_c1_g3|TRINITY_DN76403_c1_g13|TRINITY_DN77495_c0_g7|TRINITY_DN85268_c1_g4|TR…	450	yes
organic hydroxy compound metabolic process	GO:1901615	2.06183e-06	0.000129921	--	2469	TRINITY_DN74790_c0_g3|TRINITY_DN74790_c0_g2|TRINITY_DN77192_c1_g3|TRINITY_DN77192_c1_g5|TRINITY_DN69283_c0_g2|TRINITY_DN74790_c0_g8|TRINITY_DN56655_c0_g3|TRINITY_DN65994_c0_g1|TRINITY_DN68183_c0_g1|TRINITY_DN43033_c0_g1|TRINITY_DN83048_c1_g1|TRINITY_DN95257_c0_g1|TRINITY_DN92047_c0_g1|TRINITY_DN90782_c0_g1|TRINITY_DN75173_c0_g3|TRINITY_DN75173_c0_g2|TRINITY_DN40070_c0_g2|TRINITY_DN5738_c0_g1|TRIN…	817	TRINITY_DN73714_c3_g3|TRINITY_DN73714_c3_g6|TRINITY_DN96929_c0_g1|TRINITY_DN74995_c0_g1|TRINITY_DN79947_c1_g7|TRINITY_DN8173_c0_g1|TRINITY_DN30210_c0_g1|TRINITY_DN61649_c0_g6|TRINITY_DN37347_c0_g1|TRINITY_DN84408_c2_g2|TRINITY_DN67867_c0_g3|TRINITY_DN77811_c6_g1|TRINITY_DN38201_c0_g2|TRINITY_DN79605_c2_g5|TRINITY_DN74964_c0_g2|TRINITY_DN79605_c2_g2|TRINITY_DN77251_c1_g3|TRINITY_DN77029_c0_g1|TRIN…	365	TRINITY_DN64880_c0_g2|TRINITY_DN72441_c0_g2|TRINITY_DN84014_c0_g2|TRINITY_DN72441_c0_g4|TRINITY_DN58250_c0_g1|TRINITY_DN78940_c3_g2|TRINITY_DN16219_c0_g1|TRINITY_DN26150_c0_g1|TRINITY_DN26150_c0_g2|TRINITY_DN75332_c0_g1|TRINITY_DN84408_c2_g8|TRINITY_DN61649_c0_g5|TRINITY_DN43507_c0_g3|TRINITY_DN43507_c0_g2|TRINITY_DN32225_c0_g2|TRINITY_DN61649_c0_g1|TRINITY_DN32225_c0_g1|TRINITY_DN84408_c2_g1|TRI…	452	yes
hexose biosynthetic process	GO:0019319	2.14557e-06	0.000134377	--	351	TRINITY_DN74768_c0_g3|TRINITY_DN76501_c0_g1|TRINITY_DN83655_c1_g15|TRINITY_DN76501_c0_g2|TRINITY_DN83655_c1_g10|TRINITY_DN83655_c1_g11|TRINITY_DN33655_c0_g1|TRINITY_DN50_c0_g1|TRINITY_DN5395_c0_g1|TRINITY_DN48767_c0_g2|TRINITY_DN81425_c2_g12|TRINITY_DN85804_c3_g4|TRINITY_DN85804_c3_g5|TRINITY_DN77566_c0_g1|TRINITY_DN59717_c0_g1|TRINITY_DN77918_c2_g1|TRINITY_DN79605_c2_g1|TRINITY_DN85816_c1_g1|TRI…	142	TRINITY_DN36713_c0_g1|TRINITY_DN28091_c0_g1|TRINITY_DN71999_c0_g3|TRINITY_DN78773_c1_g3|TRINITY_DN104592_c0_g1|TRINITY_DN81425_c2_g12|TRINITY_DN81425_c2_g13|TRINITY_DN72317_c0_g1|TRINITY_DN78773_c1_g9|TRINITY_DN81425_c2_g18|TRINITY_DN79605_c2_g5|TRINITY_DN77395_c4_g3|TRINITY_DN77918_c2_g1|TRINITY_DN81425_c2_g2|TRINITY_DN80565_c1_g1|TRINITY_DN74785_c1_g1|TRINITY_DN74785_c1_g2|TRINITY_DN19932_c0_g1…	45	TRINITY_DN103708_c0_g1|TRINITY_DN77918_c1_g1|TRINITY_DN77918_c1_g5|TRINITY_DN93706_c0_g1|TRINITY_DN84219_c2_g4|TRINITY_DN78068_c4_g2|TRINITY_DN78068_c4_g1|TRINITY_DN33655_c0_g1|TRINITY_DN86207_c0_g5|TRINITY_DN86207_c0_g4|TRINITY_DN42918_c0_g4|TRINITY_DN50_c0_g1|TRINITY_DN42918_c0_g2|TRINITY_DN42918_c0_g3|TRINITY_DN42918_c0_g1|TRINITY_DN80159_c0_g1|TRINITY_DN79605_c2_g4|TRINITY_DN81383_c0_g5|TRINI…	97	yes
regulation of myosin II filament organization	GO:0043519	2.31326e-06	0.000144008	--	40	TRINITY_DN65740_c0_g1|TRINITY_DN69940_c2_g2|TRINITY_DN69940_c2_g1|TRINITY_DN34594_c0_g5|TRINITY_DN34594_c0_g4|TRINITY_DN34594_c0_g2|TRINITY_DN44909_c0_g1|TRINITY_DN103816_c0_g1|TRINITY_DN69940_c4_g8|TRINITY_DN65740_c2_g4|TRINITY_DN65740_c2_g5|TRINITY_DN65740_c2_g1|TRINITY_DN65740_c2_g2|TRINITY_DN69940_c0_g1|TRINITY_DN56764_c0_g2|TRINITY_DN60607_c0_g4|TRINITY_DN70748_c4_g8|TRINITY_DN89636_c0_g1|TR…	26	TRINITY_DN65740_c0_g1|TRINITY_DN69940_c2_g2|TRINITY_DN65740_c2_g1|TRINITY_DN72054_c4_g7|TRINITY_DN69940_c2_g1	5	TRINITY_DN60607_c0_g4|TRINITY_DN34594_c0_g5|TRINITY_DN34594_c0_g4|TRINITY_DN99481_c0_g1|TRINITY_DN34594_c0_g2|TRINITY_DN103816_c0_g1|TRINITY_DN56764_c0_g1|TRINITY_DN56764_c0_g2|TRINITY_DN44909_c0_g1|TRINITY_DN70748_c4_g5|TRINITY_DN70748_c4_g4|TRINITY_DN65740_c2_g2|TRINITY_DN89636_c0_g1|TRINITY_DN69940_c0_g1|TRINITY_DN70748_c4_g1|TRINITY_DN65740_c2_g4|TRINITY_DN65740_c2_g5|TRINITY_DN70748_c4_g8|TR…	21	yes
ganglioside catabolic process	GO:0006689	2.55543e-06	0.000157189	--	18	TRINITY_DN69500_c0_g1|TRINITY_DN69500_c0_g2|TRINITY_DN47627_c0_g1|TRINITY_DN1597_c0_g1|TRINITY_DN88608_c0_g1|TRINITY_DN71711_c0_g1|TRINITY_DN67138_c0_g1|TRINITY_DN18513_c0_g1|TRINITY_DN58164_c0_g2|TRINITY_DN66528_c0_g1|TRINITY_DN53365_c0_g1|TRINITY_DN63143_c0_g1|TRINITY_DN1597_c0_g2|TRINITY_DN63143_c0_g3|TRINITY_DN63143_c0_g2	15	TRINITY_DN67138_c0_g1|TRINITY_DN71711_c0_g1	2	TRINITY_DN58164_c0_g2|TRINITY_DN18513_c0_g1|TRINITY_DN47627_c0_g1|TRINITY_DN1597_c0_g2|TRINITY_DN1597_c0_g1|TRINITY_DN63143_c0_g2|TRINITY_DN63143_c0_g1|TRINITY_DN53365_c0_g1|TRINITY_DN66528_c0_g1|TRINITY_DN63143_c0_g3|TRINITY_DN88608_c0_g1|TRINITY_DN69500_c0_g2|TRINITY_DN69500_c0_g1	13	yes
ganglioside metabolic process	GO:0001573	2.55543e-06	0.000157189	--	18	TRINITY_DN18513_c0_g1|TRINITY_DN69500_c0_g2|TRINITY_DN69500_c0_g1|TRINITY_DN53365_c0_g1|TRINITY_DN63143_c0_g1|TRINITY_DN47627_c0_g1|TRINITY_DN88608_c0_g1|TRINITY_DN71711_c0_g1|TRINITY_DN67138_c0_g1|TRINITY_DN58164_c0_g2|TRINITY_DN66528_c0_g1|TRINITY_DN63143_c0_g2|TRINITY_DN1597_c0_g1|TRINITY_DN63143_c0_g3|TRINITY_DN1597_c0_g2	15	TRINITY_DN67138_c0_g1|TRINITY_DN71711_c0_g1	2	TRINITY_DN58164_c0_g2|TRINITY_DN69500_c0_g1|TRINITY_DN47627_c0_g1|TRINITY_DN1597_c0_g2|TRINITY_DN1597_c0_g1|TRINITY_DN63143_c0_g2|TRINITY_DN63143_c0_g1|TRINITY_DN53365_c0_g1|TRINITY_DN66528_c0_g1|TRINITY_DN63143_c0_g3|TRINITY_DN88608_c0_g1|TRINITY_DN69500_c0_g2|TRINITY_DN18513_c0_g1	13	yes
protein peptidyl-prolyl isomerization	GO:0000413	2.72529e-06	0.000166646	--	207	TRINITY_DN87528_c6_g1|TRINITY_DN95212_c0_g1|TRINITY_DN80079_c8_g1|TRINITY_DN75174_c2_g1|TRINITY_DN75174_c2_g4|TRINITY_DN57852_c0_g1|TRINITY_DN22791_c0_g1|TRINITY_DN82593_c4_g1|TRINITY_DN68765_c0_g1|TRINITY_DN77437_c6_g1|TRINITY_DN80058_c2_g1|TRINITY_DN78212_c9_g3|TRINITY_DN78212_c9_g2|TRINITY_DN81703_c2_g3|TRINITY_DN86644_c1_g1|TRINITY_DN81732_c2_g3|TRINITY_DN75276_c8_g1|TRINITY_DN75276_c8_g4|TRI…	91	TRINITY_DN81732_c2_g3|TRINITY_DN25516_c0_g1|TRINITY_DN74101_c7_g3|TRINITY_DN78235_c2_g5|TRINITY_DN74101_c3_g1|TRINITY_DN75276_c8_g4|TRINITY_DN73964_c4_g1|TRINITY_DN77437_c5_g2|TRINITY_DN71764_c0_g1|TRINITY_DN82593_c4_g1|TRINITY_DN64776_c0_g1|TRINITY_DN76867_c8_g1|TRINITY_DN75174_c2_g4|TRINITY_DN57664_c0_g1|TRINITY_DN76359_c0_g6|TRINITY_DN74146_c7_g5|TRINITY_DN78212_c9_g3|TRINITY_DN75665_c2_g2|TRI…	32	TRINITY_DN78235_c2_g1|TRINITY_DN81732_c1_g3|TRINITY_DN75665_c4_g1|TRINITY_DN78235_c2_g9|TRINITY_DN78235_c2_g8|TRINITY_DN83501_c0_g1|TRINITY_DN80079_c8_g1|TRINITY_DN76427_c1_g1|TRINITY_DN75276_c8_g1|TRINITY_DN86644_c1_g1|TRINITY_DN78212_c2_g1|TRINITY_DN84416_c1_g1|TRINITY_DN71764_c0_g2|TRINITY_DN75174_c2_g1|TRINITY_DN64776_c0_g2|TRINITY_DN77586_c4_g1|TRINITY_DN76867_c10_g1|TRINITY_DN74101_c5_g1|TR…	59	yes
actin nucleation	GO:0045010	2.87892e-06	0.000175005	--	210	TRINITY_DN29090_c0_g1|TRINITY_DN59962_c0_g1|TRINITY_DN71115_c1_g1|TRINITY_DN94002_c0_g1|TRINITY_DN74594_c0_g1|TRINITY_DN70814_c0_g1|TRINITY_DN74483_c1_g3|TRINITY_DN74483_c1_g1|TRINITY_DN74483_c1_g4|TRINITY_DN74483_c2_g1|TRINITY_DN76232_c1_g1|TRINITY_DN75313_c2_g1|TRINITY_DN102369_c0_g1|TRINITY_DN95623_c0_g1|TRINITY_DN17003_c0_g1|TRINITY_DN37213_c0_g1|TRINITY_DN47956_c0_g4|TRINITY_DN47956_c0_g1|TR…	92	TRINITY_DN76380_c1_g3|TRINITY_DN76380_c1_g1|TRINITY_DN21834_c0_g1|TRINITY_DN90107_c0_g1|TRINITY_DN67701_c1_g1|TRINITY_DN73441_c3_g7|TRINITY_DN72937_c1_g4|TRINITY_DN29466_c0_g2|TRINITY_DN101763_c0_g1|TRINITY_DN74594_c0_g1|TRINITY_DN76558_c1_g1|TRINITY_DN17003_c0_g1|TRINITY_DN50654_c0_g1|TRINITY_DN68855_c0_g3|TRINITY_DN72663_c2_g18|TRINITY_DN71115_c2_g7|TRINITY_DN26838_c0_g1|TRINITY_DN71115_c2_g5|T…	37	TRINITY_DN74483_c3_g3|TRINITY_DN74483_c3_g2|TRINITY_DN74483_c3_g1|TRINITY_DN8004_c0_g1|TRINITY_DN68267_c0_g1|TRINITY_DN97781_c0_g1|TRINITY_DN72663_c2_g15|TRINITY_DN88794_c0_g1|TRINITY_DN47956_c0_g1|TRINITY_DN97365_c0_g1|TRINITY_DN64970_c2_g2|TRINITY_DN74198_c0_g1|TRINITY_DN47956_c0_g4|TRINITY_DN71115_c2_g2|TRINITY_DN71115_c2_g1|TRINITY_DN71115_c1_g1|TRINITY_DN67701_c1_g2|TRINITY_DN71115_c2_g4|TRI…	55	yes
organic substance catabolic process	GO:1901575	3.00052e-06	0.00018133	--	10195	TRINITY_DN75595_c2_g1|TRINITY_DN71597_c0_g1|TRINITY_DN103281_c0_g1|TRINITY_DN103242_c0_g1|TRINITY_DN79994_c1_g5|TRINITY_DN69815_c0_g2|TRINITY_DN69815_c0_g1|TRINITY_DN79994_c1_g1|TRINITY_DN91085_c0_g1|TRINITY_DN83048_c1_g1|TRINITY_DN88500_c0_g1|TRINITY_DN66834_c0_g1|TRINITY_DN78551_c4_g2|TRINITY_DN74728_c0_g3|TRINITY_DN79605_c2_g1|TRINITY_DN80994_c2_g1|TRINITY_DN62519_c0_g1|TRINITY_DN77617_c1_g4|T…	3141	TRINITY_DN78029_c1_g1|TRINITY_DN30419_c0_g1|TRINITY_DN18248_c0_g1|TRINITY_DN68506_c0_g2|TRINITY_DN69537_c0_g1|TRINITY_DN68386_c0_g1|TRINITY_DN67777_c0_g3|TRINITY_DN84660_c0_g1|TRINITY_DN64147_c0_g1|TRINITY_DN71318_c0_g1|TRINITY_DN100384_c0_g1|TRINITY_DN38201_c0_g2|TRINITY_DN62544_c1_g4|TRINITY_DN62544_c1_g5|TRINITY_DN62544_c1_g6|TRINITY_DN62544_c1_g7|TRINITY_DN66209_c1_g1|TRINITY_DN74822_c2_g2|TR…	1380	TRINITY_DN88211_c0_g1|TRINITY_DN89189_c0_g1|TRINITY_DN35069_c0_g1|TRINITY_DN100126_c0_g1|TRINITY_DN35069_c0_g2|TRINITY_DN25817_c0_g1|TRINITY_DN58484_c0_g1|TRINITY_DN52318_c0_g1|TRINITY_DN46760_c0_g1|TRINITY_DN38572_c0_g1|TRINITY_DN40607_c0_g2|TRINITY_DN103053_c0_g1|TRINITY_DN97792_c0_g1|TRINITY_DN63910_c0_g1|TRINITY_DN75417_c6_g1|TRINITY_DN62187_c0_g2|TRINITY_DN20677_c0_g1|TRINITY_DN60023_c0_g1|T…	1761	yes
energy derivation by oxidation of organic compounds	GO:0015980	3.28573e-06	0.000197411	--	858	TRINITY_DN53722_c0_g1|TRINITY_DN86879_c1_g4|TRINITY_DN66702_c0_g1|TRINITY_DN74045_c2_g1|TRINITY_DN76122_c2_g2|TRINITY_DN76122_c2_g3|TRINITY_DN76122_c2_g1|TRINITY_DN76122_c2_g7|TRINITY_DN86428_c1_g1|TRINITY_DN77359_c5_g1|TRINITY_DN97222_c0_g1|TRINITY_DN68994_c0_g1|TRINITY_DN71916_c5_g1|TRINITY_DN35467_c0_g2|TRINITY_DN92204_c0_g1|TRINITY_DN75436_c4_g1|TRINITY_DN4337_c0_g1|TRINITY_DN77100_c0_g2|TRIN…	309	TRINITY_DN68332_c0_g32|TRINITY_DN36713_c0_g1|TRINITY_DN76163_c0_g1|TRINITY_DN73077_c0_g2|TRINITY_DN80021_c1_g5|TRINITY_DN84307_c2_g2|TRINITY_DN84307_c2_g4|TRINITY_DN80021_c2_g1|TRINITY_DN84307_c2_g6|TRINITY_DN86880_c1_g1|TRINITY_DN49403_c0_g1|TRINITY_DN75318_c2_g1|TRINITY_DN80961_c3_g3|TRINITY_DN67254_c0_g3|TRINITY_DN65561_c0_g1|TRINITY_DN26466_c0_g1|TRINITY_DN82926_c1_g10|TRINITY_DN62951_c0_g5|T…	133	TRINITY_DN77081_c0_g1|TRINITY_DN80021_c2_g2|TRINITY_DN75583_c1_g9|TRINITY_DN26168_c0_g1|TRINITY_DN76163_c0_g4|TRINITY_DN77047_c0_g1|TRINITY_DN31086_c0_g2|TRINITY_DN75583_c1_g4|TRINITY_DN79013_c4_g3|TRINITY_DN7480_c0_g1|TRINITY_DN78605_c1_g5|TRINITY_DN100508_c0_g1|TRINITY_DN78605_c1_g6|TRINITY_DN86880_c1_g3|TRINITY_DN79013_c4_g8|TRINITY_DN86880_c1_g5|TRINITY_DN38527_c0_g2|TRINITY_DN31086_c0_g1|TRI…	176	yes
superoxide metabolic process	GO:0006801	3.35619e-06	0.000199327	--	219	TRINITY_DN78715_c0_g2|TRINITY_DN74402_c0_g6|TRINITY_DN103680_c0_g1|TRINITY_DN20542_c0_g1|TRINITY_DN13626_c0_g1|TRINITY_DN45925_c0_g3|TRINITY_DN18375_c0_g1|TRINITY_DN77234_c1_g3|TRINITY_DN82358_c0_g2|TRINITY_DN77234_c1_g4|TRINITY_DN6521_c0_g1|TRINITY_DN73308_c1_g3|TRINITY_DN36462_c0_g2|TRINITY_DN70496_c0_g6|TRINITY_DN35216_c0_g1|TRINITY_DN100172_c0_g1|TRINITY_DN67589_c0_g1|TRINITY_DN45925_c0_g2|TR…	95	TRINITY_DN63263_c0_g1|TRINITY_DN73308_c1_g3|TRINITY_DN78126_c1_g2|TRINITY_DN78926_c1_g9|TRINITY_DN36183_c0_g3|TRINITY_DN61986_c0_g1|TRINITY_DN95526_c0_g1|TRINITY_DN60978_c0_g1|TRINITY_DN45227_c0_g1|TRINITY_DN68783_c0_g1|TRINITY_DN39593_c0_g3|TRINITY_DN44344_c0_g2|TRINITY_DN78715_c0_g2|TRINITY_DN24583_c0_g1|TRINITY_DN71392_c0_g1|TRINITY_DN68810_c0_g1|TRINITY_DN74402_c0_g6|TRINITY_DN82620_c0_g2|TRI…	37	TRINITY_DN63263_c0_g2|TRINITY_DN78715_c1_g1|TRINITY_DN73308_c2_g2|TRINITY_DN73308_c1_g2|TRINITY_DN1303_c0_g1|TRINITY_DN4193_c0_g1|TRINITY_DN95850_c0_g1|TRINITY_DN62309_c0_g3|TRINITY_DN100172_c0_g1|TRINITY_DN16951_c0_g1|TRINITY_DN104347_c0_g1|TRINITY_DN82358_c0_g2|TRINITY_DN35216_c0_g1|TRINITY_DN20734_c0_g1|TRINITY_DN20542_c0_g1|TRINITY_DN83493_c2_g1|TRINITY_DN92181_c0_g1|TRINITY_DN78926_c1_g2|TRI…	58	yes
gluconeogenesis	GO:0006094	3.35403e-06	0.000199327	--	336	TRINITY_DN74768_c0_g3|TRINITY_DN76501_c0_g1|TRINITY_DN83655_c1_g15|TRINITY_DN76501_c0_g2|TRINITY_DN83655_c1_g10|TRINITY_DN83655_c1_g11|TRINITY_DN33655_c0_g1|TRINITY_DN50_c0_g1|TRINITY_DN5395_c0_g1|TRINITY_DN48767_c0_g2|TRINITY_DN61503_c0_g1|TRINITY_DN85804_c3_g4|TRINITY_DN85804_c3_g5|TRINITY_DN77566_c0_g1|TRINITY_DN59717_c0_g1|TRINITY_DN77918_c2_g1|TRINITY_DN79605_c2_g1|TRINITY_DN75338_c0_g2|TRIN…	136	TRINITY_DN36713_c0_g1|TRINITY_DN28091_c0_g1|TRINITY_DN78773_c1_g3|TRINITY_DN104592_c0_g1|TRINITY_DN81425_c2_g12|TRINITY_DN81425_c2_g13|TRINITY_DN72317_c0_g1|TRINITY_DN75408_c2_g2|TRINITY_DN81425_c2_g18|TRINITY_DN79605_c2_g5|TRINITY_DN77395_c4_g3|TRINITY_DN77918_c2_g1|TRINITY_DN81425_c2_g2|TRINITY_DN80565_c1_g1|TRINITY_DN74785_c1_g1|TRINITY_DN74785_c1_g2|TRINITY_DN19932_c0_g1|TRINITY_DN84219_c2_g1…	43	TRINITY_DN103708_c0_g1|TRINITY_DN77918_c1_g1|TRINITY_DN77918_c1_g5|TRINITY_DN93706_c0_g1|TRINITY_DN84219_c2_g4|TRINITY_DN78068_c4_g2|TRINITY_DN78068_c4_g1|TRINITY_DN33655_c0_g1|TRINITY_DN86207_c0_g5|TRINITY_DN86207_c0_g4|TRINITY_DN42918_c0_g4|TRINITY_DN50_c0_g1|TRINITY_DN42918_c0_g2|TRINITY_DN42918_c0_g3|TRINITY_DN42918_c0_g1|TRINITY_DN80159_c0_g1|TRINITY_DN79605_c2_g4|TRINITY_DN81383_c0_g5|TRINI…	93	yes
catabolic process	GO:0009056	3.6308e-06	0.000214404	GO:0044712	11711	TRINITY_DN75595_c2_g1|TRINITY_DN71597_c0_g1|TRINITY_DN103281_c0_g1|TRINITY_DN103242_c0_g1|TRINITY_DN8632_c0_g1|TRINITY_DN79994_c1_g5|TRINITY_DN69815_c0_g2|TRINITY_DN69815_c0_g1|TRINITY_DN75785_c4_g10|TRINITY_DN91085_c0_g1|TRINITY_DN83048_c1_g1|TRINITY_DN88500_c0_g1|TRINITY_DN73055_c0_g1|TRINITY_DN78551_c4_g2|TRINITY_DN74728_c0_g3|TRINITY_DN79605_c2_g1|TRINITY_DN80994_c2_g1|TRINITY_DN62519_c0_g1|T…	3589	TRINITY_DN78029_c1_g1|TRINITY_DN30419_c0_g1|TRINITY_DN18248_c0_g1|TRINITY_DN68506_c0_g2|TRINITY_DN69537_c0_g1|TRINITY_DN77347_c0_g1|TRINITY_DN27357_c0_g1|TRINITY_DN84660_c0_g1|TRINITY_DN64147_c0_g1|TRINITY_DN77460_c3_g1|TRINITY_DN71318_c0_g1|TRINITY_DN100384_c0_g1|TRINITY_DN38201_c0_g2|TRINITY_DN73367_c1_g1|TRINITY_DN62544_c1_g4|TRINITY_DN62544_c1_g5|TRINITY_DN62544_c1_g6|TRINITY_DN62544_c1_g7|TR…	1576	TRINITY_DN88211_c0_g1|TRINITY_DN89189_c0_g1|TRINITY_DN35069_c0_g1|TRINITY_DN100126_c0_g1|TRINITY_DN8632_c0_g1|TRINITY_DN25817_c0_g1|TRINITY_DN58484_c0_g1|TRINITY_DN52318_c0_g1|TRINITY_DN46760_c0_g1|TRINITY_DN38572_c0_g1|TRINITY_DN40607_c0_g2|TRINITY_DN103053_c0_g1|TRINITY_DN97792_c0_g1|TRINITY_DN63910_c0_g1|TRINITY_DN75417_c6_g1|TRINITY_DN62187_c0_g2|TRINITY_DN20677_c0_g1|TRINITY_DN60023_c0_g1|TR…	2013	yes
monosaccharide biosynthetic process	GO:0046364	3.80021e-06	0.000223133	--	407	TRINITY_DN74768_c0_g3|TRINITY_DN76501_c0_g1|TRINITY_DN83655_c1_g15|TRINITY_DN76501_c0_g2|TRINITY_DN83655_c1_g10|TRINITY_DN83655_c1_g11|TRINITY_DN33655_c0_g1|TRINITY_DN32987_c0_g3|TRINITY_DN50_c0_g1|TRINITY_DN77067_c2_g5|TRINITY_DN77067_c2_g4|TRINITY_DN48767_c0_g2|TRINITY_DN61503_c0_g1|TRINITY_DN77067_c2_g2|TRINITY_DN85804_c3_g4|TRINITY_DN85804_c3_g5|TRINITY_DN77566_c0_g1|TRINITY_DN59717_c0_g1|TRI…	160	TRINITY_DN36713_c0_g1|TRINITY_DN28091_c0_g1|TRINITY_DN71999_c0_g3|TRINITY_DN78773_c1_g3|TRINITY_DN104592_c0_g1|TRINITY_DN81425_c2_g12|TRINITY_DN81425_c2_g13|TRINITY_DN72317_c0_g1|TRINITY_DN78773_c1_g9|TRINITY_DN81425_c2_g18|TRINITY_DN79605_c2_g5|TRINITY_DN77395_c4_g3|TRINITY_DN77918_c2_g1|TRINITY_DN81425_c2_g2|TRINITY_DN80565_c1_g1|TRINITY_DN74785_c1_g1|TRINITY_DN74785_c1_g2|TRINITY_DN19932_c0_g1…	54	TRINITY_DN77067_c2_g2|TRINITY_DN42918_c0_g1|TRINITY_DN77067_c2_g5|TRINITY_DN77067_c2_g4|TRINITY_DN54397_c0_g1|TRINITY_DN77918_c1_g1|TRINITY_DN77918_c1_g5|TRINITY_DN93706_c0_g1|TRINITY_DN84219_c2_g4|TRINITY_DN78068_c4_g2|TRINITY_DN84219_c2_g2|TRINITY_DN33655_c0_g1|TRINITY_DN16348_c0_g1|TRINITY_DN86207_c0_g5|TRINITY_DN86207_c0_g4|TRINITY_DN42918_c0_g4|TRINITY_DN50_c0_g1|TRINITY_DN42918_c0_g2|TRINIT…	106	yes
negative regulation of cyclic nucleotide metabolic process	GO:0030800	3.87059e-06	0.000224711	--	28	TRINITY_DN66350_c0_g1|TRINITY_DN67221_c0_g3|TRINITY_DN50403_c0_g1|TRINITY_DN77829_c0_g1|TRINITY_DN77829_c0_g3|TRINITY_DN31501_c0_g1|TRINITY_DN88477_c0_g1|TRINITY_DN13496_c0_g2|TRINITY_DN8825_c0_g1|TRINITY_DN56897_c0_g1|TRINITY_DN53424_c0_g1|TRINITY_DN56087_c0_g1|TRINITY_DN6382_c0_g1|TRINITY_DN99457_c0_g1|TRINITY_DN67221_c0_g2|TRINITY_DN63515_c0_g1|TRINITY_DN63515_c0_g2|TRINITY_DN63515_c0_g3|TRINI…	20	TRINITY_DN50403_c0_g1|TRINITY_DN60836_c0_g1|TRINITY_DN63515_c0_g2|TRINITY_DN77829_c0_g1|TRINITY_DN63515_c0_g1	5	TRINITY_DN67221_c0_g3|TRINITY_DN8825_c0_g1|TRINITY_DN99457_c0_g1|TRINITY_DN63515_c0_g3|TRINITY_DN56897_c0_g1|TRINITY_DN6382_c0_g1|TRINITY_DN56087_c0_g1|TRINITY_DN88477_c0_g1|TRINITY_DN77829_c0_g3|TRINITY_DN66350_c0_g1|TRINITY_DN13496_c0_g2|TRINITY_DN67221_c0_g2|TRINITY_DN31501_c0_g1|TRINITY_DN53424_c0_g1|TRINITY_DN104080_c0_g1	15	yes
negative regulation of cyclic nucleotide biosynthetic process	GO:0030803	3.87059e-06	0.000224711	--	28	TRINITY_DN66350_c0_g1|TRINITY_DN67221_c0_g3|TRINITY_DN50403_c0_g1|TRINITY_DN77829_c0_g1|TRINITY_DN77829_c0_g3|TRINITY_DN31501_c0_g1|TRINITY_DN88477_c0_g1|TRINITY_DN13496_c0_g2|TRINITY_DN8825_c0_g1|TRINITY_DN56897_c0_g1|TRINITY_DN53424_c0_g1|TRINITY_DN56087_c0_g1|TRINITY_DN6382_c0_g1|TRINITY_DN99457_c0_g1|TRINITY_DN67221_c0_g2|TRINITY_DN63515_c0_g1|TRINITY_DN63515_c0_g2|TRINITY_DN63515_c0_g3|TRINI…	20	TRINITY_DN50403_c0_g1|TRINITY_DN60836_c0_g1|TRINITY_DN63515_c0_g2|TRINITY_DN77829_c0_g1|TRINITY_DN63515_c0_g1	5	TRINITY_DN67221_c0_g3|TRINITY_DN8825_c0_g1|TRINITY_DN99457_c0_g1|TRINITY_DN63515_c0_g3|TRINITY_DN56897_c0_g1|TRINITY_DN6382_c0_g1|TRINITY_DN56087_c0_g1|TRINITY_DN88477_c0_g1|TRINITY_DN77829_c0_g3|TRINITY_DN66350_c0_g1|TRINITY_DN13496_c0_g2|TRINITY_DN67221_c0_g2|TRINITY_DN31501_c0_g1|TRINITY_DN53424_c0_g1|TRINITY_DN104080_c0_g1	15	yes
intranuclear rod assembly	GO:1905861	3.93315e-06	0.000227068	--	26	TRINITY_DN62950_c0_g1|TRINITY_DN103816_c0_g1|TRINITY_DN69940_c4_g8|TRINITY_DN36963_c0_g2|TRINITY_DN69940_c2_g1|TRINITY_DN65740_c2_g4|TRINITY_DN65740_c2_g5|TRINITY_DN65740_c2_g1|TRINITY_DN65740_c2_g2|TRINITY_DN69940_c0_g1|TRINITY_DN65740_c0_g1|TRINITY_DN99481_c0_g1|TRINITY_DN35397_c0_g2|TRINITY_DN56764_c0_g2|TRINITY_DN44909_c0_g1|TRINITY_DN61783_c0_g3|TRINITY_DN56764_c0_g1|TRINITY_DN69940_c2_g2|TR…	19	TRINITY_DN69940_c2_g1|TRINITY_DN69940_c2_g2|TRINITY_DN65740_c2_g1|TRINITY_DN65740_c0_g1	4	TRINITY_DN61783_c0_g3|TRINITY_DN61783_c0_g1|TRINITY_DN69940_c0_g1|TRINITY_DN99481_c0_g1|TRINITY_DN103816_c0_g1|TRINITY_DN56764_c0_g1|TRINITY_DN56764_c0_g2|TRINITY_DN35397_c0_g2|TRINITY_DN62950_c0_g1|TRINITY_DN65740_c2_g2|TRINITY_DN44909_c0_g1|TRINITY_DN36963_c0_g2|TRINITY_DN65740_c2_g4|TRINITY_DN65740_c2_g5|TRINITY_DN69940_c4_g8	15	yes
cellular response to glucose starvation	GO:0042149	3.96379e-06	0.000227565	--	151	TRINITY_DN80958_c1_g5|TRINITY_DN70028_c0_g3|TRINITY_DN83227_c0_g1|TRINITY_DN33895_c0_g1|TRINITY_DN85884_c1_g4|TRINITY_DN79486_c2_g3|TRINITY_DN69888_c0_g1|TRINITY_DN65930_c0_g4|TRINITY_DN72164_c3_g3|TRINITY_DN42733_c0_g1|TRINITY_DN75651_c1_g8|TRINITY_DN62529_c0_g1|TRINITY_DN79486_c2_g1|TRINITY_DN79486_c2_g2|TRINITY_DN7807_c0_g2|TRINITY_DN81827_c5_g1|TRINITY_DN81827_c5_g2|TRINITY_DN42079_c1_g1|TRIN…	70	TRINITY_DN84693_c2_g10|TRINITY_DN77454_c2_g1|TRINITY_DN57562_c0_g1|TRINITY_DN73233_c3_g2|TRINITY_DN67244_c0_g3|TRINITY_DN77077_c3_g2|TRINITY_DN80958_c1_g5|TRINITY_DN74270_c0_g1|TRINITY_DN62529_c0_g1|TRINITY_DN81362_c0_g4|TRINITY_DN39707_c0_g1|TRINITY_DN74378_c0_g1|TRINITY_DN57562_c0_g3|TRINITY_DN76820_c3_g1|TRINITY_DN69888_c0_g1|TRINITY_DN17058_c0_g1|TRINITY_DN90909_c0_g1|TRINITY_DN71031_c1_g2	18	TRINITY_DN54310_c0_g2|TRINITY_DN32023_c0_g1|TRINITY_DN83496_c4_g5|TRINITY_DN85884_c1_g2|TRINITY_DN85884_c1_g3|TRINITY_DN85884_c1_g4|TRINITY_DN83227_c1_g1|TRINITY_DN83227_c1_g4|TRINITY_DN24766_c0_g1|TRINITY_DN91354_c0_g1|TRINITY_DN7807_c0_g2|TRINITY_DN79416_c0_g2|TRINITY_DN62630_c0_g3|TRINITY_DN76820_c1_g1|TRINITY_DN42733_c0_g1|TRINITY_DN79857_c4_g3|TRINITY_DN81827_c0_g1|TRINITY_DN71034_c0_g2|TRIN…	52	yes
carboxylic acid metabolic process	GO:0019752	4.09414e-06	0.00023375	--	8501	TRINITY_DN75808_c1_g3|TRINITY_DN79254_c2_g1|TRINITY_DN75808_c1_g6|TRINITY_DN75808_c1_g4|TRINITY_DN78142_c3_g1|TRINITY_DN84494_c1_g1|TRINITY_DN84494_c1_g2|TRINITY_DN62132_c0_g1|TRINITY_DN2633_c0_g1|TRINITY_DN58202_c1_g1|TRINITY_DN95257_c0_g1|TRINITY_DN100886_c0_g1|TRINITY_DN24629_c0_g2|TRINITY_DN75436_c4_g1|TRINITY_DN76257_c2_g5|TRINITY_DN74728_c0_g3|TRINITY_DN74728_c0_g1|TRINITY_DN79605_c2_g1|TRI…	2634	TRINITY_DN76902_c0_g10|TRINITY_DN78376_c0_g9|TRINITY_DN81199_c4_g1|TRINITY_DN53340_c0_g1|TRINITY_DN79506_c2_g1|TRINITY_DN53340_c0_g3|TRINITY_DN41331_c0_g1|TRINITY_DN68506_c0_g3|TRINITY_DN36062_c0_g1|TRINITY_DN71145_c0_g1|TRINITY_DN71773_c0_g2|TRINITY_DN74104_c0_g1|TRINITY_DN78376_c0_g6|TRINITY_DN72417_c0_g7|TRINITY_DN19459_c0_g1|TRINITY_DN77187_c2_g1|TRINITY_DN74995_c0_g1|TRINITY_DN64673_c0_g1|TR…	1134	TRINITY_DN76902_c0_g11|TRINITY_DN89189_c0_g1|TRINITY_DN78196_c0_g1|TRINITY_DN69611_c0_g2|TRINITY_DN58484_c0_g3|TRINITY_DN39989_c0_g3|TRINITY_DN78068_c4_g1|TRINITY_DN39989_c0_g1|TRINITY_DN46760_c0_g1|TRINITY_DN65918_c0_g1|TRINITY_DN84408_c2_g8|TRINITY_DN84408_c2_g1|TRINITY_DN84408_c2_g6|TRINITY_DN100884_c0_g1|TRINITY_DN82794_c2_g1|TRINITY_DN83321_c1_g4|TRINITY_DN62667_c0_g1|TRINITY_DN86981_c1_g1|T…	1500	yes
aminoglycan metabolic process	GO:0006022	5.45132e-06	0.000307612	--	427	TRINITY_DN76506_c3_g5|TRINITY_DN52971_c0_g1|TRINITY_DN76506_c3_g3|TRINITY_DN68688_c0_g1|TRINITY_DN14683_c0_g1|TRINITY_DN83137_c2_g2|TRINITY_DN83812_c0_g8|TRINITY_DN69500_c0_g1|TRINITY_DN69500_c0_g2|TRINITY_DN45015_c0_g3|TRINITY_DN74928_c0_g1|TRINITY_DN83812_c0_g3|TRINITY_DN44861_c0_g2|TRINITY_DN83812_c0_g6|TRINITY_DN74003_c0_g8|TRINITY_DN73640_c0_g1|TRINITY_DN62519_c0_g1|TRINITY_DN80286_c2_g1|TRI…	166	TRINITY_DN78029_c1_g1|TRINITY_DN64944_c0_g1|TRINITY_DN78261_c2_g1|TRINITY_DN74122_c0_g9|TRINITY_DN83383_c2_g1|TRINITY_DN74122_c0_g5|TRINITY_DN76814_c2_g4|TRINITY_DN83912_c1_g3|TRINITY_DN83383_c2_g5|TRINITY_DN74122_c0_g1|TRINITY_DN74122_c0_g3|TRINITY_DN83812_c0_g6|TRINITY_DN76398_c3_g1|TRINITY_DN34487_c0_g2|TRINITY_DN83812_c0_g3|TRINITY_DN34487_c0_g1|TRINITY_DN70074_c0_g1|TRINITY_DN77593_c0_g3|TRI…	61	TRINITY_DN73578_c0_g1|TRINITY_DN43462_c0_g2|TRINITY_DN43462_c0_g1|TRINITY_DN83383_c2_g17|TRINITY_DN83383_c2_g16|TRINITY_DN72368_c0_g1|TRINITY_DN65925_c0_g1|TRINITY_DN35069_c0_g2|TRINITY_DN103341_c0_g1|TRINITY_DN58002_c0_g2|TRINITY_DN64208_c0_g3|TRINITY_DN38590_c0_g1|TRINITY_DN35791_c0_g2|TRINITY_DN92208_c0_g1|TRINITY_DN97555_c0_g1|TRINITY_DN73426_c0_g1|TRINITY_DN73426_c0_g2|TRINITY_DN80439_c3_g2|…	105	yes
purine nucleoside monophosphate biosynthetic process	GO:0009127	5.47712e-06	0.000307612	--	1053	TRINITY_DN75569_c2_g4|TRINITY_DN75569_c2_g3|TRINITY_DN3189_c0_g1|TRINITY_DN79110_c1_g1|TRINITY_DN79595_c0_g2|TRINITY_DN44319_c0_g1|TRINITY_DN44319_c0_g3|TRINITY_DN83692_c1_g1|TRINITY_DN83692_c1_g3|TRINITY_DN78751_c2_g1|TRINITY_DN95504_c0_g1|TRINITY_DN83692_c1_g6|TRINITY_DN76766_c2_g4|TRINITY_DN76766_c2_g5|TRINITY_DN78162_c1_g3|TRINITY_DN76319_c3_g1|TRINITY_DN78287_c1_g2|TRINITY_DN79595_c1_g1|TRIN…	370	TRINITY_DN45144_c0_g1|TRINITY_DN68640_c0_g1|TRINITY_DN84775_c0_g4|TRINITY_DN39530_c0_g1|TRINITY_DN72791_c0_g1|TRINITY_DN77392_c1_g3|TRINITY_DN81538_c1_g6|TRINITY_DN81538_c1_g7|TRINITY_DN77330_c1_g9|TRINITY_DN81538_c1_g8|TRINITY_DN62951_c0_g1|TRINITY_DN55621_c0_g1|TRINITY_DN72632_c0_g3|TRINITY_DN44953_c0_g1|TRINITY_DN61473_c1_g1|TRINITY_DN77495_c0_g3|TRINITY_DN22490_c0_g1|TRINITY_DN85860_c1_g3|TRI…	145	TRINITY_DN72781_c4_g3|TRINITY_DN87193_c0_g1|TRINITY_DN72781_c4_g2|TRINITY_DN77495_c0_g5|TRINITY_DN42011_c0_g1|TRINITY_DN53029_c0_g1|TRINITY_DN93102_c0_g1|TRINITY_DN84775_c0_g6|TRINITY_DN77392_c1_g5|TRINITY_DN92553_c0_g1|TRINITY_DN77392_c1_g6|TRINITY_DN77392_c1_g1|TRINITY_DN91753_c0_g1|TRINITY_DN87678_c0_g1|TRINITY_DN85268_c1_g9|TRINITY_DN89730_c0_g1|TRINITY_DN76156_c0_g3|TRINITY_DN76381_c2_g4|TRI…	225	yes
purine ribonucleoside monophosphate biosynthetic process	GO:0009168	5.47712e-06	0.000307612	--	1053	TRINITY_DN75569_c2_g4|TRINITY_DN75569_c2_g3|TRINITY_DN3189_c0_g1|TRINITY_DN79110_c1_g1|TRINITY_DN79595_c0_g2|TRINITY_DN44319_c0_g1|TRINITY_DN44319_c0_g3|TRINITY_DN83692_c1_g1|TRINITY_DN83692_c1_g3|TRINITY_DN78751_c2_g1|TRINITY_DN95504_c0_g1|TRINITY_DN83692_c1_g6|TRINITY_DN76766_c2_g4|TRINITY_DN76766_c2_g5|TRINITY_DN78162_c1_g3|TRINITY_DN76319_c3_g1|TRINITY_DN78287_c1_g2|TRINITY_DN79595_c1_g1|TRIN…	370	TRINITY_DN45144_c0_g1|TRINITY_DN68640_c0_g1|TRINITY_DN84775_c0_g4|TRINITY_DN39530_c0_g1|TRINITY_DN72791_c0_g1|TRINITY_DN77392_c1_g3|TRINITY_DN81538_c1_g6|TRINITY_DN81538_c1_g7|TRINITY_DN77330_c1_g9|TRINITY_DN81538_c1_g8|TRINITY_DN62951_c0_g1|TRINITY_DN55621_c0_g1|TRINITY_DN72632_c0_g3|TRINITY_DN44953_c0_g1|TRINITY_DN61473_c1_g1|TRINITY_DN77495_c0_g3|TRINITY_DN22490_c0_g1|TRINITY_DN85860_c1_g3|TRI…	145	TRINITY_DN72781_c4_g3|TRINITY_DN87193_c0_g1|TRINITY_DN72781_c4_g2|TRINITY_DN77495_c0_g5|TRINITY_DN42011_c0_g1|TRINITY_DN53029_c0_g1|TRINITY_DN93102_c0_g1|TRINITY_DN84775_c0_g6|TRINITY_DN77392_c1_g5|TRINITY_DN92553_c0_g1|TRINITY_DN77392_c1_g6|TRINITY_DN77392_c1_g1|TRINITY_DN91753_c0_g1|TRINITY_DN87678_c0_g1|TRINITY_DN85268_c1_g9|TRINITY_DN89730_c0_g1|TRINITY_DN76156_c0_g3|TRINITY_DN76381_c2_g4|TRI…	225	yes
regulation of plasma membrane bounded cell projection assembly	GO:0120032	5.606e-06	0.000313148	--	185	TRINITY_DN79430_c1_g11|TRINITY_DN71699_c3_g3|TRINITY_DN72027_c6_g1|TRINITY_DN75064_c3_g2|TRINITY_DN75064_c3_g1|TRINITY_DN36426_c0_g1|TRINITY_DN62329_c0_g1|TRINITY_DN62329_c0_g2|TRINITY_DN78524_c2_g1|TRINITY_DN76193_c3_g1|TRINITY_DN59128_c0_g2|TRINITY_DN78524_c5_g1|TRINITY_DN51461_c0_g2|TRINITY_DN79430_c1_g6|TRINITY_DN60212_c0_g1|TRINITY_DN79430_c1_g4|TRINITY_DN79430_c1_g5|TRINITY_DN81381_c0_g1|TR…	82	TRINITY_DN62329_c0_g2|TRINITY_DN22969_c0_g1|TRINITY_DN60212_c0_g1|TRINITY_DN69535_c1_g6|TRINITY_DN79430_c1_g4|TRINITY_DN72027_c7_g1|TRINITY_DN79430_c1_g6|TRINITY_DN56923_c0_g4|TRINITY_DN75909_c6_g1|TRINITY_DN55517_c0_g1|TRINITY_DN77834_c5_g3|TRINITY_DN74891_c4_g5|TRINITY_DN72027_c9_g2|TRINITY_DN70725_c0_g1|TRINITY_DN70853_c1_g1|TRINITY_DN59128_c0_g2|TRINITY_DN34254_c0_g1|TRINITY_DN94010_c0_g1|TRI…	21	TRINITY_DN63707_c0_g3|TRINITY_DN87267_c3_g6|TRINITY_DN10809_c0_g1|TRINITY_DN56233_c0_g1|TRINITY_DN79430_c1_g5|TRINITY_DN76193_c3_g1|TRINITY_DN75729_c1_g2|TRINITY_DN78524_c2_g1|TRINITY_DN9134_c0_g1|TRINITY_DN82195_c3_g3|TRINITY_DN82195_c4_g3|TRINITY_DN70725_c0_g3|TRINITY_DN20587_c0_g1|TRINITY_DN48909_c0_g2|TRINITY_DN90609_c0_g1|TRINITY_DN31491_c0_g2|TRINITY_DN80765_c1_g1|TRINITY_DN68277_c0_g1|TRIN…	61	yes
melanin metabolic process	GO:0006582	5.72772e-06	0.000318227	--	67	TRINITY_DN70327_c0_g1|TRINITY_DN70327_c0_g3|TRINITY_DN49841_c0_g1|TRINITY_DN62043_c0_g2|TRINITY_DN19101_c0_g1|TRINITY_DN76677_c0_g1|TRINITY_DN631_c0_g1|TRINITY_DN51629_c0_g2|TRINITY_DN51629_c0_g1|TRINITY_DN81381_c0_g1|TRINITY_DN72027_c5_g3|TRINITY_DN72528_c1_g4|TRINITY_DN72528_c1_g3|TRINITY_DN80194_c0_g1|TRINITY_DN49893_c0_g1|TRINITY_DN78297_c0_g3|TRINITY_DN72027_c6_g3|TRINITY_DN72027_c6_g1|TRINI…	37	TRINITY_DN42837_c0_g1|TRINITY_DN78297_c0_g3|TRINITY_DN67512_c0_g1|TRINITY_DN76677_c0_g1|TRINITY_DN49893_c0_g4|TRINITY_DN96929_c0_g1|TRINITY_DN46284_c0_g1|TRINITY_DN70327_c0_g3|TRINITY_DN80194_c0_g1|TRINITY_DN70327_c0_g1|TRINITY_DN49893_c0_g1|TRINITY_DN62043_c0_g2|TRINITY_DN75653_c0_g2|TRINITY_DN49841_c0_g1	14	TRINITY_DN24539_c0_g1|TRINITY_DN103641_c0_g1|TRINITY_DN93611_c0_g1|TRINITY_DN30630_c0_g1|TRINITY_DN44499_c0_g2|TRINITY_DN24539_c0_g2|TRINITY_DN93779_c0_g1|TRINITY_DN72027_c6_g1|TRINITY_DN72027_c6_g3|TRINITY_DN75653_c0_g5|TRINITY_DN75653_c0_g3|TRINITY_DN631_c0_g1|TRINITY_DN86484_c1_g2|TRINITY_DN81381_c0_g1|TRINITY_DN72528_c1_g4|TRINITY_DN72528_c1_g3|TRINITY_DN72027_c5_g3|TRINITY_DN51629_c0_g1|TRIN…	23	yes
proton transport	GO:0015992	5.89444e-06	0.000325739	--	1104	TRINITY_DN75569_c2_g4|TRINITY_DN75569_c2_g3|TRINITY_DN41212_c0_g1|TRINITY_DN3189_c0_g1|TRINITY_DN79595_c0_g2|TRINITY_DN50613_c0_g1|TRINITY_DN74026_c0_g3|TRINITY_DN74026_c0_g2|TRINITY_DN74026_c0_g1|TRINITY_DN95504_c0_g1|TRINITY_DN74026_c0_g4|TRINITY_DN76766_c2_g4|TRINITY_DN76766_c2_g5|TRINITY_DN61265_c0_g3|TRINITY_DN49403_c0_g1|TRINITY_DN61265_c0_g6|TRINITY_DN76319_c3_g1|TRINITY_DN78287_c1_g2|TRIN…	386	TRINITY_DN75725_c1_g2|TRINITY_DN75725_c1_g5|TRINITY_DN75725_c1_g4|TRINITY_DN11892_c0_g1|TRINITY_DN70393_c0_g1|TRINITY_DN68640_c0_g1|TRINITY_DN72834_c1_g1|TRINITY_DN84775_c0_g4|TRINITY_DN62499_c0_g1|TRINITY_DN72791_c0_g1|TRINITY_DN64673_c0_g1|TRINITY_DN77392_c1_g3|TRINITY_DN49403_c0_g1|TRINITY_DN81538_c1_g6|TRINITY_DN81538_c1_g7|TRINITY_DN81538_c1_g8|TRINITY_DN62951_c0_g1|TRINITY_DN84660_c0_g1|TRI…	144	TRINITY_DN97302_c0_g1|TRINITY_DN72781_c4_g3|TRINITY_DN87193_c0_g1|TRINITY_DN97814_c0_g1|TRINITY_DN72781_c4_g2|TRINITY_DN85268_c1_g5|TRINITY_DN75725_c1_g3|TRINITY_DN52257_c0_g2|TRINITY_DN76886_c1_g3|TRINITY_DN101609_c0_g1|TRINITY_DN53029_c0_g1|TRINITY_DN93102_c0_g1|TRINITY_DN53021_c0_g3|TRINITY_DN84775_c0_g6|TRINITY_DN77392_c1_g5|TRINITY_DN54874_c0_g2|TRINITY_DN77392_c1_g6|TRINITY_DN77392_c1_g1|TR…	242	yes
alcohol metabolic process	GO:0006066	5.99239e-06	0.00032939	--	1516	TRINITY_DN74790_c0_g3|TRINITY_DN74790_c0_g2|TRINITY_DN77192_c1_g3|TRINITY_DN77192_c1_g5|TRINITY_DN90782_c0_g1|TRINITY_DN74790_c0_g8|TRINITY_DN65994_c0_g1|TRINITY_DN68183_c0_g1|TRINITY_DN69244_c2_g1|TRINITY_DN77192_c1_g4|TRINITY_DN75173_c0_g3|TRINITY_DN75173_c0_g2|TRINITY_DN82763_c4_g2|TRINITY_DN59646_c0_g2|TRINITY_DN79605_c2_g2|TRINITY_DN79605_c2_g5|TRINITY_DN79605_c2_g4|TRINITY_DN100536_c0_g1|TR…	516	TRINITY_DN73714_c3_g3|TRINITY_DN97989_c0_g1|TRINITY_DN78940_c3_g3|TRINITY_DN73714_c3_g6|TRINITY_DN34974_c0_g1|TRINITY_DN73386_c1_g2|TRINITY_DN78940_c3_g8|TRINITY_DN62007_c0_g1|TRINITY_DN62007_c0_g2|TRINITY_DN93647_c0_g1|TRINITY_DN60449_c0_g1|TRINITY_DN35720_c0_g1|TRINITY_DN54725_c0_g1|TRINITY_DN73177_c4_g4|TRINITY_DN76644_c2_g1|TRINITY_DN69163_c0_g4|TRINITY_DN75723_c1_g1|TRINITY_DN69163_c0_g1|TRI…	219	TRINITY_DN77081_c0_g1|TRINITY_DN15609_c0_g2|TRINITY_DN72441_c0_g4|TRINITY_DN78940_c3_g6|TRINITY_DN72441_c0_g2|TRINITY_DN77029_c1_g2|TRINITY_DN91237_c0_g1|TRINITY_DN78609_c2_g3|TRINITY_DN15609_c0_g1|TRINITY_DN100300_c0_g1|TRINITY_DN61397_c0_g1|TRINITY_DN58250_c0_g1|TRINITY_DN93508_c0_g1|TRINITY_DN73261_c1_g4|TRINITY_DN99216_c0_g1|TRINITY_DN63287_c0_g1|TRINITY_DN103416_c0_g1|TRINITY_DN76516_c1_g1|T…	297	yes
energy coupled proton transport, down electrochemical gradient	GO:0015985	6.06043e-06	0.000329623	--	587	TRINITY_DN75569_c2_g4|TRINITY_DN77166_c3_g1|TRINITY_DN86407_c2_g2|TRINITY_DN75569_c2_g3|TRINITY_DN102708_c0_g1|TRINITY_DN72781_c4_g1|TRINITY_DN73563_c1_g1|TRINITY_DN77166_c4_g1|TRINITY_DN8938_c0_g1|TRINITY_DN3189_c0_g1|TRINITY_DN42640_c0_g1|TRINITY_DN78521_c1_g2|TRINITY_DN78521_c1_g1|TRINITY_DN75643_c2_g1|TRINITY_DN87193_c0_g1|TRINITY_DN83692_c1_g1|TRINITY_DN83692_c1_g3|TRINITY_DN73563_c1_g2|TRIN…	219	TRINITY_DN78909_c0_g4|TRINITY_DN72781_c5_g1|TRINITY_DN73730_c1_g5|TRINITY_DN45144_c0_g1|TRINITY_DN74724_c1_g1|TRINITY_DN68387_c0_g1|TRINITY_DN76086_c2_g2|TRINITY_DN85860_c1_g3|TRINITY_DN76086_c2_g4|TRINITY_DN72791_c0_g1|TRINITY_DN61843_c0_g1|TRINITY_DN104949_c0_g1|TRINITY_DN84775_c0_g4|TRINITY_DN68640_c0_g1|TRINITY_DN70886_c0_g2|TRINITY_DN84404_c0_g5|TRINITY_DN77392_c1_g3|TRINITY_DN81538_c1_g6|TR…	78	TRINITY_DN85268_c1_g4|TRINITY_DN87193_c0_g1|TRINITY_DN85268_c1_g5|TRINITY_DN53029_c0_g1|TRINITY_DN62820_c0_g1|TRINITY_DN84775_c0_g6|TRINITY_DN77392_c1_g5|TRINITY_DN77392_c1_g6|TRINITY_DN77392_c1_g1|TRINITY_DN87678_c0_g1|TRINITY_DN77495_c0_g9|TRINITY_DN89730_c0_g1|TRINITY_DN76381_c2_g4|TRINITY_DN76381_c2_g3|TRINITY_DN75643_c2_g1|TRINITY_DN7996_c0_g2|TRINITY_DN77495_c0_g7|TRINITY_DN54363_c0_g1|TRIN…	141	yes
ATP synthesis coupled proton transport	GO:0015986	6.06043e-06	0.000329623	--	587	TRINITY_DN75569_c2_g4|TRINITY_DN77166_c3_g1|TRINITY_DN86407_c2_g2|TRINITY_DN75569_c2_g3|TRINITY_DN102708_c0_g1|TRINITY_DN72781_c4_g1|TRINITY_DN45144_c0_g1|TRINITY_DN73563_c1_g1|TRINITY_DN77166_c4_g1|TRINITY_DN8938_c0_g1|TRINITY_DN3189_c0_g1|TRINITY_DN42640_c0_g1|TRINITY_DN78521_c1_g2|TRINITY_DN79595_c0_g2|TRINITY_DN78521_c1_g1|TRINITY_DN75643_c2_g1|TRINITY_DN87193_c0_g1|TRINITY_DN83692_c1_g1|TRIN…	219	TRINITY_DN78909_c0_g4|TRINITY_DN72781_c5_g1|TRINITY_DN73730_c1_g5|TRINITY_DN45144_c0_g1|TRINITY_DN74724_c1_g1|TRINITY_DN68387_c0_g1|TRINITY_DN76086_c2_g2|TRINITY_DN85860_c1_g3|TRINITY_DN76086_c2_g4|TRINITY_DN72791_c0_g1|TRINITY_DN61843_c0_g1|TRINITY_DN104949_c0_g1|TRINITY_DN84775_c0_g4|TRINITY_DN68640_c0_g1|TRINITY_DN70886_c0_g2|TRINITY_DN87317_c1_g4|TRINITY_DN77392_c1_g3|TRINITY_DN81538_c1_g6|TR…	78	TRINITY_DN85268_c1_g4|TRINITY_DN87193_c0_g1|TRINITY_DN72781_c4_g2|TRINITY_DN53029_c0_g1|TRINITY_DN62820_c0_g1|TRINITY_DN84775_c0_g6|TRINITY_DN77392_c1_g5|TRINITY_DN77392_c1_g6|TRINITY_DN77392_c1_g1|TRINITY_DN87678_c0_g1|TRINITY_DN77495_c0_g9|TRINITY_DN89730_c0_g1|TRINITY_DN76381_c2_g4|TRINITY_DN76381_c2_g3|TRINITY_DN75643_c2_g1|TRINITY_DN7996_c0_g2|TRINITY_DN77495_c0_g7|TRINITY_DN54363_c0_g1|TRIN…	141	yes
cellular detoxification	GO:1990748	6.30587e-06	0.0003394	--	322	TRINITY_DN76253_c1_g1|TRINITY_DN34090_c0_g2|TRINITY_DN29424_c0_g1|TRINITY_DN88706_c0_g1|TRINITY_DN83255_c4_g3|TRINITY_DN18375_c0_g1|TRINITY_DN46783_c0_g1|TRINITY_DN3076_c0_g1|TRINITY_DN21100_c0_g1|TRINITY_DN95850_c0_g1|TRINITY_DN20485_c0_g1|TRINITY_DN102194_c0_g1|TRINITY_DN35677_c0_g1|TRINITY_DN99713_c0_g1|TRINITY_DN21585_c0_g1|TRINITY_DN45925_c0_g3|TRINITY_DN45925_c0_g2|TRINITY_DN45925_c0_g4|TRI…	130	TRINITY_DN36183_c0_g3|TRINITY_DN70060_c0_g2|TRINITY_DN85642_c2_g2|TRINITY_DN73682_c1_g4|TRINITY_DN83031_c1_g2|TRINITY_DN73896_c2_g1|TRINITY_DN77274_c0_g1|TRINITY_DN71486_c0_g1|TRINITY_DN73333_c4_g1|TRINITY_DN60978_c0_g1|TRINITY_DN45227_c0_g1|TRINITY_DN63856_c0_g1|TRINITY_DN71258_c2_g1|TRINITY_DN73139_c0_g1|TRINITY_DN74351_c1_g1|TRINITY_DN73896_c2_g2|TRINITY_DN74351_c1_g5|TRINITY_DN44344_c0_g2|TRI…	50	TRINITY_DN20470_c0_g1|TRINITY_DN53076_c1_g1|TRINITY_DN61758_c1_g2|TRINITY_DN83493_c2_g1|TRINITY_DN54418_c0_g3|TRINITY_DN4193_c0_g1|TRINITY_DN72467_c0_g8|TRINITY_DN72515_c1_g3|TRINITY_DN102194_c0_g1|TRINITY_DN9837_c0_g2|TRINITY_DN35677_c0_g1|TRINITY_DN73333_c4_g5|TRINITY_DN73066_c2_g3|TRINITY_DN60461_c0_g1|TRINITY_DN16951_c0_g1|TRINITY_DN73066_c2_g4|TRINITY_DN6591_c0_g1|TRINITY_DN73333_c0_g1|TRINI…	80	yes
cellular macromolecule biosynthetic process	GO:0034645	6.2738e-06	0.0003394	GO:0034961	13461	TRINITY_DN85272_c2_g2|TRINITY_DN72811_c4_g14|TRINITY_DN21501_c0_g1|TRINITY_DN100886_c0_g1|TRINITY_DN74308_c0_g1|TRINITY_DN78231_c1_g4|TRINITY_DN78231_c1_g5|TRINITY_DN78231_c1_g3|TRINITY_DN84494_c1_g2|TRINITY_DN78231_c1_g1|TRINITY_DN36143_c0_g4|TRINITY_DN91757_c0_g1|TRINITY_DN43152_c0_g2|TRINITY_DN75439_c6_g2|TRINITY_DN69240_c0_g1|TRINITY_DN42079_c1_g1|TRINITY_DN72817_c1_g1|TRINITY_DN70342_c0_g3|T…	4101	TRINITY_DN72354_c5_g8|TRINITY_DN82300_c7_g1|TRINITY_DN53340_c0_g1|TRINITY_DN62907_c0_g1|TRINITY_DN79485_c4_g1|TRINITY_DN22475_c0_g1|TRINITY_DN72354_c5_g6|TRINITY_DN99131_c0_g1|TRINITY_DN73790_c3_g3|TRINITY_DN77364_c1_g4|TRINITY_DN73497_c0_g1|TRINITY_DN74480_c2_g3|TRINITY_DN11964_c0_g1|TRINITY_DN15752_c0_g1|TRINITY_DN81860_c0_g1|TRINITY_DN74064_c0_g12|TRINITY_DN76956_c0_g3|TRINITY_DN102515_c0_g1|T…	1662	TRINITY_DN80050_c0_g1|TRINITY_DN34786_c0_g1|TRINITY_DN73497_c0_g3|TRINITY_DN77578_c3_g1|TRINITY_DN73790_c3_g5|TRINITY_DN44964_c0_g3|TRINITY_DN83383_c2_g17|TRINITY_DN83383_c2_g16|TRINITY_DN77773_c0_g1|TRINITY_DN91340_c0_g1|TRINITY_DN31657_c0_g1|TRINITY_DN74442_c1_g3|TRINITY_DN74442_c1_g6|TRINITY_DN83198_c1_g1|TRINITY_DN63806_c1_g1|TRINITY_DN54505_c0_g1|TRINITY_DN78657_c2_g1|TRINITY_DN75905_c2_g1|T…	2439	yes
acetate metabolic process	GO:0006083	6.79104e-06	0.00036362	--	183	TRINITY_DN82918_c2_g2|TRINITY_DN76393_c2_g1|TRINITY_DN81192_c0_g4|TRINITY_DN75820_c2_g5|TRINITY_DN76393_c3_g10|TRINITY_DN77093_c2_g1|TRINITY_DN69291_c0_g1|TRINITY_DN83655_c1_g15|TRINITY_DN86181_c0_g6|TRINITY_DN77918_c1_g1|TRINITY_DN83655_c1_g10|TRINITY_DN83655_c1_g11|TRINITY_DN85806_c0_g3|TRINITY_DN84558_c0_g3|TRINITY_DN79564_c4_g7|TRINITY_DN100633_c0_g1|TRINITY_DN82918_c2_g5|TRINITY_DN84216_c4_g…	81	TRINITY_DN79745_c0_g1|TRINITY_DN82918_c2_g2|TRINITY_DN76393_c2_g1|TRINITY_DN77918_c2_g1|TRINITY_DN84216_c1_g1|TRINITY_DN86181_c0_g2|TRINITY_DN78691_c1_g1|TRINITY_DN79593_c2_g1|TRINITY_DN73875_c4_g1|TRINITY_DN69291_c0_g1|TRINITY_DN78609_c0_g1|TRINITY_DN79593_c1_g1|TRINITY_DN79593_c1_g2|TRINITY_DN83910_c2_g4|TRINITY_DN78609_c2_g5	15	TRINITY_DN81192_c0_g5|TRINITY_DN81192_c0_g4|TRINITY_DN77093_c2_g1|TRINITY_DN80410_c0_g2|TRINITY_DN82918_c2_g5|TRINITY_DN81192_c0_g3|TRINITY_DN76393_c3_g10|TRINITY_DN86181_c0_g3|TRINITY_DN73386_c1_g3|TRINITY_DN77093_c0_g1|TRINITY_DN79643_c0_g1|TRINITY_DN100633_c0_g1|TRINITY_DN79643_c0_g5|TRINITY_DN86424_c1_g1|TRINITY_DN75820_c2_g6|TRINITY_DN73875_c5_g1|TRINITY_DN86424_c1_g2|TRINITY_DN79593_c0_g1|T…	66	yes
regulation of cell projection assembly	GO:0060491	7.20048e-06	0.000383555	--	186	TRINITY_DN79430_c1_g11|TRINITY_DN71699_c3_g3|TRINITY_DN82195_c4_g6|TRINITY_DN75064_c3_g2|TRINITY_DN75064_c3_g1|TRINITY_DN62329_c0_g1|TRINITY_DN62329_c0_g2|TRINITY_DN78524_c2_g1|TRINITY_DN76193_c3_g1|TRINITY_DN59128_c0_g2|TRINITY_DN78524_c5_g1|TRINITY_DN70725_c0_g3|TRINITY_DN79430_c1_g6|TRINITY_DN60212_c0_g1|TRINITY_DN79430_c1_g4|TRINITY_DN79430_c1_g5|TRINITY_DN81381_c0_g1|TRINITY_DN70725_c0_g1|TR…	82	TRINITY_DN62329_c0_g2|TRINITY_DN22969_c0_g1|TRINITY_DN60212_c0_g1|TRINITY_DN69535_c1_g6|TRINITY_DN79430_c1_g4|TRINITY_DN72027_c7_g1|TRINITY_DN79430_c1_g6|TRINITY_DN56923_c0_g4|TRINITY_DN75909_c6_g1|TRINITY_DN55517_c0_g1|TRINITY_DN34254_c0_g1|TRINITY_DN74891_c4_g5|TRINITY_DN72027_c9_g2|TRINITY_DN70725_c0_g1|TRINITY_DN77834_c5_g3|TRINITY_DN59128_c0_g2|TRINITY_DN70853_c1_g1|TRINITY_DN94010_c0_g1|TRI…	21	TRINITY_DN63707_c0_g3|TRINITY_DN87267_c3_g6|TRINITY_DN10809_c0_g1|TRINITY_DN56233_c0_g1|TRINITY_DN79430_c1_g5|TRINITY_DN76193_c3_g1|TRINITY_DN75729_c1_g2|TRINITY_DN78524_c2_g1|TRINITY_DN9134_c0_g1|TRINITY_DN82195_c3_g3|TRINITY_DN70725_c0_g3|TRINITY_DN20587_c0_g1|TRINITY_DN48909_c0_g2|TRINITY_DN70725_c0_g4|TRINITY_DN31491_c0_g2|TRINITY_DN80765_c1_g1|TRINITY_DN68277_c0_g1|TRINITY_DN90609_c0_g1|TRIN…	61	yes
cytoplasmic translational elongation	GO:0002182	7.24176e-06	0.000383776	--	121	TRINITY_DN86453_c3_g7|TRINITY_DN86453_c3_g3|TRINITY_DN74652_c1_g1|TRINITY_DN72944_c0_g1|TRINITY_DN87500_c2_g1|TRINITY_DN86453_c3_g9|TRINITY_DN86453_c3_g8|TRINITY_DN77745_c5_g1|TRINITY_DN74071_c3_g1|TRINITY_DN80207_c1_g3|TRINITY_DN75424_c5_g6|TRINITY_DN85731_c3_g1|TRINITY_DN85211_c5_g1|TRINITY_DN81902_c2_g1|TRINITY_DN18905_c0_g1|TRINITY_DN74532_c0_g9|TRINITY_DN79521_c1_g4|TRINITY_DN77976_c0_g6|TRI…	58	TRINITY_DN81770_c3_g2|TRINITY_DN77364_c0_g3|TRINITY_DN74652_c1_g1|TRINITY_DN73237_c2_g1|TRINITY_DN73862_c3_g4|TRINITY_DN50753_c0_g1|TRINITY_DN80207_c1_g3|TRINITY_DN75789_c3_g4|TRINITY_DN86453_c3_g7|TRINITY_DN75789_c3_g6|TRINITY_DN76121_c0_g1|TRINITY_DN75789_c3_g2|TRINITY_DN72587_c3_g10|TRINITY_DN74532_c0_g3|TRINITY_DN72944_c0_g1|TRINITY_DN91359_c0_g1|TRINITY_DN86453_c3_g8|TRINITY_DN73237_c2_g8|TR…	19	TRINITY_DN74071_c3_g1|TRINITY_DN78264_c1_g1|TRINITY_DN74532_c0_g2|TRINITY_DN74532_c0_g6|TRINITY_DN74047_c4_g1|TRINITY_DN74532_c0_g9|TRINITY_DN18905_c0_g1|TRINITY_DN76121_c3_g1|TRINITY_DN74919_c2_g1|TRINITY_DN81902_c2_g1|TRINITY_DN56156_c0_g1|TRINITY_DN86453_c1_g1|TRINITY_DN86453_c2_g1|TRINITY_DN77364_c0_g5|TRINITY_DN74047_c5_g1|TRINITY_DN75178_c0_g1|TRINITY_DN77745_c5_g1|TRINITY_DN84619_c6_g1|TRI…	39	yes
'de novo' cotranslational protein folding	GO:0051083	7.42048e-06	0.000391241	GO:0006444	70	TRINITY_DN80958_c1_g5|TRINITY_DN85884_c1_g3|TRINITY_DN85884_c1_g4|TRINITY_DN79541_c4_g4|TRINITY_DN79541_c4_g1|TRINITY_DN79486_c2_g2|TRINITY_DN79486_c2_g3|TRINITY_DN81827_c5_g1|TRINITY_DN81827_c5_g2|TRINITY_DN78469_c3_g1|TRINITY_DN74808_c1_g7|TRINITY_DN77688_c2_g2|TRINITY_DN78207_c2_g2|TRINITY_DN73233_c3_g2|TRINITY_DN85884_c1_g2|TRINITY_DN83227_c0_g1|TRINITY_DN74587_c6_g3|TRINITY_DN81827_c0_g1|TRI…	38	TRINITY_DN84693_c2_g10|TRINITY_DN79368_c2_g4|TRINITY_DN73233_c3_g2|TRINITY_DN60717_c0_g4|TRINITY_DN80958_c1_g5|TRINITY_DN79541_c4_g4|TRINITY_DN81860_c0_g1|TRINITY_DN79857_c4_g1|TRINITY_DN79857_c4_g6|TRINITY_DN60717_c0_g3	10	TRINITY_DN85884_c1_g2|TRINITY_DN85884_c1_g3|TRINITY_DN85884_c1_g4|TRINITY_DN83227_c1_g1|TRINITY_DN83227_c1_g4|TRINITY_DN78469_c3_g1|TRINITY_DN83006_c6_g1|TRINITY_DN83227_c0_g1|TRINITY_DN79857_c0_g2|TRINITY_DN77688_c2_g2|TRINITY_DN79857_c0_g1|TRINITY_DN81827_c0_g1|TRINITY_DN74587_c6_g3|TRINITY_DN81827_c5_g2|TRINITY_DN81827_c5_g1|TRINITY_DN79541_c4_g1|TRINITY_DN79486_c2_g2|TRINITY_DN79486_c2_g3|TRI…	28	yes
ribosome biogenesis	GO:0042254	7.57951e-06	0.000397597	GO:0007046	953	TRINITY_DN76231_c3_g6|TRINITY_DN74457_c2_g1|TRINITY_DN76231_c3_g5|TRINITY_DN65422_c0_g1|TRINITY_DN43531_c0_g1|TRINITY_DN91813_c0_g1|TRINITY_DN84262_c3_g1|TRINITY_DN24111_c0_g1|TRINITY_DN24111_c0_g2|TRINITY_DN61306_c0_g1|TRINITY_DN91340_c0_g1|TRINITY_DN72387_c0_g1|TRINITY_DN56260_c0_g1|TRINITY_DN16851_c0_g1|TRINITY_DN67838_c0_g3|TRINITY_DN72709_c4_g1|TRINITY_DN74806_c0_g8|TRINITY_DN98669_c0_g1|TRI…	337	TRINITY_DN74067_c0_g3|TRINITY_DN73254_c2_g6|TRINITY_DN31674_c0_g1|TRINITY_DN59113_c0_g1|TRINITY_DN74063_c2_g14|TRINITY_DN75439_c4_g3|TRINITY_DN47621_c0_g3|TRINITY_DN47621_c0_g1|TRINITY_DN77504_c2_g9|TRINITY_DN20269_c0_g1|TRINITY_DN79671_c1_g2|TRINITY_DN98669_c0_g1|TRINITY_DN70261_c0_g4|TRINITY_DN86610_c0_g3|TRINITY_DN72709_c2_g12|TRINITY_DN48793_c0_g1|TRINITY_DN63810_c0_g1|TRINITY_DN75091_c1_g3|T…	125	TRINITY_DN74457_c2_g1|TRINITY_DN83893_c3_g1|TRINITY_DN73254_c2_g7|TRINITY_DN74067_c0_g9|TRINITY_DN73254_c2_g5|TRINITY_DN73254_c2_g4|TRINITY_DN73254_c2_g3|TRINITY_DN48430_c0_g2|TRINITY_DN35097_c0_g2|TRINITY_DN74063_c2_g12|TRINITY_DN97324_c0_g1|TRINITY_DN70871_c1_g1|TRINITY_DN74208_c3_g2|TRINITY_DN74208_c3_g1|TRINITY_DN91340_c0_g1|TRINITY_DN56156_c0_g1|TRINITY_DN77504_c0_g2|TRINITY_DN73120_c1_g10|T…	212	yes
purine-containing compound biosynthetic process	GO:0072522	7.6198e-06	0.000397692	--	1309	TRINITY_DN75569_c2_g4|TRINITY_DN75569_c2_g3|TRINITY_DN3189_c0_g1|TRINITY_DN79110_c1_g1|TRINITY_DN79595_c0_g2|TRINITY_DN44319_c0_g1|TRINITY_DN44319_c0_g3|TRINITY_DN83692_c1_g1|TRINITY_DN71402_c2_g1|TRINITY_DN83692_c1_g3|TRINITY_DN78751_c2_g1|TRINITY_DN95504_c0_g1|TRINITY_DN83692_c1_g6|TRINITY_DN76766_c2_g4|TRINITY_DN76766_c2_g5|TRINITY_DN78162_c1_g3|TRINITY_DN58251_c0_g1|TRINITY_DN76319_c3_g1|TRIN…	450	TRINITY_DN21715_c0_g1|TRINITY_DN66734_c0_g1|TRINITY_DN57666_c0_g2|TRINITY_DN57666_c0_g3|TRINITY_DN84775_c0_g4|TRINITY_DN39530_c0_g1|TRINITY_DN72791_c0_g1|TRINITY_DN77392_c1_g3|TRINITY_DN45144_c0_g1|TRINITY_DN81538_c1_g6|TRINITY_DN74838_c1_g2|TRINITY_DN81538_c1_g8|TRINITY_DN62951_c0_g1|TRINITY_DN87144_c1_g2|TRINITY_DN55621_c0_g1|TRINITY_DN72632_c0_g3|TRINITY_DN44953_c0_g1|TRINITY_DN75557_c3_g5|TRI…	183	TRINITY_DN72781_c4_g3|TRINITY_DN87193_c0_g1|TRINITY_DN72781_c4_g2|TRINITY_DN85268_c1_g5|TRINITY_DN42011_c0_g1|TRINITY_DN53029_c0_g1|TRINITY_DN93102_c0_g1|TRINITY_DN84775_c0_g6|TRINITY_DN77392_c1_g5|TRINITY_DN68277_c0_g1|TRINITY_DN77392_c1_g6|TRINITY_DN77392_c1_g1|TRINITY_DN91753_c0_g1|TRINITY_DN87678_c0_g1|TRINITY_DN85268_c1_g9|TRINITY_DN89730_c0_g1|TRINITY_DN71902_c0_g7|TRINITY_DN76156_c0_g3|TRI…	267	yes
ribonucleoside monophosphate metabolic process	GO:0009161	7.93895e-06	0.000412267	--	2111	TRINITY_DN75569_c2_g4|TRINITY_DN75569_c2_g3|TRINITY_DN23210_c0_g1|TRINITY_DN33655_c0_g1|TRINITY_DN3189_c0_g1|TRINITY_DN15528_c0_g1|TRINITY_DN79110_c1_g1|TRINITY_DN79595_c0_g2|TRINITY_DN41271_c0_g1|TRINITY_DN77566_c0_g2|TRINITY_DN44319_c0_g3|TRINITY_DN83692_c1_g1|TRINITY_DN74026_c0_g2|TRINITY_DN83692_c1_g3|TRINITY_DN61503_c0_g1|TRINITY_DN78751_c2_g1|TRINITY_DN95504_c0_g1|TRINITY_DN83692_c1_g6|TRIN…	700	TRINITY_DN75725_c1_g2|TRINITY_DN75725_c1_g5|TRINITY_DN45144_c0_g1|TRINITY_DN82074_c0_g2|TRINITY_DN96034_c0_g1|TRINITY_DN85860_c1_g3|TRINITY_DN57666_c0_g2|TRINITY_DN57666_c0_g3|TRINITY_DN84775_c0_g4|TRINITY_DN39530_c0_g1|TRINITY_DN72781_c5_g6|TRINITY_DN72791_c0_g1|TRINITY_DN75282_c6_g4|TRINITY_DN77392_c1_g3|TRINITY_DN75725_c1_g4|TRINITY_DN81538_c1_g6|TRINITY_DN83436_c0_g1|TRINITY_DN73154_c0_g1|TRI…	268	TRINITY_DN53029_c0_g1|TRINITY_DN77392_c1_g5|TRINITY_DN77392_c1_g6|TRINITY_DN77392_c1_g1|TRINITY_DN89730_c0_g1|TRINITY_DN50613_c0_g1|TRINITY_DN75643_c2_g1|TRINITY_DN60953_c0_g1|TRINITY_DN7996_c0_g2|TRINITY_DN54363_c0_g1|TRINITY_DN103074_c0_g1|TRINITY_DN52934_c0_g1|TRINITY_DN85268_c1_g3|TRINITY_DN76403_c1_g13|TRINITY_DN77495_c0_g7|TRINITY_DN85268_c1_g4|TRINITY_DN77495_c0_g5|TRINITY_DN89621_c0_g1|TR…	432	yes
purine ribonucleotide biosynthetic process	GO:0009152	8.1497e-06	0.000421095	--	1180	TRINITY_DN75569_c2_g4|TRINITY_DN75569_c2_g3|TRINITY_DN3189_c0_g1|TRINITY_DN79110_c1_g1|TRINITY_DN79595_c0_g2|TRINITY_DN44319_c0_g1|TRINITY_DN44319_c0_g3|TRINITY_DN83692_c1_g1|TRINITY_DN83692_c1_g3|TRINITY_DN78751_c2_g1|TRINITY_DN95504_c0_g1|TRINITY_DN83692_c1_g6|TRINITY_DN76766_c2_g4|TRINITY_DN76766_c2_g5|TRINITY_DN78162_c1_g3|TRINITY_DN76319_c3_g1|TRINITY_DN77166_c6_g2|TRINITY_DN78287_c1_g2|TRIN…	409	TRINITY_DN21715_c0_g1|TRINITY_DN66734_c0_g1|TRINITY_DN68640_c0_g1|TRINITY_DN84775_c0_g4|TRINITY_DN39530_c0_g1|TRINITY_DN72791_c0_g1|TRINITY_DN77392_c1_g3|TRINITY_DN45144_c0_g1|TRINITY_DN81538_c1_g6|TRINITY_DN74838_c1_g2|TRINITY_DN81538_c1_g8|TRINITY_DN62951_c0_g1|TRINITY_DN55621_c0_g1|TRINITY_DN72632_c0_g3|TRINITY_DN44953_c0_g1|TRINITY_DN75557_c3_g5|TRINITY_DN77495_c0_g3|TRINITY_DN22490_c0_g1|TRI…	160	TRINITY_DN68387_c1_g1|TRINITY_DN87193_c0_g1|TRINITY_DN72781_c4_g2|TRINITY_DN85268_c1_g5|TRINITY_DN42011_c0_g1|TRINITY_DN53029_c0_g1|TRINITY_DN93102_c0_g1|TRINITY_DN84775_c0_g6|TRINITY_DN77392_c1_g5|TRINITY_DN68277_c0_g1|TRINITY_DN77392_c1_g6|TRINITY_DN77392_c1_g1|TRINITY_DN91753_c0_g1|TRINITY_DN87678_c0_g1|TRINITY_DN85268_c1_g9|TRINITY_DN89730_c0_g1|TRINITY_DN76156_c0_g3|TRINITY_DN76381_c2_g4|TRI…	249	yes
[truncated: 10,134 more rows]

## Sheet: GO_CC
Table S7c GO terms in Celluar Component of DEGs in Flowers
Term_name	Accession	p-value	FDR	Alt_id	Background_Count	DE_Gene	DE_Count	Up_Gene	Up_Count	Down_Gene	Down_Count	Result
[truncated: 1,509 more rows]

## Sheet: GO_MF
Table S7d GO terms in Molecular Function of DEGs in Flowers
Term_name	Accession	p-value	FDR	Alt_id	Background_Count	DE_Gene	DE_Count	Up_Gene	Up_Count	Down_Gene	Down_Count	Result
[truncated: 3,489 more rows]
